# Supplementary material for: Development and Evaluation of SoySNP50K, a High-Density Genotyping Array for Soybean
Source: PLoS One. 2013 Jan 25;8(1):e54985. doi: 10.1371/journal.pone.0054985 (PMC3555945; doi:10.1371/journal.pone.0054985)
Supplement: Table S1 — SNP type, chromosome and SNP position, alternative alleles, SNP flanking sequences, priority group, scores, polymorphism, position in gene (if applicable), MAF in elite, landrace and wild soybean populations. (XLSX) [file pone.0054985.s001.xlsx]

## Sheet: Sheet1
Table S1. SNP type, chromosome and SNP position, alternative alleles, SNP flanking sequences, priority group, scores, polymorphism, position in gene (if applicable), MAF in elite, landrace and wild soybean populations
SNP ID	Chromosome	Coordinate	Williams 82 allele	Alternative allele	60bp sequence flanking SNP	Bead type success (Y/N)	Priority group	SNP score	Index score	Polymorphism	Position in the gene	MAF in Landrace	MAF in Elite	MAF in G.max	MAF in G. Soja	MAF in Landrace, Elite and G. Soja
BARC_1.01_Gm01_2033_G_A	Gm01	2033	G	A	AATCGATCCTTTTCCATGTTCAAGTACCCATGTTTGGGATTTTTTTCCGTGGGTGTGCCA[G/A]TGGCGTGATACAATTAAGATCGGCCATTAATCATGTTTGGACGTCAAAGAACCCAAAAAA	N	B	0.436	0.36188	Unknown
BARC_1.01_Gm01_24939_A_G	Gm01	24939	A	G	TGGCTCAATCTTCTTGGAGTCTTCTATCCAATGTCCTTGGGGGACAAGATTGCATCACCA[A/G]TGACTTTGGATCTCAACATCATAGAGCTCCAAAGACAACGAGGAAGAAAATAAAGACAAT	Y	B	1	0.83	Y		0.335	0.078	0.198925	0.167	0.196
BARC_1.01_Gm01_25990_C_T	Gm01	25990	C	T	TTAGTTGGAACATCCTTCAATTTAGTGGTCAAGTGATCGGCAGGGCTTTGGTCTTGGAAC[C/T]GCAACTGAACAGCACTGCCTAGGTGCAGGTGCTGTAGTTGGTTGTGCCAATGAGTTTTTC	Y	B	0.915	0.75945	Y		0.328	0.068	0.192513	0.169	0.193
BARC_1.01_Gm01_29658_A_G	Gm01	29658	A	G	GAGTGGCAAACAATGAGCAAAGGGGAGAGGAGGCAATTCGGTTAAGGCAGCTGCAACCCA[A/G]GTCGAACAAAGGGTCGTATGTGGAGGTTGTGTCAGGGAATAAAAGTGGAACAGGCTCAAG	Y	B	1	0.83	Y		0.346	0.078	0.204301	0.139	0.427
BARC_1.01_Gm01_30699_G_A	Gm01	30699	G	A	GAAGAGGAGCTCGCGGCTGCAGCCAAAGAGGAGGAGGTGGAGGCGCTGCCGTCGGGAACA[G/A]TGTTACACGCTACCACCCAATTATCCACTGAACAAAGGATAATCAGCAACCATAAGACAA	Y	B	1	0.83	Y		0.106	0.021	0.0588235	0.121	0.084
BARC_1.01_Gm01_37005_C_T	Gm01	37005	C	T	CTAAACCAAGTGAAATTGTTCCCAAAACATCTTATGTCCTGGAGCTCCATCTCAGATATC[C/T]AGTCATTGAAGTCCGAGGTATCTGAAGTAGCAACAGACCTCTGTGATATGCTAATTCTCT	Y	C	0.9	0.693	Y		0.195	0.057	0.121693	0.031	0.096
BARC_1.01_Gm01_38469_C_A	Gm01	38469	C	A	TCCGCCACTCACCCATGCACGACATGTCTTCAACGATATGGATGACATTTGAAACTCCAT[C/A]TATGACCGCCGTCACCTCCGAATGTATCCCCGGTCTACCGTTTGTCCTGATGAGGACCCT	Y	C	0.81	0.6237	Y		0.096	0.021	0.0578947	0.116	0.077
BARC_1.01_Gm01_46360_A_G	Gm01	46360	A	G	AGCCTTGTCGGTTCTGAGAAGTCGTCTCCGGCGAGGCTGTCAGTGGACTCTATTTCCTCC[A/G]AAGAGTCACTGTAGCATCGTCCTCCGGTATGGTTCTCACAGACCATAGGTCCACATTCTT	Y	B	0.976	0.81008	Y		0.349	0.078	0.205405	0.124	0.439
BARC_1.01_Gm01_49225_G_A	Gm01	49225	G	A	GCATCTCGATTGTAGCAAGTAAGGCGAGTTTCATGACCATAGAGAAGAGCTTCAATTTCG[G/A]CAATGGAGGGAATACGCTTCTAACTCTTCGTGACGAACAGGAACGCCTACGCCAACTAAT	Y	B	0.75	0.6225	Y		0.2	0.057	0.12234	0.032	0.099
BARC_1.01_Gm01_61178_C_T	Gm01	61178	C	T	AATCATCCTGCAAAAAAAATTAAATATTATAAATTGAATTTGAGAGGACGAGCCCTGGTG[C/T]AGCGGTAAAGTTGTGCCTTGGTGACTTGTTGGTCATGGGTTCGAATCCGGAAACAGCCTC	Y	C	0.489	0.37653	Y	CDS	0.339	0.074	0.204301	0.25	0.222
BARC_1.01_Gm01_81983_C_A	Gm01	81983	C	A	CACACACAACACCTATCTTTTTTTGCACACACTTTGAGATATTGGGCTTTATAACTGGGT[C/A]TGTGTGAGTCATAGGGAGTGGAGGTCGATCTGTGGTCATGTTGGGTCTCCGACTCGTTTA	Y	B	0.421	0.34943	Y		0.34	0.078	0.2	0.247	0.226
BARC_1.01_Gm01_83295_A_G	Gm01	83295	A	G	CAAGAGCAGATGAAGGTCGATATGGAGGCCATGAAGGGGCAGATGACAATTATGATGGCA[A/G]CAATGATGAGCATGAACAAGGTGATGAAAGAGTTTTGTGAGGATTTCAAGATCCAACACC	Y	A	0.434	0.434	Y		0.339	0.078	0.202128	0.132	0.434
BARC_1.01_Gm01_90419_T_G	Gm01	90419	T	G	CCAATCACCATCTCAAATCCATTGACAGCAACAACAAAACCCGTAACTACAGGATCCCGG[T/G]GGGTGCCGATGACACGGTGGTGCAAGGGAGTATGTGCTGGATCTGGACGGAGGTGTAGGC	Y	A	1	1	Y		0.344	0.078	0.204301	0.13	0.438
BARC_1.01_Gm01_92502_A_G	Gm01	92502	A	G	TCCCAACGATCAGCAATAAATACCGGTCTATAAGATTCCCCAACATTCAATTATCATAGC[A/G]TTAACATTGCAGCCCACAAAAACCCAAGGAGAATACATTGCTATTATTCCTCATTGGTAT	Y	B	0.965	0.80095	Y	Intron	0.346	0.078	0.204301	0.13	0.439
BARC_1.01_Gm01_96941_A_C	Gm01	96941	A	C	AAGTGGTCTTGCTTCTATCCACTTGGTGAAGTAGTCGATGTCGACTAGTAACTATTTGAC[A/C]GCTCATAAGGCTTTTGGCAACGGTCTCAGTGTGTCCATTCCGCACATGGCAAAGGGCCAA	Y	C	0.824	0.63448	Y		0.335	0.078	0.198925	0.229	0.217
BARC_1.01_Gm01_98352_T_C	Gm01	98352	T	C	TTCTTTCTTTTCTTCATTTTTTTCTTCTTTCTCTTCATCATTTATTTTTTTCTCTCTCAA[T/C]TGATTTTCTTCTTCTTTAGCTAGTAGCTCTTGCTCATGACTATTCCCCCTTTCATCTTCC	Y	B	0.768	0.63744	Y		0.342	0.078	0.203209	0.132	0.435
BARC_1.01_Gm01_125218_C_A	Gm01	125218	C	A	ACTGCTGTCATTTGGTGGCTGCTGTTACTTTCTCTCACTCTATTTCAGAGAAATTATATA[C/A]GAAAAACTATCTCTTCGGGTATCAACATCCTGTGATAAAATGTCACCACTGATTGCATCA	Y	A	0.889	0.889	Y	Intron				0.035	0.035
BARC_1.01_Gm01_138835_A_G	Gm01	138835	A	G	AGCTAGTGTTGCATTCCATGCTCCTCGTCTTACACTCCAACAAGTTTGCAGAAAGTTTGT[A/G]CAAAAATCCACTCGGTAGCATGGACGAGCTGCACGAGTGAGCCAAGGGTTACATATAGAT	Y	C	0.842	0.64834	Y		0.448	0.274	0.410811	0	0.395
BARC_1.01_Gm01_148481_T_C	Gm01	148481	T	C	AAACTGGGAGAGAGTGGAATATAGGGAGAGAGCCAATCCCTGAGAGTGTGCACGAAGAGG[T/C]GAAGGAGTCTGAGTGGACGACCGTGAGTCATAGGAAGCCTCGGAACTTCCCACCACGTCG	Y	C	0.949	0.73073	Y		0.346	0.078	0.204301	0.142	0.433
BARC_1.01_Gm01_149508_G_A	Gm01	149508	G	A	CGTCGAACACATGCAGAGACTCGACCGTGCCCGAGTCTTGGTTAGAACTCCTCGACCACC[G/A]CTAATACAACAGGTAGTAGAAGTTCATGCCGGAGGAGAAACTTACCGCGTTCACTTGGTG	Y	B	0.842	0.69886	Y		0.335	0.078	0.202128	0.305	0.24
BARC_1.01_Gm01_153686_G_T	Gm01	153686	G	T	ATGTACCCCCAAGGACTGCGATTTTCTCTTGGAGACTTATCCTAGATAGGCTGCCCACTA[G/T]AGGAAATCTCCTTCGTAGAAACGTGCAGATGCAGGACACTTCTTGCCCTCTGTGTGGGAA	N	D	0.468	0.31356	Unknown
BARC_1.01_Gm01_166873_A_C	Gm01	166873	A	C	ATTCGAACTACCTTCACTGGAAACAGCAAATCGAGCCAGTGATTAAGTCTCACAAGCTTC[A/C]ATAATTTGTTGTGAACCCTTCGATTCCTCCTCGTTTTCTCTCCGGTGAAAGATCATGACG	Y	B	1	0.83	Y		0.232	0.057	0.138298	0.052	0.116
BARC_1.01_Gm01_183522_T_C	Gm01	183522	T	C	AAGCAAAAACTCAAACGAAGTAACACTAGCATCACGATTGGCAATGGTGACGTATCAGGG[T/C]GGAATCTGCGGTTCAGTGAGAAGATGAAAAAGACGACGCCCTTTGAGAACAAGTTTAACC	Y	B	0.9	0.747	Y	Intron	0.339	0.068	0.197861	0.134	0.429
BARC_1.01_Gm01_185356_C_T	Gm01	185356	C	T	AAGTTGCAATCCCATTTAACTCGTCTAGGAGCTCCTCAATCACTAGAATAGGAAACTTAT[C/T]TGGGATTGTAGCTTTGTTGAGAGTCCGATTGTCCACACGGAACCTCCAACTTCCATCCTT	Y	C	1	0.77	Y	Intron	0.232	0.057	0.138298	0.116	0.137
BARC_1.01_Gm01_186315_A_G	Gm01	186315	A	G	ACATGCCTTTGTTCCTTTTCCACTATCCATAATATAGACATTGCCTCCACTTTGTTTTCT[A/G]CCAATCTCATCAAGGTTTTGGCCGAAATTGTAGACTTAACCAAGCTGGGATCCCCTTGTA	Y	A	1	1	Y	Intron	0.342	0.068	0.198925	0.151	0.428
BARC_1.01_Gm01_225650_G_A	Gm01	225650	G	A	CTGCTCCCAGTCGGAGTCTAGTATGCATGACAAGAAGGACCATATCCCTTCCGCTCTTAA[G/A]CCCTGCGCCATTCGATCTAGCTCCTCCATCCCTATTTGCTGCGTGTCCCGATCCCCAACC	Y	B	0.8	0.664	Y	CDS	0.339	0.079	0.203209	0.174	0.421
BARC_1.01_Gm01_234280_T_C	Gm01	234280	T	C	AGGCCAATGCATCAGAATAGGCTCAAGGAACTTGTGTAGAGATGCCCAAAGAATATCCTG[T/C]ACAAGTGGGTGAGGATAGTACAAATCTTCCTGCACAAGAGCAAAGATAGTCTACTTGTAA	Y	D	1	0.67	Y	CDS	0.342	0.068	0.198925	0.13	0.435
BARC_1.01_Gm01_237375_G_A	Gm01	237375	G	A	ATCCTCAATATCCTTAACTCCGACTTTGGGCAAGACTTCACGTGTTGGGTTCTCTCTTGC[G/A]AACTAGGTTGTTTTATATGAAAGATCATTGAACTTAATTGGTCAATTTTCTTAAAGAGAA	Y	B	0.781	0.64823	Y	CDS	0.342	0.078	0.203209	0.029	0.466
BARC_1.01_Gm01_238408_G_T	Gm01	238408	G	T	TATCGCTAATGGGAATACAAGATGAAGAGCAAGAGAGGGAAGGAGAACGATCTACGGCGG[G/T]GCGCTCGCATTTGGCGGCTTTGGTGGGTGCGATAGATTGCTCCTGTGAAACATTGCGCGA	N	B	0.738	0.61254	Unknown
BARC_1.01_Gm01_243024_T_C	Gm01	243024	T	C	AATTTGATGTGTGGAAAAGATTCTACCTCCATTTTCCTAAAAGTGACTCATTAAAAACTT[T/C]AATATTTTCACCCCAAGACCTCCCAACTTCTTGCTCGTACATATATCCTCCTATTTCATA	Y	C	0.809	0.62293	Y		0.359	0.226	0.286486	0.465	0.355
BARC_1.01_Gm01_244270_C_T	Gm01	244270	C	T	GTACCTCTTCGAGCGTGCCGGTTACAATTCTTGTCCTTCGTCGCCAATGTCGTGTTGCTT[C/T]TCGTTGTTATTTTTTTTTTGGGCCAAAGCTGCTAACCTTCTCAATAGACCTCTTCCTCCT	Y	B	0.709	0.58847	Y	CDS	0.141	0.021	0.0744681	0.359	0.175
BARC_1.01_Gm01_245175_G_A	Gm01	245175	G	A	GAAGAAGTCGAAGTTGGTCAAAGATTTCTAGAAGTTTCTGTTTTGACCGATGCATTTCCG[G/A]CATGTTTAGCTATATTCCAAGTTTTCAGATTTTTTTCCTTTAATGTTGATGTATTGTATT	Y	C	0.503	0.38731	Y		0.298	0.079	0.182796	0.389	0.258
BARC_1.01_Gm01_257573_C_A	Gm01	257573	C	A	ACAGCAAATAGCTCTGGTAATCTGAGTCATTGGTATCGCCACATTTCTAAAGGTGGTTGG[C/A]CTTTCTCAACTGCAGACAATGGTTGGCCTGTATCAGATTGCACTGCAGAAGGTTTGAAGG	Y	D	0.842	0.56414	N	CDS
BARC_1.01_Gm01_281790_T_C	Gm01	281790	T	C	ATTCTTGCCTTGAATATCCTTTTGACACACACAAATACCATATAACTAACCCACAATATT[T/C]CTGACTTATATGGGTGCAGCGGATCATTTGAGCGAAGCTGTGGGCGACAACGAATCCAAG	Y	A	0.854	0.854	Y	Intron	0.151	0.49	0.328042	0.151	0.275
BARC_1.01_Gm01_283678_T_G	Gm01	283678	T	G	TTGGAAGCACAGAAGAGAATGAGTCTGCAGATGGAGAGGAAGAAGCCTGAGGAGAAGACC[T/G]TGAGTAGTTTTGGACACACTGCGAGGTACAGAAGATACACCATTGAGGAAATAGAAGAGG	Y	A	1	1	Y	CDS	0.042	0.49	0.263158	0.081	0.206
BARC_1.01_Gm01_293224_T_C	Gm01	293224	T	C	GGTATATGTCCTCATCCGCTGAAACTGTGCTGGTGGCAGAGGTGGCAGAGGTGGCAGTGG[T/C]GGTGCTGGTGGTGGAGCCCATGGACCACTATTCAAGAAGTTACTATCATCTATTGTGGAA	N	B	0.878	0.72874	Unknown	CDS
BARC_1.01_Gm01_303231_T_G	Gm01	303231	T	G	TGCTTAGAAGGGAGCACCATGCAAGCATTTCGCCTGTGAGGATGCTATTTTAGAAGGGAG[T/G]TCCCGAGACATTTAATCAAAGCCACTTACTATTGACTGTTTTATCTAATTCTGGTACAAG	N	B	0.976	0.81008	Unknown
BARC_1.01_Gm01_321874_C_T	Gm01	321874	C	T	TTCAAATCTTGTTAGCAAATATACATATTTTATTTTTAGTTGGAGCAGAATATTTAGGAT[C/T]AGATATCAATTATATATATATATATATATATATATATATTCTTTTTTTTTTCTTGCTTTG	Y	C	0.612	0.47124	N	Intron
BARC_1.01_Gm01_334575_A_G	Gm01	334575	A	G	ATGTAATCTATGGACTATGGCAACAACAAAACTCAGAGACGCTACGTCCATTACACTTCA[A/G]CTTGGACAGTAAGTTAGACATCAACCAGGGGCCAAATTCTTGATGAAAAAAGCCTGCACG	Y	B	1	0.83	Y	Intron	0.284	0.079	0.179894	0.13	0.417
BARC_1.01_Gm01_336090_A_G	Gm01	336090	A	G	CTGATCATCAGGGTCACCAGGTTGGCCCTGATGATTCTCAAATCACTCAAGCCGTTGCGG[A/G]AATTGATGCCATTGTGGGGAGACTCATTCAGGGTTTGGAACAAAGAGGTGTTTTTCAGGA	Y	C	0.9	0.693	Y	CDS	0	0		0.109	0.036
BARC_1.01_Gm01_367189_G_A	Gm01	367189	G	A	TTATTTGTATTTGAAACTTATTTATAAACTTGTATTAAAATAAATGTTGGTTGTTATTTG[G/A]CATATTAGGTAATTCATAATAATCATAATTTTAAATTTAAAATATTAAGTGATTAAATTA	Y	B	0.413	0.34279	Y		0.253	0.09	0.170213	0.053	0.43
BARC_1.01_Gm01_368192_G_A	Gm01	368192	G	A	CACAAATCAGAAAGCAAGATTTCAAAAAATTAACGAGATCATGATTTGGGCCGCAACATC[G/A]AGGTTTTAACTGTCTGTGACAGTAATATCAGTTGCATTTGTCTGGGATATTAAAACCTTG	Y	C	0.965	0.74305	N
BARC_1.01_Gm01_377284_C_T	Gm01	377284	C	T	CAATTATCAGTGTCAGGGCGTGAAATTCACAAGCTTGCCCCTAACTGCATAGTGGTGGTT[C/T]ACCTTGGACAAGCTCAAAATGTGAGAGCACGACTACAGCGTTACGGTATGACTGGGGCTC	Y	A	0.996	0.996	Y	CDS	0.258	0.089	0.169312	0.451	0.267
BARC_1.01_Gm01_378771_A_G	Gm01	378771	A	G	AGCTATAATCTCCTACCTCGAGTATTCAGCTTTATCAGTTTAAGAAGTCCGGACACTTTA[A/G]TCCCTTATCATCTTCAGTGTTCGATATGCGTCAGCGACAGTGTTGGACATCAACACAACA	Y	D	1	0.67	Y	CDS	0.213	0.426	0.315217	0.307	0.323
BARC_1.01_Gm01_382218_A_G	Gm01	382218	A	G	AAGGGTCAATTAATCTTTTATTTATAAGTACATGATTTGTCCTAACTAAACAACATACGC[A/G]ATGTTTCTTCAAATGATGAAATGAATGAGACCTGAATCAAAGGGGTCATTCCTTGGTAAG	Y	D	0.841	0.56347	Y	Intron	0.216	0.432	0.320856	0.393	0.423
BARC_1.01_Gm01_388778_G_T	Gm01	388778	G	T	ACTCTGATCCCTCGATTCTCAAGGCTCAGCAGCCAATCTAGTAAGTAAATTAAACACAAG[G/T]AATTGATGAAATATGTTAGGTGTATAATGCATTGAGCACAATTTCTCCAATCCAAAATAT	Y	C	0.9	0.693	Y	Intron	0.036	0	0.0157068	0.432	0.157
BARC_1.01_Gm01_402061_A_C	Gm01	402061	A	C	AAGCAACAATCAAACAATGAATATTTTAAGAACTTATTTATCATGTTCTTATGGAGGCCT[A/C]CTAGGGTAAGTCGTGACTGTATAGCATAGAAAATAAAGCTGCAGGAGCGTGGTATATCTT	Y	A	1	1	Y		0.245	0.432	0.333333	0.304	0.332
BARC_1.01_Gm01_405304_T_C	Gm01	405304	T	C	AAACCTAGCTTGGACCATATGTATCATTAAGCATCAAAGAGTTATAGCATGTGGACACGG[T/C]TGGGCCACGTTTTTCGGCTTTTCAATTACAGTAAGCATTAAGACATTAACAACGAATTTT	N	D	0.9	0.603	Unknown
BARC_1.01_Gm01_409172_A_C	Gm01	409172	A	C	TTGATTAAGAACTAGTCTTAGATTCAAATTACTTATGTGCATTCTGTTTTCTTTTTTAAT[A/C]TTTGCATTGGTATTTCATTAATCATTAGCATATTGGATTCGGAAATCACATAGTTTACAA	Y	B	0.858	0.71214	Y		0.219	0.432	0.320856	0.081	0.248
BARC_1.01_Gm01_423351_C_A	Gm01	423351	C	A	AGAGCTCTGAAAATGGGACAGGATCTAAGCCTGGATCAGCCAAAAACAAAGCATCCGAGC[C/A]AATTTCAGAACCTAATAGATCCTTGGATGGGGAAATTTCGAAATCATCTGCAAGGGTGCA	Y	B	0.897	0.74451	Y	CDS	0.255	0.089	0.168421	0.125	0.158
BARC_1.01_Gm01_429794_G_A	Gm01	429794	G	A	TCTTCTTTATACCATCTTTTTTTCTGTATATTTGTTAATTGAACCCACGCTTCAATAATC[G/A]CCTTATTTATTAATAAGTTAATTGCTTGGTACTAAAGTGTTTAAAATTGTTATTAACCAA	Y	D	0.858	0.57486	Y	Intron	0.216	0.447	0.327957	0.458	0.376
BARC_1.01_Gm01_432775_C_A	Gm01	432775	C	A	GTTGACTCTGCCACAAACGGAATACAGCGTGATGAGCTTGGCCTTTAAAGTGGGGTTCTC[C/A]AAGACTCTGTTTTGAGAACGAAGCAAGTGCAAGTGGAGTTTTCGGCCATGTTCCAAGGAC	Y	D	0.878	0.58826	Y	CDS	0.218	0.419	0.315217	0.297	0.456
BARC_1.01_Gm01_434813_A_G	Gm01	434813	A	G	TCACGATTTTGATCGTTTCAGGGAGATCGGCTGACGAATCGAGAGGATCTCATCGCTCGC[A/G]AGGGATTAGGGTTTCAATCGATCGCATCACATATCACAATCATGTTTAGCCGGATGTTCG	N	D	0.9	0.603	Unknown	5UTR
BARC_1.01_Gm01_439582_A_G	Gm01	439582	A	G	GGATGTGGCTGAGGCTAAGGTTGATTGGTTTATAAGGAGGAGAGAAGGGAGTGAGAGAGA[A/G]AAAAAAAAAACTGAAGATTGCTTTGGTTAAGAGAATCTTGGCAAAGCTGAAGACACTCTG	Y	D	0.9	0.603	Y		0.224	0.432	0.324468	0.206	0.289
BARC_1.01_Gm01_452642_A_G	Gm01	452642	A	G	GCTTGAAATTGGAATCCCCTAGTGATACTAAAACATTTGTGGCCCCTCCAAGACAAGTCT[A/G]CGACGAAGTTTATAGTTCATCTGAAGCATTTTCCTATGATAGTGAATCTATCACCTCTCC	Y	C	0.9	0.693	Y	Intron	0.224	0.432	0.324468	0.451	0.372
BARC_1.01_Gm01_453535_T_G	Gm01	453535	T	G	GTCCTAACAGAAATAGAACCAATTACATTATCCCTAATTAAATATTCTATAAATCTGATT[T/G]GTTAGCTAACCTCCAGCTAGCTACCCTTGCTCATGTTCATGTACATACCCGCATGGTATC	Y	D	0.609	0.40803	Y		0.242	0.43	0.336957	0.31	0.328
BARC_1.01_Gm01_458882_G_A	Gm01	458882	G	A	CGTACATTATTTTACCCATATATAATTAGCTAATGTAGAATATCCAACATAAGGTGCCGA[G/A]GTTTATATATATATATATATATATATATATATATATATAAAAGATAAACCTCCAAATGGA	Y	B	0.899	0.74617	Y	Intron	0.247	0.089	0.164021	0.324	0.22
BARC_1.01_Gm01_465402_T_C	Gm01	465402	T	C	ACTCTCATCCCAAACATCAAAACACTTCACCCCAGACCGAACCGGTTGCTGAGTTGGCGT[T/C]GTTGGAAGGCTTAAAAAACCCGGTCGGAGTACCGATCCCCTCGGCGACCCGACCGACACG	Y	A	0.854	0.854	Y	CDS	0.432	0.198	0.379679	0.413	0.397
BARC_1.01_Gm01_469387_T_C	Gm01	469387	T	C	GTCACCGGTCATTTTAGCCCCTCACCACGCTCTTATCGTTTCCCCTTGCCCACCGTCCCT[T/C]TTTTTTTCTTTTCTTTTGTCAATATTTTATTTTTAAAACAAAGACAAGATACATCAAGTA	Y	B	0.789	0.65487	N
BARC_1.01_Gm01_471125_G_A	Gm01	471125	G	A	ATTCCTATACTTTACTCCTCTTCCGATCGGACCTAGATTGATCCTTCAATTAGCGGATTC[G/A]ATCCCATCATCTTCAGATACCTGTCCTGAGGCCGACAAAAACCAATTACGTACTGAGATC	Y	B	1	0.83	Y		0.469	0.479	0.494681	0.151	0.391
BARC_1.01_Gm01_472038_C_A	Gm01	472038	C	A	ATAGCATACTACCAAACATGATTGTTGTTGACGGTTAGAGGAGAAAGACTGGTGGTGGCA[C/A]GAAAAAGCAAGAGCAAGAGCGTATTTATACTTACGTAGTGAAGTGGATGTCATAAAATGT	Y	B	1	0.83	Y		0.221	0.442	0.329787	0.234	0.301
BARC_1.01_Gm01_477469_G_A	Gm01	477469	G	A	GTCGGCAGCATTGCACAATAAGGCAATAGGGTGGAAGGAGAGGCATGACGACAAGAGGCA[G/A]AGGAGGTCATCGAGGTGATTCTACGAACATGGTTGAAGAAGATCAACAAGGGAAAGTTGG	Y	B	1	0.83	Y		0.282	0.495	0.392473	0.456	0.416
BARC_1.01_Gm01_488836_C_T	Gm01	488836	C	T	GTATTTATATATTTTTCTTAAAAATATATGTATGGCAAGCCGGCATGCCAACCTGCCTCA[C/T]CTTGTTGTTGGCATGTCGGGTTGGCAGGTTAGGCGGCATGGGGACAATGTGGGCTGTCAA	Y	A	0.9	0.9	Y		0.052	0.068	0.0575916	0	0.061
BARC_1.01_Gm01_510342_G_A	Gm01	510342	G	A	ATGGTTGTGGTTGTGTCTCTGCCTTTGGTTGTGGATGTGTCGGTGCATATGGCTTTGGTT[G/A]TGCCTCTGCCTCTACCCCTGCTACATGTGGTTGTTGCGTCGAGCCAAGTCTGCATCACGA	Y	B	0.996	0.82668	Y		0.5	0.479	0.489362	0.109	0.366
BARC_1.01_Gm01_512110_G_T	Gm01	512110	G	T	AAAACAGAACTTGAGAATGATACCAATATAATATTAACTATTAAGGATTTAAGGGTGTGC[G/T]TCCAAATCCAATCCAATTCATGAGTGAGGCACCCAAACCCGACTCATATGAACTGAACTG	Y	D	0.9	0.603	Y	5UTR	0.125	0.432	0.275132	0.091	0.217
BARC_1.01_Gm01_554008_A_C	Gm01	554008	A	C	AACAAGTCATAGAATTGGCCCAAAAAGAAGCAATACGTACATATGGACAAAAACAACGTA[A/C]TTGCTTTGTGCACCCAGCATAAGATGGACAATTCCAATATTACCCTTACATAAAGCTGAT	Y	B	0.868	0.72044	Y		0.263	0.5	0.380952	0.261	0.499
BARC_1.01_Gm01_565991_A_C	Gm01	565991	A	C	ATTGGGCTGGGTCTTTTTCAATGTTTACTGTTTTCTTGAGCTTTAAGTCTCTTAATCCCT[A/C]CCTTTTATAATTGCAAGTCATGAATAGAAAAAACATCAATTCTTAACAATTAAGCGTGAA	Y	A	0.899	0.899	Y		0.324	0.363	0.480874	0.189	0.389
BARC_1.01_Gm01_569667_G_A	Gm01	569667	G	A	GATGATACCAATAAGCAAATGAAAATGGACAGAAAAGGATAACAACTAAGCCACGACGTC[G/A]CGAGAGTGAAGGCATGAAAAGGAATTGTGAGCTGGACTAAGCATGTGCTGATTGATGGTT	N	B	0.897	0.74451	Unknown	Intron
BARC_1.01_Gm01_571178_G_A	Gm01	571178	G	A	ATTCTCCTGAATCTGGAAAACCACCGGGCTACACTCCGGTTCGCCACCGAACTGGAACAC[G/A]AACCGCGGGTCCGGTTCGGACCGGACCACAATGTGAACCCGAGGCGCAGGCTTGTGCTCC	Y	B	0.75	0.6225	Y	CDS	0	0		0.146	0.048
BARC_1.01_Gm01_580814_G_A	Gm01	580814	G	A	TTTCAATTATTTTAACCGTTAATTTTATTAAATATTTATAATTTAATAAACTAACTTCTA[G/A]CTAACTCTTTAGATTATATATGTTTAGCAAAACTATATAAAAGAAAGCTAGAGATCGTAA	Y	C	0.662	0.50974	N
BARC_1.01_Gm01_595259_T_C	Gm01	595259	T	C	GCATCACGTGTTTGGGGAGATAATCCTAACCGCCACTGAGAAACTCCACCCTGATGCCGC[T/C]GATAATCCCATCCCGTCGTCATAGCCTCTGCCTGTGATGAGTTTGCGTATGTTGCAGAGA	Y	A	0.976	0.976	Y	Intron	0.353	0.109	0.224599	0.218	0.42
BARC_1.01_Gm01_599126_G_T	Gm01	599126	G	T	TTCTTATCCGATCGCAACTTTCCAATCGCATTCCAACACGCACGCACCCAGAGATTCAAC[G/T]TACGTTACAAGGCAGAAAAAGTATTTTTAAAATTGTTTGCGTGAATCCCTAAATTACCCT	Y	C	0.899	0.69223	Y		0	0		0.042	0.014
BARC_1.01_Gm01_628702_A_G	Gm01	628702	A	G	CTCTTGATACTTACTATGACAAAGTCACTTGCTCTTGCTCATGTACCAAGGGACCCAATT[A/G]TGGGGCTTGGAATTATCTAACACATAAGACATATATCCTCTGATGAAATTTCTCTTTTTA	Y	C	0.9	0.693	Y	Intron	0	0		0.145	0.048
BARC_1.01_Gm01_683066_T_G	Gm01	683066	T	G	ATCAGCAGCTGCCGCCGTGGCAGCAGCAACTGCGATGGCGTGCTTGTTTTGCTCCTTCTC[T/G]GTGCAGAATGATTGTAACCAAGCAGCCTCAGCTTGAGAAAGGTTGGGGGGTATAGTCCCT	Y	B	0.854	0.70882	Y	CDS	0.253	0.099	0.173684	0.453	0.269
BARC_1.01_Gm01_688663_A_G	Gm01	688663	A	G	TTTTAATTATCAAATCAAAAGGTTAATTAATTGGTTGTTGAGTTAATTTGTACATTAAAC[A/G]AACATTTCCCACGGAAACTGTCCTGTTCGGGGTCTCGTAGACAAGAATTTATCTTTCCCG	Y	A	1	1	Y		0.383	0.135	0.255319	0.044	0.486
BARC_1.01_Gm01_700280_G_T	Gm01	700280	G	T	GCAGAGTCAACTTGCTTTACAATAATTAATGACATCCCCATAGGCAGAGACTTTAAGTTT[G/T]CATATTATAAAGGATAAATAATTATTTTTCATCCTTGAATGTATAGGACGCTCACAAATT	Y	C	0.935	0.71995	Y		0.339	0.109	0.218085	0.234	0.411
BARC_1.01_Gm01_707917_A_C	Gm01	707917	A	C	TCCCACGCGCGTAGACACCGCAAGCCCCAGCGAGGAGGGAAAAACGTAGATCAAGGACGT[A/C]GTCTGGATTAAAATCCCCATAGCCGCCACGCTGGCAGTGGGGTCCACCAACAACCCACAC	Y	C	0.877	0.67529	N	CDS
BARC_1.01_Gm01_755860_A_G	Gm01	755860	A	G	CAGGGTACTGCCCCGCACCCTACAAGGGGCGGCCTCCCTTTTACCCCTGCCCGTTGAGCA[A/G]GAAACATGACCCCCATGTACTCTGCGTAGAGTGTTAATTCAAACATATTTTAGTTGGTGT	Y	A	0.889	0.889	Y		0.342	0.2	0.269841	0	0.272
BARC_1.01_Gm01_769779_A_G	Gm01	769779	A	G	ATTGAATAACATCTTTTGATGAGAGATATGAACAAGAAGCTTTAGGTGTTTTCCTATGAA[A/G]CCAGTAAACAAACATCTAATCCATGGATATTTGAATCTGAGTACTTAATGATTGCATGTC	N	D	0.577	0.38659	Unknown	Intron
BARC_1.01_Gm01_787179_A_C	Gm01	787179	A	C	GAACTGGCACAAGGTCACTTCACAATCATGAAGATCATGGACAAGAACGTGCCACTAGCA[A/C]CCACCATAAAAGTTGGAAACAGTGTTCAGTGGCCTCTAACGAAAGATGAGCCAGTGGTGA	Y	B	0.9	0.747	N	CDS
BARC_1.01_Gm01_790446_C_A	Gm01	790446	C	A	AGTGTGGGTTAGAAGTTATGTTGTTAGTAGTCCTCTTGTCAATATATAAATGTAATATTA[C/A]ATGGATCCTTTGGCAACAGGTTTGGGGAAGAAGCAGGGGAGGCTACTGAGCATGTGTTTG	Y	A	0.771	0.771	Y	Intron	0.219	0.161	0.47541	0.452	0.495
BARC_1.01_Gm01_801585_A_G	Gm01	801585	A	G	GGACTATCTAATTAAGACCTCATTGGATTTTAAAGATTAATTAAAGAATTGAAAAAACAA[A/G]CATACAAACAAATGAAACGAGAAGCACAAAATCATCTTTAACAACCCCACAAATCACAAT	Y	C	0.965	0.74305	Y		0.073	0.063	0.0677083	0.092	0.076
BARC_1.01_Gm01_807583_A_G	Gm01	807583	A	G	AAGCTATAACTTTAGCACCACCTTAGATGCTTAAGCTACATAAGATTTTAAATATCGGTC[A/G]CGTTGTGGTTTCGTCACGTTTGCTGATATTGTGGCAAATTGCAAACAAATGTTGTTGATA	Y	C	0.935	0.71995	Y	Intron	0.416	0.279	0.345745	0.479	0.414
BARC_1.01_Gm01_822979_A_G	Gm01	822979	A	G	CTTACTGGGTTTGTCCATCAAATGTCCACCCAAACATATGGTTGATTATGTTTTATAAAT[A/G]ATTAAAAGAAAATAAATATAATTGTATACAAGTATAGATATAGATGCGGCTAATGTTAAT	Y	C	0.772	0.59444	Y		0.198	0.365	0.414894	0.126	0.325
BARC_1.01_Gm01_832169_T_C	Gm01	832169	T	C	GTTCTATGTTAGTATTTTACACGAATTGTTTCATATGATAAACAGTTAAATATCATGGAC[T/C]TTTTTTAAAAAAACAAAGTAAACTGAATTTTATCATTAAACCAAGAAGCCACAACCAGAC	Y	C	0.689	0.53053	Y		0.224	0.078	0.147368	0.221	0.176
BARC_1.01_Gm01_849807_A_C	Gm01	849807	A	C	AAAGTACAAAATTCAGATTCAGATGATATACATATAATTATTTTTATTTTTAACATATCA[A/C]CCAGGAAAGCTTCAAAAGCACTCAATACAATCATAGAAATAAATTAGGTGCTCCATAATG	Y	B	0.935	0.77605	Y	Intron	0.266	0.089	0.173684	0.417	0.257
BARC_1.01_Gm01_861723_A_G	Gm01	861723	A	G	AATACCATAAAGGTATTTTCAACATTTTACAAAATTACTGGGTGCCCAAGCAATTCCCTT[A/G]ACTTGTTTGCTTGGGCTTCGGCCCATGTAGTTTATCAAAACCAAAAATAAATAAATTGGA	Y	B	0.965	0.80095	Y		0.073	0.073	0.0729167	0.021	0.056
BARC_1.01_Gm01_874910_G_A	Gm01	874910	G	A	AAAATGGGGTGCAGGGAGAAATTTGTGAAGTATAAAAAGTAATGGCCTTAAAAAATTAAT[G/A]CCAGCAACAACAGTGTGACACACATCCTTTTCAGTGGGGTGTGCAAAGAAATCTAGTTGG	Y	A	0.996	0.996	Y		0.474	0.109	0.311828	0.146	0.264
BARC_1.01_Gm01_889229_A_C	Gm01	889229	A	C	TAGTATAAAAAGTTATCATACGATTCAGTTATTTGTCCAGTAATATTTTATTTATCCTGT[A/C]TTTTTAGCAGATTAAACACACCCTTAATGAGTGGAAATGATTATATCAAGTTTTGTTATC	N	A	0.689	0.689	Unknown
BARC_1.01_Gm01_901691_C_T	Gm01	901691	C	T	AGCAGAACAAGTTTGGCCTCTTTTGGAGGATTTCTTTGGCCTTGACAAGTGGTTCCCCAC[C/T]CTCTCTACATGCATTCCAGTTGAAGGTATCTCTGGCCAACCTGGGTGTGTTCGCTTCTGC	Y	A	0.976	0.976	Y	CDS	0.362	0.321	0.478022	0.346	0.441
BARC_1.01_Gm01_921063_G_A	Gm01	921063	G	A	AGTATTGATGCGAACACACATCTGGGTTATATCAATTGAGTTGTCTCCAATAGTGGTTCC[G/A]ACATGGGCTTTCCTCCTCTGAGTCACTTGTGACTTTTCTTTTTTCTTAAATACACCAGTT	Y	B	0.9	0.747	Y	CDS	0.359	0.095	0.223404	0.234	0.414
BARC_1.01_Gm01_925493_T_C	Gm01	925493	T	C	CCGAACGGAGCTCCGGGAAGATCCTCAACCGAGTGAACCGGCATGCCGGCGCTTTGATTG[T/C]GCCTCTTTGCGGACATTGCTCGCTGACCCAGATAAGAAAATTGATGTGGGGTTGGGCAAG	Y	B	0.976	0.81008	Y	Intron	0.226	0.073	0.147368	0.443	0.248
BARC_1.01_Gm01_955547_T_C	Gm01	955547	T	C	GCTCCGGGAACTCAACTACAACGACCGTGACGTGATGAGTCTCTGGGTTGTTTCAATCTT[T/C]AGTGGCCTAATTTGGCTTGTTGGGGTTTTGCACATTGTCACAGCCATAGGAAGAACCACT	Y	B	1	0.83	Y	CDS	0.347	0.299	0.477778	0.429	0.496
BARC_1.01_Gm01_960736_T_C	Gm01	960736	T	C	AATCCTTGATTATTCTATTGTTCTTTCATTGTGAAACTGTGAATTGCCAAATAAATCACA[T/C]CATACTCATTGCCAAAATTTCCATCTCAATGCATGAGGTGCAAATAAATGACCAAAGCCC	Y	B	0.868	0.72044	Y	Intron				0.035	0.035
BARC_1.01_Gm01_963847_T_C	Gm01	963847	T	C	TATGAAGTTTTCAATACTTATTTAGCAACTTTAATGGTAAAGCCAATTAATTAAAAATAG[T/C]GAAATTACAAAATCAAACTAAAAATGAAACAGGGATGCATTGGATATATAAATCAATACA	Y	B	0.689	0.57187	Y		0.26	0.332	0.462366	0.478	0.49
BARC_1.01_Gm01_973781_T_C	Gm01	973781	T	C	CAGGCCACACATGCAGGACAAGTGGGAGCTATGGAACAAGGACACTCCTCTTGCTTGAGG[T/C]ATCGGAGTGTTGAACATGTTTCTGACACTGACACCTACCCAAAACTCAAGACACATTTTT	Y	B	0.854	0.70882	Y	Intron	0.125	0.031	0.0736842	0.438	0.196
BARC_1.01_Gm01_979625_G_A	Gm01	979625	G	A	CATAAGTCAAAATTAGATGTAAATAAACTCTTCCAATAGACCCTATATGCATAGCCTTCC[G/A]GTACATGGTGACACTATGCACCACACCACCTAGATGGGCACAACACATACCGTGTCACAT	Y	B	0.976	0.81008	Y		0.349	0.042	0.190476	0.124	0.425
BARC_1.01_Gm01_1006696_C_T	Gm01	1006696	C	T	TGCTTCGGATTTACGGTTCGTGCCCTTGCGTCGGTACACTGCAGCTTTCAGTGCGGTGTG[C/T]GAAGTGGGAACCGTAACAGAATTCACGTGACTCTCGCATGCGGGTTTATGACGTGGCGAA	Y	A	0.878	0.878	Y		0.5	0.474	0.486911	0.021	0.332
BARC_1.01_Gm01_1009248_G_A	Gm01	1009248	G	A	CACCACGAGTCCAAGGGGAACGCCGAGGAAACCAACGGCGATAGCAACAACAACAACGGC[G/A]ATGGTGCTAATCGCGAGGAAACGGCGACGGATGGGTCTGTTGTGGTCACCGGTAACAATG	N	B	0.834	0.69222	Unknown	CDS
BARC_1.01_Gm01_1011674_T_G	Gm01	1011674	T	G	ATAAGCGCCTAGTTGCTTTACTGGAAAAGTACCACAAATCTCAGAGGTATCTTTTCCTGC[T/G]GTTTGTTTCTTACATGTTTAGTTTTTCCACATGTTACTAAGAGCTTGTACCTTTTCTCAG	Y	C	0.842	0.64834	Y	Intron	0.422	0.396	0.486772	0.5	0.494
BARC_1.01_Gm01_1013695_A_G	Gm01	1013695	A	G	ATCCCCTTCAGTGTTATTGTCTCCAGTTCCGTCGTGAGGTTATAATACCTGCACATGAAA[A/G]GATATTTTAACATAAGGTCCACTTTGAGCTGTTTAGCCATGTGATTTTGCCCATTATGAC	Y	D	1	0.67	Y		0.5	0.468	0.484043	0.229	0.402
BARC_1.01_Gm01_1028956_A_G	Gm01	1028956	A	G	TTCATACACGTAAGTAGTTATCTACTAATGATGCTGTCATATTTCATTTTTTTGTGAGGA[A/G]GAAAGTCTTACATGTCTATCTCCTTTCCTATTTTAAATCCCGCCTTATTAACAAAATGAG	Y	B	0.841	0.69803	N
BARC_1.01_Gm01_1045893_G_A	Gm01	1045893	G	A	TCTTCCACCATTTTCTTTTTTCAACTTGTATTTTAAGTTCAACAGAATAAAGTTAGTTCT[G/A]TTGAATTGTAAAAGTATGGCTAACAAGTGGAGTTAAAGTATTAGTTAAAAAATTAAAATA	Y	B	0.765	0.63495	Y		0.344	0.218	0.278075	0.065	0.499
BARC_1.01_Gm01_1059407_T_C	Gm01	1059407	T	C	TATCCTTTGAAATTTCTTTACTTCATTCATCCATCTTCTTACTATGTTGGTTGACATAGT[T/C]TAATAATATCATGAACAGATTAAGAGCCTTATGGGGACAAAGGTGGAATGGCTTTACTAC	Y	B	0.868	0.72044	Y	Intron	0.344	0.214	0.275132	0.033	0.499
BARC_1.01_Gm01_1065157_A_C	Gm01	1065157	A	C	ATTGTTAAGAATGAGTTTTTTTTTTCTTACTAAAGGTGATAGAATGGGGAAACCCTCCTA[A/C]TAGTACGGGATATGATGTTAGTGGCATGTTGGGATTGTCAGCATGCCTATCTAGACAACT	N	C	1	0.77	Unknown
BARC_1.01_Gm01_1077129_C_T	Gm01	1077129	C	T	GCTCAACCTCAACCTCAACCTCATCCTCATTGAACCTCACGCACGTCAACCACATCGAAC[C/T]TGACGCACCTGAACCTCATCGAAGCTGACGCACCTCAACCTCATCGAAGCTGAGTAGTTG	Y	C	0.781	0.60137	Y		0.063	0	0.03125	0.244	0.099
BARC_1.01_Gm01_1101335_T_C	Gm01	1101335	T	C	AAAGGAAAATGACAATGATAGCCACATGGCATAGGACAATGGTAGGCCCAAGAGGTTCAT[T/C]AGGAAACCAGCTCACTACATAGACTTTGTCTGAAATTTACAAATGTTCCTTGCTGGCTAG	Y	C	0.996	0.76692	Y		0.266	0.203	0.231579	0.456	0.337
BARC_1.01_Gm01_1106898_G_A	Gm01	1106898	G	A	GATAACAGCATCTCTAGCGGTTCTTTGAGATTCCTCCAATTTTTTTCCTCTAGCTGCTCC[G/A]ATTGAATTCTTAAACGTCAAAGAGACAGAGAAGGGATTGAAGCCTCCACTTGTACTGTCA	N	D	0.436	0.29212	Unknown
BARC_1.01_Gm01_1110822_C_T	Gm01	1110822	C	T	TCACCCGATAGCTTTCTTTAGCCAACTCCTTTGCCCGAGGCTCCAACGGTTTTCTACTTT[C/T]GTCCGGGAACTCCACGCGATCACATCTGCCATCCGCAAGTGGTGGCACTATCTCCTCGGC	Y	A	0.897	0.897	Y		0.121	0.193	0.153439	0.059	0.126
BARC_1.01_Gm01_1170830_T_G	Gm01	1170830	T	G	GGAAAAGTATTAAGAAGTTGGAAAATGGACCTTGTCCATGACAGAGTAAAGGATGGCTCT[T/G]GGCAAGTCCAAGAGGTGCCATTTGCCCAGTGTCTCGGCGTAACCGAACCTTATGGCTTCT	Y	B	0.9	0.747	N	CDS
BARC_1.01_Gm01_1188499_C_T	Gm01	1188499	C	T	TGTCAAAGATGATATCTGATTACTTAACCATATAAAAACTTTTAGAATTACACTACATGC[C/T]AATCAGACTCTAATTTAGTTTCTTTGTATATAAAATATTATGAAGGGAAAAAATTATAAG	N	C	0.612	0.47124	Unknown	Intron
BARC_1.01_Gm01_1241762_A_C	Gm01	1241762	A	C	ACCAGTCCTTCCATGACTCCACAAGTCCCTCAAGTCTTGAGAACTTTGCTTCAGCACGAT[A/C]TTTTCTATACGTTCAATTTGTGGCCAATCATCACCCGTTTCAGGCTGACACCTTGGCATT	Y	D	0.842	0.56414	Y	Intron	0.12	0.193	0.152632	0.021	0.113
BARC_1.01_Gm01_1244765_A_C	Gm01	1244765	A	C	ATCCATCAAATCGTTCAAGTCGTTGACCTTGTCCTTGACCTCTTTCAACCAAAGCAGAAC[A/C]TTGGGGTCTAGGGAGTTGTTCTGCTTGGCCTTGTGAACCACGTCATTGATCTTTCTGAGA	Y	A	1	1	Y	CDS	0.12	0.193	0.152632	0.426	0.3
BARC_1.01_Gm01_1254891_A_G	Gm01	1254891	A	G	TAAGAAATAAGTTAGTGTAAAATACATTATCACTTATTTCTTACGACCACAGATAATAAT[A/G]AATTAAGAATATATTAGAAAGGAGAAAATATTAGGCAGATAAAATCAATCAGCATGTGTC	Y	C	0.662	0.50974	Y	Intron	0.167	0.031	0.0947368	0.237	0.146
BARC_1.01_Gm01_1275418_C_T	Gm01	1275418	C	T	AAAATCAATCATCTATACGGACGACACGGCCATATTTTCCACGTCCTCCACGGGTAGAAC[C/T]GTTCTTCATATTGCAGTAATTGCTGGGTACGAAAACATTGTGAGGGAGTTAGTGAAGAAA	Y	A	0.9	0.9	Y	CDS	0.328	0.052	0.181818	0.269	0.22
BARC_1.01_Gm01_1276375_T_C	Gm01	1276375	T	C	AGTTGCATGCAGACTAATATTGCTTCAGAACTTGTAGTGTTGCCAATTTTTGAGACACTT[T/C]AACTAGAAATCGAAGACTTATTAGTTGCTACAATATTCTTTTTCACATCACTTTCGCACG	Y	C	0.935	0.71995	Y	Intron	0	0		0.063	0.021
BARC_1.01_Gm01_1279146_C_T	Gm01	1279146	C	T	ATATGAAATATATCATATCATTGTAGAAGAAGGTTTTAAATATTGGTCGTGCTTGTGTTG[C/T]AATTTTGTCGTGTTTGTTTGTGACAAATTGCAAACAAATGCGATTGACACAATCCCAATT	Y	B	0.757	0.62831	Y	Intron	0.344	0.276	0.465241	0.463	0.495
BARC_1.01_Gm01_1282140_C_T	Gm01	1282140	C	T	CAGTGAATAGCTCATGAGGCTTCTTATCGTCATCATTTCTGGCTTCCTTACACTTGGGAT[C/T]CACAACTTCCTCCACCGCCTGCACTCATTTCATCAATGCAGGTATAACGAATTGATCTCG	Y	B	0.897	0.74451	Y		0.5	0.245	0.368984	0.332	0.364
BARC_1.01_Gm01_1302395_G_T	Gm01	1302395	G	T	ATCTCCAAATTATTTTAAATGGTTCAATTTAGTCCCCAAATTTTTAAAAATAAATCAATT[G/T]GTTCTACAAATTTTTGAAAGTTCATTTAAGTTCTCAAATTATTAAAAGTGAATCAATTTG	Y	B	0.558	0.46314	N
BARC_1.01_Gm01_1306252_A_G	Gm01	1306252	A	G	ATTGTATACTTTTTAAAAAATGAATTTTTAAAACTTTTTTATTAGATCATGGGCCGACCC[A/G]TTTAACTACAAACTTCATGAGTCAAATGTGAACTAAAAAATTTAGTTCATTTAATTCACA	Y	A	0.714	0.714	Y		0.286	0.043	0.160428	0.406	0.318
BARC_1.01_Gm01_1307763_C_A	Gm01	1307763	C	A	CTTGCTATTTAAGTTAGATTATCTCTCTGAAAAGAGGCATGCAGTGGTTGGTTGGTGCTA[C/A]TGACCGCCCGGCATGGCCTCTGTCTGCCCACTCTGTTGAGTGTCATTACCCACATGCTGA	Y	A	1	1	Y	CDS	0.255	0.042	0.147368	0.089	0.13
BARC_1.01_Gm01_1314111_A_C	Gm01	1314111	A	C	CTCCCATCACCACCATTGTCATTGCCTAACTATTTAAGTTTCCATTTTTACCCTTCCCAC[A/C]AACATGGTAGCACTAATGAGATGATGAAATTACTAAAGTTGAAACAGTTTCGTAATCACT	Y	A	0.832	0.832	Y	Intron	0.279	0.042	0.154255	0.434	0.302
BARC_1.01_Gm01_1315010_A_G	Gm01	1315010	A	G	TCAATGGCTGCAGGCCCTCCAATGTTCTGCAGCTGAGAGCTGACTAGCCACTGGTGCAGC[A/G]CTGCCATAAAACCTGCTCAATGCCCACACACCACCTAAATATCACTGCTCCAGTACCCAT	Y	A	0.708	0.708	Y	Intron	0.271	0.042	0.149733	0.422	0.247
BARC_1.01_Gm01_1319954_C_T	Gm01	1319954	C	T	CGCCGAGCTTCGACGTAAAATCGAGGCGGCGGAGAGTGAGAGCGAGACATTCTGGACTGC[C/T]TGCTCCACTTGCAGGCTCCTGCACCAGTTTGAGAGGAGGTACTTGGGGCAGGAATTGGTG	Y	A	0.834	0.834	Y	CDS	0.342	0.151	0.240642	0.279	0.26
BARC_1.01_Gm01_1340781_T_C	Gm01	1340781	T	C	ACTACATAAACAATACATGAACTATTACTTACTAGCGAGGACTTGACTTCTCTGTTATTC[T/C]TTTTCCAGTTATCTCTGCGTTGTCCTTTAAAATCCACACAATTTTAAAATTAAATCACAA	Y	D	0.965	0.64655	Y		0.237	0.224	0.22695	0.329	0.251
BARC_1.01_Gm01_1342929_T_C	Gm01	1342929	T	C	GGAAAATGCTGTTGATACAGTTGCAATTGTATTGCGGTGAGTCAAAATTCCTTGACATTG[T/C]GGCCGCAATTGATTGCAGAACACTATTTAAAATCATGGTATCAATGAGAACATGGTAAAA	Y	A	0.759	0.759	Y		0.405	0.224	0.308108	0.419	0.354
BARC_1.01_Gm01_1344976_A_G	Gm01	1344976	A	G	TTTATTCCAAACTATGACAACGTTGTAAGTCAAAGTACACAAAAAAAAATGTATAAAAAT[A/G]AATGTGCTAGGCTAATGAACAATGAGAGTTTTAACCACTGAGAACCTGAAGTTTAGCAAT	Y	A	0.988	0.988	Y	Intron	0.421	0.141	0.276596	0.133	0.481
BARC_1.01_Gm01_1349592_A_G	Gm01	1349592	A	G	TTAAATTTTATAATAATTTTTTAAAAAATACATATTTAAAATTATTTATAATTAATTAAT[A/G]ATATAAAGATATTTAGCATGAAGATTAAACTCTGCAAGCACGCGCCACTGCCGCTGATGC	Y	A	0.988	0.988	Y		0.274	0.239	0.252688	0.19	0.444
BARC_1.01_Gm01_1355473_C_T	Gm01	1355473	C	T	AAAATTAACCCTGACTGACCCAATACAAAATACCTTGTCATCCCTAACTTAGAAGAATTG[C/T]TCACTTCGAAGTAATGGGCCAGGGGTTGGCCCATAACTGTCCAGCCCCCTTTAGATGTCC	Y	D	0.988	0.66196	Y		0.052	0.421	0.235602	0.06	0.177
BARC_1.01_Gm01_1357243_C_T	Gm01	1357243	C	T	TTTGTAGTTGAAAATGTTTTGGTGTACGTTCCAACAGAAATCCAAAATATAGACGTAAAA[C/T]GAATGCAAAAGTAAGACTCTTGATCTCTTGGCAAAATGACTTTTGCCTCAAAAGCAATTT	N	A	0.988	0.988	Unknown
BARC_1.01_Gm01_1369371_C_A	Gm01	1369371	C	A	CTTATGAACAATTATTGTTTATATAAATAATTCCCTCTTATTTTAAACAACTCAAAATTA[C/A]ATGTGTCACATCAAAATAATATATTTTTTTTGTTAACAATCCATTAAATAACTCTCTCGT	Y	C	0.409	0.31493	N
BARC_1.01_Gm01_1378673_T_C	Gm01	1378673	T	C	CAGATAACTTTATCTATTTTTCAAGTTCAGATTGCTGCAGGCCAAAACAATTAGCAGACA[T/C]GAGCGGAGAACCCAAGGATACAGAATACTGGCTTTATTTACATAGATCATTTAGCTTGAG	Y	A	0.9	0.9	Y	Intron	0.305	0.042	0.169312	0.461	0.302
BARC_1.01_Gm01_1384724_A_C	Gm01	1384724	A	C	AATTTCCTAACACATTTTTCACAAATTCCCTGGAACCTAGCTTTTGTAGTAATAAGCTTA[A/C]TAAAAATACAAATGCCCAATTCAAAGATATAATGTTCGTGCACTAAAATTCAACTAATTA	Y	A	0.689	0.689	Y		0.303	0.042	0.169312	0.094	0.146
BARC_1.01_Gm01_1389979_A_G	Gm01	1389979	A	G	GGTGCAGGACATGGAGGCGCAGTCAGCATGGGAAGCGAAGGCGGCATGGACGGCGGAGTC[A/G]GCATGGTTGATGAAGTCGGCGTGGGTAGCGGAGTAGGCAAGGGTGATTGGTTGTGTTGCA	Y	B	0.702	0.58266	Y		0.089	0.443	0.260638	0.293	0.278
BARC_1.01_Gm01_1402462_T_C	Gm01	1402462	T	C	AGGTTGATCCACCTGTGACTCTGTTTGATGATTTTCTTCCAACTTTGACAAATTACCAGT[T/C]TCACCTGAATCAGGCACATCAGTAGCTGGAATATTCGTATCAGCATCCCTGTGTTCAATA	Y	C	0.9	0.693	Y	CDS	0.156	0.125	0.140625	0.06	0.114
BARC_1.01_Gm01_1405511_C_T	Gm01	1405511	C	T	CCGCGCTACGCAAAAGCACACAAAAGCAGAAATATCACTAACAGCAAAATATCCCTTTAT[C/T]CTAGAAGATACGATCCTATCCCAGTAGTGCGCTTCCTTCGCGCGCGACGTGCATGTCTAA	Y	B	0.738	0.61254	Y		0.083	0.426	0.25	0.124	0.211
BARC_1.01_Gm01_1407841_G_A	Gm01	1407841	G	A	TTTGTATAAGAAAATTGGATACCATATGCCCATGAGGTCTTGGGTCCTGTCCACAAGGAA[G/A]TTTAACTCATTTTTTACTCTTATATAGTACTAAGTAACGTCATATACATTGTAACAATAA	Y	D	0.662	0.44354	Y		0.074	0.419	0.244681	0.092	0.193
BARC_1.01_Gm01_1422373_T_G	Gm01	1422373	T	G	TAGCTATTTTCTTTTTCTGGGTATTCAGGAATTCAATTCGGACTTTCGTAGTTTTCATTG[T/G]TTCTTGAAAGGTTAATATTTAAAATAATGCCATTTTTTTTATAAAAAAAAGAAATATATT	Y	B	0.868	0.72044	Y		0.042	0.318	0.113208	0	0.149
BARC_1.01_Gm01_1424071_A_G	Gm01	1424071	A	G	ACTGTGGCTAGAGAAGAAGCTGGTGAGGATGGGGTGAGGTCCCCAACATGTTTATGTGAC[A/G]CCACGTGACGCCTCATGGTTCCAATACATCTCTGTCCTACCAAACTAACCACAGATACCC	Y	C	0.949	0.73073	Y		0.457	0.473	0.464865	0.231	0.437
BARC_1.01_Gm01_1428598_T_G	Gm01	1428598	T	G	GAGATATGTCAAACCTTTTTTTTTAAATCATCTTCATTAACTCATACCCATCCGAACTAT[T/G]AGCATATTACGATTGTCAACGGGTTTTGTTTTGCCATTGACGCACTGTGTGACACCTAAG	Y	B	0.732	0.60756	Y		0.332	0.141	0.229947	0.458	0.314
BARC_1.01_Gm01_1429712_G_A	Gm01	1429712	G	A	CGGGGAAGAGGACATGTTTTTTTTTGTTTTATAAGTCACAACACAGACACAAAGGACATA[G/A]TTATTTAGGTGAACTTGCACTTTTCATTAGGCATTTTGGTCAATTGAAGAAGTTCCCAGA	Y	D	0.809	0.54203	N
BARC_1.01_Gm01_1479342_C_T	Gm01	1479342	C	T	AAAATCATTTAGCAATCCATTGCTTTATGATTGACGCTTCTCTCTCTCTCTCTCTCTCTC[C/T]CTGTGACCACATTTTAGCATTGTGTTATTTCACATCTACGGGCAGTGCGGGCAAGAGAGA	Y	B	0.9	0.747	Y		0.073	0.484	0.275132	0.042	0.199
BARC_1.01_Gm01_1486278_A_G	Gm01	1486278	A	G	CTCCCCTCCCTGAAAGATACTACGATTGTGGTGCATATTATTTTAATATCAGTGGAGATG[A/G]ATGCAACAAATGCATGCATCAGAGTATTTGGAGTGACCTAAATGTTATATTTTGCAGTGT	Y	B	0.899	0.74617	Y	Intron	0.079	0.489	0.281915	0.037	0.204
BARC_1.01_Gm01_1487911_C_T	Gm01	1487911	C	T	ATAAGAGACAGCTTCATTGATGTTATTCTACTCAGCAAAACCAAAAGCTCCGTAGTTTGA[C/T]AACTAAGTGATGGATGCTGTAACATAATTAAGGACTTGTTGGTCACAAAACTGGTCATAC	Y	D	0.935	0.62645	Y		0.141	0.489	0.312169	0.345	0.326
BARC_1.01_Gm01_1490705_T_C	Gm01	1490705	T	C	CTCTATAAGGAATATCAAATGATGCCAACTGCTTTTGTTCTTTCAGAATAGATCAACCAG[T/C]CAGTTTTTACCATATCAAGAGAAAAATTAAAACAAGATTTTGGAAATATAAGGTAAAAAA	Y	A	0.841	0.841	Y	Intron	0.359	0.208	0.42328	0.34	0.399
BARC_1.01_Gm01_1494600_C_T	Gm01	1494600	C	T	GGGCAGGGCAGGGACGATTATGATATCCCCCGTCCCGCTCCCCAACATTATACCCGTCCC[C/T]GATCCCCGATTGGGCTATAATTTTATACCTATCTTTGTCCCTGTTCGGGGTCGGGTATTC	Y	B	1	0.83	Y	Intron	0.132	0.495	0.31016	0.411	0.348
BARC_1.01_Gm01_1497925_A_G	Gm01	1497925	A	G	CAAGATTTTCAGCTTCCAAAGCCACTTAAAGGGAGCTAGCTGTTTGGCATGGAGAGTATA[A/G]TCATTGGAAGCAAGCCATTTATAGGCCAAATTCGCAGTATAAGAAGAAGGGGCCTAAACC	Y	D	1	0.67	Y		0.488	0.103	0.310811	0.157	0.488
BARC_1.01_Gm01_1502816_G_A	Gm01	1502816	G	A	GTTCGAACCCCTACGAGAATTCAGGTACTCTGATGAAAACCTTCGTATTTTACAAAAACA[G/A]TTTTTTAAAAAGACATAATATATTTGACCAAAGGCAGTAAAAAAGGCAAAAGGTTCTAGG	Y	B	0.935	0.77605	Y	Intron	0.25	0.208	0.478947	0.108	0.386
BARC_1.01_Gm01_1512759_A_G	Gm01	1512759	A	G	CCATTGAACCTTCTCTCTATAACTTTTTCTCTCTCTCTCTTTCGATCTTCTAATATTCTC[A/G]AGTTGACGAATCTTTTTCCTGTTGCCCAAGTTTCTATTCCTCTTCTCATTGGCACTCCAG	Y	A	0.889	0.889	Y	5UTR	0.337	0.031	0.179894	0.313	0.228
BARC_1.01_Gm01_1517759_G_A	Gm01	1517759	G	A	AGCTCGTGAATATGGACATTGAAGAGGTTGTCTCAGCCGCTGGGGTTTGATTCATGTCAT[G/A]CGTGTGTGTGGGCGCTGTTGCTTGCGCGCATTCTTCTTGGATGTTCACGTTTCATCCACT	Y	C	0.9	0.693	Y		0.177	0.021	0.0947368	0.032	0.078
BARC_1.01_Gm01_1520839_A_C	Gm01	1520839	A	C	CTCTACTTTCTCTTTTGTCTTCTGTCCTACTTCCCCAGCCGCCTTAGAAACCTTACTAAA[A/C]GCGCCAGTTACCCAGGATGCCCCAGTAAGCACATAGCGATTCTTCATTAGGGCAGAGCCA	Y	A	0.854	0.854	Y	CDS	0.302	0.135	0.215789	0.174	0.206
BARC_1.01_Gm01_1524003_T_C	Gm01	1524003	T	C	GCGTCATTGAACGACCTGTCCCGACACGACTCACGATTTACGAAGGTGGACAACCGGTAA[T/C]GGGTCATAACATATAACATGAACGTTACGTAAATCATTTAATTTTTGCTATTGTACTAAT	N	B	0.732	0.60756	Unknown
BARC_1.01_Gm01_1525984_T_C	Gm01	1525984	T	C	ACGTGACCAAAAAAGCCTCATGTCTGCTCCGCTGGAACAAAAACGTGTGCCGCGGGTCCA[T/C]GTGGACGTGCCGTTAGTGAATTACATACAAGGAAGAAACTCCCTCACTGCCTCATCATCA	Y	B	0.996	0.82668	Y		0.229	0.438	0.394737	0.184	0.328
BARC_1.01_Gm01_1532784_T_C	Gm01	1532784	T	C	CACCTTAAAAATAACTACTCTTTGATATTTTACTTTCATTGTTTGAATGCTTTTTTTTTT[T/C]TTTTTTCTTAGAGCATTTTAAAAATATCCTTTTTTTTTCTTTTGCGTGGGATGAACTGGT	Y	B	0.487	0.40421	Y		0.104	0.011	0.0575916	0.113	0.076
BARC_1.01_Gm01_1535892_G_T	Gm01	1535892	G	T	CTGTCGAACATTCTGCTGCAGGTGGTCATCTCTATAGGCCCACAGAAATTTCAAAGAATT[G/T]GAATTTGACTCCACCAAAATAGTTTGCACACTCACCTCGTAGCACTGTGCTTCTATTGTG	Y	C	0.9	0.693	Y	CDS	0.116	0	0.0575916	0.211	0.108
BARC_1.01_Gm01_1537875_A_G	Gm01	1537875	A	G	ATGACACCTTACTATATACGGCGAATTCACTCGTTTTAGAATCTCGGCCTCGAGGATGCC[A/G]ATGCCATTCTCATTCAAGCGTAAGACCTTCAATGCATAAAAGGAACGGTTCTTCGTGTGA	Y	A	1	1	Y	CDS	0.474	0.302	0.411765	0.495	0.449
BARC_1.01_Gm01_1545086_A_G	Gm01	1545086	A	G	ATTGTTACATTTGGTGGAGTTATCTCCTCTGAATCACATGTTCTTCTTCTCATCTACATG[A/G]CTTGAGCTCTCAGACCTTGCTTAAGAGGATGAGTGAAGTGTCACTTAGATCAACAATTTG	Y	A	1	1	Y		0.221	0.468	0.374332	0.071	0.279
BARC_1.01_Gm01_1553914_C_T	Gm01	1553914	C	T	ACATTCCTTTTAAGCATTCTTGGCAGGAGCTCCAATGCTCTTTCTGGATAACCTTCTTTA[C/T]AAAGTTTGTAGATGATTGCATTATATGAATGTGGGTTGAGGTTAAATCCATGTTCTTGGA	Y	D	1	0.67	Y	CDS	0.219	0.468	0.37234	0.032	0.264
BARC_1.01_Gm01_1557123_G_T	Gm01	1557123	G	T	ATTAAATGAAAAGACGAGTTTGTGATTATTTTTTTTTCCGGGAAGAGTACATTAACAGTT[G/T]ACAGTAGGTAAAAATTAAGCTTTCTGTTCTAAATACTGTTAATTACTACTATAGAGTTGG	Y	D	0.899	0.60233	Y		0.221	0.468	0.374332	0.032	0.265
BARC_1.01_Gm01_1560069_T_G	Gm01	1560069	T	G	TTTTACAGCGTTATTTCTACCTCATCTTGCAATCACATCCTCCTCTACCACGGAGTGAGA[T/G]TTGGAAGAAGGACCCGGTTCGGGCTTGTTGGCGACACAGTATTGCAAGTTCGGGTGGTTT	Y	D	1	0.67	Y		0.297	0.313	0.301587	0.398	0.339
BARC_1.01_Gm01_1584120_T_G	Gm01	1584120	T	G	GGCCAACCCAACTAGTGTTTATGCATCTCTTGTTCAACTCCAGGAGGCTGCTTCTCTACA[T/G]CGCCTCCCATCAATTGGTCCTAGCATGGGACGCCAACCAAGGTTCTTCATTCTCATTGTG	Y	B	0.54	0.4482	Y	CDS	0.208	0.01	0.105263	0.376	0.286
BARC_1.01_Gm01_1604217_C_T	Gm01	1604217	C	T	CGACACCACCTGCAGCATCAAAATCCGGTTGTGGAGCCTCTCGATCGATTCCGGCGAGTC[C/T]AGAACAACGACATTAGGGTACTTAACGGTGAAATCCGTTAATTGACGCTTCCAATCGTCG	Y	B	0.9	0.747	Y	CDS	0.115	0.01	0.0625	0.213	0.112
BARC_1.01_Gm01_1612084_C_T	Gm01	1612084	C	T	CCATCGCATAAACAATAAAACCATAAATAAAACGCGGCCATGTGGGGTCGTTTTATGGAA[C/T]CCACGCCCACGCCCACGCCCACGCCATTCACCTGCACAATATAAATCTCTATTATTATTT	Y	C	0.889	0.68453	Y		0.094	0.01	0.0520833	0.126	0.076
BARC_1.01_Gm01_1620778_A_G	Gm01	1620778	A	G	GTAGGGAAACACCTTGAGAAAACAGAACAGGTGAGGCAACACTGCCACATCAGAAAACAA[A/G]AACAGAATGAAACAAAGAAGAGAGAAAACACAATATAGAGATGCTGAGGTGGAAAAAAGA	Y	B	1	0.83	Y	Intron	0.094	0.01	0.0520833	0.073	0.059
BARC_1.01_Gm01_1623069_C_T	Gm01	1623069	C	T	ATCGCTTCTGCACCCACACTAAGGTCTTTTCCCTCGTCGGAATCGCGTTTCCTCTTCTTC[C/T]CCGGTTCCTCCAAAGGTTCGATTACGGAAACGGTGTCGGGGGCTGGGGCTGAGGTTTTGT	Y	B	0.737	0.61171	Y	CDS	0.089	0.01	0.0471204	0.126	0.076
BARC_1.01_Gm01_1626833_G_A	Gm01	1626833	G	A	CGATTTGGTCATTTAAAGAATTCAATTCAGAAACACAAACTTTAAAACTTATTTTCGGTC[G/A]CTAACTAAAAACACTTATCTCAACACACCACAGAAACGTATTAAGTAGATTCAAGAACGA	N	C	0.809	0.62293	Unknown
BARC_1.01_Gm01_1628135_C_T	Gm01	1628135	C	T	GGAGGCTTGGCGCGTGAGTGAGACTCGCGGTGAACCGGGGAGAACCGTGTTCTGGACCGG[C/T]ACGGAGCCGGTTCGGATGAGAGAAGCTTGCATAGTTTTTTTTATGAGACTCTTTAGGTTT	Y	C	0.569	0.43813	Y	CDS	0	0		0.031	0.01
BARC_1.01_Gm01_1641254_T_G	Gm01	1641254	T	G	ATGTCCTCCAGTATGGTAGAGTTGTTGCCTCGCACATTCAAGGAAGATTGAGTCTCAAAC[T/G]GTGATCTGTCCTTGTTTTCCAGCCAGTACTTATCCTTTTGAGAAGAATTTCTAGAGTTTT	Y	C	0.8	0.616	Y		0	0		0.033	0.011
BARC_1.01_Gm01_1653315_T_C	Gm01	1653315	T	C	GTCACAGATTCACAGTGAAGTGATCATGGAAGCTAGAACCTCAATAATATAATATAGGCA[T/C]GAAATTCGAAGGGTTTATAAAATGGTTCAGAGTATGAAAATGAAATCATAGAATACAAGA	Y	B	0.868	0.72044	Y		0.179	0.5	0.338624	0.383	0.356
BARC_1.01_Gm01_1674562_T_C	Gm01	1674562	T	C	TTTCTTTATGTGATTGCTATTTTGTCTAGGGTTGCTTTTCTTTGAAGATACATTTGTTTG[T/C]AGCTGGGCCACTTGGGTCTCGTACTGCTTCGGGTTGCTATAAGAAGTTGAGTCCATATAG	Y	D	0.949	0.63583	Y		0.177	0	0.0797872	0.303	0.163
BARC_1.01_Gm01_1695799_C_T	Gm01	1695799	C	T	GTAGCTCGTCACAAATGTCAACTTCCCCATCAGTCTCGTCGAGAAAACGCCCCTGCATGT[C/T]GTCGTTGAGATGGTAGTAGTGTTGCTGGACCACCATGTGGACACCAATGTCCTTACTCTG	Y	D	0.976	0.65392	Y		0.464	0.115	0.318919	0.073	0.249
BARC_1.01_Gm01_1707693_T_C	Gm01	1707693	T	C	GAGGGAGATGGAGAGAGAGATGCGTGAAAGGAAGGAGTTTGGGGCTCAAAGCAAGAGAAA[T/C]ATGAGAACGAGAGAGAGAGAGTGTGAAATATGAGGAAGGTAGTTTAGTCTAGTTTCATTT	N	B	0.9	0.747	Unknown
BARC_1.01_Gm01_1708599_G_A	Gm01	1708599	G	A	TTTATGAAGAAAAAAAAAAGGTGCTGCATAAATGAAAAAGCTAATCTATCATTTATAACT[G/A]AAAATATCCATAAGGGCATTTTCGATAATTTGAAACAAAAATATTGGATGCCTCAAGCAG	Y	D	0.47	0.3149	Y		0.224	0	0.109948	0	0.113
BARC_1.01_Gm01_1714635_G_T	Gm01	1714635	G	T	CATAGGAGGGAGTGTGTATGGAAAAGTATCTTGGATAAGCGTAGGAATAGGCTTAGTAGT[G/T]GGAGACATAAATTCTTGGGGGGGGGGGGTCACTTTGATTAATTTGGTCATTTCTCCTCTT	Y	B	1	0.83	N
BARC_1.01_Gm01_1721205_G_A	Gm01	1721205	G	A	TTACCCAAAACGCGGCGTTTGGTTCCCCCAACAGTCACTAACCCCGGTTCAACTCATAAC[G/A]CTAACCATGGTTAACTCCACTCCTTTTAAATCCCTCACCCGAGCAATAAAAGCGAGAGAG	Y	B	0.9	0.747	Y		0.332	0.104	0.20765	0.378	0.274
BARC_1.01_Gm01_1744951_C_A	Gm01	1744951	C	A	GCTATTAATAACAGGATCATAATAATTAATAACGTAACAATCATATCATCACCATTAATT[C/A]TAAGCACGTTGTTATCAACTCGTGATTTTTATGTAACAAAAGTATTTCCATAATTATTAT	Y	A	0.772	0.772	Y		0.411	0.141	0.361702	0.464	0.401
BARC_1.01_Gm01_1747339_A_C	Gm01	1747339	A	C	ATGTAAAATAAATCATAATTTTCTAGTACAAGTATTAAAAACACTTTTATGTAACTATTA[A/C]TTATTGTGATTGTTAAAATTCTTAAGATTTTAATCAATTAAAAATGATATTAACATCACT	Y	B	0.413	0.34279	Y		0.429	0.144	0.351648	0	0.36
BARC_1.01_Gm01_1755954_T_C	Gm01	1755954	T	C	TTGCATTACAATCGAAACACATCTGAAACAAAATACATGTAGGGTTGTGAACCTGAAACA[T/C]GATATTCTTATCGTTGAAGGCATCAAAGGCCATGGGAACGTGACAATCGAATGAAAAAAA	Y	A	0.965	0.965	Y		0.495	0.141	0.31383	0.464	0.398
BARC_1.01_Gm01_1764786_T_C	Gm01	1764786	T	C	TGAAGAAACTCAAGTAAATACAAAGAGAGGTGTACGGACAGGTCCACATTCATTTCCCAC[T/C]CCACCGCCAAGTTGGAATGATTTGACTTTAGCTGTGTCTGACACGCGGCGGCTAAAATCA	Y	C	0.915	0.70455	N
BARC_1.01_Gm01_1785653_C_T	Gm01	1785653	C	T	GGTCCCAAGACTTAGTACCACTTGAGATGCAGCTCTTGGGGGTCCACTTTTGAAAAAAAT[C/T]AATAGAATGCAATGCCAACATGAGTACATGTCAATAAGCAACTAGTAAATTATTACAGAA	Y	C	0.9	0.693	Y		0.229	0	0.110526	0.473	0.234
BARC_1.01_Gm01_1795962_A_G	Gm01	1795962	A	G	TAACTTTATTTGTTAGCTAAAAGATTTGTTTAATTATTCAATAAATAAGTTTTTTTAATA[A/G]TTTCTAGCGTTTTTAAAATATTATTTGAGGTGACGGTTTTTTTAAAATGCTACCTTCTAG	Y	C	0.754	0.58058	Y		0.324	0.022	0.165746	0	0.181
BARC_1.01_Gm01_1803469_G_T	Gm01	1803469	G	T	TTTTATTGAGGCGTATTTGCTTCTTCACCGCGAGTGTGACTTACCGTCACCGTCGCGGTT[G/T]GTTCCTTCGGTGACGGAGGCGAGCTTCTGGAGGTTGAGCTTGACGACGGTGTCGGCGAAG	Y	C	0.789	0.60753	Y	CDS	0	0		0.011	0.003
BARC_1.01_Gm01_1866404_T_C	Gm01	1866404	T	C	TCAAGGTGAGTAAGGCGTGTGGTGGAAACGAGCGAGGGTTTGTGGATACTGATCCCGGCG[T/C]GCGAGTCCTTGATATCGGAGAGGACTACAATGCTCGCGACGACGTTCTTCTCGCGGCGGT	Y	B	0.75	0.6225	Y	CDS	0.432	0.063	0.247368	0.341	0.28
BARC_1.01_Gm01_1878290_A_G	Gm01	1878290	A	G	TACATCACAACACAATAAAATAGTTATATTATTTTTTAATATTCTAATAATTAATGGTGA[A/G]AGAGGCAAATAATTAAAAGTGAAATTGGAAGGTGTAGGATAATGAATTGCAACAAACATA	Y	D	0.69	0.4623	Y		0.458	0.083	0.310526	0.133	0.499
BARC_1.01_Gm01_1881050_G_A	Gm01	1881050	G	A	GTATGATTATATATCTATGTACGACATATTTTGATCTGGCTATAGAGAAGAAAAATTGAA[G/A]GGTCCAATATGTTTTTAATTATTATGATTTCCAAAGCAATTCTCATAAAGAAAAATGTAA	Y	C	0.765	0.58905	Y		0.469	0.073	0.265957	0.356	0.302
BARC_1.01_Gm01_1887205_G_A	Gm01	1887205	G	A	AGTAGGGCAAAGTAAAAATCTCATCCCATGAGTTATTCAGTTCATTCTTTTGGTACAAAC[G/A]CAGAATAATCTGCTTGAACACTTAATGTCACCATAAAAAAGCACAAGCACATTAACACAA	Y	A	0.965	0.965	Y	Intron	0.312	0.128	0.406417	0.018	0.398
BARC_1.01_Gm01_1888970_T_G	Gm01	1888970	T	G	TGCCACTGATGGAAGCACCTGTATGGTTATGACCGGTTCCATTCTTAGTTGAACAGGGCC[T/G]TTCTTGCAACTTGCTTGGTATTTCTTTCATAGCAGAAGGCTGAGCTCCAGAAGGCCTAGG	Y	A	0.9	0.9	Y	CDS	0.26	0.063	0.15508	0.342	0.226
BARC_1.01_Gm01_1902269_T_C	Gm01	1902269	T	C	TCACCGTTTCATACTGTTTTCACCCTCTTCACTTCTTCGCTTCTTCACCATTAATTTCAC[T/C]GTTCTTTCTTCATTAAGCCTTCCTTGCACCTTAAATTTATTTTGGTATTTTTAGTCATGT	Y	B	0.858	0.71214	Y		0.359	0.063	0.349206	0.039	0.449
BARC_1.01_Gm01_1904964_T_G	Gm01	1904964	T	G	TTTCTTGGACAAGCATGCTGATGTTGAGAGTTAATTTCCTGCTTACCACAATTATGATTT[T/G]ATTAAAAACCAATTTTTTATGTACCAAGGAGCCTAGCAACTCCAAATAATATTGATGGCA	Y	B	0.858	0.71214	Y		0.083	0.031	0.0526316	0.102	0.074
BARC_1.01_Gm01_1927246_T_G	Gm01	1927246	T	G	TTGCGGTCGTGAAGGAGGGAGAAAAGCTTGTAATCGTAGGTTCCGAGGAGGTTGTGGCGG[T/G]GGCGCGTTGGATGGGAGAGAGTGGGGGTTGTAAGAGAGTGATATTCATGATGGTTGTTCC	Y	B	0.824	0.68392	N
BARC_1.01_Gm01_1936523_T_C	Gm01	1936523	T	C	AGCCAATTTTTTTGCAATGATCTTGTATAGACTTCCAATAAGTGAGATAGGCCTATACTC[T/C]CCCAAGTCTTGCAGATCATGCTTCTTTGGGATAAGTGCCAAGAAAGATGCATTCACACCT	Y	A	0.9	0.9	Y		0.289	0.01	0.147368	0.452	0.249
BARC_1.01_Gm01_1962285_C_T	Gm01	1962285	C	T	AGGTGGAAATTTTGATTCTCATGCATCCCTTAAAATACAAGATATTTAATGCATATATCA[C/T]TGATTTTAATATTTTGCTCCATGTGTACTTTTAAAATGAAAAAAATTAGTAGTTTTAATT	Y	C	0.591	0.45507	N
BARC_1.01_Gm01_1974911_A_G	Gm01	1974911	A	G	ACTCCATTTCTTGTTGTGGTTCCATCTCTCAATTTAAACTGAAAAACAGCAATCTCCCAG[A/G]AACATTTTGGTGTAAATTAAAGTGCCTCTGAAACATATTTGTCTAAACTTCGCAGTCAAA	Y	C	0.988	0.76076	Y	Intron	0	0		0.328	0.109
BARC_1.01_Gm01_1989118_C_T	Gm01	1989118	C	T	TGGATTCTTCAATGAAGACAGCATGGTGAATATATAGCTTTGGAAGCACATCTTCACCGG[C/T]TGCACAAAGTCCTTTTCCCACATGCATTCTTTTCCCTTCTCTTTTAATACATCCTCATCT	Y	D	1	0.67	Y	Intron	0.094	0.031	0.0578947	0	0.043
BARC_1.01_Gm01_2009015_G_T	Gm01	2009015	G	T	ACCCAATTATGTGAAGGACAAAGTGGTGGTGTTGCTTCATGGATAGATAAAACGACACCG[G/T]GATGGGTCGTTCTGCAGAGTGGGAAAAGGAAATGCGTGTGTACCGAATTGGACGAGGAAG	Y	B	1	0.83	Y	Intron	0.384	0.026	0.201058	0.141	0.429
BARC_1.01_Gm01_2036901_T_C	Gm01	2036901	T	C	AGAACTGGAAAAACGGTCTAAAGTGGACTCTTCCAAGTTCCAAGTTCCAAGTTCCAAGTT[T/C]CAAGTTTCATATATGTACTTGGACTTATTTAAAAAATGGTAAGGAAAAAGTCCTGAATAC	Y	A	0.62	0.62	Y		0.421	0.032	0.226316	0.266	0.402
BARC_1.01_Gm01_2038420_T_G	Gm01	2038420	T	G	GGCAGATGTCATTTTACTGATTAGATTTTATAAAACCAATACAATATCAGGAAGTGTGCA[T/G]TGTTCTCTGCTGGGATTCTCTGAGTGAAGTGAGTAATATTCATCCCCAAGAACTCTACAC	Y	C	0.9	0.693	Y	3UTR	0	0		0.061	0.02
BARC_1.01_Gm01_2040590_A_G	Gm01	2040590	A	G	AATATATTTAAGTCTTATTTTTCTATTGCAAGAGCACTTAAATATGAAAGGAGTATGATA[A/G]TTGTTTAATATTTAGGATGGATTTGGTTTTGCTTCATGGTTTCTTTATCTAATTTTTAGT	Y	C	0.732	0.56364	Y	Intron	0.421	0.031	0.225131	0.302	0.381
BARC_1.01_Gm01_2043787_C_T	Gm01	2043787	C	T	GTACGAGATGGCAATCTATCTCAATGTGTTTGGTCCGTTCATGGAAGACAGGATTTGTGG[C/T]GATTTGAATTGCAGACTGATTGTCGCAATACAAAGCAGTTGGTTGAGTAAAGATGACCTG	Y	B	0.733	0.60839	Y					0.011	0.011
BARC_1.01_Gm01_2044842_A_C	Gm01	2044842	A	C	TTATTAACATCTAATTGTCGTAGGTGCCATTGATTGAGGGAAGCTAATGCAAGGAGAAGG[A/C]GGACTGTAGTAAGCTTTGCCACCGGAGAGAAGGTGTCGAGGTAGTCCAGTCCTTCCATCT	Y	B	1	0.83	Y		0.401	0.253	0.377193	0	0.45
BARC_1.01_Gm01_2045933_A_G	Gm01	2045933	A	G	GGTTTGATGTATGATGCCTTTTGATGCATAATAATGGTGCATGAAGAATTCAACCCCATT[A/G]TCACTTCGTATGATTTTGACCCTGCCATTATACCGTGTTTCGATGAATGCAATGAAGTTC	Y	A	1	1	Y		0.346	0.464	0.44086	0	0.447
BARC_1.01_Gm01_2057631_A_C	Gm01	2057631	A	C	AAAAAGCTGCCAGTTCAAGTGACCGACCGAACGAACACACACATGCGAAGCAGTTCATAG[A/C]ACATCATTCGCCAATCGAGGGAAGCCTTCGCACGCGTGTGTCGAGCTCAGACCAAGGGCG	Y	A	0.878	0.878	Y		0.147	0.063	0.101064	0	0.072
BARC_1.01_Gm01_2063290_T_C	Gm01	2063290	T	C	TTCGTCTTCCCTCTTCTGAACCTATTTCTCCTAACACACCAAACACCCCCTACAGCTACT[T/C]TAAGCAGCCTTCACCTACATTGAAGTGGCCTCTCTGTTGGCGGTGCTTTCCATAGTTGTC	Y	A	0.949	0.949	Y		0.469	0.105	0.31746	0.253	0.47
BARC_1.01_Gm01_2099803_A_G	Gm01	2099803	A	G	CCCCTTACACACAGAGCTACAGAGGGTCTTATTGTGTCAACACCGGAACCACCTTGAGTC[A/G]ATGTTGTAGGGGTAGTGCAGGTCGTGGCAGCACTTAAATTCATTCTCGAAGTAGGTATTG	Y	B	1	0.83	Y		0.464	0.084	0.310526	0.298	0.432
BARC_1.01_Gm01_2119881_G_A	Gm01	2119881	G	A	GTATTCAAGACCTCAAGGAAAATGCATGCAGCTTGGCCACTCAAAGACGTCGTCACCAAA[G/A]ATGTGAACAATGTCACCAAACCAAACACGTCAATACTTGATACTGCCCTTATAAATACAT	N	A	1	1	Unknown
BARC_1.01_Gm01_2124091_C_T	Gm01	2124091	C	T	CATCCCTACTTTTTTCCTCTCCCACCACCATCACTTTCAACATGAACATTTTGCCACTCT[C/T]GTACATGGCTTCTACATTTTGCCACCCTCTTAAGCTAACTAGCTAAGCTTTCCTTTTCTT	Y	A	1	1	Y		0.318	0.052	0.179894	0.073	0.15
BARC_1.01_Gm01_2131869_G_A	Gm01	2131869	G	A	ATATTCTAAACCTCACTTACATATAATATCACATAATAATTTTAAAATATTGAGGTTTCT[G/A]TAAGTATAAACTAATATACTATAATAATTAAGGTTATAGTTGAGAATACCAACTAAAAAG	N	B	0.609	0.50547	Unknown
BARC_1.01_Gm01_2133909_T_C	Gm01	2133909	T	C	GAGAGAAATCTTTTCTTTTATGCACTATTGATGTTGTTGTTTTCTGATTAAAATGGAAGT[T/C]TTATCTTGCTAATTATCATAACAAATATTTGCATTAAAAGTATTCTAAGATAAAATTCTA	Y	C	0.765	0.58905	Y		0.163	0	0.0789474	0.495	0.225
BARC_1.01_Gm01_2177956_T_C	Gm01	2177956	T	C	AGGTTGGTTGTTTTCCCACGGTAAGGACTTATACCGTTCTCGTTGGCGCGTTGTGTGAGT[T/C]GGGGAGATGGTGGAAAGAGGCTGTGAGCCGAATGTTTATACTTACTCTGTGTTGATTGGT	Y	B	0.897	0.74451	Y		0.237	0.031	0.131579	0.484	0.262
BARC_1.01_Gm01_2182016_A_G	Gm01	2182016	A	G	ATCTCCTTGACAGTACGAAGCATGCAATCCAGCATGCCCTTGAGTCAGTGATGCCCACTT[A/G]TCACCATGGTGCTTTCCCGGATCTAGAACTATTGTGTAACCATCTATTTTAAACTAATTT	Y	A	1	1	Y		0.232	0	0.111111	0.331	0.189
BARC_1.01_Gm01_2188771_C_T	Gm01	2188771	C	T	CATAGCCATTGCCGCCGCTGCTACCACCGCCGAACGGAGTAGTGTAATATCCCTCTAAAG[C/T]CTTTTGGTCAAACGCCTTTAACTGGACTCTCTCTACTTCATCTAACTGGGCTGGCCCAAT	Y	C	1	0.77	Y		0.5	0.084	0.291005	0.391	0.403
BARC_1.01_Gm01_2189703_C_T	Gm01	2189703	C	T	AATGATATGAGTTGTGCTTTGTTTTATATGTACAGCAAAGTTGGCTTCTAATGGGCGTGC[C/T]ACCGTCACATTTTTTGCTAATGCAATGATAGGAAAAAAAAAGTGTTTAAAATTCAGGAAC	Y	C	1	0.77	Y		0.13	0.021	0.0732984	0.431	0.242
BARC_1.01_Gm01_2199809_C_T	Gm01	2199809	C	T	CACGTAGGGTCCATGCTGAAGCTCTCTGAGAATCCTACCCTACGCTCCATTATTCATTTT[C/T]GAACCAGCAACGCGTGTTGCTTCTGGCCTTATTTCTGGATTCCAAAGCTCTTTGAGTGCA	Y	A	1	1	Y	CDS	0.211	0.073	0.137566	0.091	0.126
BARC_1.01_Gm01_2205606_C_A	Gm01	2205606	C	A	GGAACATTGTTTTAGGTTTTGGAATTGGCTGGAAACGCTGCGAGAGATAACAAGAAGACT[C/A]GAATTGTTCCACGCCACATCCAATTGGCGGTGAGGAACGACGAAGAGTTGAGCAAGCTTC	Y	A	0.799	0.799	Y	CDS	0.395	0.135	0.260638	0.427	0.377
BARC_1.01_Gm01_2207933_A_C	Gm01	2207933	A	C	AAATGAAATTAGATTCAGTAAATTGCATTGGTCTCAGTGAAGTGAACGCTACTTCTTGCT[A/C]TGTTTTCGATGGACAGAATGAGGAGATTTGCCACGTCGTTCACCGATGGGAAATCACGTT	N	B	0.976	0.81008	Unknown
BARC_1.01_Gm01_2210214_A_C	Gm01	2210214	A	C	CCGATGGCCTCCCTCACCACCACCCTCGTTCCGGACAAAGCGCAGTGGACCTCTTTCAAT[A/C]CATAAATTTGCACGCAAAACCTCACATCAGACACATTCTTCTCTCCCAAGACCCCGGAAA	N	B	1	0.83	Unknown	CDS
BARC_1.01_Gm01_2212455_A_G	Gm01	2212455	A	G	CATGCTTGACAATGATTAAGTCTCCGAGTTCAACAAAGACAAGAAATGGTGGGGTTTATG[A/G]CATACATGTGAAGCTCTACACCATATCCCATCACTTAAAGCCCAAGGTCAAATGTTACCT	Y	A	0.988	0.988	Y		0.223	0.073	0.143617	0.042	0.114
BARC_1.01_Gm01_2218584_C_T	Gm01	2218584	C	T	GCAACCTCCCTACGCGATCAAAATTATAACCTCACATAGCTATAACAACCGTCTCATTGT[C/T]GCCACTGGCAGCAGCGCATTGTAGAAGACAAAGAAGATCGACATCACCCAGTTGAGGATG	Y	B	0.965	0.80095	Y		0.245	0.099	0.164894	0.462	0.302
BARC_1.01_Gm01_2223826_T_C	Gm01	2223826	T	C	GTCGTTGACTAAATGCTACTATGGTCAGGTATGATGGTATACGCTGTCATGTCCTGATTT[T/C]CCTGCGATTCCCCATGTCGTATCAATATTATTCTCTTTGGAAGCACATCAAACATATCTT	Y	A	0.9	0.9	Y		0.474	0.167	0.31746	0.081	0.482
BARC_1.01_Gm01_2228552_G_A	Gm01	2228552	G	A	TTACACTATACATTCTTAAAGAAGGTGAAGAACTTTAAATATATTATACTTTGGATCAAT[G/A]ATTAAAATCTCATAATCGACTCATTAAAATTTATAAAAATATTTGAGATTTCATAAAAAA	Y	B	0.714	0.59262	Y		0.458	0.179	0.315508	0.213	0.482
BARC_1.01_Gm01_2231608_G_A	Gm01	2231608	G	A	TGTAGTAATAAAAATTTATGACGCATTTTGTCTGTTTCTTTCTTTCGATTTGGATCCTTG[G/A]GATAAATATTCATTCAACCTAATGAGATTTGACTAAGAAAAAAAAGCCACTTGACACAAT	N	A	0.809	0.809	Unknown	Intron
BARC_1.01_Gm01_2239666_A_G	Gm01	2239666	A	G	AAACGGAATTCCACAAGGGATTGAAGCAATTGGCTGATGAATGGCTGAGAAATTGATGCT[A/G]CCACTCACGTTACCACACTGTGGATTCTGCTGCTGACTGCTGCTGTTCACAGGAGGAGCT	Y	B	0.9	0.747	Y	CDS	0.247	0.095	0.165775	0.122	0.413
BARC_1.01_Gm01_2264264_A_C	Gm01	2264264	A	C	AAGATGTTGTCATTAATAATTACTCATTATAAGGTTAAGACTTAAAAGACATGAAGCATA[A/C]AAAAAATAATTAAGAGGCATTTGTTGGGTCGATTGTAGACCGACCTTATTGCTGCCCAAG	Y	C	0.935	0.71995	Y					0.341	0.341
BARC_1.01_Gm01_2267573_T_C	Gm01	2267573	T	C	AGTGCAAAATCACTAGATGGATGACCATGAAGACATTGACATCTTGGCCTCTAGCACAGT[T/C]AGCAAGAGAAATGTTATTGCCTCGCTCCGTAGGATGTAAAAATCAATATACTGCATGGGA	Y	A	0.812	0.812	Y		0.438	0.188	0.373684	0.049	0.435
BARC_1.01_Gm01_2268894_C_T	Gm01	2268894	C	T	CTTAACGTCTCTCTTAGCACCTATGTCTCCTGTCTCGCTTAGCACGAGGTACGCGCTAAG[C/T]GAGATGCTGGGTTGGGCCATTTCTGATTTCTTCTTCGTTATTTCCCACTTTTTGCTTATA	Y	B	0.683	0.56689	Y		0.063	0.063	0.0625	0.021	0.049
BARC_1.01_Gm01_2272763_G_A	Gm01	2272763	G	A	GCGTGCGGAGCCTTGAAGTTGGGGTCAAGCATGCGCAATGGCAATGTTGTGGTCACACAC[G/A]TAGGGCCTCAGATTTGGGGCAAAGGTAGGGCGGGGGAGGGTGGCGCAATCTTGTGACAAT	Y	A	0.949	0.949	Y		0.467	0.17	0.347826	0.484	0.395
BARC_1.01_Gm01_2277634_C_A	Gm01	2277634	C	A	GAGGGATGTGCTCAACAGAAGGATCGAGTTCTGCAAGCAGAAGGACGCCATCGGAATGGC[C/A]GCGAGGCTCGCCGAGACAACGTTCTGTGCGTTCAGGGAGTACACCGAGGAGGAGCTCCGG	Y	A	0.742	0.742	Y	CDS	0.073	0.063	0.0677083	0.345	0.159
BARC_1.01_Gm01_2280873_G_T	Gm01	2280873	G	T	ACGGAAGAGAATAAAGGAATAATGGACATATCCTGGGAGTGGCCTTTTTCTTGAAGGAAT[G/T]TTACCAGGATTAAAATGTGAGAGTGAACCAAGCATTAGACTCCCAAGCATTTGAAACGAC	Y	A	0.54	0.54	Y	3UTR	0.458	0.156	0.305263	0.125	0.248
BARC_1.01_Gm01_2289368_A_G	Gm01	2289368	A	G	AAACTTAGCTAATGTAGTTAAGAAATAGCTCTGGTCTATGTTAGCTAAAAAACTATAGTC[A/G]ATGTCAGTAAAAAAAATTCTAACCGACGTCGACAAAGAAAATCTAGTTGACATAAGTCAA	Y	B	0.601	0.49883	Y		0.468	0.17	0.349462	0.125	0.476
BARC_1.01_Gm01_2291634_A_G	Gm01	2291634	A	G	CGCCGTCTTCCTCCTCTTCCAAATCTCCCAACGCTTCCCCTCCCTCTCCATTCGCCTCTG[A/G]GACTCCGACGGCGACTTCCTCCTCATCGAGGCCGCCTTCCACCTCCCCCGCTGGCTCAAC	Y	D	0.75	0.5025	N	5UTR
BARC_1.01_Gm01_2345074_C_T	Gm01	2345074	C	T	ACACGAGTTAGACAACTCATACAATAGTGCACTTAGATTGAAGCAGAAATTAGGAATTTT[C/T]GTGAATTTAAATTACTAATTTTATGTAGGAAAACTGACGAGACTACATTTCACAAGAGCA	Y	A	0.809	0.809	Y		0.203	0.032	0.117021	0.308	0.313
BARC_1.01_Gm01_2348223_A_C	Gm01	2348223	A	C	ACGCGAGGGACGTACGCGCCTAAAATGCCGATGCCGACAAATGCATTGTTCCTACAATTT[A/C]TAAAATAATATTAAATAATAAAACTAAGTAATACATCCTTTACTTTTTCACTGTTAATTT	Y	D	1	0.67	Y		0.182	0.063	0.120419	0.274	0.173
BARC_1.01_Gm01_2349215_A_G	Gm01	2349215	A	G	ATTGTGTTGTCGTCTCCAACTACTACCACCCGTCATTATATAATATGTATAATGGTGTGC[A/G]CCAAATATTTGATAACTTTAAAAGCTTATCAGTCTGACCCTTATTTTGTCATGTTCTTGT	N	B	1	0.83	Unknown
BARC_1.01_Gm01_2353082_T_C	Gm01	2353082	T	C	TAATTTCATCATCTAAGCGGGTACGGAAATGAGTATGGGACGGGTAGTGACATCCATGTC[T/C]TCAACCCCGACTCCGATTAAAAAAGTAGGATAATCCCTATGTCTAGTCAATTCGGATATT	Y	B	0.683	0.56689	Y		0.131	0.036	0.0758621	0.43	0.277
BARC_1.01_Gm01_2357590_T_C	Gm01	2357590	T	C	CTTAAACACACTAAATTAAAATTGTGACAATTTTTAACACTTTGTGACTGTAATTTAGTA[T/C]TATGTCAAGTTTTAAAATACAAATTCAAGCTGTTAAAAAATAAAAATTAATTTATGAAAA	Y	C	0.509	0.39193	Y		0.083	0.042	0.0628272	0.447	0.235
BARC_1.01_Gm01_2371054_A_G	Gm01	2371054	A	G	ATATCGTTTAATGATTTAGTTCTCTGTGTAATAGTAGGTTGCTTCTGCAGAGTGAAAGGT[A/G]TCAGAGCACCAGTACTTGACCTAATGCCCTCCTTTGCTATATTCACTCATAACTCATTCT	Y	C	1	0.77	Y		0.052	0.052	0.0520833	0.298	0.266
BARC_1.01_Gm01_2374147_T_G	Gm01	2374147	T	G	AAACCTACTGTGCCGTTGGCGAGGAGAAACTCCACCTCCTCCTTGGTTCCTCCGCATTCC[T/G]TGGCTTCCAAAGTTGAGGGATTAAGAGAAAAGGTTAAGGTAATGCGTTTTCATTTCCACG	Y	C	0.889	0.68453	Y	CDS	0.021	0	0.0104167	0.308	0.237
BARC_1.01_Gm01_2377347_T_C	Gm01	2377347	T	C	ATTTGTTATAGCTTTGCTGCTGATGAGATCAGCATGACAATGTGATATTAATAGTGTTAA[T/C]AGTTTGGCAAGTATACCAAATGTCCAAGTAATAAAAACTCGGAAATCCGAGTGTCAATTT	Y	C	0.812	0.62524	Y	Intron	0.021	0	0.0105263	0	0.011
BARC_1.01_Gm01_2386998_G_A	Gm01	2386998	G	A	TCAACTACTTTACATTAAATATTATATACCTTTTGAAATGTATGTAAATGTCAAATATTA[G/A]ATTAAATATCTATGTATTGGTGGGCTCCATATACTCTAATAGTTGAGTCTTGTACACTTA	N	C	0.809	0.62293	Unknown	Intron
BARC_1.01_Gm01_2389110_A_G	Gm01	2389110	A	G	AGGTCTGGAACTTATCAATTGGTCCGCATCTTTATGAAGTGCCTAGACCAAATCAAATAC[A/G]GCATGAAGCCATTTCAGGAAGTTAGATATAAAACCATTCATTAGCCTTCTCCTGATTGCT	Y	C	0.988	0.76076	Y	Intron	0	0		0.164	0.054
BARC_1.01_Gm01_2407005_G_A	Gm01	2407005	G	A	GTTACTGTGATCCATACATACATTGTGCTTTTTTGGCTGAGAAAGAGTTTCTCCATAAGT[G/A]GCAAGGCAAAAGGTACGTGGTGGTCATCGAAGTTAAGAACAAATTAGTAGTGAAGTGTCA	Y	C	1	0.77	Y	CDS	0.01	0	0.00520833	0.5	0.17
BARC_1.01_Gm01_2414338_G_T	Gm01	2414338	G	T	CTCTGTTCCTTCTTTCCCACGCTTGGTTTCCCCCTCCTCTTCCAGTTTTAAAGATTTTTG[G/T]ACTTCTCAGATTATGAATGTGCGCTCGACGAACATGTCTCGCTAAACAAGAGTTAGTGAC	Y	C	0.642	0.49434	Y		0	0		0.043	0.014
BARC_1.01_Gm01_2418384_A_G	Gm01	2418384	A	G	CACCTCCATCGCATGATAGGCAGCGACGACTACTCACCTAACTAGTGAGTGTAGTTCTAC[A/G]TGTCTCCTTCGCCTGCATTTAATCGACACTCCGCGAGCTCAGACGATCTTGAAGAAGCGA	N	B	0.797	0.66151	Unknown
BARC_1.01_Gm01_2419868_A_G	Gm01	2419868	A	G	CTCGACCCAACGAACCCCGACAAGCTCCCGTTCTCCGACGAGGCCCTCGCACGTGTCCAG[A/G]ATGCCTGGCACGTGCTCTCCCACCCCGAACGCCGCGCCCTCCACGACCGCGAGCAAAACG	Y	C	0.488	0.37576	Y	CDS	0.021	0	0.0104167	0.126	0.296
BARC_1.01_Gm01_2424264_T_G	Gm01	2424264	T	G	ATTAAAAAAACAAATAAAAATTGAATATTTATTAGGAACAAAAACAAATATTTAAGAGGG[T/G]AAATCCCAATCATAAGGTTATTCTATTGTAAAATAACAGTAAAAATAAATCATAATCCCT	Y	C	0.609	0.46893	Y		0.011	0	0.00529101	0	0.005
BARC_1.01_Gm01_2429410_A_C	Gm01	2429410	A	C	CAACAACCCTCAAACTTCTCGCTTCTGGTACCATCCGCAACCACCCCACCTCCACCCTGC[A/C]CCGCTGCTACCACCTGGCACTGACCTTTGGCTGTACAAATTGCAAACTGCGAGAACACAT	Y	B	0.915	0.75945	N	Intron
BARC_1.01_Gm01_2434669_T_C	Gm01	2434669	T	C	TTGAACATGAAACACACTAAAATTGAAACCAAATCACCCAATGACTAAATTCTCCACCCC[T/C]CCCCCAACCACCACTAATCCCTTTCAAACAAAGGCTACTTCTAACTAAAGAGCAGCAAAA	Y	A	0.9	0.9	N	Intron
BARC_1.01_Gm01_2436877_C_T	Gm01	2436877	C	T	TGTACCTATAAGAGTTACATTAGATATTTATAAGTATTAAGTAACGTGTTTTATGAATCT[C/T]TCATCACTTTGTCACGTCTGTTCAAAAGATCATTTATAGATTATGTTAAGTGTGCTCCAT	N	C	0.858	0.66066	Unknown
BARC_1.01_Gm01_2474733_C_T	Gm01	2474733	C	T	AGGGATGCCACTGTCAGCGCAGTCGTCCTTGATCATGTGCTTTATCATCTAAGACTCAAG[C/T]GCCTCGTCCACCTCACAAGCCTTATCGTCCAAACTCTTCAACGTGATCTTCTTTGCCAAT	Y	B	0.976	0.81008	Y		0	0		0.049	0.016
BARC_1.01_Gm01_2482444_T_C	Gm01	2482444	T	C	TATGGATGAGGCCAGCAGCTCCCCATGCATACCTCCCAGCAAGAGTGAGGTCACACAGGG[T/C]GTGTAAGTAGACAACATGAACATGGGTTGCACTCTTATTAGAAAAAAGAGTGCAACCCAA	Y	B	0.421	0.34943	Y		0.052	0	0.0260417	0.122	0.057
BARC_1.01_Gm01_2499551_T_C	Gm01	2499551	T	C	CTTCTTTTGTGTCTTCAATCACCGTTTTATCGAACTCATTCTTATTATCCTCTTTAACAT[T/C]CTCCAGGATTATGACACCATCGCGTTTCTCATTGAAAAATTGACTTCCTCCAGTGGATCG	Y	A	0.9	0.9	Y	CDS	0.052	0	0.0260417	0.266	0.105
BARC_1.01_Gm01_2503340_A_C	Gm01	2503340	A	C	CATTCAGATGGAAAAGATGACCAAAGGTAAGGAGAAAGTGCGCGTAGAGCCTTCCAGAAA[A/C]CCAATGAAACGAGAGGTGAAAATCGAGAGCGACCATAATCAAAGAAAATCTAGAGCCGAT	Y	C	1	0.77	Y		0	0		0.008	0.003
BARC_1.01_Gm01_2516113_A_G	Gm01	2516113	A	G	AGGTTGCCACAAGGTCACGATGACAGCGGTGATGACACGATGGTGCGACACGACCTCGCT[A/G]GAGTTGGCCAAAAGAGAAAAAAACATAACAAGAGGGAGGAATATTACGATGATAACATTT	Y	B	0.792	0.65736	Y		0.06	0	0.0282486	0.233	0.252
BARC_1.01_Gm01_2518132_T_G	Gm01	2518132	T	G	ATGTATGGAGAAACGTCTCTAAAAAAGGTTGAGATAATGGAAGATAACTATTATTTTTTT[T/G]AACATGGTATAGATAATCAAAGGTCAAAATTTAAAAAAAATATGCAGTAATAATTTTCAA	Y	A	0.617	0.617	Y		0.182	0.031	0.104712	0.142	0.36
BARC_1.01_Gm01_2548730_T_C	Gm01	2548730	T	C	GATATATTTTAATAATAGACTCTGATTTTATTTTGGATTATTTCAATCCGGCACACCATT[T/C]TATATTTTTAAAAATATATATAATTATATATTAATAGTAAAACTTTCTTATTCAACTGAT	Y	B	0.772	0.64076	Y		0.276	0.333	0.470899	0.197	0.383
BARC_1.01_Gm01_2553004_C_T	Gm01	2553004	C	T	CTCCCTGTACCTCGCCCTTCCGCAGCCACCGCCGTTGCTGCTGCTGCTCCTCACCGGCTC[C/T]GCCGCAACCGGAATCTTCATCTGGGTCGGATCGTAGCCCGCTCCACCACCCATACACAGC	Y	C	0.685	0.52745	Y	CDS	0.052	0	0.0260417	0.094	0.049
BARC_1.01_Gm01_2558959_T_G	Gm01	2558959	T	G	TCTAACCTATTTTTTTAGGTCAAAGCAAAGGTCTTTTTATGTTATCCTACTGCCCATTTT[T/G]TTCCTCTTCAATATTCGAGAATCATAATTATTAGTTAAAAGTATCAAGACAGTATATAAT	Y	C	0.899	0.69223	Y		0	0		0.135	0.045
BARC_1.01_Gm01_2573573_G_T	Gm01	2573573	G	T	TATCTGCTCAATCCATACTTTAAGATGAAAATAGTGTCATTTGCAATGCATGTTACTCTT[G/T]GGTCAATACCACAACAATTGAGTTTGAAACTAAGCTTAAAAACCTCACCTCAGTTCGCAC	Y	B	0.868	0.72044	Y		0.292	0.309	0.489362	0.039	0.34
BARC_1.01_Gm01_2585749_A_C	Gm01	2585749	A	C	TGGTGCTGTGCAACTGTTTCTGATCTTGGGGCTCTTGGCTAGCTCATGCTTAGCCCAAGC[A/C]CCAGGTGCTGCACCGTCACAACCACCCACTACAACCCCATCACCACCACCACCCAGATCA	Y	B	0.949	0.78767	Y	CDS	0.319	0.323	0.5	0.413	0.475
BARC_1.01_Gm01_2589250_G_A	Gm01	2589250	G	A	GCCCAGACGCTGTCGCGCTCAGTGCGTGATCACACTGCCATACTCGCTAAGCCCGGAAGG[G/A]CGCGCCTAGTGCAAGGTCATAGGAAGCAAAGGGGAAAGACACTGAGTCTTAGAGCTCTCT	Y	B	0.854	0.70882	Y		0.365	0.156	0.257895	0	0.263
BARC_1.01_Gm01_2594163_T_G	Gm01	2594163	T	G	TGGCTTCTTGGTCTTCAATATCACTATTGGAGCAACTGGTTCTACTCTTGTTTCCCCTTC[T/G]GCGTGTGAGTGTCTTGGCAAGAAATTAATCAAAGCTTGGTTTGATCACCGTCTACCCTTC	Y	B	1	0.83	Y		0.38	0.153	0.262032	0.295	0.423
BARC_1.01_Gm01_2595556_G_A	Gm01	2595556	G	A	AGAGAGTGGTAGAAGGGGGTCACAGTGAAGAGAAACTGGGTCCATTGAAAGTCCTACCGC[G/A]AGAGCCACAACGATGTTCTGCAAGTGTTTCTTCTTGAAGGCAGGCCAAACTGGCGGCGTG	Y	B	0.996	0.82668	Y		0.315	0.142	0.222826	0.112	0.191
BARC_1.01_Gm01_2598445_A_G	Gm01	2598445	A	G	CTATTTTAGCATAGCTTCAAAATAGTTACATGCACACAATTTTGGGCCCGACAGGGGCAA[A/G]CCTTTATCAACAAGGTAAAGGAACTTGCTATATCCACTCTCTTGTTTGCTTATTCACTCC	Y	C	1	0.77	Y		0.385	0.156	0.268817	0.092	0.489
BARC_1.01_Gm01_2599862_C_T	Gm01	2599862	C	T	TTAATGAGGGTGGTCTCTGGTGGTGGATCTGGTAAGAATGATAGCACAGAGAAGGGAGGG[C/T]AATGAACTCCAAAGGCTAAGAGGTGATGTTTTGTTATTTTTTTAATCCCTTTCTTTTTTC	N	C	0.949	0.73073	Unknown
BARC_1.01_Gm01_2601302_G_T	Gm01	2601302	G	T	CCCTCTGCAGAGGTTCTTGCAGTGCCAGCTGAAGACCGCGCCCATAGCGTGGGTGTCTCT[G/T]GTGGCGCTCGTGGTGCATGTGTTTGTAAGTTGGTTGTTCGTGTTCAAGCTTCAGTTTGGT	Y	B	0.976	0.81008	Y	CDS	0.339	0.153	0.240642	0.26	0.254
BARC_1.01_Gm01_2610177_T_C	Gm01	2610177	T	C	TTCATCGTGCTAAACATGAGTTGACCGCTAAGCAAACATGCGTGCTAAGCTGGTCTTGTG[T/C]GTTAAGCAAGTTGTCTAAATCTTCAACTTTCCTTCAAGATTTTTTCTTTCCATTTTTGTA	Y	B	1	0.83	Y		0.484	0.163	0.320856	0.008	0.456
BARC_1.01_Gm01_2619729_G_T	Gm01	2619729	G	T	AATTCTTATAAAATTAATGAAAAGAATTAGCGAAAACATAAAAGGTGTGGAACTCAGTAC[G/T]TATAGGCATTATACAGTATACATTATGCAATCAGTAGATAAAAAAAACTTATCAGTTCAT	Y	A	0.772	0.772	Y		0.37	0.151	0.255319	0.326	0.286
BARC_1.01_Gm01_2620970_T_C	Gm01	2620970	T	C	ATCTCATGGGATTAGGTACCTAACTAAGAGGACAAATCAATAAAGAAACTTTCATGGAGA[T/C]GAGACTGATCATTTAGCCGCGGGGGGCCTGTGTACGTTCGTACTGATCCCATGATCAACT	Y	C	0.809	0.62293	Y		0.031	0	0.015625	0.49	0.174
BARC_1.01_Gm01_2638291_T_C	Gm01	2638291	T	C	CTAATATATTTTGGAATAATCCCCACCTACTACCTAATCGCAAAGATTCTCACAGCCATT[T/C]CAATTCCACTTTCAAAAGATGCTACATTTTAGTGTTCATAAAAAATACAACAATGACTCA	Y	C	0.9	0.693	Y		0	0		0.351	0.115
BARC_1.01_Gm01_2675653_C_T	Gm01	2675653	C	T	TTTTTTCGTGTAACTAAGTTTCACCTAAAGTTTATGAGACCTAGCCCAAAAATATTCACT[C/T]GAGAGAAAATGTAATTTGTCTTCTCAGCTCTAACTGAGGGGTTCTTATTGACAAGGTTTC	Y	A	0.832	0.832	Y		0.474	0.158	0.342105	0.031	0.449
BARC_1.01_Gm01_2685402_T_C	Gm01	2685402	T	C	TATCATGCCCGTATCTAACTGGGGTTCGCGGTGGTGGAGGAACTGGATAGGAAAAAAGAG[T/C]GATTCTAGTTGTAAGATAAGAGAAAAAACTTCTCACCCATATTGAGTCCCTATTTCTTGT	N	B	0.868	0.72044	Unknown	Intron
BARC_1.01_Gm01_2689421_T_C	Gm01	2689421	T	C	AGTGGGACCCAGAGAGATCAACCCTTTCCACTTCCTCACTCTCCGCTTTCTTCAATACCC[T/C]AACCACTCCTTCGCTCACTTCTTCAACGACCCCTTTCACCGATTCAGCATAGGCCTCGAG	Y	B	0.996	0.82668	Y	CDS	0.474	0.179	0.352632	0.01	0.435
BARC_1.01_Gm01_2699372_C_T	Gm01	2699372	C	T	GCGGCGTGGGCGGCGTGGGCGGCGAGAGGAAGGCTCTGATTTTCAGCGACGAAACACGGT[C/T]GTATTCCTCGATGAGATTTGCGAGATCTTCGTCGGAGGTTATGGAGACGAGAGCGTCGAG	Y	B	0.897	0.74451	Y	CDS	0	0		0.12	0.04
BARC_1.01_Gm01_2708722_C_T	Gm01	2708722	C	T	CCCAGGTTAATTCTCTTCCCCCACGCATAATAAAAATATAAATACTTCATAGATTTATAA[C/T]ATGCCTGAAAATGAAGCGGGGATTGGATGCGTGATGCTCTCTTCTTTTCCCAATTTCCTT	Y	D	0.897	0.60099	Y		0.332	0.146	0.404255	0.24	0.478
BARC_1.01_Gm01_2726443_T_C	Gm01	2726443	T	C	AGGGAATGGTTTTTCGCAAAAGAAGTAAGAATCTCTATCCACCTTTGATTTGATGATAAT[T/C]GTATCATCCTTGCCTTTCCACCTTTGACTTTGTAAAGACAAATATCATACGAAGGGGAGG	Y	B	0.812	0.67396	N
BARC_1.01_Gm01_2737250_A_G	Gm01	2737250	A	G	AATGTTACATATTTTAAAGAGATGATGAGAATGATAAAAAAAAAAAAAACACGTACGTGG[A/G]TGTGTTTTGCAAGCACTCACCAGAGCATAACAGCAGAAGCAAGAGAGAGGCGAAAGAACC	Y	C	0.897	0.69069	Y	Intron	0.094	0.011	0.052356	0.292	0.272
BARC_1.01_Gm01_2739177_G_T	Gm01	2739177	G	T	GCCGGCGCTAAAAACTGCGGTTGTTTCTGCTGGGTGAGGGTGGATTTGATGGGGTTCGTC[G/T]GCCCTGGCCGTGAGAAGTGGCTGTGTGGAGGAGTTGCCATCTGAGTGTTTCATATTGCAG	Y	C	0.949	0.73073	Y		0.095	0.011	0.0526316	0.068	0.351
BARC_1.01_Gm01_2747136_A_C	Gm01	2747136	A	C	AGGAAATTTACTCAGGTGTCTGACGTTACAATTTCAAATGAAATATTCATACCTTTGATT[A/C]AATTAAAAATGCTTACTAGGCATCGTCAGGGTCCATAGCTCAGTGGTAGAGCATTTGACT	Y	A	0.9	0.9	Y		0.447	0.188	0.367021	0.362	0.468
BARC_1.01_Gm01_2753052_C_T	Gm01	2753052	C	T	ACTATATTCAGGATTAGTAGGCAAAGGCAGTTTCTTAGACAGCTCCTCCTGCTTTCCTTG[C/T]TTTTATGCTTAGGCATTCTTTGTTGATTTCTCACTCTTACGACTGATCAAGGTCATGCAA	Y	C	0.935	0.71995	Y	3UTR	0.276	0.177	0.225131	0.29	0.247
BARC_1.01_Gm01_2762313_G_A	Gm01	2762313	G	A	AACCCTAGGCTGTGATTATCACCTACACCGCACTCGCAAGCTCCGGCCGCATCGATTCCG[G/A]CAACCGAAACCTCCACATATCGAGCTCCAACTAGTTGAGCGAGAGCTCCACCGAGCCACC	Y	B	0.75	0.6225	Y		0.328	0.052	0.188482	0.487	0.31
BARC_1.01_Gm01_2769520_G_A	Gm01	2769520	G	A	GATTTGGATTGGGTGTGGGGGAAATTCGAAAAGTAGATGAAAATAATTTGTTTACTAGTA[G/A]TTTTCTTACTAGCATATTATAATGTTTTAGAGATGAAAAATAGATGAAAATATTTGTAAG	Y	C	0.494	0.38038	Y		0.156	0.167	0.161458	0.089	0.413
BARC_1.01_Gm01_2774196_A_G	Gm01	2774196	A	G	TCCTCGTCTTTAAAGTTATCGGTAATGGCACTTCCAATCTCGAATCCCTCTTGTTAGAAC[A/G]TCTCTCCATCCACCTTGGTTAAAGCCCAAACTTAAATTTGCATTGCAAGAGCAGGAAAGA	Y	C	1	0.77	Y		0.37	0.198	0.282723	0.091	0.495
BARC_1.01_Gm01_2775786_C_T	Gm01	2775786	C	T	TTCTAATAACATTTTCTTTCTTTAGGAACCACCGTTTGAATATTCTTAGCCAAGGGTAAC[C/T]CCTTATCGTCTTGCAACTCATCTTACATCATCATTTGTTATTTACTGTTGCCTCTTTTGG	Y	B	0.868	0.72044	Y	CDS	0.146	0.158	0.151832	0.298	0.34
BARC_1.01_Gm01_2780300_A_G	Gm01	2780300	A	G	TTATTTTTTGCATCCTCTTCACCACTTCAACCTTTACTTTTGATACTTTTTGTTTGGACA[A/G]TTATGAAGTTAGAGATATGAGGCTCAATGTTTACAGCCTAACTCCATGCATGAAGAGCTC	Y	C	0.965	0.74305	Y		0.146	0.167	0.15625	0.316	0.338
BARC_1.01_Gm01_2785930_G_A	Gm01	2785930	G	A	GCAACTGTTGAATCCATCAGTCATTAGCCTTGCTCTTCTTCTCAGTGATTCAAGTATTCC[G/A]GTGCTGCAAGTTATTGGTAATTGTCAATTCTACATAATGACCCCTTTTTTCTTATGATTT	Y	A	0.505	0.505	Y	CDS	0.214	0.031	0.120419	0.224	0.157
BARC_1.01_Gm01_2796446_A_G	Gm01	2796446	A	G	GTCACACTATTGTGAGAGATTGACATAATGAGGTTGTGTTGTCATAAGGGATGACTAATA[A/G]AGAGAATGAGGTCATGCACGCAGATGGAAATGAATGTCTTTGTTTGCTTAGGCACACTTC	Y	C	1	0.77	Y		0.073	0.011	0.0418848	0.431	0.17
BARC_1.01_Gm01_2809603_T_G	Gm01	2809603	T	G	CTATCTAATTATTTACTCTCATAATAATAACTGCAGCAACAATGTACTCTTGAAGCACCA[T/G]GTGTTCTCAAGAATCCCAACATAAGGTTCACCAAAATGCATCCATGATTTAACATTTGCA	Y	B	0.988	0.82004	Y		0.458	0.167	0.310526	0.115	0.248
BARC_1.01_Gm01_2811458_T_G	Gm01	2811458	T	G	TAAGGTTAAATTATGTGCATAAACCACTTTTGATGCAAGATTTGTTGAGTGTTCATTTAC[T/G]GTAGGTTGTCATTCCACTAAGAGGATAAGTACAATAACTAGAACATTGGTTTTCTGAAAC	N	C	0.965	0.74305	Unknown
BARC_1.01_Gm01_2813785_C_T	Gm01	2813785	C	T	AGCTAGTGATATAATGCTTGGCATACCGATAAATAAAGAGTAATTAATATCAATGCAACA[C/T]TGTACACACAAATACTAACTCAAACACATGAGAGGAGGCGAAGGAAATTTCAAGAATCCT	Y	D	0.813	0.54471	Y		0.276	0.219	0.470899	0.195	0.421
BARC_1.01_Gm01_2820251_G_A	Gm01	2820251	G	A	GGGTGCTAAAAATTGATTCGTAAATCTGCCCAAACCTGACTGAGGAAGCGTAAAACAAAA[G/A]AAAATGGGGATTAAAAGATTAGCGCATATTGGAATTATTTAATAATATCCATGATTTATG	Y	A	0.646	0.646	N
BARC_1.01_Gm01_2876178_A_G	Gm01	2876178	A	G	ATATAGTTTTATTCATTATTGTATATATACGATATTATTTTTAATTAATATGATATGTCT[A/G]CAAATATTTAAGTATATTGTACTGAACTACAGTAGACATGTAAAAAACTACCGTATACAG	Y	C	0.714	0.54978	Y		0	0		0.01	0.004
BARC_1.01_Gm01_2898622_A_G	Gm01	2898622	A	G	AGTGAGAAGTGAAAGACAACCTGAAGAGTAAGGTCAGATATACAAGGGCCTTGTAAAGTA[A/G]CAGGTTTGATGAGGAACTTGAGTTGTGCTGGAATTTTAACTGTAGCACCAGCAACTTTAC	Y	A	1	1	Y	CDS	0.078	0.177	0.125654	0.042	0.1
BARC_1.01_Gm01_2928374_C_A	Gm01	2928374	C	A	TCTCATACTATGACATTTCACATAGTGACACTTCACTCAACATTCTTGTTGATCAAGACC[C/A]TCCACTGGTTAAAACCCTTCATAGGTAGCCTTTTGCAAGACCTCGACAACTAGGTCTAAC	Y	B	0.53	0.4399	Y		0.432	0.302	0.434555	0.063	0.311
BARC_1.01_Gm01_3014992_C_A	Gm01	3014992	C	A	TGCTTGGTTCAATTAAAGAGTACAAAGAAGCAAGTGGCGTTGCACCACGTGATGGATGCC[C/A]ACTTCAAGTTCAGGGCAATGGTGAAGAGTGAAAGAGATCCTTGGGTGGCACAAGAATTGG	Y	A	1	1	Y		0.313	0.396	0.457895	0.481	0.467
BARC_1.01_Gm01_3016694_A_G	Gm01	3016694	A	G	CAATAATGAAAATGAACAATGATTTTATCTCAAAAATCTCATCCTTTATATACACATATT[A/G]ATGAGCCTTTGAATCCATGGACCTTACCTATTGCTAATGCAATGGTAATCCTTCATTATC	Y	A	1	1	Y		0.313	0.396	0.457895	0.282	0.458
BARC_1.01_Gm01_3018176_T_C	Gm01	3018176	T	C	CTTTCGCACCCTTGTTCACCCTTCATCTTCTCCACCAGTTGCTTCCACCTCACCCAACCC[T/C]AAATTCACAGCCAAACAACTGACCTTGGAGGAGATGGCAGTTAAATGAGACAAAGGTCTC	Y	B	1	0.83	Y		0.323	0.389	0.465608	0.277	0.452
BARC_1.01_Gm01_3020382_A_G	Gm01	3020382	A	G	TTTTCTTCCCACAGCACTTCTCATTTTTTTATTCACACATTATATTTAATCAATTAATCT[A/G]AATCTTACTAACACATTGACACAATATTTTTCATTTGTTTTCCCTTTTACGTAATCATCC	N	B	0.689	0.57187	Unknown
BARC_1.01_Gm01_3021902_G_A	Gm01	3021902	G	A	TATTTGGAGCCACACGTGCGAGCGGGGGTCGTAGGCGTGGAGAGTTGTCACGTGCGAGTG[G/A]CGGAGGCTCTGGGTGAGGACTATGAGCCATGGCTTGATGGGTCTGACGTGAGCGAGGGAG	Y	B	0.787	0.65321	Y	CDS	0.42	0.354	0.465608	0.359	0.431
BARC_1.01_Gm01_3035287_T_C	Gm01	3035287	T	C	ATTTGAATTTAAAAGAGAAGTTACAACGGTTGACGAAAAGGGTTACTAGAAGATGTTAGA[T/C]GTCGTTACATCTAAGTAATTAGAAATTTGTTGTACACATATCGAAAATCTATAATTCAAC	Y	C	0.772	0.59444	Y		0.49	0.365	0.436842	0.053	0.312
BARC_1.01_Gm01_3055492_A_G	Gm01	3055492	A	G	TCACCCATGGACGTGAAGACATACTTAACACTGTCATTGGGCGACTGGATCATGGAGGGC[A/G]TGTTTGTGCAGCGGGGTTTGGGGTCACAATAAGTCAATACTTTGGAAAGACAACACGTGC	Y	C	0.535	0.41195	Y		0.161	0.052	0.104712	0.12	0.358
BARC_1.01_Gm01_3063603_T_G	Gm01	3063603	T	G	TCACAACGCTGCTTCTTCTCTCAAGTGAGTTCGCTGTTCGCTTCATTGTCGAATTCTAAC[T/G]CTTCTTTTCTTTTAATCGATTATCAGTGTTTATTGTCGGTTTCTGTTTGCAGTTCGGTTG	Y	D	0.809	0.54203	Y	Intron	0.214	0.406	0.403141	0	0.27
BARC_1.01_Gm01_3083398_C_T	Gm01	3083398	C	T	AATGCGGCCGATGTGAACCCAATTGCAGTTGTGTTGCGGTGATGGACAGTTAAAAAACTT[C/T]GATGTTGCGGGCCCTAATCACGTTTCGGACCATTTATTAAAAACCCTTGTTCAAGAGTGT	Y	C	1	0.77	Y		0.125	0.052	0.0842105	0.25	0.311
BARC_1.01_Gm01_3101914_T_C	Gm01	3101914	T	C	TTTAGACTATGGAAATGGCTACCTAGACTACTTCCCATACTGGCACGTGCCACAACTGCT[T/C]ACATGATCTTCTAATGATGGCAAGCCTTTCACCACATTCTGTTTTTTCATGTGTAACAAT	Y	B	0.965	0.80095	N
BARC_1.01_Gm01_3112052_T_C	Gm01	3112052	T	C	TCTAGATCCATTACCAAAAAAACTTTTGATACAAGAGATGTTTAAACTAAGGATCCACTG[T/C]CGCCCCATCTTACTTGTGCGAGCTGATCATGAAGTCGAACCATCGACTTTGATACCAGTT	Y	B	0.822	0.68226	Y		0.23	0.073	0.142857	0.118	0.405
BARC_1.01_Gm01_3121012_T_G	Gm01	3121012	T	G	AACGGCGCCGTTTGGTGCTGCGACGTCTCAAGCAAGCTCTTCATCACTGTTTTCAATTCA[T/G]CTTTTTAATAATATTGATACTGATAGTAATTAATTTGGATTCTGATGCTGCTTCAGGAGA	Y	A	1	1	Y	Intron	0.385	0.309	0.462766	0	0.358
BARC_1.01_Gm01_3145235_T_C	Gm01	3145235	T	C	GGCTATAATTATAGTCATTTCTGCAGTTGCTTGCTGCCTTGGAAGGCTTTGCAACCGTCG[T/C]GGTGGCCACAGCCACAACCAGAAACATGTTAAGCCACAAAAGAAGCAGCAGCAGCAGCAG	Y	A	0.878	0.878	Y	CDS	0.385	0.323	0.468421	0.276	0.449
BARC_1.01_Gm01_3146865_A_C	Gm01	3146865	A	C	GGTTTGCCTTGCATTTAGGATCCTAGAGCATGCACAATTGAAAAAATTTAAAACAGTAGA[A/C]ACATGTTTTTGTTGTGAATCTGTTCTACATACATAACAAAATCAGTTTCTGTTGAGGAGA	Y	A	0.757	0.757	Y		0.422	0.223	0.322751	0.452	0.367
BARC_1.01_Gm01_3161613_C_T	Gm01	3161613	C	T	ATTGTGATATTCAAGCTTTGTTGAATGCTTTTAGGCTAAGAGCATGGAATTGGGCAAAGG[C/T]TCATGTCAAAAGTTTTAACCCATCTCTCTATGCTTGGAATCTGCAACCAAAGGAAATGCT	Y	B	1	0.83	Y		0.047	0.158	0.1	0	0.07
BARC_1.01_Gm01_3163236_G_A	Gm01	3163236	G	A	TAATAACCGTCGTCGTTTCAATCTCGTTACACACCTCAAAACGCAGCGGCACACTCACTA[G/A]AATGCAAGCCGTTTCGCTCTCACCTTTGTCGTTTAGGGATTCTTCCGACGAGTTCGCTGG	Y	A	0.878	0.878	Y	5UTR	0.351	0.195	0.268817	0.229	0.261
BARC_1.01_Gm01_3221072_C_T	Gm01	3221072	C	T	CTTCAAGGGATACGGCGTCGACATGAACAACCCCACCAACACGTTCTCCAACTACGCCGG[C/T]GGCGGCAACGGCGCCGTCGAGAGATTCTCCAGCTACCGCGATAAGGCCAACGTCGGAGCC	N	C	0.75	0.5775	Unknown	CDS
BARC_1.01_Gm01_3221969_C_A	Gm01	3221969	C	A	CGACCCGAAAACAAAGGTCAAGATTAACCGTGGTGTTGCCATCTGTCACTTGGACACCTC[C/A]GATTGGAGCCCGACCCATGGAGCATTCATCTCGTTAGGGTCGGGTCCAGGTCGGATTGAG	Y	B	0.996	0.82668	Y	CDS	0.125	0.01	0.0677083	0.37	0.167
BARC_1.01_Gm01_3236760_T_C	Gm01	3236760	T	C	GAGCCGTTCCTCATCACGTCATCATGGTTGACCATCGCGATGACGTCGTTACTACATGTT[T/C]CCCTTTCATCGTTGTCTATTTCTCTTCGCTTCCCCTCAATGTTCGTTTTTTTCTCACTCG	Y	B	1	0.83	N
BARC_1.01_Gm01_3260769_C_T	Gm01	3260769	C	T	AGATTCGACATTCAATCAGAATATCACACATGACAGTTATCATCCAATAAAAACATGACA[C/T]GTGAAAGTCAATATTTCTTTGTGACAGTCAATGTCCAATTCTGGATTTGAGGACCAAGAT	Y	C	0.545	0.41965	Y		0.01	0.232	0.120419	0	0.083
BARC_1.01_Gm01_3266074_T_C	Gm01	3266074	T	C	ACACAACAAGCAAACAAAACAAGGAATTAGTTGAGTGATCATGGGACCAAAGACCATGGA[T/C]TTTGTACATTGTTCAAGAACAATTAGAAGGGTGAAAATACATAGGCTGTCATCTTTGGCC	Y	C	0.9	0.693	Y	Intron	0.104	0.036	0.0680628	0.497	0.213
BARC_1.01_Gm01_3268225_C_A	Gm01	3268225	C	A	TAATATTCAGTGTCGATTCTTTTATTTATTATTTTGTTACCGATGTCAAGAATTTATTAA[C/A]TTTTCCAATACTTAATATTCGTACAAAAATATGTATTTTTCTGTAATAAAGTATTTATTC	Y	C	0.636	0.48972	Y		0.094	0.021	0.0572917	0.361	0.156
BARC_1.01_Gm01_3275340_T_C	Gm01	3275340	T	C	CATATCCCAATATCATTACAACTATATAATATAAAAAGCCAAAAGGGCGTGGTAGCATCG[T/C]TTTGTGATGTAAGGTCTGTGTGAGATTCTACCTCTCCACTACGTCGGTGACGAATGCAAA	Y	A	1	1	Y		0.469	0.474	0.497354	0.052	0.35
BARC_1.01_Gm01_3278987_T_C	Gm01	3278987	T	C	TTGCACTACCTTTTTTTCCTTTTGAACAAAAACCCCTTTGTTCCTGCAAGTTGGTTGCCT[T/C]CACCTTTCAGCACTTTCTTCATCTTCATCAATACTATTCAATCTCCTTTTCTTTTCTTTT	Y	B	0.602	0.49966	Y		0.463	0.396	0.417178	0.326	0.484
BARC_1.01_Gm01_3281127_A_G	Gm01	3281127	A	G	AGTTAGAGCAAGTTGTTGTGCCTCTTGCCCTCTTCTTTTACATACAAAAACGTAAACATG[A/G]TTATCATGGAGCTTACATAATAGCATTCACATGGAGCTTAACAACATAACATTCATTTCC	Y	A	0.988	0.988	Y		0.469	0.474	0.497354	0.395	0.465
BARC_1.01_Gm01_3285186_A_C	Gm01	3285186	A	C	TGGATAATTATGAGCAAGATTTTTTTTAGGAATATTAGCCTGTTATCCCTGCATAAAATT[A/C]TGTGTATGGAATTAATTGATCTTTTCCTTGCTGCTTTCTTTCTGTTAGGTTTTGGTTATT	Y	A	0.723	0.723	Y	Intron	0.49	0.469	0.489474	0.052	0.359
BARC_1.01_Gm01_3289948_G_A	Gm01	3289948	G	A	ATCGAGGACATATGACTACTACCAGTCTGTTAATTTCATGTTAAAAAACACAAGACATTT[G/A]TCGGTGTCATCATTGGTTTCAAGACTGTGTACTGACAACATCGGGGACATATGACTACTA	Y	A	0.95	0.95	Y		0.417	0.441	0.427807	0	0.431
BARC_1.01_Gm01_3297577_C_T	Gm01	3297577	C	T	TCTCTATATCATAATCATAATTATAACAAACATGCAAAAGATAACTTCGTAATTTACTTA[C/T]CTCCTCAGATTAGGTCCATAAATGTCAGCATGAAGAAGTGTCATTTGGTGAGGATATCAC	Y	C	0.505	0.38885	Y		0.385	0.453	0.417989	0.139	0.328
BARC_1.01_Gm01_3298732_C_T	Gm01	3298732	C	T	TTCTAGATTTTTATCATTGGTTTTCTTTCGTTATGCTCTTTTTCTTTATCTCAACATGTC[C/T]TTTTGTTGTGTCACTACACACTAATGATTCTCATGACGAGCTGCAACAAAAATACGCAAA	Y	C	0.889	0.68453	Y		0.479	0.469	0.473684	0.142	0.401
BARC_1.01_Gm01_3300360_T_C	Gm01	3300360	T	C	TAATTTTTCAACATGTTAATCTACTCCATTTCTCAGTTATGCTAATCACCTCCATATCAG[T/C]GTTCCTAAAGTACATAACAATGGCTCCTAAAGTACCTAAACACAACATCCATTGCCCTTC	Y	B	0.832	0.69056	Y		0.479	0.474	0.47619	0.284	0.455
BARC_1.01_Gm01_3303893_C_T	Gm01	3303893	C	T	AATAAAAAGTTCAAGGACTTTAACAAGTTAAAATTTAAATTAGGGACTAAAATTAGAAAT[C/T]CAAAAAAAGTTTATGGATCAAACAGATATTAAATCCATATATTTTGTGAAATCCAAAATA	N	B	0.596	0.49468	Unknown
BARC_1.01_Gm01_3305054_T_G	Gm01	3305054	T	G	TATGTTATATATATACGTCGGTGTGAATTAGCTACACAATGATTAAATTCCAAAATCCTC[T/G]TCTTCTTTTCTTTATTGGTCCAACGAGATCCTCTATTGAAATGAACACTGACCACTCAAC	Y	B	0.965	0.80095	Y		0.417	0.474	0.444444	0.305	0.474
BARC_1.01_Gm01_3307904_A_G	Gm01	3307904	A	G	TTTTTCTTTACACTAATCTATTTTTGTATTCTATTATTCATTATAATTTATGATAGGACG[A/G]TATTTACTTTTACTGTATTCATGGATGATAGTTAAATTCATCATAATAAACAGAAAATTA	Y	C	0.609	0.46893	Y		0.323	0.436	0.37766	0.237	0.334
BARC_1.01_Gm01_3313749_A_C	Gm01	3313749	A	C	CGCGGCGCGGCTCCCGAGAGCAGCTTTGCGGCGCGGCTCAGAAGCACGTTTGAGAAGCAC[A/C]AGGTTTTGCAGAGGGTTTTGCTGGTTTTGGCGCTGATTGGGACTTGCATGGTCATTGGAG	Y	B	0.976	0.81008	Y	CDS	0	0		0.011	0.004
BARC_1.01_Gm01_3318347_G_A	Gm01	3318347	G	A	GTTTGAGAATGATCTTCTGTGCTGCATAGCAGAGTTCATACGCACAGAAAGAACTGGGTC[G/A]AACTCTTCAAATGATGAGCCCGTAAAGGATGACAGAATGGCAGTTGTAGGGACATGTTCT	Y	A	0.768	0.768	Y	CDS	0.021	0.01	0.015625	0.039	0.024
BARC_1.01_Gm01_3321534_A_C	Gm01	3321534	A	C	CGGATCCATCCACGCTGGCACGTGCCGGCCCCACCAAGATTGGTCATCTCGCACGTGCGA[A/C]TCCTCCGTACAGTTCCACCCTGAGATGGCGCGTGTGATTCTGGCGATCTTGACGCGTGTG	Y	B	0.789	0.65487	Y		0.432	0.479	0.454545	0.409	0.443
BARC_1.01_Gm01_3327321_A_C	Gm01	3327321	A	C	GATCACTCTGGCACCGTTAATTCGGCGTCGCCGTTTCAAGGTGATCGATCCTTCACTGCT[A/C]AACTTCGGTTTTCTTCTCTTCTTTATAGGTTTCTAATTTTTCTTATAAACTTTTATCACT	Y	B	0.824	0.68392	Y		0.432	0.474	0.452128	0.234	0.446
BARC_1.01_Gm01_3329900_C_T	Gm01	3329900	C	T	GCTTTGGCCTCTCTTTCATTACATGCTACCTATGTTCCCTGATCATGGTGATCGGTTTGA[C/T]CGCTCGTTGTGGCAGGCTTATGTTTCTGCAAACAAAATATTTGCGGACAAGGTTATGGAA	Y	C	0.719	0.55363	Y	CDS	0.411	0.468	0.438503	0.316	0.401
BARC_1.01_Gm01_3339814_T_C	Gm01	3339814	T	C	AAATGAATTCTGCTCTTTTGTTTCCTCCATGTTGTCTTGCTCTATTTATCATATTATTCA[T/C]GCAGAACTCATACGCTAATTGGACTCATCAGAGTCTTGTTTTACTCTCTGCAGGGAATAA	Y	C	1	0.77	Y		0.053	0.01	0.0314136	0.124	0.062
BARC_1.01_Gm01_3340861_T_G	Gm01	3340861	T	G	TATCAGAAAGAAATTTTGGAATGTAATAATATTGATTCATACATCTCTATCAAGATGACA[T/G]ATCCATTTTATGTTCTGTACCTTCGATAAGATCAATTAAAACAAGTCACACACTCATATT	N	A	0.687	0.687	Unknown
BARC_1.01_Gm01_3354642_C_T	Gm01	3354642	C	T	CATATCTAGAATTTATACTCTTAAAATCCTATATATACTCATCTAATGAACTTTGGACTA[C/T]TTCATCTACTCAATTACAAAATATTGTAAAATCTAGGATTAGGGATGAAAAAGTATAATC	Y	A	0.551	0.551	Y		0.426	0.463	0.443243	0	0.45
BARC_1.01_Gm01_3361120_G_A	Gm01	3361120	G	A	AAAAGAATGTGCTGCCATTCGTGCTGCAATAAATGAAAATGATAATGACTATAGGCATCG[G/A]AACCTGGCTAAGCTAATGTTCATCCACATGCTTGGTTACCCCACACATTTTGGTCAAATG	Y	D	0.9	0.603	Y	CDS	0.464	0.489	0.475936	0.417	0.491
BARC_1.01_Gm01_3363641_T_C	Gm01	3363641	T	C	GTTGTGGGAAAAGAAGGGTGTGTTGAAGTTCCACATTGTGGTGGGTAGCCGTGACCAAAA[T/C]GGGACATGTTGAAGTCCCACATTGACTAAAGATAGTGCCGAGGTAAAGTATATAAGTGGG	Y	D	0.598	0.40066	Y	Intron	0.464	0.484	0.473404	0.398	0.487
BARC_1.01_Gm01_3367768_A_C	Gm01	3367768	A	C	GTATGGTATGCCTTAATTGTTGTGATAACCAATGCTTCTGAGCTTCATGGATATACAGTA[A/C]GAGCATTATACAGAGCATTTCAAATGTCAGCTGAACAGGTGCTCACTTCTGCTTTGACCA	Y	D	0.454	0.30418	Y	CDS	0.468	0.489	0.478495	0.415	0.489
BARC_1.01_Gm01_3371134_T_C	Gm01	3371134	T	C	TTTTGAGTGCTAAATAGTTACATCTATTCTTTAATATTCAATAATTGTGAGCCGTTCTAC[T/C]GGGTGCTTTGTTGGAATTTCAAAATCTTTTGAACTGCTTTGTTACCTTCCATCATCTAGT	N	A	0.889	0.889	Unknown	Intron
BARC_1.01_Gm01_3372977_A_C	Gm01	3372977	A	C	TTTCTGCAACGCTGAAGAAAATTCGACGAATTTTAGCTAATAGTAATACTAATATTATCT[A/C]GCACCGTAGCCCTTTCACTTTGATTGGTTCTTGGAAAGTCCAACTTCAAGACCGTCACAT	Y	A	0.9	0.9	Y		0.495	0.489	0.491979	0.069	0.367
BARC_1.01_Gm01_3390236_T_C	Gm01	3390236	T	C	CCCTTACCAATTACTGTTAGCAAAATAATGTTTGTATAGCACACAAAATTCATTAAGTCT[T/C]AATGGCTAATAAGCAAATAGTCAACCATGCCTCTTCTTCTTCTTCTCTTCTTCTTCTTCT	Y	B	0.772	0.64076	Y		0.193	0.2	0.191489	0.182	0.194
BARC_1.01_Gm01_3396376_A_C	Gm01	3396376	A	C	TAAGGGTTTTAATTGAGACTAGAAACAAGCTAAAGAGAGACTTGGACAATTGTGATGTTG[A/C]GAATAACAAGCTAAAGACTAAGGCTGCACAATGGTTGCCAAAATGCAAAACTGTCACCAC	Y	C	0.889	0.68453	Y		0.306	0.302	0.303191	0.2	0.27
BARC_1.01_Gm01_3400641_G_A	Gm01	3400641	G	A	ATGCTATGCTATGCTCTCTAATCCGTATCCGCCGTCACGCTCCTTTCCACCACACTCTCC[G/A]CTCTCTCTTGCCGATTAACCGTTTCTCCTCCTCCTCCTCCTCCTCCGCCTCCGCCGCCGC	Y	B	0.877	0.72791	Y	CDS	0.305	0.203	0.247312	0.435	0.319
BARC_1.01_Gm01_3412546_T_G	Gm01	3412546	T	G	TCCCCACAACCATCACTGTGTCATCCCTTAGGTATGTTCAGGAATTGGATTTTGTAAGCA[T/G]AAGGTAAATTTTTTAAATTATGAAACTTATATATAATTAGTATTTATAACAACAATAGCA	Y	B	1	0.83	Y		0.375	0.208	0.287234	0.029	0.485
BARC_1.01_Gm01_3432514_C_T	Gm01	3432514	C	T	ATTCTAAGTTATATTTCCAAAGAAATGTGTGATCTTGATCAAGTTTTCGCTCTCGACCCT[C/T]CCAATTGAAATGGCTTGTTAACTTATCATTGTTGGGAAGAATGTGTATGCGAAAATCAGA	Y	C	0.812	0.62524	Y	Intron	0.25	0.304	0.28	0.459	0.354
BARC_1.01_Gm01_3458582_T_C	Gm01	3458582	T	C	TCCGACAGGGAAAGGATGGTATTATCAGGAATATCCCGGTTGGGTCAATTATCGGGTCGA[T/C]GGAACAGGTGGGCTTTGTAGAGCGAGACCTTCCCGAGCCATGCATACTTTTGACCCCGTT	Y	B	0.915	0.75945	Y	CDS	0.375	0.443	0.465608	0.311	0.417
BARC_1.01_Gm01_3461952_T_G	Gm01	3461952	T	G	TCTCTTTCTTTTATTTCTTTCTCGACTTTCTTTCACCATGATAAACTATCCTTATTCGGG[T/G]GATTTTAATGGTTTCTTGTAAGATTACAATTCTTCAATTATTGGAATATATGATTGAGGT	Y	C	0.841	0.64757	N
BARC_1.01_Gm01_3483807_C_T	Gm01	3483807	C	T	TTCATCAAGCTTTTTGAGGCAAAGGTAGAAATTAACATTCAAGTCTCAAGGTGGAAAAAG[C/T]CAAGCCAGTTCTTCCGAGGCCAAGGCAACTTTAATAATGAAGGAGCTAGAGGACCAAGAC	Y	C	1	0.77	Y		0.104	0.26	0.182292	0	0.182
BARC_1.01_Gm01_3486076_C_T	Gm01	3486076	C	T	CCTGAAGAGTTAATAGTAACAATCTGCTTGAAATCCTATCTGCCATACTAGTTCTCTTTG[C/T]AGAGGGAAATCCAAGAGCTTGGATTTACTCAGATTTGATAAGGAGTTGATAGCTGTAGTT	Y	C	0.889	0.68453	Y					0.02	0.02
BARC_1.01_Gm01_3490224_T_C	Gm01	3490224	T	C	TCCCTCAGAGATCTTTGCCGCAGAACTATTGGCCACAAAATCTAGTGAGACTGGAAATGA[T/C]ACGTTGCCATCTTGAACAACTTTGGGAACCAGATCAGGTTTTTTAAGCTTTCTATCTTTC	Y	C	0.505	0.38885	Y	CDS	0.2	0.321	0.279661	0	0.28
BARC_1.01_Gm01_3494340_T_C	Gm01	3494340	T	C	TTTAACCCCTTATCTTTGTTAGATATCTTTGTTGGATATCCACTACCTGGCCCAAATCAA[T/C]GTGGATTTTGATAGACTTGAGTTTTGAAATTAGACTTAGTCACGGGTTAATGCCCTATTC	Y	C	0.965	0.74305	N
BARC_1.01_Gm01_3497345_C_T	Gm01	3497345	C	T	CGCCTCCTCGAGAGACGCGTTCCCTGTAAAGGTGACACGTGACATGACTTAGGACGCGCC[C/T]TGCGTACAGGCGCGTTGGGTTGCGCTGGGGATCCAAGCGCGTCCAACTGGTCCGTGTAAT	Y	B	0.633	0.52539	N
BARC_1.01_Gm01_3507108_C_T	Gm01	3507108	C	T	CAGACATGGACTATCAAAGACTACCCTGAGGAGCTAATGTTGATAACCATTAGTACCAGT[C/T]TCTCTGTTATCCTATCTTTCATAGTGGCTTTCATTGCAGAAGAAAATCCTAAGGCATGGA	Y	C	0.812	0.62524	Y		0.111	0.26	0.184211	0.414	0.263
BARC_1.01_Gm01_3512849_C_T	Gm01	3512849	C	T	CGAGTTTTACTAAAAAATCGTCGTAATCTCACGGTCCACATGTTGTCAAGGGCATTCACA[C/T]GCTTATCTCACGGTCCACACCCCTTGGCATTCACACGCACAACCCCTCGACCTCGAAAAA	Y	B	0.9	0.747	Y		0.474	0.036	0.247312	0.07	0.199
BARC_1.01_Gm01_3519206_T_C	Gm01	3519206	T	C	TATCTCAAACCTTTGTGTGCTCTTGGCCATAGCTCTTATACCACTGATGGGTAATCAATG[T/C]TTCCACAAAAAAAATTACATACACTCAGAAAAGATCGTGAAAACACAACAAAGATTACAC	Y	C	0.659	0.50743	Y	Intron	0.411	0.297	0.441489	0.116	0.415
BARC_1.01_Gm01_3524502_G_T	Gm01	3524502	G	T	ACATGGAAGGAAATGTATCTTCTTTGTTTGAAAGAACAAAGTTTAACAGAAATATTTTTT[G/T]GTATAATTCCCCTTTTTCATTTGCAGGTCAGAGCGTCCTCCTCTTACATTCTCTGCACTT	Y	C	0.9	0.693	Y	Intron	0.12	0.26	0.185185	0.5	0.303
BARC_1.01_Gm01_3533525_T_G	Gm01	3533525	T	G	GATAGCCCTTTAAGCTAGGGAAGGACTAAGGAGAATATTGTTGAATTCTTAGGAAGGTGT[T/G]AAGTTATCTAATCGAAACGTGGAGAGAAACAGTTATGCATAAAGAGCAATAAGAACAAAG	N	C	0.988	0.76076	Unknown
BARC_1.01_Gm01_3537008_C_T	Gm01	3537008	C	T	CAAGCCAGTGGGAATCATCTTCACCGTTTCTATGAGTGCAATCTTTCTGGGGGAGAATTT[C/T]GGCCTTGGAAGGTAAAGCTTCAAAACTAGAGAACATGTTCTAGCAAAGAGAAAATGACAC	Y	A	1	1	Y	CDS	0.479	0.339	0.429319	0.193	0.445
BARC_1.01_Gm01_3550562_G_A	Gm01	3550562	G	A	ATTTGTTTCTAAAAAATTTAAACTAACAGTACGTTAAGAGAATATTATATTTGAAAGTGT[G/A]GGTTCGATTTATGTTCTCCATAAAGGGTGAGGTGTTGGACAACAAAAAATAAGACAAACA	Y	C	0.889	0.68453	Y		0.071	0.25	0.160428	0.313	0.213
BARC_1.01_Gm01_3555998_T_C	Gm01	3555998	T	C	CCCGATACCTCATGGGTTTAAGTTTATTGTCCCATTCCCGTACCCGTCGGGTATCCTCAA[T/C]CCCGTCTCATACACGATTCAAATTAGAAAAATATTTTTTTATGTAAAAAAAAAAATTAAA	Y	C	0.434	0.33418	Y	Intron	0.116	0.239	0.176136	0	0.183
BARC_1.01_Gm01_3560297_T_C	Gm01	3560297	T	C	GTAGAATGCGACGAGGGTGGCGGTGTGGGGCATGAGGGACCTGCGGTCGAGGAGGTACTG[T/C]TTGACAAGGAAGGCGAGGAATTTGACGTAGGGTTGGGGGAGGAGCATGGACTCGGCGAAG	Y	A	0.824	0.824	Y	CDS	0.151	0.01	0.0740741	0.495	0.231
BARC_1.01_Gm01_3562750_A_G	Gm01	3562750	A	G	ATCAATTATACAGGTTGGTCCTTTTATAGTTTTATTCACTTGTATGTACAGGTTTTTGTG[A/G]ATAAATTGATCCTTCTCTCCCAGGAAAGTTAAACTAAATTGTGTAATGTATGGCTCACAT	Y	C	0.935	0.71995	Y		0.125	0.25	0.184211	0.16	0.18
BARC_1.01_Gm01_3567424_A_G	Gm01	3567424	A	G	AATATAGTTTTGACTAAATGAAATTATCAATTAAGCATACATGTACCTGGAGAAGAAGGT[A/G]GTGTAGAATCAGAAAGAGAAGACTGTGAGATGATGGTGGTGGGGGTGGAATGAGGAAGCT	Y	A	0.839	0.839	Y	CDS	0.474	0.339	0.405263	0.01	0.401
BARC_1.01_Gm01_3569587_G_A	Gm01	3569587	G	A	GTTGCTAGGTACACCAGGAATATGTTGGTGCACTCAGTATTTTCTTATTTTTCCAATTTT[G/A]TCCTTCATTTTTACGGAAGAACTTTATTCATAAAATTTTGTTTAAAAAATATTTATAACG	Y	C	0.69	0.5313	Y		0.474	0.339	0.405263	0.185	0.459
BARC_1.01_Gm01_3571070_T_C	Gm01	3571070	T	C	ACTTTAATGGCAAATGGGTCCGTGACAAGAGAGGCCCTTTGTATAGTGGCACTACCTGTG[T/C]CACAATCGAAGAGAGCCAGAGTTGCATCATCAATGGGAGGCAAGACTCCACATACCTTCA	Y	B	0.878	0.72874	Y	CDS	0.474	0.339	0.405263	0	0.398
BARC_1.01_Gm01_3573916_C_A	Gm01	3573916	C	A	TATTTGTGGAGAGGGCATATGAAAGAAACAAAAGCACCCGAGAATAGCTGCAAGTACAAA[C/A]CTAAACTACCATTCTCCTCAGCATGAAACAGAGTAACAGACAGTGACAACAAAGTCCAAC	Y	A	1	1	Y		0.474	0.339	0.405263	0	0.398
BARC_1.01_Gm01_3578137_T_G	Gm01	3578137	T	G	GTACAAAGGGCTTCCACTGTCACTCACCCATTCACCATTGCAATAGTCACATTTGGTCTC[T/G]TTAGTTTTTCCCTTTTCTGCAATGAAGTACAATCAAGTCTTGTAAGTTGTAACACATCCC	Y	A	1	1	Y		0.474	0.339	0.405263	0	0.398
BARC_1.01_Gm01_3580483_T_G	Gm01	3580483	T	G	ATCATAGTTTACATGCCTTTCCATTTATACAAACCTAATTACATTCATACTACATAAAAA[T/G]ACTTTTTAATATTGATTATTTAAAAGTTTCAACGCCAGTTTTATTACACAATTTTGTTGT	Y	A	0.765	0.765	Y		0.474	0.324	0.398936	0	0.403
BARC_1.01_Gm01_3581854_G_T	Gm01	3581854	G	T	CCAAAGATCTTTCCCAATGTTGATCCTCTTACCATCACCAATTCTCCACTTGAGACCCCT[G/T]CTAACCAACACGTGAAAAGCTTGGATACTTCGCCAATCAAAGCTTGAATTATGGCCTAAA	Y	B	1	0.83	Y		0.474	0.339	0.405263	0	0.398
BARC_1.01_Gm01_3583471_C_T	Gm01	3583471	C	T	TACTAATGTATAACTTATCAAAATAAGAATTAGCCACTTTATGCAAACCCTCTTGAAATT[C/T]CATGACTTCCCCCATTATCATCCAACAACTTATCAATTTTGTTCTGCTTCCTATAGGTTA	Y	C	0.988	0.76076	Y		0.344	0.281	0.3125	0.237	0.466
BARC_1.01_Gm01_3585713_C_A	Gm01	3585713	C	A	CACTTTTTTATTTTACTCTCTCACTTTCTCTTTTTGATTTTTAGAAAACCCTCCTATTGC[C/A]GGAGTCACACTCTAGTTTGTTTTAAAATAAATCCATTTTGATAAAAAGTTTGTAAAAATA	Y	B	0.667	0.55361	Y		0.474	0.339	0.405263	0.139	0.445
BARC_1.01_Gm01_3592025_C_T	Gm01	3592025	C	T	ATGAAGACCTAAAGCCCACTTCAACAGATATAATTATAAAGTCAGTCCAAGGGAAAAAGA[C/T]CACCACAGAATCCCCACTCCTAGGAGTTTCATTTACTCTCTTTCTTTCACCCCTCCTCTC	Y	C	0.748	0.57596	Y		0.183	0.267	0.229814	0.032	0.165
BARC_1.01_Gm01_3593836_T_G	Gm01	3593836	T	G	ACTCTTTCTAGTTTCTGAGGTAACACATCACAAGTGTGGCGGAAAAATTAATGCAATGAT[T/G]AGAAATGCTTTACTCTTCACTCCTTAGCTGTTCGTGCCATGTTTTTCATCATCTGGAGAA	Y	C	0.988	0.76076	Y		0.328	0.078	0.196809	0.279	0.382
BARC_1.01_Gm01_3596804_A_C	Gm01	3596804	A	C	TGTAGAAGTGGGTTATTCTCCAAATGCGATAGAAACATGGAAGCCACAAACTCCACTTAC[A/C]TGTCTTAGCAGCATTTTTCTGTTTATATAAGCGAAGCGATATGGACATGATTGTCGCATT	Y	B	0.965	0.80095	Y		0.453	0.328	0.389474	0.104	0.443
BARC_1.01_Gm01_3603784_G_A	Gm01	3603784	G	A	CGCATGCACATACCTGTAGAAAAAGAAGAAGATGATGAAGGTGGAGGAGGTGGAGGAGGA[G/A]AAAGAGAAAGGTGGTAGGTGGTGGTGGTGGAATGTGGAGTGAGGGAGAGAAGGTCGAAGT	Y	B	0.854	0.70882	Y	5UTR	0.401	0.318	0.357895	0.497	0.408
BARC_1.01_Gm01_3610068_T_G	Gm01	3610068	T	G	CTTTCCCACAACACACAACAGAAATAGACTTATGTTGCATTAAATTTATAGTGCAATCAA[T/G]ATTCCATTACACAATATTTTTTTGCACCTCATTAGTGCAGTGGAAGTGTATTTTTGTAAA	Y	B	0.935	0.77605	Y		0.349	0.281	0.314136	0.063	0.48
BARC_1.01_Gm01_3617837_C_T	Gm01	3617837	C	T	GTATCATTTTCATAGCAGGAATACATATTATACCTAAATCATTATAAGAAGCATTCTTGG[C/T]TTTTTCTCAGAGAGAATGCTGGACTCTTGGCTTTAACGCGAGTTGGTAGCCGAAGGGTTG	Y	C	0.9	0.693	Y	Intron	0.219	0.323	0.268421	0.345	0.297
BARC_1.01_Gm01_3620908_C_T	Gm01	3620908	C	T	CAAACTATTCCCTGCCTGAATTTTTCCTAGGCAAAGTACAAACAATGTTTATTTGGGTGC[C/T]GCAAGAGTTGTTTTTTGAACTGCACAGTTTTGCACGAGTCTGCACCTCTTACAAATTTTA	Y	A	1	1	Y		0.49	0.339	0.413613	0.06	0.411
BARC_1.01_Gm01_3631728_G_T	Gm01	3631728	G	T	ATACATAGTGAGATGTCATGTTAATATTTTTTTAAAATCTTGGATGCCAATTAGTGAATA[G/T]ACATGAATTGCACAATTGAAAAACTGAGAGATTAAATTTATAAAAGAAAAAAAAAACACT	Y	C	0.596	0.45892	Y		0.26	0.016	0.132275	0.164	0.149
BARC_1.01_Gm01_3638269_G_A	Gm01	3638269	G	A	TTCGTATGTTCCAGTTCCACTAGTAATACTGACAGTGCTACGTGATTTTTTGTATATAGG[G/A]TATTTGGAACTGATATAGGGTACAAAAAATTAAAGGCATCCAAGAGAGCAGAAGCTGAAT	Y	A	0.988	0.988	Y		0.458	0.339	0.439791	0.052	0.391
BARC_1.01_Gm01_3642602_A_G	Gm01	3642602	A	G	TACTTCAGCTTCAGTCACTCGAATTTTTTATATCCCTTTTTATTTCTCATCAAACGAATG[A/G]CATCTTCTTCTAGAAATCCTAGCTATTCATAACATGATATTGGGGAATCTCATTGCTATT	Y	D	0.464	0.31088	Y					0.016	0.016
BARC_1.01_Gm01_3644194_C_T	Gm01	3644194	C	T	ATTAATCCTTAGTGATGTCTACTGCATATTGAGATCCTACAATTGAATGAAACATCAATA[C/T]GCAATAAGTTGAGTTCTTGTATGCGTCACAGGTACGGTCTTTGCCATGAAGGAGTTTCAT	Y	B	0.8	0.664	Y		0.37	0.078	0.221053	0.454	0.336
BARC_1.01_Gm01_3645914_C_T	Gm01	3645914	C	T	GGAACTCGGGAAGCTTCTACTTCAACGATTAGGGTTTGCGTCGGGTCGGAGAAGATGAGG[C/T]GCACAAGAGACGTGGATAGACATTGACACGTGTCTCGCTAACGATCAACGTCCAATTATG	Y	C	0.976	0.75152	Y		0	0		0.185	0.059
BARC_1.01_Gm01_3664834_T_C	Gm01	3664834	T	C	AAGTGCATCTGGTGGAAGGACGGAGGTTTGTAGTTCGAAAGGACCATGGTGAGGACGTAA[T/C]AGTGAACAATGAAATACAGGGTGGATTCTGGACTCGTCCGGTAGCTGTAAATGATACGCA	Y	B	0.949	0.78767	Y		0.478	0.332	0.403226	0.016	0.401
BARC_1.01_Gm01_3666692_A_G	Gm01	3666692	A	G	AGTAGGCCAGTCACTAATGGCCTGGATCTTAGAGGGGTCAGGTTGTACGTCGTTGCCGGA[A/G]ACGACGTGGCCATAGTAATCGATTTGACGCTGGCCAAACAAACACTTAAAACATTTGAGG	Y	A	1	1	Y		0.337	0.078	0.202128	0.208	0.412
BARC_1.01_Gm01_3668496_T_C	Gm01	3668496	T	C	TTTCAAACTTCGTCAAATACTACGTGACAGAACTTCGTTGTACCAACTTGAATAATGCGC[T/C]GCGGGGGTCATCATAGAATGAAGGAGCGAAGCGAGTCTCAATTGCCTGGAGTAGAGTTGG	Y	A	1	1	Y		0.319	0.068	0.188172	0.207	0.398
BARC_1.01_Gm01_3674029_C_A	Gm01	3674029	C	A	TTCACCATCTCTCAGATCATAGGCTGAGGCCCGATTCAATCCAGTTGCATCAAGTGAAAT[C/A]TTTGAGGACCTATTTATTGCCACATCAGCGTGGTGGTGCACTTTCTCCTGATGTATTGAA	Y	A	0.768	0.768	Y	CDS	0.302	0.026	0.15873	0.031	0.122
BARC_1.01_Gm01_3677989_A_G	Gm01	3677989	A	G	TCAAGAGTGAAGCCTACCCTTGCAAGATCATCAACTTCTTTCTTTTGGCCTGGCATTTCA[A/G]CAGATATCAAAACCTTTGTGTCCCAATGTAAAACCTGTCAGCACAACAAGTGCATGCCAT	Y	A	1	1	Y		0.495	0.339	0.415789	0.016	0.403
BARC_1.01_Gm01_3690629_T_C	Gm01	3690629	T	C	TGCTAACCAGCCTCTCCTCTTTCTCTTGTCTATTCCATCTTTTCTAAGGTTTTCATTGCG[T/C]TACACTATACATGCAACTATGCAAGAGCGCCACCAAAACTTACCACTTTGTTCCACACCA	N	C	0.9	0.693	Unknown
BARC_1.01_Gm01_3704476_C_T	Gm01	3704476	C	T	TAGCATCGATTAAGATAACACTAACTTCAAATCTAAAAAAGCCACAACCTTTAATCCAGG[C/T]TTGCAACCAAACAAGAAACAACATCATCACCATCACCCATCACTGCATCGATCACCACCC	Y	B	0.899	0.74617	Y		0.477	0.281	0.378531	0	0.379
BARC_1.01_Gm01_3713345_A_G	Gm01	3713345	A	G	GTTGGTATTGCGGCGGTGCAAGGTAATAGGACATGTTGGCTACAATGGCTAGGCAAGCGG[A/G]GGCAACAACTGTTAAGCTCCGGCACCATTGGATATTATTGGATTGAAAATGGCTTCCGCT	Y	C	0.9	0.693	Y		0.479	0.339	0.429319	0.402	0.421
BARC_1.01_Gm01_3715007_G_A	Gm01	3715007	G	A	CTAGTGCATATGGATAGAATCTTTTTAAACTCTCATGAAAGTAAATTATATTAAGTTGAA[G/A]TATTTTACTAAAAAAAACATAGTAATATTGCATATGCCACATACCATAACCAATCTGGAT	Y	B	0.601	0.49883	Y		0.479	0.339	0.429319	0.207	0.452
BARC_1.01_Gm01_3716399_T_C	Gm01	3716399	T	C	CACCCAGCATGCACCAACAATAATGCTGGATGCACCTAACAACACTCGTGTTCGGGTGAT[T/C]TAGCTGTCATAACAAGCCCACCTCTAAGGTTTTTGATTTAGTATGACCCAGTCCAGATTT	Y	B	0.9	0.747	Y		0.172	0.253	0.210526	0.426	0.339
BARC_1.01_Gm01_3727267_A_G	Gm01	3727267	A	G	CATAGAGGATTGAGCTTTAAGGAGGCGCCGCTGAAGGAGGGTGTGAAGCTCCGTTCGGTC[A/G]GATAAGAGGGTGTCGACGGCGTCAATGGAAGAAGAGCCGTGAATGTAGTCAATCGTGGTA	Y	B	0.949	0.78767	Y		0.121	0.029	0.0714286	0	0.071
BARC_1.01_Gm01_3729052_T_G	Gm01	3729052	T	G	CACTGCAACAAATTTCCGTAAGTATGGCCGGAGAGTGTCATTCATGGCTGATTGGAAGGT[T/G]GAGGGCGCGTTGCAGAGACCGAAGGGCATTATGCGAAACTCGTAATGGCCCTGGTGTGTG	N	A	0.768	0.768	Unknown
BARC_1.01_Gm01_3731309_T_C	Gm01	3731309	T	C	TATATAATAGTTTTTGCCTACAAGATATTTTGCTCGAGTTTGTTATAACAGAATTTTGAA[T/C]TTAACAGCTGAAGGAACACGTGAGGAAATAAGACTAAGGAGTAGCTTCTAGAATGGCGCC	Y	B	1	0.83	Y		0.143	0.029	0.0737705	0	0.085
BARC_1.01_Gm01_3733739_T_C	Gm01	3733739	T	C	GTAAACTCAAGCACTCATAAATTACAGAAAGTTGAAAAATGATAACCCCTTTAAATGACC[T/C]AGATTTTGCAACATTGTGACAAGAGTGAGTAAAGTGTAGACGAATTACGTCGGAAAAAGA	N	A	0.868	0.868	Unknown
BARC_1.01_Gm01_3744200_G_T	Gm01	3744200	G	T	TAAGTCAACCCTGGATCGTATTGAAGATGCAATAGCAAAACTCGTAGCCAGCCAAATCCA[G/T]GTCACTGATAAGCTGGAGGACTTGCTCCTCCACGTCGCGAACCTGGAACACACCGCCACC	Y	C	0.738	0.56826	N
BARC_1.01_Gm01_3745276_G_A	Gm01	3745276	G	A	AAACACTCCGCCTCCTCGGCCAGGTGTCTCACCACGCCGTTGTCATCCTCGTAGACAGCG[G/A]CAGTACGCACAATTTCGTGCAGAATCGCCTTATTCATCATCTGGGCCTAACTCCACAACC	Y	A	0.617	0.617	Y		0.362	0.078	0.216931	0.092	0.18
BARC_1.01_Gm01_3746962_G_A	Gm01	3746962	G	A	CCGATCATCACAGTCTTAAGGACCTGATGACACAAGCGGTGCAAACGCTAGAGCAACATC[G/A]TTATTTGGCGCGTCTCTTAGGCTTTGACTACACCATTCAGTACCGTTCTGGGCATTCAAA	Y	A	0.878	0.878	Y		0.43	0.105	0.263441	0.306	0.281
BARC_1.01_Gm01_3762803_A_G	Gm01	3762803	A	G	CAAATCATTGTGAAATTTGAACACCAGGTTTGAAAATAAGTTTTTCTTATCTCGACCGTT[A/G]GGATATGTGAAATAATATTTGTGGAGGGGGAAATTCTCCTTGCACGCAAACAGTGAAATG	Y	C	0.505	0.38885	Y		0.479	0.328	0.424084	0.242	0.466
BARC_1.01_Gm01_3768106_A_G	Gm01	3768106	A	G	AGTTCTGAAGCAACCATGAGAAAGATTCAAGTACCTTAAATGTTTTAAATCACCAACTGA[A/G]GATGGCAACTTTTCTCTTTCCACAAAGTCAAGTACCCACAAAGAATAACATTTCAACATA	Y	B	0.988	0.82004	Y		0.339	0.068	0.2	0.437	0.282
BARC_1.01_Gm01_3770764_A_C	Gm01	3770764	A	C	AACTGTTAACGGTTTCAACATCAACAATTTAAGGCTACAGTACACGAATTTCTATACTTC[A/C]CTCACTGAATGGTCAGAACTCAAAAAAATTATGTGAACGAGCTCTTACCACTACCAGTAC	Y	A	0.889	0.889	Y		0.479	0.328	0.424084	0.168	0.442
BARC_1.01_Gm01_3775600_C_A	Gm01	3775600	C	A	TTTAGCCTTCATACAAAGTCCCGTGCGCGTCAGCTTTGCACTGCGATGCGTGCTTTTACT[C/A]TTGACGGCAAATCGATGGATGAGTACTTGTGCAAAATCAAAGGATATGTTGATGAACTTG	Y	C	0.854	0.65758	Y		0.182	0.26	0.219895	0.183	0.21
BARC_1.01_Gm01_3778803_G_A	Gm01	3778803	G	A	TTCGTCGGTGACCGTTTCGATGCCATGGATAGTCGTCTGGATGCCATGAATGCACGTTTC[G/A]TAGTAATGGACACTCGTATTACTTAGCTTGAAGATGACATGGGTTTCATTCGCCGTTGCT	Y	C	0.683	0.52591	Y		0.057	0.042	0.0471204	0.082	0.061
BARC_1.01_Gm01_3780479_C_T	Gm01	3780479	C	T	ACTTGTCTAACATTGATGCACTTCTCGAAGGACTACCGTCAGATTACACGCTGGTGATCT[C/T]TGTAATCGAGAGTAAGAAGCACACTTCATCTTTCATACCTTAATTTTGTCCGGGAACTAT	Y	B	0.748	0.62084	Y		0.307	0.068	0.184211	0.203	0.194
BARC_1.01_Gm01_3782133_T_G	Gm01	3782133	T	G	AGGCCCCAGCCAACCAAGTGCCATGCACACAAATTCTTCATCTCGTGGAAATGGTCCTAC[T/G]GGCTCCACCTAGATTCCAGACTCTAGAGCCAGTTTTCATGTGACTGGTGATTCGTAGAAT	Y	C	1	0.77	Y		0.057	0.042	0.0471204	0.089	0.062
BARC_1.01_Gm01_3783724_T_C	Gm01	3783724	T	C	CAGCTCATTCCCCCATCACCTCTATTTCTGTACCTCAACCATCCACTTCTGCACCTACCT[T/C]TATTCAGCCTCAAATTTCAGAGTCTACTACCCCTGCTGCATCCACCTCAAAGTCTATTTC	Y	B	0.822	0.68226	Y		0.479	0.328	0.424084	0.122	0.425
BARC_1.01_Gm01_3794977_T_C	Gm01	3794977	T	C	CAACCACCCAACACCATCGCATCCCACCTCCACCCAACCACTCAACACCACGGCTACAGG[T/C]AAACACTGAGGTGTGGTGTTGAGTGGTTGGGTAGTTAAATATTTTGGTCTGTTTGGAGGT	Y	C	1	0.77	Y		0.459	0.299	0.375	0.15	0.46
BARC_1.01_Gm01_3807804_G_A	Gm01	3807804	G	A	TTGCACGATGTGAGACTTCACCTCACACTTGTACTCTAATAATCTCCCCCCTCAACTGTG[G/A]GTCTTATCCACATGATAGTCTCCCCTTAAGCGGAGGCCATTTTCATTCACGAGTATTTCC	Y	C	0.8	0.616	Y		0.224	0.26	0.240838	0.497	0.33
BARC_1.01_Gm01_3809034_T_C	Gm01	3809034	T	C	ATGTTCAACATTTTCATTCTTACACAATGTGAAATTTCAGCTCACACTTGTACTCAACAA[T/C]ACTACTGAACCCCACAATCTTTGGCAAGTTTCATTCCATACAAAGTGAGACTCATTAGAC	Y	A	1	1	Y		0.479	0.328	0.424084	0	0.385
BARC_1.01_Gm01_3815736_A_C	Gm01	3815736	A	C	TTCCCACGTGTTAAGAAATAATAACTTGCATTCCTATGTCTTTACAACCCGTTGTATTCT[A/C]TACTGAACTTAGGGAGACAATGATCGATGTTCCTTCCTTAAATATGGTTCCAATGACTAT	Y	C	0.889	0.68453	Y		0.49	0.328	0.418848	0.073	0.412
BARC_1.01_Gm01_3832790_G_T	Gm01	3832790	G	T	AATCAAAACTGAGACTGAATTTGTCAATTCAATTTGTGCATACTAATACTAATATTTTTT[G/T]TTACAACATACTAATACTAATATAATTACACGAAACCTCATTTTCGTTCAAATGAGTCTG	Y	A	0.689	0.689	Y		0.49	0.309	0.410526	0.091	0.422
BARC_1.01_Gm01_3838841_C_A	Gm01	3838841	C	A	TAATTTCATTCTGCATACCCCTTTCAGGTTCCCTCTGGAGTTTGTTTCACTCTTGACATG[C/A]AACATTACAACTAGGCCTTTAGAAAGATAAATTTACCCTCACAATTTTATATAATCAGTA	Y	A	0.897	0.897	Y		0.49	0.323	0.416667	0.313	0.493
BARC_1.01_Gm01_3840559_T_C	Gm01	3840559	T	C	AGTTTAATTTATTTAAGGTGGAATCAGATGGTCTATAAGCACTTAATAATATTAATAGTT[T/C]CCACTTGGGTTTCTCTCCCTTGTTAAAAAAAGAGACATATTCCATGCTTAGGACATGATT	Y	A	0.988	0.988	Y		0.49	0.323	0.416667	0.303	0.49
BARC_1.01_Gm01_3842574_T_C	Gm01	3842574	T	C	TATTTTTAACAACTCAAGAGAATTGCTTCTTAGAGTTGCCCTAAGATACTTTAAGATTGG[T/C]TTGTTGGCATCAATATGTTACTCCTTTCAACGGTATTCAATTACGATCTAACCATAGACT	Y	D	0.868	0.58156	Y		0.49	0.309	0.410526	0.266	0.481
BARC_1.01_Gm01_3843615_C_A	Gm01	3843615	C	A	GAGCACAGTGCTTATTCTAGAAACCACATGAAATCTAATTTGATAACAACGTATCATCAA[C/A]TTTACCTCCCGAAATTCACTTTTAGTATCAGGGGCCAGGAATTGGGTGCTTACCGACACA	N	C	1	0.77	Unknown
BARC_1.01_Gm01_3846696_A_C	Gm01	3846696	A	C	AAGCACCCAAGCACTCAAGGAACCCTCGCTTAAAAGCTAGCTGTCAAGGGGGGTAACTAA[A/C]TCACTTATGTACTCCATCAAGTATCTCATACTACTTGGCGTGGGGCTTATGCACCCTATA	N	B	0.8	0.664	Unknown	Intron
BARC_1.01_Gm01_3848401_T_C	Gm01	3848401	T	C	AATACTAGTCATCAACTTTTTAAAAATTTCATACTTCCGTAAAAGTTCCTGATACAACAA[T/C]ACTGTTTGGGACAATCGCATTATGCCACAAATTCTGTGGACAGGGAAAAGGAAGACAGAA	N	A	0.9	0.9	Unknown	Intron
BARC_1.01_Gm01_3849981_C_T	Gm01	3849981	C	T	GCCTTTGACAGCTTTTCACGGAGGTCCATATGCCTCTTACTGCCATTGCTGTCAGCCTGC[C/T]CCAATGCACTTTTTCGCATGAGCTTCAATCGTAGATCATCTTTACCAATATGTCCACAGA	Y	C	0.889	0.68453	Y	CDS	0	0		0.029	0.01
BARC_1.01_Gm01_3854003_A_G	Gm01	3854003	A	G	GATGAATTGAGAACTAAGGTTAAACAATGAGCTTGGGGTTCATTAATTGAATTTGAGAGC[A/G]ATGAAGAAAACGAATCGATATATTGGACTTTGCAGTTTGGACTTTGTGTTCCTCTTAAAA	Y	B	0.965	0.80095	Y		0.276	0.313	0.293194	0.153	0.482
BARC_1.01_Gm01_3884007_A_G	Gm01	3884007	A	G	ATAATAAACTTTAACCTGTTGGGTATCGGATACGGGTATGCAAATATGTTGGGGAGTCGG[A/G]ATAAGTGATTCAAGAGACAATAACCGTACCCGTCCCACCCATTGTTATGTCTACTCATTT	N	B	0.768	0.63744	Unknown
BARC_1.01_Gm01_3892595_C_T	Gm01	3892595	C	T	ATATCTTTAATTCTAAACAATATTATAGAAATAAAACAATATCCTTTTTTAAAATTTAAA[C/T]AATATCCTCCATTGGAACATGACACTTTGACTATCACATTGCCAAGTACACTTTCGACAC	Y	C	0.988	0.76076	Y		0.168	0.26	0.21466	0.197	0.209
BARC_1.01_Gm01_3896555_A_G	Gm01	3896555	A	G	GGTGGTTTGGGGTTGTTCTTCGAGGAAATGCGGTTTTTGTGGGGTGAGGGAGGGGACAGA[A/G]GGGAGGCTTGGTTGTGAAGAGAGGGAGGATGAAGTTGATGACTCGGAATGAAGGTGATGA	Y	C	0.854	0.65758	Y	CDS	0.151	0.26	0.204188	0.191	0.202
BARC_1.01_Gm01_3901917_T_G	Gm01	3901917	T	G	TGAGGTTTGTGTGGGGGAACCACCGGTGACCGGCTTTCGGATATGACATGTTGTCGTCGG[T/G]GAAGTTGTAGTCAATGTTAATGTCGGGGACGCCACATCGTAGGAACGACATTTGCTGAAG	N	C	0.839	0.64603	Unknown	CDS
BARC_1.01_Gm01_3905200_A_G	Gm01	3905200	A	G	GTTCGTATATTTTCTTTATCACTTTCATCATCTCTTCTACCTAAAAGTTCAAGAAGTACT[A/G]TCTGAGCTACCGGAGCGTCCATTGAGTGTAGGCATAGGGAGACAAGTTGAACTGCATCTG	Y	B	0.949	0.78767	Y		0.38	0.26	0.319372	0.435	0.404
BARC_1.01_Gm01_3910902_A_G	Gm01	3910902	A	G	AAGATGAAATCATACCTTTCTGCATTCCTATTATTCCTTCTCCTCCTTAAGCTTGTTGAT[A/G]AATCCATCTCTTCACGTGTCCCTCCTTCTTCAACCAAAGTAATATTCAAGAAGATTGGTG	Y	B	0.9	0.747	Y	CDS	0.146	0.26	0.2	0.253	0.221
BARC_1.01_Gm01_3916073_A_G	Gm01	3916073	A	G	TACCAACTTGGTCGTGTGTCAATTGAATTTAATTAGTCTTTTAAGTCTCCTCAAACTATC[A/G]CTCTTGAAGACGAGAGACTATGTACCTTCTCAATCATATATTTACTGAGTTGTTTGATTG	Y	C	0.965	0.74305	Y		0	0		0.302	0.228
BARC_1.01_Gm01_3926083_T_C	Gm01	3926083	T	C	GGTTAGTTCTTGTGTCCCCACCGGCCACCGCGGCTGGCCGTCAAAGAAAGAATAATGCGC[T/C]ACCGTGTGGAACGTCGGTGAATCCGTGGTGTTTGTCTTGCCGGAGTTCATTGTTGTGGTT	Y	B	0.915	0.75945	Y	CDS	0.141	0.021	0.0802139	0.182	0.334
BARC_1.01_Gm01_3934997_A_G	Gm01	3934997	A	G	GCACCACCCTAGAAATTCTTCATCAAATATCTCAATTTTTGGAAATTCTGCCTTTTCCTC[A/G]TCAGAAGCTTGTGGGGCCTTGTCTAAGCAATTTTTTAACCATAGTTCATCATAACCAATG	Y	B	1	0.83	Y		0.168	0.021	0.0899471	0.221	0.138
BARC_1.01_Gm01_3954983_A_G	Gm01	3954983	A	G	CCTTCGCCGCGCACTCCATCCCGTTCTTCTCTCCGACCACCACACGCTATTATGTGCTGC[A/G]CGGCCCACCACGGCCCATTCAATTTCATTCTTTCTATGCACAATTTTTTAAAAAAAAAAT	N	C	0.9	0.693	Unknown
BARC_1.01_Gm01_3965066_T_C	Gm01	3965066	T	C	GCAAACTCCGAAGATTGACCAAAATCTCGCGAAATATCGTGGGCGTGTATTAATGCCTTA[T/C]TAGAGTAGCATAGTGTAGGGGATCAGAAAAATAAAAAAATGTGTTTGAGATCACACACCA	Y	B	0.9	0.747	Y		0.242	0.198	0.215054	0.029	0.477
BARC_1.01_Gm01_3973817_A_G	Gm01	3973817	A	G	GCGATTTTATTGGAGGTTGACTTTAATTAGGTGCACAAAATTAACATCCAATAAATGCAC[A/G]ACATGTGACGGTCAACGTTGACAAATAACAGTCAACGTCCAATTTCGAGGTTGAAAACAC	Y	C	0.48	0.3696	N
BARC_1.01_Gm01_3991181_C_A	Gm01	3991181	C	A	TGGGATCGTGCCACCTCACTCACATCCACGGGCCTCGGAAGTGACAACTTGCCTTAAGGG[C/A]ATGCTTCTTGTGGGCTTTGTTGACACAAGTAACCGTGTCTTTACCCAGAACTTGAGGCCC	N	A	0.834	0.834	Unknown	CDS
BARC_1.01_Gm01_3994472_G_A	Gm01	3994472	G	A	ATCCATCACCATCACCCCGGTGTTGAAATAGCACGGCTTGCGCGTGCTGAACACGCGCGA[G/A]AGTAGAGGGTCGTTCCAGAACTCGTCGGTGAAGTACTTGGTGAAGTTCGCGTGACAGTAC	Y	C	0.854	0.65758	Y	CDS	0.268	0.25	0.235632	0.479	0.347
BARC_1.01_Gm01_4002275_A_G	Gm01	4002275	A	G	CATAAATTAGTTGAAAGGTTCTTATAATAAGGGATGAAGGGAGTATTTGAAAAGGTGAGG[A/G]GGTTTAACACAGCGTTGTGATGTGTGAATAAGGCTTCTATCATCATTGGAATAGCTTTGG	Y	C	1	0.77	Y		0.221	0.453	0.38172	0.07	0.437
BARC_1.01_Gm01_4009261_G_A	Gm01	4009261	G	A	ACATAATCCTACATATTTAGACATCAAAACATGCAAAACAGGAATAAAGCCCAATGAGGA[G/A]GCTAAAAAAGGAGAGTCCACAGAAGCATCAACGTATAATGCAAGAACAGGAAAGGCATAC	Y	B	0.9	0.747	Y	5UTR	0.216	0.453	0.378378	0.095	0.449
BARC_1.01_Gm01_4013321_T_C	Gm01	4013321	T	C	TACAGTTGCAGAAGGCTCATAAATGTAACTGTTATTTTTCCCAGGTCGGACTTTGATACC[T/C]GCGGACACCAAACTTGCGCACACTGCAGCAAGCTGTGCAGGTTTTAGTTCTAGTAAAATT	Y	C	0.9	0.693	Y	CDS	0.221	0.453	0.38172	0.372	0.478
BARC_1.01_Gm01_4015109_A_G	Gm01	4015109	A	G	CTCACTTGATTCACACTCATCTAAAAGTTTGCAATTTTCAAGATATTGCACAGCCGCATC[A/G]CAACCCTTCCTGCTAAAAATAAACCAAATAGCTGGCAGCATATCCCTGGACTGAAGTTGC	Y	B	0.889	0.73787	Y		0.226	0.443	0.390374	0.361	0.385
BARC_1.01_Gm01_4019326_T_C	Gm01	4019326	T	C	CGCTGAAAATCCACAACAAAAACCAGCAACAAAATTAACTTCCAAATAACATTATAACAG[T/C]AACTCTCCCCACACTCACTGACTCAAACTCAAACACACACACAACAAAAAACGCAAAAAG	Y	C	0.842	0.64834	Y		0.219	0.448	0.382979	0.096	0.445
BARC_1.01_Gm01_4021131_A_G	Gm01	4021131	A	G	CATGACTTGAAGTCAAACTATATAATGGATGATTCTACCATGAACCCGTGTCCCAAATGG[A/G]CTCCAAATTTAGGAGGGATCAGTGCCACAAAGTACAAAGAAAAATAGGCAAAAGTAGCAA	Y	B	1	0.83	Y		0.188	0.453	0.363636	0.115	0.464
BARC_1.01_Gm01_4040736_T_G	Gm01	4040736	T	G	CTTGGCTCGAATGACCAAAGTTATGCAAGCACAGATGAAGGCTATCTGTCAAATGAATGG[T/G]AATGGAAGCACAGTCGTCACCAACTCGATTGCGCCTCTAAACCCTCAATACACGAGATTA	Y	B	0.839	0.69637	Y		0.189	0.448	0.37037	0.042	0.263
BARC_1.01_Gm01_4045456_G_A	Gm01	4045456	G	A	CTCAAAAAATCAGAGGCGCTCAATGGGAAACACTCGCTAAGTGCGGCAGTCGCACTTAGC[G/A]CGAGATCGCAAAAAATTAGAGTAGACTACCTCTTTAAAAGAGGAAAAAGGAAGGGGAAAG	Y	B	0.868	0.72044	Y		0.186	0.453	0.365591	0.465	0.434
BARC_1.01_Gm01_4048396_C_T	Gm01	4048396	C	T	TTAAGTTGTGGTGGAAGGGGGTTGATAATGAGATCAAAGAGTTTGCCTTGGATAGCCATG[C/T]CGTGGAATTGTGCAACCACTATGTGAGCACTGACAATGTTGTGAAAATGTATGTGAAGGT	Y	B	0.9	0.747	Y		0.195	0.453	0.368984	0.168	0.306
BARC_1.01_Gm01_4053080_G_A	Gm01	4053080	G	A	TTTGTTAAATGATGATTGAAAATATATGGATGTTATTACTGAACAAGTCATTCGGAATCA[G/A]TATCTTATTTTAAAAAAATATTTGTTAGATTACATTTGTCAAATTAAATGTCTAAACCAT	Y	D	0.695	0.46565	Y		0.198	0.447	0.370968	0.314	0.485
BARC_1.01_Gm01_4056360_A_G	Gm01	4056360	A	G	AACCACTCCTTCCATTGTTGGGTGTCGAAACTTCAAACATGGTGGCTGTTTAGGTTAGAG[A/G]TTGTGGTGGCACTATGGTAAGTTGGTGCATTGACGTTAATGGTGGTGCGGTGGTTTGGTG	Y	A	1	1	Y		0.258	0.052	0.149733	0.479	0.255
BARC_1.01_Gm01_4067670_C_T	Gm01	4067670	C	T	CATATGTCAAATTATTGGCATGTCCCGCCATTCTTATTGACGGCATGCTTCACGTTGGCA[C/T]GTCCCGCCAGCACCAATGGTGGTACCCCATCCTCTCTCCTACTCAGCCTATCCTGCCAAC	Y	C	0.566	0.43582	N
BARC_1.01_Gm01_4071873_T_C	Gm01	4071873	T	C	CTTGTCATTTTTTGTTGTTGGTTTTTCTCACAGGCACAGATGATGGTAAAAGTCAGTGTG[T/C]CACTAAAAGTTCACCCAATGTTGGCTTTAAGTCTTCTTCTAAAACAGTCATTGCCAACAG	Y	A	0.868	0.868	Y	CDS	0.153	0.442	0.354497	0.302	0.338
BARC_1.01_Gm01_4079992_C_T	Gm01	4079992	C	T	ATACATCAATCAATTGATCATCATCACCATGATTCAACCACAAAACATCATCATCATGAG[C/T]CCATCAACGACAGATTCAATTCCTTTGAGATTTCACCTTTTGAGGGATTAACCCAAGTAC	Y	A	0.889	0.889	Y		0.158	0.443	0.356383	0.052	0.259
BARC_1.01_Gm01_4083697_A_G	Gm01	4083697	A	G	TAAACCAAATGAAAAACAAAAAAATAAATTTAGTTGGACACACTTGTGGCTCTGGACAAC[A/G]TTACATATGAACTGAGTGAGTCTAACAAGGTAGTAATAGCATGACACCACGATGAGAGGA	Y	A	0.791	0.791	Y		0.158	0.442	0.356383	0.042	0.254
BARC_1.01_Gm01_4089325_T_C	Gm01	4089325	T	C	GATTTCGTTTCTTCGTCTCACATGCAGTCAATGTTCACAACAAAGGGGGATTATGGTTAA[T/C]GATTTGTCTTCATGGTTGTGGTTCACATGTTTTTGGGATTAGGGTTTTGTGTGATTTGGA	Y	C	1	0.77	Y		0.401	0.359	0.376344	0.332	0.483
BARC_1.01_Gm01_4090869_G_A	Gm01	4090869	G	A	GTTGCTATAATCTTCTGCTTCGACCCCTCCAATTGTGAAAGATAAAGACTAACCTCCACA[G/A]TACTTCCAAAACCTTGGTTTAAATATTTTGCCAAATCATCATCCCAACCCAAAAATTTAC	Y	C	0.768	0.59136	Y		0.401	0.359	0.376344	0.253	0.344
BARC_1.01_Gm01_4095760_G_T	Gm01	4095760	G	T	GCTTCAAAGCCCCGAACGGCACAAATCCATTGTGCGGCCGGATTTGCTTGACATCAGTCT[G/T]CTGAATGTGGTGCACCATTTTCAGCTGAGGGTGGGGTTTAGGTACCACAACATGCCTGAA	Y	C	0.824	0.63448	Y	CDS	0.151	0.438	0.354497	0.083	0.268
BARC_1.01_Gm01_4107932_C_T	Gm01	4107932	C	T	TGATTGATGGATACTGTCCCCCAGATGAAACACCACCACCAATACTTCGTCGACAACAAT[C/T]CACGTCCATAGGTACAAGTGAAGCACCTAATCTTTCCTTTCCCACGGTATGTCCAATAAT	Y	B	0.9	0.747	Y		0.421	0.37	0.392473	0.334	0.379
BARC_1.01_Gm01_4114838_T_C	Gm01	4114838	T	C	TTATCTTTGCCCACATGGGTTTTTCTTTTTTCATCTTGTGGTGGGAGTTTCGTTGTGAAA[T/C]ACAGCCTCTGACAGATATCATGCATGTTGATGATGATATGTGCCTCTAACAACATTGGCA	Y	D	1	0.67	Y		0.426	0.271	0.419355	0.271	0.48
BARC_1.01_Gm01_4118990_T_C	Gm01	4118990	T	C	TCACCGCCAAGTAACCATTAACGAAAGAGAAGGAAGCTTACCTCAACGACGGAAGCGGCA[T/C]AATGCGATGGAGACGTCTTCAATGCTGACAACAAAAGTAGCCAATTGCGGCGGCACGAAG	Y	C	0.8	0.616	Y		0.405	0.274	0.432432	0.018	0.386
BARC_1.01_Gm01_4120447_C_T	Gm01	4120447	C	T	CAGCTGCTGATACAAGTTCAACAATGAGAATAAGATAAACCTGAGGCTAAGTCAACACTC[C/T]TGTTATATATCAATGGTCTCAAATTTTGAAGTTGTCAAAAAATATTGCAAGTTTAGAGTT	Y	B	0.965	0.80095	Y		0.452	0.083	0.259459	0.221	0.44
BARC_1.01_Gm01_4142391_T_C	Gm01	4142391	T	C	CCATGTACCAGGTCCATTTCAAAATCCAGTCGCCATGTACTTCACAACTATTTCCATATG[T/C]AGTGAAAAATGACTATAATACTAGCCTCAGCAGTCAGAATGATGGACTGTAGAGTCTCAT	Y	D	0.889	0.59563	Y	Intron	0.363	0.079	0.218085	0.052	0.166
BARC_1.01_Gm01_4144585_A_G	Gm01	4144585	A	G	GTTTCGTTTCGTTTCGATTCGTTTCGCTCAGATCCGAGATCCGAGGCTCCTGACGGATCG[A/G]TGGTGTTCGGTTACCGGAGAATCGCCGACGGCGACCGGAGCAGCAGCAGCGGCGCGGAAG	Y	A	0.789	0.789	Y	5UTR	0.5	0.263	0.379679	0.335	0.482
BARC_1.01_Gm01_4154272_C_T	Gm01	4154272	C	T	AGTTGTAACAAGATTGGAGTAAAACTTGAGTTAAAGAACCATAAGTGGCAGTGATAATAT[C/T]TGTTTTCTTAGTTCTTATTTCATCAAATGATAACTTCGTTGTTTATGAAAAAATTTTAAA	Y	D	0.757	0.50719	Y		0.393	0.092	0.25	0	0.25
BARC_1.01_Gm01_4182822_A_C	Gm01	4182822	A	C	TTGCGCCTTAATATCACTGAGCCTCACTACCTCACTTGTGGAACTCATATGAAGAATGAA[A/C]CCATGTGTTGGACTATAATATTTCATAGGAGTTGACTTACCAGCCTCAACTATTGAGAAT	Y	A	1	1	N
BARC_1.01_Gm01_4186936_C_T	Gm01	4186936	C	T	TGACTTACATCCTCCTTTGTTGCTTCTACTTGTGTCTCATATTCAAATATTTCACCTTTG[C/T]TGTCTCTCTCACCATTGCTATTTTTGTGTATGTCCAACTGATCTAGAGCCACCAACCCTC	Y	A	1	1	Y		0.132	0.174	0.145161	0.463	0.291
BARC_1.01_Gm01_4195741_C_T	Gm01	4195741	C	T	ATTAATGCAATGTGGCTTGGTTTCCATTCAAAGTCCATTTTTCTTTCATTTTTTAAACTA[C/T]AATTTCTCCAAACAGTCACAATGCACCAATCAAAAAGAAAAGAAAAACTAGGCACGATGT	Y	B	0.772	0.64076	Y	Intron	0.468	0.109	0.315508	0.108	0.253
BARC_1.01_Gm01_4206169_T_C	Gm01	4206169	T	C	CATTGGCCAAAAAATAACCCCCACCAAAGTCGATCGAAAATAACCCTAGCCAACATCGTC[T/C]GAAAAATAATCTTAGTAGATGTCGACACAAAAACATCATTAGCTGATGTCGGTCGAGAAA	Y	C	0.899	0.69223	Y		0.333	0.161	0.412698	0.057	0.417
BARC_1.01_Gm01_4208616_C_T	Gm01	4208616	C	T	TATTTACTTCAAAATTATGAATTAGTTATGTTGCATTCCCTACTTTAAGTGGATTCTTAT[C/T]ACTGCTAGTGTACTGTAATAAAATTTATTACTTTCAAATGGGTTGTGCCATAAATATCTT	Y	C	0.809	0.62293	Y		0.473	0.068	0.256983	0.282	0.283
BARC_1.01_Gm01_4213351_T_C	Gm01	4213351	T	C	GCACACCAAGCTTTGCCACTTCTCTGCAAACAACGTTCCCTTTTCTATCCAACCCTTTCA[T/C]TCCAGATTCTACCACAACCACCGTTTAAAGCCCATAATCACCAATTGCCATGGCAAGGTA	Y	C	0.9	0.693	Y	CDS	0.469	0.083	0.301075	0.072	0.235
BARC_1.01_Gm01_4219169_T_C	Gm01	4219169	T	C	ATTATCTCATCAAGGACCAATGCTTTCCCAATAACCTGAATCAAAGAAAGTACCACAATT[T/C]ATAATATCCTTGAAAACACAGTATAACATCACCCATGAGGAACAATTTCAAACCTATTAC	Y	D	0.757	0.50719	Y	Intron	0.432	0.083	0.251337	0.292	0.272
BARC_1.01_Gm01_4264556_A_G	Gm01	4264556	A	G	AGTAATATAGCAACTTGTTTATATTTTGACTTGTTCATGTTTATTTTCTTAAAAACTTAA[A/G]ACTCGCATAATACTTTAAACAATATATAAATTCACATAAAGTACTAGGAATATATTTTTT	Y	B	0.548	0.45484	Y		0.419	0.079	0.245989	0.237	0.245
BARC_1.01_Gm01_4267470_A_G	Gm01	4267470	A	G	GAGAATTTCAAAGGAGAAATAAAAAGTCACGAAGAAAGGGTTCATTTGCCTGGTACTACT[A/G]CAGATCTAATTTGTGATTCAGATCCAGCACACATCATTAAAATCTGAGCTTGAGGGGTCC	Y	C	0.889	0.68453	Y		0.167	0.01	0.0842105	0.311	0.164
BARC_1.01_Gm01_4276007_T_C	Gm01	4276007	T	C	GCATGGGACTCCACCCGTTTTGTCTTTGAGGTTGCATGACATCGATACCAAGACAACATT[T/C]ACCTTTGTAACATTATTCTAGAGCAGAGCGTGGAGCTCTCGCCTAATCAGTATGATGAAT	Y	A	1	1	Y		0.37	0.073	0.216931	0.5	0.323
BARC_1.01_Gm01_4284360_A_G	Gm01	4284360	A	G	GTCTGATCCTCTCCTGTGAGAGTCATCACCTCTGGTGCTATTTGAAAGTTTGATGACAGC[A/G]CGCGGGAGAAGCTCATCTGCCAGCAACATTGCATTAGCCAGCAATGCTATCTGCTGTTCT	Y	A	0.9	0.9	Y	CDS	0.305	0.174	0.433862	0.333	0.489
BARC_1.01_Gm01_4288357_A_G	Gm01	4288357	A	G	TTGTTGTTGTTGTCGTACGTGGTTGTCTATGTTATGTTGTATGCATGCAATTGCGAAAAC[A/G]CCACGTTGCCGCAGAAGGTTCAATCCAATTGGCTATGGAGGATTAATGATCGACGAAATG	N	C	0.9	0.693	Unknown
BARC_1.01_Gm01_4290839_A_G	Gm01	4290839	A	G	TTCTAATCTTTTCTTAAATAAATATTGGTGACGATTCTTTTGATTTTCAATATTTTTTAT[A/G]TTGTCCCGTCACCATCCTAAATACAATAATAATTTGTGAACATGTAATATAGGAATAAAA	Y	D	0.858	0.57486	Y		0.307	0.174	0.433862	0	0.437
BARC_1.01_Gm01_4294186_T_C	Gm01	4294186	T	C	TGGACCCCACCATTCCTCTGACGATGTCGTTTTCAGCTTCCAAACTGAACTAATGAACGA[T/C]GCTAACCTCCTTCAGCTCCATGCCATAGCCACTGCGATCTCCTCTCCCTTTACTTTCCAT	N	B	0.81	0.6723	Unknown
BARC_1.01_Gm01_4314337_G_A	Gm01	4314337	G	A	AGTAAAAATAAAATAATACTTTTATAACTATTAATAATTGGTACAATAGATATCTGTGCT[G/A]TGCTAACGTAAGATCAAATGATACAATTGGTCCGCCCCACTTGAATTATTGTGTCGCGAC	Y	A	0.988	0.988	Y		0.297	0.16	0.433862	0.047	0.394
BARC_1.01_Gm01_4318884_C_T	Gm01	4318884	C	T	CTTTTCGATTCCCTTTTGAGGAAATCCGAGTGGAGTTCCGAGGAAGTTAGATGTTTTGGG[C/T]TTGTATTTGCAACCGGAGAAGAAAGGATGTTCTGGGTGTGGGTTGTTGTTCGATGGTGGC	Y	C	0.742	0.57134	Y		0.263	0.09	0.168478	0.143	0.412
BARC_1.01_Gm01_4324478_T_C	Gm01	4324478	T	C	GACTCTCCTTTTACTTAAGTTTCAAATTAAGTTTCAAGGCAAAATTGTGACAAAACTCTT[T/C]ACAATTAGGCTCAACTGAAAACCAAACAAGATACTTTTTCAATTTTTCTTGTTGAAGATA	Y	A	0.543	0.543	Y	Intron	0.156	0.089	0.116402	0.469	0.24
BARC_1.01_Gm01_4338915_T_C	Gm01	4338915	T	C	TGTTTTTGTTGCCCATTTCCCTCTTTTTCTTCCTTTGCACGTTGAGAATAGATCTGATGA[T/C]AATGATGAAGATCTGGGTCGATGGGTCTAGATGGATGCAAATCAGAGGTGTTTAGTCATG	Y	B	1	0.83	Y		0.242	0.07	0.152174	0.139	0.401
BARC_1.01_Gm01_4344574_G_A	Gm01	4344574	G	A	GGTCATGGTGGTGTTTGCATTGTTAATTTGAATTACCAGCCTTCCACTTGTACTTTGCTG[G/A]ATTTTCTCCCAGCATATTGCAAATTAAAAGCAATTTATATAGTTTTATTTATTTAGTCAA	Y	C	0.988	0.76076	Y		0	0		0.335	0.108
BARC_1.01_Gm01_4352725_T_C	Gm01	4352725	T	C	TATTGGTCTCTCTTCCTTTATGCCCTTGTTATTTTTTTTTATTTGTTGGATTGAGGTCTT[T/C]GTAAGGTGCTTTCTAGTCAGAGGCCGTTTTGTTTTGATTCTCTTTTTTTAATTTCTGTGG	Y	B	0.868	0.72044	Y	Intron	0.432	0.094	0.326203	0.321	0.46
BARC_1.01_Gm01_4365237_T_C	Gm01	4365237	T	C	AAGAAATTCTCCTATTTAAGGTATTTTTTTATTTTTTATTTACTAAATTACATGTTCCTA[T/C]ACAATATTATATGTTTTTTTTATTTAGTTTGGTTTCCTAAGGATTCTGTGTCAAATTAGG	Y	A	0.563	0.563	Y		0.415	0.1	0.252688	0	0.261
BARC_1.01_Gm01_4372542_C_T	Gm01	4372542	C	T	CCATGAGAAAACCCTCTTTTATCACAAGGGAATGTAAGTGTAGGAATATTAGGCAAAGAT[C/T]ATTCGATCTCAAGAACCAATTTTGGCCATGAATGTTTCCAGAAAGTTTATTCCAAAAATA	Y	B	0.935	0.77605	Y		0.12	0.042	0.0789474	0.141	0.102
BARC_1.01_Gm01_4382931_C_T	Gm01	4382931	C	T	ATTATCTTAGAATTAACAATTTTTTTAACTTTTTTAAAACAATAGAAACATATTTTAAGA[C/T]GCTTTTTGATAGAATTGATGTGGAATATGAGATTTTGAGACGGTCTAAAAACCATCGTGA	Y	C	0.809	0.62293	Y		0.275	0.061	0.155689	0.453	0.305
BARC_1.01_Gm01_4386858_A_G	Gm01	4386858	A	G	TTCCTCAACACCTTCTCCGGACAATAAGGCCTCACGCCAGTCCCTCATCTAATGGAGCCA[A/G]AGAAAAAAGATTGTTGTGTGAAAGGCCTCACATCCTTGTGATCTTCATATGGACATCATA	Y	C	0.738	0.56826	Y		0.177	0.047	0.10582	0.371	0.198
BARC_1.01_Gm01_4410459_G_T	Gm01	4410459	G	T	ATATATTATATGCTATGTTTTCATAAAAAAACAAAAAAAAGCTGTTGGGCTCAAACAGAG[G/T]CCCAACAATACAAAACGGACAGGAGATAAGGAAAGACACCCTGAAACCCTAACTATTACC	Y	B	0.9	0.747	Y	Intron	0.203	0.021	0.109948	0.073	0.1
BARC_1.01_Gm01_4417151_A_G	Gm01	4417151	A	G	TCTACAACAAGGTCCAGCCTAGATGCCTTGCTCAGCGCGCAGCTCGCGTTGAGCATGACT[A/G]AAGACGCAGGCGCTAAGCAAAGGCGTTATGCACGAGATTCAGCACCCGCGCTAAGCGGGC	Y	C	0.834	0.64218	Y		0.036	0	0.0157895	0.214	0.084
BARC_1.01_Gm01_4420826_T_C	Gm01	4420826	T	C	AGCGAGCTTCTCTCTCTTAGCACGTTCAGTTTCTATTTTACTCGCATAGCGCCTATTGCC[T/C]GCTTAGCGCGGGTGATGAATCTCGTGCTTAACGCCCTCGCTTAGTGCCTATGTCTCCAGT	Y	B	1	0.83	Y		0.036	0	0.0157068	0.192	0.074
BARC_1.01_Gm01_4437651_C_T	Gm01	4437651	C	T	ATTTAAAAATATAAAATATATTCAATACTTCTCGTGTAAAAAAAATAAAAATATAAGATG[C/T]AGTAGGAGAATTTGGAATTGTTATCGAATAAACATCCAAAAATAAATGTCGAAGACAAAA	Y	C	0.813	0.62601	Y	Intron	0.391	0.104	0.240642	0.416	0.367
BARC_1.01_Gm01_4442989_C_T	Gm01	4442989	C	T	ACTGTATATGTTTTTTATTTGTAGAATTCGGAGATAGACCTAATTGAAATTTTATACCAA[C/T]TCAGGCACATGTGTTTTTTAAGTGCTTTTACTCTTTTATTAAATTATCTTACTCAAATAA	Y	A	0.714	0.714	Y		0.354	0.104	0.223404	0.422	0.297
BARC_1.01_Gm01_4445283_C_A	Gm01	4445283	C	A	CTTCACATGTAGAAAGAGTAACAATCGATTGCTTCTTTGACATCCATGTGAAGGTAATGT[C/A]TCCCATGTAGAACACAAAGCCAATAGTGCTTTTGTGGTCATCCACATCTCGACTCCAATC	Y	C	1	0.77	Y		0.354	0.1	0.223404	0.242	0.413
BARC_1.01_Gm01_4451210_A_G	Gm01	4451210	A	G	TTCCATATGGTTTGCCTTCTCTTCAACTCTATTTCTACTAGGAGCTTTACATTCAAAAGC[A/G]TAATAACCAAACTTCTCACAATTGTAACATTTCACATTTGACTTGTCGTACCCCGATCTT	Y	B	0.781	0.64823	Y		0.354	0.1	0.223404	0.247	0.408
BARC_1.01_Gm01_4458303_G_A	Gm01	4458303	G	A	CATAATCTTCTTGATGATGATGATGAGATTGTGGTATGAATTCATATGATTAAGCATGTG[G/A]TTGTAGGCCTTCATCATGTATGTTGGCAACGACTGATGGACTTTGTTGTGGAGCTGAACG	Y	C	0.654	0.50358	Y		0.432	0.096	0.262032	0.166	0.467
BARC_1.01_Gm01_4460492_G_A	Gm01	4460492	G	A	TATATACATTTTCGATTACTTGATTACTTGTATCATTTGTTGGTGATTGTGGCCAGTACA[G/A]GGCATGCATGTTGCAAGATGATGAGAACGTATGACTATGTTTTCTATCTTCGTCAAAATC	Y	A	0.692	0.692	Y					0.352	0.352
BARC_1.01_Gm01_4463745_T_G	Gm01	4463745	T	G	GTCAACGCTATTGTCAATGAAGGAGGGTGGCTTGCGTATGGGTGGGATTTGAATGGCGGG[T/G]CCGGTGAAATTCGGGGTCTTGAAGATAATAGTAGCGGTGGAAATGGAATTGAGGGTAATG	Y	B	0.915	0.75945	N	CDS
BARC_1.01_Gm01_4474392_A_G	Gm01	4474392	A	G	CTCCTCCGCGGGCTCCGGCAAGGGGAGGCGGCGCTTGGCGGCGTCGTGGCGGGAAAAGTA[A/G]GCTGACCTGTCTCTCTTGCGACTCATTGTTGTGTTGTGAGGGAATATGTTACTGTGCAAA	Y	A	1	1	Y	CDS	0.463	0.109	0.281915	0.349	0.414
BARC_1.01_Gm01_4488369_C_T	Gm01	4488369	C	T	TGCCCAAGTGAGTGGCCTTCCTCTCTTGTCTCGTGCCCTAGCTCTCCTATTTGGTGCCAA[C/T]TGCTTTTTTTTGTTTCCCTCCTTTTCTCCTTTAAAACACAACACATTCATGTTTTTCGAC	Y	C	0.679	0.52283	Y		0.193	0.021	0.104712	0.039	0.085
BARC_1.01_Gm01_4514553_C_T	Gm01	4514553	C	T	CACTCCTATAAATACCAGGTTGCATTGAACCCTCATCATAATCCAACACATACTCCAGCA[C/T]AAGAGCAACACACTCATGCCTCTTTCTCTTTTGGTCACTCGAGCTTATATTCAAGCATAT	Y	A	0.81	0.81	Y		0.234	0.021	0.121693	0.492	0.254
BARC_1.01_Gm01_4515660_C_A	Gm01	4515660	C	A	TTCCATGCTCCTCGCCCTATGCCCCGGCATGTTCGCAAACAATCTGTGCAAAAAAAAAAA[C/A]CCCAGTAGTATGGATGAGTTGCACGAATAAGCCAAGGGCTATATCCAAATGGAAGAAATG	Y	B	0.719	0.59677	Y		0.208	0.448	0.326316	0.451	0.37
BARC_1.01_Gm01_4517478_T_C	Gm01	4517478	T	C	CTCTAGATTACCCTATTTCATGTGAAGAGGTACCCCTGCAATCCAACATCAATAAACTCA[T/C]AAACCTCCATCATTTGGCTAAACCCTATGATACCTCTTAAATTTGGAGAATTTGCACCTC	Y	A	1	1	Y		0.453	0.463	0.456989	0.289	0.461
BARC_1.01_Gm01_4518923_T_C	Gm01	4518923	T	C	TAAGAACCCAAATTCGTGGCGGCACCTTGCACTTGACTAGCACTTTAGGATAAACTTTTC[T/C]CCATACAATTAATCTCCTTGTGGCCATACTTACCACAACTAAAACAAATTGCATGCAACC	Y	B	1	0.83	Y		0.211	0.453	0.329787	0.174	0.281
BARC_1.01_Gm01_4532179_C_A	Gm01	4532179	C	A	CATGATGCATACATTTTAGGAATACAGGAGCATGTGTCCATCCTTGTAACCTTGAACCTA[C/A]TGCATGCTAGCTAATTTGATTATACCTAAGGAATTAGGGTTATATTCGTAGTGAGGAAAG	Y	C	0.9	0.693	Y		0.221	0.021	0.116402	0.398	0.215
BARC_1.01_Gm01_4550193_C_T	Gm01	4550193	C	T	AATTCAGAAGGAATATAACAACAATAATACATGTATATATAAATATTAAATAAAAATACT[C/T]ATATAGTATTTACATTAAAAAATGTATTATCAATTTCTTTGTATTACAAATCTTTTATAA	Y	C	0.455	0.35035	Y					0.118	0.118
BARC_1.01_Gm01_4551811_C_T	Gm01	4551811	C	T	TGCCTAGTTTTGATGGCAAAAAAAAAATCCAAAATTAAAATGTTGAATGAACAATGTTTA[C/T]GAAAGTAAATAGCATAATTATGTAAATTATTGAATTTTATATAAATATTAAAGTTTTACA	Y	C	0.505	0.38885	Y		0	0		0.088	0.029
BARC_1.01_Gm01_4554579_T_G	Gm01	4554579	T	G	AATGTTGCTTCATCAACCTTTTAAGCATTGGTCAAGCCTATAGGTGTCAACCTTGATTTT[T/G]CTTGGAAATAGAATTCCTTGAAGAACATTAACAATAAAAGGTTGTCACATGTAATTTTTG	Y	C	0.988	0.76076	Y		0.355	0.032	0.192513	0.389	0.333
BARC_1.01_Gm01_4565065_G_A	Gm01	4565065	G	A	TGGAGAATAAAGACCAGAGAAACAAGGGGGAAGCAGGGAGGGTGCTAGGGATAAGTATAC[G/A]GATAAGCAATTATAATAAAGAGGTAATTAGATTCCCCAAAGCAAAATATGCCCTTTTATT	Y	C	0.732	0.56364	Y		0.01	0	0.00520833	0.129	0.045
BARC_1.01_Gm01_4578464_A_G	Gm01	4578464	A	G	TGTATAGGAGAGTTGATAACTTGGAGGTCGTGGGGTACACAAATTCATATCTTGGTGGCT[A/G]CTTCGATGATAAGAGATCGACTTCTGGATATATCTTTATGATGGCTGGGGACGCAATATC	Y	A	0.683	0.683	Y		0.463	0.458	0.459893	0.021	0.318
BARC_1.01_Gm01_4582570_A_C	Gm01	4582570	A	C	AATTAATGATGATATCACTTTTTATGCTTTGTGTGTGTTTGTGTGTGACTTTCTCTCACT[A/C]ACTCTCAATTCAAAGCCTCCAACCTACGTACTAAGTTAATTACCTTTTTTTAAACAAAAT	Y	A	0.935	0.935	Y	Intron	0.484	0.458	0.470588	0.195	0.384
BARC_1.01_Gm01_4595776_G_A	Gm01	4595776	G	A	GTTGAGCAGAACGACCTGCGCGTTTCGCTCCTCTCTAACGGCCTCGCGAATTTCAATGAC[G/A]GATTTTCTCGAAGTTCGCGGGCCCTGGAAGATGGCGGCGGGTCGGCCCAGGACTTCACGG	Y	B	0.673	0.55859	Y	CDS	0.313	0.479	0.414894	0.174	0.339
BARC_1.01_Gm01_4604157_C_T	Gm01	4604157	C	T	GTACTTTTATAATAAATTTATTTTTCTAACTTTTAAAAATATATGAATTTAGTTCATATG[C/T]TTAATTTTGTAGTGATAAAAAACCATCATTAATTAAACGTTAAGGTGACGATACACTAAA	Y	D	0.612	0.41004	Y		0.494	0.447	0.474286	0.024	0.328
BARC_1.01_Gm01_4615353_G_A	Gm01	4615353	G	A	TAGACCCTTCCATTGTCTTCACAGGGTCAAGGCCCAAACTACTCCAGACGCTCCACCTCC[G/A]ATGATTCTTCCTCCAGCCACTTCTTCTACAAACGACAAGCCTTCTCCCTCTTCTTCTTAG	Y	C	0.739	0.56903	Y		0.207	0.016	0.106383	0.492	0.239
BARC_1.01_Gm01_4617466_C_T	Gm01	4617466	C	T	TTCCAATTCCCAATCCATATACCCTCCAAGGTTTTTTTTTTTTTTTTACTTAATGTGATC[C/T]GTTACTTTTGCCCTTTTCAGTTTCAATTTCTGGGGTTTGTGGGTTACCCGGTTTTATGGG	Y	B	0.9	0.747	Y		0.484	0.495	0.494624	0.301	0.439
BARC_1.01_Gm01_4628251_A_C	Gm01	4628251	A	C	AATTGATGTGTTGTATTTATGTTGGTGTTTTTGTAGCTGTTTAATTTCTGTTGTAGGTTT[A/C]GCGAAGATGGGACAAATGTTCAGTATGTTTGGTTTTGTGCAAGTGGAACAGTCAAGTGTG	Y	C	0.9	0.693	Y		0.191	0.021	0.10582	0.354	0.188
BARC_1.01_Gm01_4634345_A_C	Gm01	4634345	A	C	AAAATGAAAATGGGGATAGACCGAATAATGTACATCAAAAGTTTAAATACAATTGTTCAT[A/C]TGCACTTCTCAATGATGAAAATACTACCATTGACATATCATTGGATATTCTTATTGGCAA	Y	B	0.858	0.71214	Y		0.495	0.474	0.489362	0.105	0.365
BARC_1.01_Gm01_4635774_G_A	Gm01	4635774	G	A	CGAGAATCAACATAGCCAACAAAGTCTAAGTCTGAATAACTGATCACATCTTGATTATCT[G/A]TCTGTCTATACATAAGCATGTAATCTTTGGTCCCCTGAAGGTACCTCATCACTTTCTTTG	Y	C	0.448	0.34496	Y		0.458	0.479	0.489362	0.471	0.499
BARC_1.01_Gm01_4642545_A_G	Gm01	4642545	A	G	AGATATCTATTTCAAGTGCACGCATGCATTATCAAATCAATGGTTTATATCACCTGTCAA[A/G]GTAGAACAAACAATATTATAGCAACAACGTTTGGTTGGCTAGATCCAACATCATGTTTAT	Y	A	0.868	0.868	Y		0.458	0.474	0.492063	0.346	0.456
BARC_1.01_Gm01_4654310_T_G	Gm01	4654310	T	G	TGTTAAAAAGGACAAACACTTAGAAAAGCAACGTACGGAGCAGACAAAACACAAAAATAT[T/G]CTCTAAGCCTATGCAATACACATCAACCTCTGGACATCCTGAGTACGAAATACAGAGAAG	Y	B	0.9	0.747	Y	Intron	0.255	0.479	0.363636	0.132	0.292
BARC_1.01_Gm01_4659943_C_T	Gm01	4659943	C	T	ATCCTCTTTTCGCATGACAACATACGCGCACGCGCCGATGAGCACGTGGAACCACTCGCC[C/T]TGTCCGAACTCGCCCTCGGTGATGGTGGATATCATGCTTCTCACGTCGCCGCTCTTGGAA	Y	C	0.685	0.52745	Y		0.253	0.479	0.365079	0.364	0.368
BARC_1.01_Gm01_4662444_A_G	Gm01	4662444	A	G	AGGTTTTAGTGATTGTTTAGAGTTGAGAGGCTACCCTGGTCTGCCAGCTGTGTTTTTTTC[A/G]CTTTGGAGTTTGGGGAAACATATGTTTTGAGTAGTTTAATGCATGATGCTAATGGTTAAG	Y	B	1	0.83	Y	Intron	0.417	0.489	0.462766	0.358	0.48
BARC_1.01_Gm01_4694538_A_G	Gm01	4694538	A	G	GATATACATGTTTTTCTTCCGCCATGATGAGTTCTTCTTCCTCATGAATGGATGGTAACA[A/G]AAGATTTGGTGAAATGGGTGAATTGGGCTCTTGGATGGATAGTCTCTCTAGTGCCTTCCT	Y	A	0.9	0.9	Y		0.198	0.426	0.310526	0.17	0.266
BARC_1.01_Gm01_4720160_C_T	Gm01	4720160	C	T	AACCTATATTCTAGGAATAAAGATTTATAGAGAAAGATCTAAAAGGTTATTTGGACTCTC[C/T]CAATCTATGTACATTGATATCATCCTAAAAAGGTATAACATGAAAAACCCCAAAAGAAGT	Y	A	0.531	0.531	Y		0.302	0.443	0.371728	0.484	0.411
BARC_1.01_Gm01_4725835_C_T	Gm01	4725835	C	T	AATTCACTTTTGTATTATTTATATGTAACAAAAAGTTATATAATGGAGGCGTTTTTAAGA[C/T]TTCGAATATTACAATATAATTAATCCTTTTAATTTAATATTCTCATAAAAGTATAATCTT	Y	B	0.662	0.54946	Y		0.313	0.442	0.376963	0.446	0.445
BARC_1.01_Gm01_4726775_C_A	Gm01	4726775	C	A	AAGTGTTGGACGACTAAACATTGGTTTTCCCCATTAACATTTCGTACAAATTTGTTTCGT[C/A]CTATATAGCATAACTCATAAATTAAATCAATTCGACAATACATAAAAAGTTTAATGTGAT	Y	D	0.935	0.62645	Y		0.365	0.443	0.403141	0.129	0.443
BARC_1.01_Gm01_4740115_T_C	Gm01	4740115	T	C	ATTAAAGGACTAAGAATTTTTATTCCAAAAGTAGCTTTTTTACACAATTATAATTCCGTT[T/C]TATAAAACACACAACAAAATGATGATTATATTATAAATTAATCTTTGTTCCTTTATATAC	Y	D	0.662	0.44354	Y		0.375	0.452	0.412698	0.276	0.482
BARC_1.01_Gm01_4751264_T_C	Gm01	4751264	T	C	GTCTGAGGTGCCCGTGTCTGATCCAACCGTTGATTCGTTGCAGATATCCGCACCAATATC[T/C]GGAGCTAATGATTCTAAAGGAGTGCTTTCCGAAAAGGAGGTAGTTAGTAGGTCATCACAT	Y	C	0.9	0.693	Y	CDS	0.26	0.432	0.34555	0.094	0.467
BARC_1.01_Gm01_4758971_G_A	Gm01	4758971	G	A	ATGCGTTTGAAAGCGTATTGGTGGCGGTCACATTATGATTTTGTCACATTTGTTGATATC[G/A]CGGAAAATTGCGAATAAATGCGGCTGATATGGTCCCAATTGAATTCTTGGACAATTAAAA	Y	A	0.768	0.768	Y		0.26	0.432	0.34555	0.332	0.457
BARC_1.01_Gm01_4767509_T_C	Gm01	4767509	T	C	AAATTTTTATTTTTCGGGCCTCCCTCCGTCCATTGCGCTTCTTAGGGAAAACCAAAAGTC[T/C]CAAACCCTCCATCCTTCTAACCTTCGTCCATAGCTCTTCACGCTCACTCCAACCTTCCAA	Y	A	0.854	0.854	Y		0.316	0.443	0.378947	0.391	0.384
BARC_1.01_Gm01_4775969_A_G	Gm01	4775969	A	G	TGAACCGTAAGAGGTGTAACCGGCAAAGGCAGTGGCTTCGATGAGAACATTGACGATGGC[A/G]TATTTGAGGATGTTCCAACAATTGGGAGAGGCGGCGGAAGGAGGAGGGGAAGCGGAAGCA	Y	B	0.824	0.68392	Y		0.323	0.443	0.382199	0.349	0.472
BARC_1.01_Gm01_4777842_G_A	Gm01	4777842	G	A	TTGGTTGACGACAATAAGAGGAAGCTGAAAGATGCATTACATCATAAGCTACCATCATTG[G/A]TACTATGTTGTTGTACTTATGGCTGCCTCTTACTTATTGTTGGCTCTTCATCAATTTTGA	Y	C	0.988	0.76076	Y		0.323	0.443	0.382199	0.467	0.411
BARC_1.01_Gm01_4794529_G_A	Gm01	4794529	G	A	TCGCTCAACACTCGTAACTATGGGTGACCAAAGTTTTTACGGTCGACATTAACATAAGTT[G/A]TTTTTCACTGACCTTGGCCAATGTTTTTTTGGTCATAATTTTTTTGTATGATGTCAACCA	Y	B	0.431	0.35773	Y					0.016	0.016
BARC_1.01_Gm01_4802409_G_T	Gm01	4802409	G	T	TTTTTGGTCGACATTGGTTGGGTTTTTTTGCTGATGCTAGTTAAAACTGTTTTTTTTTTT[G/T]TTCGCGTCAGTTAGGGTTCGTTGGCCAACATTGACCATGACTATTTTTTTTTGTCAGCGT	Y	B	0.723	0.60009	Y		0.12	0.009	0.0681818	0	0.078
BARC_1.01_Gm01_4808173_C_T	Gm01	4808173	C	T	TTGCCAGTACAATTGCATCTCCAAAGTCGGTTTTGCTCATTGTGATCGGATCCAGGCCAT[C/T]GTCGAGGACCACCGTTGATCAAGGGGAAACATGCGGTCGTAGTTGTAGACGTCGGCGACG	Y	C	1	0.77	Y		0	0		0.116	0.038
BARC_1.01_Gm01_4829047_T_C	Gm01	4829047	T	C	AATCTATCAGTATACATATTTTGAAGATTTTCAATATGAAGGTTGGATTCCTCTTAAGAA[T/C]TCTCTAAAATTGCTCTCGTTTCAAAAAATAATATTTTGTAATATTTTTCTCCCTAACTGA	Y	D	0.765	0.51255	Y					0.1	0.1
BARC_1.01_Gm01_4832865_T_C	Gm01	4832865	T	C	TTGCTTTTGAAATGGGGCAGTGAAGTTCGAGTAGCAGGTTTCGAAGCCAGCAGGACTCAG[T/C]GACGACATTGGCAACACCGCGATACTCGGCCTCTGCGCTAGAGCGGGATAATGTTGTCTG	Y	C	0.771	0.59367	N
BARC_1.01_Gm01_4835798_T_C	Gm01	4835798	T	C	CCAAGAGTCTGATTTTGGGCAAGAAAAGCGTGTGGTTTTGGTCCCAAAACACCAGCACCA[T/C]GACCAGTAGCAGAGGGAACCCAGCCTGTGGTAGGGTATGGACATGGTGGTGGGTTCCAAG	Y	B	0.897	0.74451	Y		0.375	0.427	0.396739	0.383	0.482
BARC_1.01_Gm01_4840458_G_T	Gm01	4840458	G	T	TTCTGCAAGGGAGTGGTACTAAAACCACTTGGTAGGCGCATCATGTACAAAGCAGCAAAG[G/T]TATTGCTCCAAGGTGCGACTAAGAACCTCGGTTTGACCATTAATTTCTGGATGGTACAAG	Y	A	1	1	Y		0.333	0.442	0.386243	0.084	0.288
BARC_1.01_Gm01_4841672_T_C	Gm01	4841672	T	C	AAATGCCAGTTGTCGTCCTTCTTCTTCACCAAAAGTATGGAGGATGAGAAAGGGTTGTGG[T/C]TGAGGCGGATGAGGCTAACGGAAAGCATTTCAGTGACTTTTTTTTTCAATCTTAGCTTTC	Y	A	1	1	Y		0.333	0.442	0.386243	0.402	0.465
BARC_1.01_Gm01_4843336_G_A	Gm01	4843336	G	A	AGTTGTTCTTGAATGGCATCCAGCCAGAGGGTGAGGTCGTGGTGAGCGTCAGTGAGGGTT[G/A]ATTGGTTCTATGTGAGGCGAAGTACTGCCTCTTCTTAGTGATTTTGGAGCAAATATGGTG	Y	A	1	1	Y		0.326	0.442	0.38172	0.404	0.394
BARC_1.01_Gm01_4846673_A_G	Gm01	4846673	A	G	ACTTTTGCATATTGTATGTACTTGGATTGGGGAATACGAAATGATTGGGTTTTTGGCAAG[A/G]TGCTGCGTTAGTTTCTAAAGCCTGTTATAATTTTTTTTTTCATTCGGTTATTTGCATGAT	Y	C	0.988	0.76076	Y		0	0		0.118	0.04
BARC_1.01_Gm01_4852749_C_T	Gm01	4852749	C	T	GCTAAATAGAGGAACTTCTGGCAGGACCTGATATATAAAGCATTTGAAAGAAAATGATGA[C/T]AGAAAATTCTTATAATCATTTTTTATTGATTTTTAAAAATTTTAATTTGTCCTCAGATTA	N	D	0.868	0.58156	Unknown	Intron
BARC_1.01_Gm01_4866304_C_T	Gm01	4866304	C	T	AAACAACAAATTTAATCATATTTTCACTGATGAGCTCATCCTTGTCGACACCAACGCCGA[C/T]ATGTTCCGCGGCGAGAAGCTCGACCTCTAGCACGCCGCCACCTTCCTCCCCCGCACCAAG	Y	B	0.842	0.69886	Y		0.321	0.442	0.380952	0.145	0.304
BARC_1.01_Gm01_4871087_T_C	Gm01	4871087	T	C	AACCCAATCTCCTTAGCATGTACAACAAGAAGCTCCAGTCCACCAAATCGTATGCCTTCT[T/C]ATGGTCTACTTTAAAGACCAAACAACTTCTTTTTTCATTCTAGCTTCCTCCACAACCTCG	Y	B	0.9	0.747	N
BARC_1.01_Gm01_4873676_C_T	Gm01	4873676	C	T	CCACGTGGTCTTTAACGATCTTAACTCTCCTATGACAACTTTCTAACATATGGTTATTAT[C/T]TGGTGGGTAATATTTTGAACTTTTCACCCTAAACTCACTCTTTTCCTTCAACACCTTCCT	Y	C	0.965	0.74305	Y		0	0		0.155	0.05
BARC_1.01_Gm01_4912239_G_A	Gm01	4912239	G	A	TGGATCTGTTCAATATTTTTTTTAAAAAAAAAATCCAATTTTAGCACACTCCCAGCCGAG[G/A]TTATCTTGAAGGTGTGCCTGGTTGGGTGAAGGTGCATGCCCTCATGCAAGTACGGCAAAA	Y	A	0.949	0.949	Y		0.442	0.453	0.446809	0.15	0.421
BARC_1.01_Gm01_4915247_A_G	Gm01	4915247	A	G	GATACCCAACAGATACGGGATGAGATAATAAATTTTAACTCATCAAATATTGGGTATAGG[A/G]ACATGTTGGGAAGTCGGGTTTGGAGATTGGAGAAACAATACTCGTCCCCGTCCCGCTCCA	Y	A	0.657	0.657	Y		0.411	0.447	0.427807	0.484	0.464
BARC_1.01_Gm01_4926220_T_C	Gm01	4926220	T	C	CACCATTGCAGCTACCACCATGATGGTCACTAGCATCACTTCTATCATCATAATTGTTGT[T/C]GTTATCGTTGTCGTCACTATCATTGTCGATGTCAATGGTGCTGGCGGGCATGGACTAGGG	Y	B	1	0.83	Y		0.411	0.453	0.430851	0.471	0.465
BARC_1.01_Gm01_4929674_G_A	Gm01	4929674	G	A	TTCTGAAGCAGAATTTTCAGAAATGGTTAAAACTACCTTGGGTTTTTTTGTAATTTGATG[G/A]GTCAAGTTCAATCGTGGGCCTGGGCCTGGGCCTCACTTACAGTCCACCTGAGGAGAGTTG	N	C	0.813	0.62601	Unknown
BARC_1.01_Gm01_4933149_T_G	Gm01	4933149	T	G	TGTCTTAAATTTTCATTCAATTGTGTACGAATGTAATAATGAAAGCTGAACTCATGCGAA[T/G]GACATCGGATTGATATAAATTGGTGACATGGCTTCCTGGTTTCATGACAAAAATTGATAT	Y	C	0.9	0.693	Y		0.411	0.463	0.435484	0.316	0.483
BARC_1.01_Gm01_4943084_G_A	Gm01	4943084	G	A	CAGGGGATGGGGGGTCGATGCTTGATGAAGGATTTTCAGTGAACTCTGTGAGTTGTTCCT[G/A]CCTCTTCCTTTTCTCGTCCATAAGCTTTTTGTCTAGCAGTTCATACCCCCTCGAGATAGT	Y	A	0.768	0.768	Y	Intron	0.411	0.447	0.427807	0.219	0.36
BARC_1.01_Gm01_4954587_A_G	Gm01	4954587	A	G	TAAAAAAGATGCAATCACAATTTTCCATTTAACCAAGAGCAACATTCTTAGTTATGGACT[A/G]GGATTTCAAACCTCTTGACATTTTCTGTAAGACATTAACCACATAATATTTTAAATCATA	Y	B	0.935	0.77605	Y		0.419	0.447	0.432432	0.264	0.47
BARC_1.01_Gm01_4956371_T_C	Gm01	4956371	T	C	CAAGACCGTCTTTGTATCATCGCGAGAAAATTACAAGTTTGCCATCATATGCCTCATCAA[T/C]GACGGGCTCGTGGAAACGTCGTTATTTTGTTTGCTTTATTTATGAGAATGCCATTACTTG	Y	B	1	0.83	Y		0.411	0.442	0.424731	0.303	0.487
BARC_1.01_Gm01_4959862_G_A	Gm01	4959862	G	A	CGCTGCTTGACGCTTCATTTCCCCTCCTCTCTCAGTTTTTAAAGACTTTTGAGCTTCTGA[G/A]CTTACGAAGGCGCACTTAGTGAGCATGTCTCGCTGAGTGAGAGTTAGTGGCTGGGTGCTA	N	A	0.63	0.63	Unknown
BARC_1.01_Gm01_4971018_A_C	Gm01	4971018	A	C	GCAACAGAGGAGAGGATGCAGTAGTAGCAGTAGGTGGGCTGGAGATGCCTGTGTTTTGGA[A/C]AAAAAATACTTAAAAATCACATGTTAATCACATGACGAGATGAAGTTAGCGTCATTTGGG	Y	B	0.949	0.78767	Y		0.415	0.453	0.433155	0.174	0.437
BARC_1.01_Gm01_4975775_T_C	Gm01	4975775	T	C	ATTGGATCCAATCTCAATCCGTTTTGCCTCAATGCCAATTTCTCACTTCTACCTGAATTC[T/C]TCGAGTTTGAATAGTTTAAGCAAAAGAGGCCAGTGGGATGTTGTTTGGTGTGCAACTGCT	Y	D	0.9	0.603	Y		0.41	0.453	0.430108	0.229	0.458
BARC_1.01_Gm01_4976859_G_A	Gm01	4976859	G	A	GGCAATGTCTGCAAGAAAGAATTAAATGCATCATTTATAATATCAATTACTCTTTCTTCT[G/A]TCAAAGGTGCGGGAGTTGTGGAAGAAGGTATAGCCTTTGAAGAAGCATGTGTAGAGATAC	Y	C	0.714	0.54978	Y		0	0		0.195	0.063
BARC_1.01_Gm01_4985137_C_T	Gm01	4985137	C	T	ACATCATCATTACCAATACCAAAGGTATCACCCCTTACAGAAGGAAACTGGACTCCTGGC[C/T]AGGCAACTTGTACAGGCATTTGGTTGCTTCTTATCACTTCACTCATGCAAGACATTCCTA	Y	A	0.681	0.681	Y		0.404	0.453	0.428571	0	0.429
BARC_1.01_Gm01_4991694_C_A	Gm01	4991694	C	A	AAAAATTACACCGTAAGAAAAATAATAATAAATACAAGAATTTAACGTGGTCCGACACCT[C/A]TTGTCTACGTCCACAGAGCCGTCTCAAAAATATTTTCACAAATGATTACAAGATTATAAC	Y	D	0.57	0.3819	Y		0.135	0.453	0.293194	0.226	0.457
BARC_1.01_Gm01_5003945_G_T	Gm01	5003945	G	T	GGGTAATCTAACTAGTTTGCCTTAGTTAAAAATGTTATTAAATATTTTTAAAATTAATAT[G/T]ATGTTAATTATTTTTTCATTTCACTTGGCACTTTTTATTTCAATTCTATAACTAATGCAT	Y	C	0.606	0.46662	Y		0	0		0.403	0.125
BARC_1.01_Gm01_5044640_G_A	Gm01	5044640	G	A	GAATTCATAAACTAGAAGTGTGTATAGAGCTTGAATGAGATAAAGGCCCAATTAAGAATT[G/A]GGTCAAAAAATAGAGGAAAGCCACCCCTTCTTTCACCAACAAAAGAGGAAAATCTTTTTG	Y	D	1	0.67	Y		0.4	0.5	0.448649	0.117	0.343
BARC_1.01_Gm01_5077147_A_G	Gm01	5077147	A	G	TTTTCATTTTGCTTTCCATTTCTTATTTTACTATGTTCAACTCTATGTATTTCTCTATCC[A/G]TAAAGTATATTGAATGTACAGAAATGGTTATATTAGAGTTTCTTTGCTAATATTGTCACA	Y	A	0.402	0.402	N
BARC_1.01_Gm01_5083006_C_T	Gm01	5083006	C	T	CAACATAAAATTTAATCTAATAATTTCATGTTTAAATATGTTTTGTAAATTAATTATTAG[C/T]GGGACGGGTTCGGGGTGGGTATTATTAATCCCATCGCCGATCCCGAACCCGACTTTAACT	Y	B	0.604	0.50132	N
BARC_1.01_Gm01_5098205_G_A	Gm01	5098205	G	A	ATATAATTAAAACAATTAATCAGGCATTACAAAAAACATAATATTACATAAATCAAACAT[G/A]GTGTAACATATTAATTCTTTTTACTTTTTTAGATATATGTTGGTAAAGTTTACTAGGGTC	Y	C	0.513	0.39501	Y		0	0		0.492	0.173
BARC_1.01_Gm01_5110019_A_C	Gm01	5110019	A	C	CTTTGATTATGCCACCTCTCCCCCAAGGGTGTGCAACCCCTTCATTTGTGTTGTCCCTCC[A/C]CCTGCCACGACAAATGCAGCTCGAGAAGCCGATTATTTGAGGCCCCTACTCGCAATGCCA	Y	C	0.915	0.70455	N
BARC_1.01_Gm01_5111010_G_A	Gm01	5111010	G	A	GGCGAAGCAATTCAGCGCTCTTCCGTACATTATCGCCGGCGAAGTTCCGGCGACTAGACG[G/A]TGGTGGTCGAGCCGCAAGTCCCGGAGCGGCGAGGACGAGTGGAACGAGGCGTGGGAGACG	Y	C	0.834	0.64218	Y	CDS	0.353	0.351	0.351064	0.168	0.292
BARC_1.01_Gm01_5115858_A_G	Gm01	5115858	A	G	TAACTTTCTTCCTTACTTACATCCTTTGAATGATCTTTCTTCTTCTCCAAATGGTACTCG[A/G]CAAGCTAAAGGGTGGGATACCTATAAAAGACACTCTGACGTTCAAGTAAAGTCTTAGTCA	Y	B	0.7	0.581	Y		0.43	0.388	0.478495	0.06	0.366
BARC_1.01_Gm01_5117290_C_T	Gm01	5117290	C	T	TATCTCTTTATCTTTTAAGAGTCATATAGCACAAGCAAAGTTTTAAATTGCAGTTGTGGT[C/T]AGGGTTGCAATCCTTGATGTTGTGGGAAATTGCATATAAGTATAGTGGTTGCGGTCGCAA	N	B	0.629	0.52207	Unknown
BARC_1.01_Gm01_5118236_G_T	Gm01	5118236	G	T	CCTTGAATCCTTAATTTTATTTTCTTATCTTATCTCATTAAGAAAAAAACCATTTTAGAT[G/T]CAAATATTCCAGAATAATTCATAAATTAATAGTTAACTGTTGCGAATTGTCCTTTTGCTC	Y	D	0.406	0.27202	Y					0.035	0.035
BARC_1.01_Gm01_5123518_C_T	Gm01	5123518	C	T	AGGAATTGGTCAGAACCAATTGACAGAGACTAAGCTATGTGAGAGAAGTCTTAGGTAGAT[C/T]AGTGGATGACTGGTACGATACACAATCTTTCAGCCTTGAGTATTTAAGTACAAAAAGGCT	N	A	0.988	0.988	Unknown
BARC_1.01_Gm01_5124760_G_A	Gm01	5124760	G	A	CATCGTCACCGTCATTGTTAAGCACTCTCACCGTCATGTCCTCCTCAGTTGCTATCATCA[G/A]TCACTTCATGGCTTCCTAGCTTCGCACAACCCTTTCTCATATTTTTTCCTGGCTTCTTGG	N	B	0.842	0.69886	Unknown
BARC_1.01_Gm01_5127125_G_A	Gm01	5127125	G	A	TTACATGGATTGAAGTTGGATGAATGCCAATTGCATGAGCTCTGTGTATGAGGAAGGAGC[G/A]GAATGGTTCTTGGAATTCGCCTTCGAAAGAAGTCGACCGGATGAGGACGAAAAATATTTT	Y	B	0.53	0.4399	Y		0.432	0.388	0.478723	0.445	0.468
BARC_1.01_Gm01_5132319_G_A	Gm01	5132319	G	A	GATGCTACCGTGTTTGGGGTGTATAATGACAACTTCCCCTTGTATACATTTTAACTCATT[G/A]GCAAGTACACTAATTCGTCAAAGTAGTAATCTAACACGGTAAAACCAAGTATTGCTTCCA	N	C	0.694	0.53438	Unknown
BARC_1.01_Gm01_5144235_T_C	Gm01	5144235	T	C	TTGACGTAGTCTTAGTTGTTTTTGGGATGACTGACAGCCTGGTTCTGCAATGCAAGACCC[T/C]TATTTCGATATTTTTATCTGAAATTCTTAGCCGTTTCTTAGATTGATCAGGGTGACAGTA	Y	B	0.897	0.74451	Y		0.442	0.396	0.47619	0.416	0.458
BARC_1.01_Gm01_5159361_A_G	Gm01	5159361	A	G	GAAAGGTGTTTGATAATGCTGCCACAATGTACACAATGTCCCGTCTTCATCACTTACGCA[A/G]ATGATGTGGTCAAGGTCAGTGTTGTGATTGTTTACGACAGTGACGTGATGGTCCCATTTC	Y	A	1	1	Y		0.442	0.396	0.47619	0.425	0.461
BARC_1.01_Gm01_5178808_C_A	Gm01	5178808	C	A	AGGAACCCTAGGGACTCTGTGTGAGCGACTGATGTTGGATTTACCCTACTATCACAATTG[C/A]CTTCGCGCATCTTTCACGAGCTTCTAGTCGAATGAGTTTTCTTCTTAAATGTGCAAGTGC	Y	B	0.514	0.42662	Y		0.333	0.365	0.348958	0.133	0.277
BARC_1.01_Gm01_5181999_T_C	Gm01	5181999	T	C	TGGTCTTGGTTGTGCAGCGGGTGGATTTTATGGTCGGTTAAGTGCTCTTGGTTGGTAGGG[T/C]GGTGGGTAGTGGGCGGGACTGATATTGGCTAAGTAGTGACATTGGTGGGGAGGTGATCGA	Y	B	0.799	0.66317	Y		0.436	0.395	0.478723	0.011	0.351
BARC_1.01_Gm01_5184261_A_C	Gm01	5184261	A	C	TACAATAGTGAGCGGTGTATAATTGGGAGGAAAACCATATGGTGGAAAAGAATATCTACT[A/C]TGGACCCAGACATAATGAGTCTCATATGCGTTGGTCGTCGCCGTGCCTCCCTAACCTCCT	Y	B	0.789	0.65487	Y		0.326	0.351	0.338624	0.337	0.338
BARC_1.01_Gm01_5185307_T_C	Gm01	5185307	T	C	AGGAGAATGCAAGGCATGAGCAAATATATGTTAGGATCATGCATGAGTGAACATGGCATG[T/C]GAATGACGACGACAGAATGTATGATTATTGTCTGAAAAACATGCTAAATGGATATGTATG	Y	C	0.748	0.57596	Y		0.328	0.351	0.338624	0.364	0.348
BARC_1.01_Gm01_5201726_C_T	Gm01	5201726	C	T	AATGGTGTCAAGGTACGCTTTAAATGAAATTTCGGTTGAGTTTGATCGCGTACGTCATTT[C/T]AGAGACAATTCGTCTTGTTGTGGTTGTGTCTTGAGAACCACGCTAGGTCTTCCTTATGCA	Y	D	0.436	0.29212	Y		0.33	0.365	0.347368	0.378	0.358
BARC_1.01_Gm01_5203753_C_T	Gm01	5203753	C	T	GAATGACGTGACACGAGGTTGCTTTAGTTTTACGCTTCAAAATGTAAAATAGTCACGAGT[C/T]TGGTAAAAGTGAAGCCACGTGCCTGCCTGGGCCATCTATATAAATGACAGATGGGCATGC	Y	A	0.448	0.448	Y					0.016	0.016
BARC_1.01_Gm01_5206625_T_C	Gm01	5206625	T	C	CCGGGAGGTGGAAGCTGCTAGTCTTCGGATGCCACCTCTCGACAAAGGCGGATATGAGTC[T/C]AGGATCACTAGTTATAACAGAACACTATATCAGTGGACTCAGTCCGGTAGCCGCAATCAC	Y	A	0.9	0.9	Y		0.328	0.342	0.331551	0.358	0.346
BARC_1.01_Gm01_5209506_A_C	Gm01	5209506	A	C	TTTGTTAACTTATCCAATATCTCATGGACTACTAATGAGGATCTATTTAACTGAACAGAT[A/C]TTGTGACAAACCATTATAAATAAGTTATTGGTGATGAATTAATTATCGAAGTTCTATTAC	Y	A	0.899	0.899	Y		0.332	0.359	0.343915	0.378	0.358
BARC_1.01_Gm01_5211157_C_T	Gm01	5211157	C	T	GTACTGCGCCATGCACTACTTCCTAATGCATGGACGACATTCATATAAATCATAATGATG[C/T]AATACAACAAGGCTCTCTATAATGATCATCAATTTCTGCGTCACACCTAATGAAAGATTA	Y	D	0.965	0.64655	Y		0.328	0.359	0.342105	0.378	0.357
BARC_1.01_Gm01_5214386_G_T	Gm01	5214386	G	T	GCATTAAGGGCCGCACGCACTGCCTAAGTTACTTTCACTTAGAAGTTGAGAACCACTGTT[G/T]CCGCCACCACTTCCGCCCCCAACCATGGCGGAACCTAGTTGAGCTCCGGGGATAAGGTTC	N	C	0.9	0.693	Unknown	CDS
BARC_1.01_Gm01_5216774_T_C	Gm01	5216774	T	C	TTCATTTTCTTATTCGTCGATCTCATTAGGAATGCGAGTTGAAATCGGGACCACCCTTTG[T/C]CATCCTCTTTCTCCTTTTCAGCCATAAATAATAAAAAATATAAATTCTTATCACTTAAGC	Y	B	0.436	0.36188	Y		0.448	0.409	0.481481	0	0.481
BARC_1.01_Gm01_5231564_T_C	Gm01	5231564	T	C	CTGGTATTTTGTGATAAACTTAATAACCAAGAATGACATACTGAAGCAACATCATAGTCG[T/C]TGTCTACCTTGAAGCAGACAAGAAAAGCCACACGGCTAAGATCATTGGCAACTAGACCAG	Y	D	0.694	0.46498	Y		0.438	0.402	0.483871	0.452	0.496
BARC_1.01_Gm01_5238004_A_G	Gm01	5238004	A	G	AGTTGTTATAGAAAATCTATTATTTATGTCAGGAATGAAGTGTAATTTGATGAGTGTTGG[A/G]TAGCTGGTTTTGACGGGCCTAAGCCTAGCCCGCATCATTATCACTAAGCCTAATTCTGGC	Y	D	0.949	0.63583	Y		0.442	0.379	0.468085	0.375	0.481
BARC_1.01_Gm01_5239187_G_A	Gm01	5239187	G	A	TGCCCTACCAAGAGACTTAAAGAGAAGGTACCAAAAGAATATTGATCTAGCAGGAAACCA[G/A]TTGTAAGTCATTTGAGAGTGTTTGGCTCACTATGCTTCAAGCATGTACCTGATGAGAAAA	Y	A	0.868	0.868	Y		0.438	0.378	0.470899	0.351	0.471
BARC_1.01_Gm01_5247920_T_C	Gm01	5247920	T	C	CTTGGGCTTCATTTTTAGGCCCAAATTAAATCTGAACTTTTTTTACTTAACTCATTATAA[T/C]CCACAACTTACATTGGATCGGGTAGTCCATTATATCACCTATAACAAATAGGGATAAAAA	Y	C	0.965	0.74305	Y		0.426	0.385	0.478723	0.284	0.443
BARC_1.01_Gm01_5252053_C_A	Gm01	5252053	C	A	TCAACTCTCAACCGTTTTATTAATCATTGCATAGAAACTGAAAAAGAAAGAACGTAGTGA[C/A]TGATTGAAATTTTAGCTGCAAAGAAATTCTAAGAGACGAGAGGGTTCCAAATTCATTTAA	Y	A	0.965	0.965	Y		0.311	0.344	0.324468	0.188	0.283
BARC_1.01_Gm01_5273370_C_T	Gm01	5273370	C	T	GATAGTCGATCGAGCCAGTCTATCCCATATTCTTATATAGATTTAAAATATTGGTCCGTC[C/T]TCATCCTGCGGATCTCGTCGGTTAAACAAGCTAGTTTGCAGGCCTATTTTTTTTAATGCA	Y	A	0.95	0.95	Y		0.115	0	0.0572917	0.074	0.062
BARC_1.01_Gm01_5300057_T_C	Gm01	5300057	T	C	TCTTTCAATTTGATAGATTTTATTACCACACATTGTTTGATAATTCTATTTTTTTTCTTT[T/C]TGAAAGCAATATATTCTCTCCCCACTTTAAAGTCATTTTCCGATATATGCACGACATTTA	Y	B	0.935	0.77605	Y		0.448	0.375	0.463158	0.021	0.366
BARC_1.01_Gm01_5325304_C_T	Gm01	5325304	C	T	CGAGGCCAGCATAGATTTTCGGTGACATGTCAGGTGGCGTGTCGGCGCTGAAAGTTTCAA[C/T]GCCGACAGGAAGACCGACTTGTTCGGCCGGAAATTTCATGACATGCGTCCTGATGTTTTG	Y	B	0.996	0.82668	Y	CDS	0	0		0.114	0.038
BARC_1.01_Gm01_5348933_T_C	Gm01	5348933	T	C	CAACCACACAAACCCCCTATCCCAACCAATCACAACCCGTTTCACCATGACAACCACGCC[T/C]GTCTTTTGACACGTGTGAGTGAACCATGATAGTATCCTACACCGTCAGGCACACGATCGC	N	B	0.996	0.82668	Unknown
BARC_1.01_Gm01_5388549_A_G	Gm01	5388549	A	G	GTATCGAGTAACCGCTCAGGGGGACACATTAGTGACGCAAACTAACTACTTAGATGTTGT[A/G]GGGAGCCAAGTATCCTCATGATTCAAGTATGGGCCTAGTTTCTTGGGTCATATGGCACAT	N	A	1	1	Unknown
BARC_1.01_Gm01_5420897_C_T	Gm01	5420897	C	T	GACCGTCTTCGTTCATTGACTAAATAAAAAGGCCCTAGAGCTCACGTGCGCTATCCTTCT[C/T]CCCGAAAAGCACCTATTTTCTCTTGCCCTCTGTCGTGGCTCTTTTCCTCTGTTGTCCCTC	Y	A	1	1	Y		0.297	0.328	0.310526	0.154	0.261
BARC_1.01_Gm01_5453015_T_G	Gm01	5453015	T	G	TATGTTTGGTGGCAGGCTTCTGATTTCCCGGAGCTCCTTGCATTCATTCAAATAAAGTTC[T/G]GTCAAGGAGAGACAGGCACTGATTGATGATGGAAGGACTGTGATATTGCTGGAATTAAGG	Y	B	1	0.83	Y	CDS	0.474	0.354	0.439153	0.226	0.451
BARC_1.01_Gm01_5518672_T_G	Gm01	5518672	T	G	ATAATACGTGACAAGGGCACCCATGGTGTAGCTACAGGCTTTGCGAATGGCGGAGTCAGT[T/G]TCCTTGAGGCGGCGGACGACGTAGGCGATGATCTTGGTGAGATGGGTCGCCACAACATCA	Y	B	0.877	0.72791	Y		0.255	0.036	0.138298	0.212	0.361
BARC_1.01_Gm01_5555585_C_T	Gm01	5555585	C	T	TAAACATACATGAGTTAACACTTTGAATTACTTTGCAACACATTGGCCGCATTGCACCTC[C/T]AACATCACAGCTTCGACATCATGACTCCATCATTGTGCCTCGTTTAAATCTTCAGATCTT	Y	A	1	1	Y		0.443	0.374	0.465608	0.344	0.472
BARC_1.01_Gm01_5598125_T_C	Gm01	5598125	T	C	TGAACGTCTAGCCAACCGCATCGTGGGCCTCACCCCGCCACCGCCAGCGTTGCTGAGCTG[T/C]TTTGTTTCAGGATTATACCCAGAGTTGCGACGGGAAGTACAGGCACTTCAGCCACTATCC	Y	A	1	1	Y		0.276	0.344	0.306878	0.118	0.254
BARC_1.01_Gm01_5633908_A_G	Gm01	5633908	A	G	CTTTAATTATTCATGCAGTTGGATATGCCACATATAGAGTGAAGTGTTGAAATCATGATG[A/G]TTGGCTTTGCACCATGACCATGCCATATATTTCACTACATCAAATACTGCCTTAGTGTCA	Y	A	1	1	Y		0.281	0.344	0.308511	0.4	0.345
BARC_1.01_Gm01_5716473_G_A	Gm01	5716473	G	A	GCCTGCAGCCATGAAGATAATAAATTCTCTTACGCGGTAAGAAATTAATAATATTCCCAT[G/A]TGCACTATATAGTAAGAGAGAGAGGGAACAATGAGCAACATAAAGTGATGGGATATGGCA	Y	A	0.889	0.889	Y		0.396	0.363	0.37766	0.021	0.422
BARC_1.01_Gm01_5751947_A_G	Gm01	5751947	A	G	CTACTCTGTACTTTCACATAACACCCTCATTTATCAAGCAAAGGTCGTATTTAAGTAATT[A/G]AAACCTGATTAACAAGGAAGTATTATAATCATATATCTGGCCTCTGTTTTCTCCCCTGTT	N	C	0.899	0.69223	Unknown	Intron
BARC_1.01_Gm01_5777303_T_C	Gm01	5777303	T	C	TGTATTACTTTTAATTTGTTGCCCATCTTTTAAATGCAGAAAAAGTATAGGTGGAACCCG[T/C]AACAGGAGAACGCGATCAAATCTATTTTTGAGAAGAGAGGTTCAAGACTTTTGAAAAATT	Y	B	0.889	0.73787	Y		0.374	0.354	0.361702	0.403	0.449
BARC_1.01_Gm01_5809045_T_G	Gm01	5809045	T	G	ATTGATAACTCAGCTATTCATATATTATTAAAACAAATATTGAGAGAAAACCCTATTTTA[T/G]TTTACTGCTCTCATTCTGACCTATAAAACCCAATCGCAGACGTTTTTATTAATTTCTGTC	N	A	0.868	0.868	Unknown
BARC_1.01_Gm01_5855272_C_A	Gm01	5855272	C	A	CGGTCACACCAATGTTACATCATTATCATGTATCATCACACCACATTCTCCCCATTTTCC[C/A]TTTTCTCTCTTTCTGATTTGGCATTGGCTTAACAATTTTAGACATTTGGATTGTGATCAT	N	B	0.868	0.72044	Unknown
BARC_1.01_Gm01_5888484_T_C	Gm01	5888484	T	C	GGGTGTTATAGTTTATTTCTATATATGTATAGTTTTATTTTTGGCAAACTTACCATTGCG[T/C]GTGACAAATGTCGAACTAGAGTACAGAGGAACAAATGTCTTTTTAGGTGAATCTTTCTCT	Y	A	0.988	0.988	Y		0.333	0.358	0.340541	0.282	0.483
BARC_1.01_Gm01_5936538_C_T	Gm01	5936538	C	T	AGCTCCTCCTTACAACATTGCTCCATCTCCGCAATGCAGTTTTGGAGTTGCTGAAGAGTA[C/T]TTGTGTCTGTCATAGCTGGAGGATAGTAGCTTTCAAAAGGGGTCTTGTGTATGAGGCCAG	Y	A	1	1	Y		0.447	0.37	0.406417	0.255	0.483
BARC_1.01_Gm01_5974033_G_A	Gm01	5974033	G	A	TCAGGACAATGATAGTTGCCCTATAAGATTGCCAAATTTATTCAAGGCATTTTTCTCCCA[G/A]TAGATGCTCTAAGCAAAAGGTAAATGGCCTTTTCATGTTTGTTACATTAAACAAGGTAAC	Y	D	0.868	0.58156	Y		0.384	0.371	0.375	0.321	0.484
BARC_1.01_Gm01_6016611_G_A	Gm01	6016611	G	A	TGCTTGTGGGGTGCTGGTGACTCCATGCACTAGTAGTGCTGCTGTTGAAGTGGCTAGAAA[G/A]GTTGAAATCAGCTTCCTTCTGTTGGGGGAATGGTTATGGGGTAATGGGGTGGTGGTGGTG	N	B	0.947	0.78601	Unknown	CDS
BARC_1.01_Gm01_6038998_C_T	Gm01	6038998	C	T	AATTTTATATATGATATTAGGAAGGTTTAAAAACCTTTGGGGGACCATGGCCCCTATAGG[C/T]CCCCCTTCCTCCACCTCTGAGTATATCATATGTTTTATTTTTATGAATTCCATTGTGTCT	Y	B	0.965	0.80095	Y	Intron	0.38	0.372	0.372973	0.16	0.474
BARC_1.01_Gm01_6066148_A_G	Gm01	6066148	A	G	TGCTTTAATGTTGTTTTTTCGCAACAACTTTCACTTACTCAACTCCCTTAAACCTCCTTC[A/G]CTAATATGGCTAAGCCTTTTGTGCCAAAGGCTAGCTTGGGATTGATTTTCTTCAGAAACT	N	C	1	0.77	Unknown
BARC_1.01_Gm01_6092512_T_C	Gm01	6092512	T	C	TCAAGCATATACATCGTACTCTTTGACCACATACTATACCACTCCAAGGACACCAAGGCT[T/C]TATCAATAAGGTTCTTAGCACTACCATTGGGCCTAAACCAAGTGAAGCTTCTACTGACTA	Y	A	1	1	Y		0.384	0.365	0.370968	0.031	0.431
BARC_1.01_Gm01_6136784_A_G	Gm01	6136784	A	G	AGTGATCAATATATATTAACATCGAGAGCACTGGCTCCATCACTGATAGTGTACTTGGCC[A/G]ATTCACGGCGCACGACCTCATTTTCTCTTCTATTTTGTCCAAAGAAGCTGTAAGCTAAAC	Y	A	1	1	Y		0.385	0.368	0.372973	0.021	0.427
BARC_1.01_Gm01_6179933_G_A	Gm01	6179933	G	A	CCGGCGAAAAGGGATAAACATGGATATCGTTTTGGCTTCGCAAAACTCATTGATGTACAT[G/A]ACGTTCACATCCTGTGCCTTACTCGTAACAAGTTGTTCTTCGGGGAGAAAAGGTTGATGG	Y	A	1	1	Y		0.332	0.368	0.345946	0.146	0.286
BARC_1.01_Gm01_6227621_G_A	Gm01	6227621	G	A	AGATACCCAAGTGGTTATCCGTATAAACACTCTTTCGCTATCCGTCAGACTCAGAGTCCG[G/A]AAGCATGTAGAGACTAAATTCGTCTTCTGCACCCTTTGTCTATCAAGGGCAAGCAAACTC	Y	B	0.436	0.36188	Y		0.342	0.384	0.361702	0.155	0.296
BARC_1.01_Gm01_6271150_C_T	Gm01	6271150	C	T	TGCATGTCAAGCAAATATCTTGGTCCTAGTTTACATGCAGGGGTCCTATTTCAAGTGGTC[C/T]ACCTTTTGTTAATTGCTCTCGTAACCCACAAGCATGTTTAGGGATGTTAGAATAGCTTCT	Y	A	0.9	0.9	Y		0.384	0.365	0.370968	0.031	0.431
BARC_1.01_Gm01_6298893_C_T	Gm01	6298893	C	T	ACCTAAGGAGTGTTGAGGTCAAGACTGTGTGGTGGTCAGTGTGGGTGGCGATGATAAGGG[C/T]TATATGGCAGCTAATCAATGATAAGTCCAAAACCCCACACGAGTTTGATGATTGCATATG	Y	B	1	0.83	Y		0.297	0.347	0.304598	0.468	0.43
BARC_1.01_Gm01_6336241_T_G	Gm01	6336241	T	G	TCAGAGCACCACTGCATCATTTGAGCACCATTGAGGCTGTGTGCACCCCACCCATGTCCA[T/G]ATTTGTTGTGCACACCTCACCCATGTTTAGACCTGCAACACACATCCCACACGAACATAA	N	B	0.996	0.82668	Unknown
BARC_1.01_Gm01_6376529_G_A	Gm01	6376529	G	A	AATAAACGGAGCAGCAACAGATGGTGGTAGGGTTGCACCTATAAGTCCAACCTGCTTCGC[G/A]AGTGGCCTCCAGGTGAAGTCACCCATAGTACCTGCAAAACAACCAAGACAATAACACAAA	Y	A	0.915	0.915	Y		0.328	0.363	0.338798	0.345	0.353
BARC_1.01_Gm01_6415043_G_T	Gm01	6415043	G	T	AGTCCACCACTTTTCAATTGTGTGTGTGTGTGTGTGTGAAAAGGTTTGGACTGTACCTTT[G/T]TTTACAAGGTCTATCTTTCTTTCAAGGGCTGGAAATTCTTCCTTGAGAGAAAACATGATG	Y	A	0.988	0.988	Y		0.328	0.368	0.342391	0.435	0.382
BARC_1.01_Gm01_6458922_C_A	Gm01	6458922	C	A	ATAGCCCGTCTTAGTTCTCCGCCTATATCGGTGGCTCTCTCCGCCTATATTGGTGGCTCG[C/A]CTATATTGGCGGCATCTGTGGAGGGGGGATGTTAGGAAGTCCCACATCGCCTGCTTCAAT	N	B	0.771	0.63993	Unknown
BARC_1.01_Gm01_6498541_A_G	Gm01	6498541	A	G	TATGCGGAGGTAGTGACGTGGAATAATAGAAATCCAGGCTCAAAGAGAACACCTTGGAAG[A/G]AGAGTCAGAGAAGTGAAGCATCATGGTCCTCGATGTGTCTCAACATACAGAAAACAAGGA	Y	A	1	1	Y		0.38	0.368	0.369565	0.031	0.433
BARC_1.01_Gm01_6524953_C_T	Gm01	6524953	C	T	ATTGCGGTGGGAATCTTTGCTTTGAAAAAGCTTTCTCTAGCATCCACTTTGACGATGCCC[C/T]TACCAGTCCTCACGCTTCTCTTTAACGAGTACTGCCGAAAACGATTCCTGCCCATATTTG	Y	C	0.897	0.69069	Y	CDS	0	0		0.099	0.033
BARC_1.01_Gm01_6563678_A_G	Gm01	6563678	A	G	TTTTGCTCCTACGTATCCTCAATTGCGATGAGGAACTCAGGCCTACGCAGTTCATCAGGC[A/G]GTGTGAGACTAAAATAATCTCGGCGTTCTTTCACTAAAATGTGAACATGCTTTAGTAAAG	Y	A	0.431	0.431	N
BARC_1.01_Gm01_6600601_G_A	Gm01	6600601	G	A	AACTTATTTACATAAAGTTTGTCCTAGCCTAGCCTATTTCCACTTCTAGTTACAACATTG[G/A]TGAGAAAGACCAAGAAGGAATGTGGCTATTATAAGTATTATTGGGCAAGTTCACCTCCAC	Y	D	0.988	0.66196	Y		0.328	0.351	0.333333	0.226	0.308
BARC_1.01_Gm01_6623855_G_A	Gm01	6623855	G	A	TGTAAAAAGAATCTAGTGGGGCATCTGGCAGATCACGTTGTGGTCAATTTTGGAGTCACC[G/A]CAACAATATTGTTTTTAATGAGGCTCAGTTAGAAATACATAATGTGGTGGACTTGATCAA	Y	A	0.976	0.976	Y	Intron	0.328	0.33	0.322404	0.147	0.275
BARC_1.01_Gm01_6652562_A_G	Gm01	6652562	A	G	GTTCATGAAGTGGTTGAAGTATTTGTCCTTCATGTACTATGGCTTCAGGCTTCTTCTAAA[A/G]GTGCAATATTCAGGTGACCAATTATATGATTGTGAAAGCAAGGGAGGGTGCAAGACCCTG	Y	C	0.505	0.38885	Y		0	0.205	0.1	0	0.069
BARC_1.01_Gm01_6694936_T_G	Gm01	6694936	T	G	CTCATATGCAGCATAACGCTTAAGGGGGATCCAAGGGAATCCTCTATATGTACCCGAATT[T/G]CCTCAAAACCCTCCTCGATAGATACGGCCGCATGTATGTTCTAACTTTGATGTAGACAGA	Y	A	1	1	Y		0.302	0.01	0.148936	0.122	0.4
BARC_1.01_Gm01_6725300_G_A	Gm01	6725300	G	A	GGATTGGCTACCTAGGGCCGAAGTGATAGCTCTAATCAGAAATAGGAAAGAAAGAAAGAC[G/A]AACGCGAAACTTTTCTTATTTGCAAAAATGTGAAGCCCGCATAAAAACCTTATACGTAGA	Y	B	1	0.83	Y		0.25	0.01	0.12234	0.489	0.249
BARC_1.01_Gm01_6754321_G_A	Gm01	6754321	G	A	AACCTAGCTTCCTCTGAAAAAACATACTAACCTAGCTAACGGTGGTACCCTTGACTACAA[G/A]CTTAAAAAAATATTATATACGAAACATACATAATCATTTTGGTTCCAAAAACCGTGTTAT	Y	A	1	1	Y		0.328	0.021	0.169312	0.302	0.359
BARC_1.01_Gm01_6835270_G_A	Gm01	6835270	G	A	TTTCTATAGCTACGTAATAGGCTCAACTAATTAGACACCAGGATGCTGAATTAGCAGTGA[G/A]AAACACAGTATCATATTCAAATGTGAATAAGCAGAGAGAATCCCTCATAACCCATGGTAA	Y	C	1	0.77	Y		0.316	0.016	0.155914	0.331	0.224
BARC_1.01_Gm01_6874507_T_C	Gm01	6874507	T	C	CTCTTTTCTACGTGGGCTGCATGCATTTTGCATGCAAAACGCAAGTTCGAATGGCGACTT[T/C]GCGGGCATTAGACACGTGGAAGCCCAACCCGCCAATGCTGCTGGCGACTTCACGTGGAAG	Y	C	0.541	0.41657	N
BARC_1.01_Gm01_6907127_T_G	Gm01	6907127	T	G	CACAATAGCAGTCACATCATCAACATGTCATCATCATAAAATTAAAAGTCATATGTTTCT[T/G]ATATCTCTCCGTTGTTGAGAGGCTTTGATGTATCTCTTCGTTGTTGAGAGGTGTTTTGGG	Y	B	1	0.83	Y		0.316	0.016	0.155914	0.355	0.33
BARC_1.01_Gm01_6940159_G_A	Gm01	6940159	G	A	AGAGGGCCTATGAGGATTTGGATCTAGGGTTTCTACAAACAGAACTTTAAGATCTACTTC[G/A]AAGTAAGAGATATTTGCTTGTTTTGGATTACGTATGGGATGACAAGCAAGAGAATCGGTA	N	A	0.965	0.965	Unknown	CDS
BARC_1.01_Gm01_6984873_T_C	Gm01	6984873	T	C	TGAAAGCAACCAAATATCTTGTTCTTTCTTTCATGGCTAGAGATATACTTGCCCTTCCAG[T/C]GTTTACTGTGTCATTTGAGTCCGTATTCAACACAGGAGGTCAATTACTTGATCCATTTCG	Y	A	0.842	0.842	Y		0.318	0.026	0.16129	0.331	0.23
BARC_1.01_Gm01_7023106_A_G	Gm01	7023106	A	G	TGCCTACATGCTATTTCATCCTTTTACGTACTGGGCCTGAACAAATGGATTGATCCAATG[A/G]ATTTTTTTTATATAAGATAATCTCTCGCCTACGAGATTAGCCAACCCATGTCCCATTTAT	N	A	1	1	Unknown
BARC_1.01_Gm01_7052156_A_G	Gm01	7052156	A	G	TTCTAGTTTTTGCGATGGAGTTGTGGGGAAGCCCTAGGTTGTTGTGCGGCATTGCGATTC[A/G]GCTGTCACATGTTTGATCTATGGTGGGGTACCTTACGAAACAACATCGTGCAATTTAGCT	Y	B	0.9	0.747	Y		0.432	0.047	0.231183	0.021	0.491
BARC_1.01_Gm01_7078401_G_A	Gm01	7078401	G	A	TAAAATTTTTAGATGTGAATTTATAGAGGTAAGCAGGGCAGGCTTTCGAATTAATGGAAC[G/A]CATGATGTTCTCAGGCATGGGGATTTCTCTTGTAAATTTCTTCAACCCGTATTTGGGTAT	Y	A	0.9	0.9	Y	3UTR	0.224	0.01	0.111111	0.149	0.13
BARC_1.01_Gm01_7120392_G_A	Gm01	7120392	G	A	AGCCCCACGAATTGATTACTTAGCGCTGTTCGTGCATTCTCCACCATCAAATCTTATACG[G/A]AGGCCTATGAATTGATTTTCATTTATGCATCCTCCACCATCGAGTCCGGAGCCCCACGAA	Y	C	0.436	0.33572	N
BARC_1.01_Gm01_7148177_A_G	Gm01	7148177	A	G	TTGGCTTCTCCCTTCTTCTCTGTTCAACACTCAGATGGAAAAAGCCAGGGAGATAAGGGA[A/G]AGCAGAAACAGAAGGCTGATATTGCTTCACTTTATGTATTCTATTGTTTGACTTTTTTAC	Y	A	0.9	0.9	Y	5UTR	0.463	0.266	0.362162	0.261	0.496
BARC_1.01_Gm01_7224118_G_A	Gm01	7224118	G	A	CCTTTACACAGCGAGTTCGACGCCACCGCAGTGTTGGAATTGTGACACCGATGTCAATCT[G/A]GAGAAATCAAGTCGCGGAGTAGTCCCTTTGTGTACGCTTATCTTAAATTATCACATCCAA	Y	A	1	1	Y		0.453	0.281	0.362162	0.187	0.491
BARC_1.01_Gm01_7292162_T_C	Gm01	7292162	T	C	GGTCAGATTTGGGTAATGATGATGTCCTCAAAGCAATTTATCGAGTGGAATTTTCTGAAT[T/C]CAAGTACATCACTTCCTTGGCTATTGTTAGATTTTCCAATAGTTAGCGATCTATTGTGAA	Y	A	0.965	0.965	Y		0.237	0.01	0.121053	0.256	0.323
BARC_1.01_Gm01_7324910_C_T	Gm01	7324910	C	T	GTCAAACTCTTTCATCTTCTTTAGACTCAAAGCTTAGGGGGACTTGTGTACCGTACGAGA[C/T]CCACTAGTAATCAACACTAGTTAACCGACTACCATGACTTACACGTCATCCTTAGTGGAC	N	A	1	1	Unknown
BARC_1.01_Gm01_7346410_G_A	Gm01	7346410	G	A	GAAGGGCAACACTGTCATCACACCGTTGGATTTCCTCGAGGGGGAATCATTAGTCATGAA[G/A]CTGCCTTTGCCAGCCAGTTGGCTCCAACAATGTCACAGTTCTATTATCCAATTCAATTAC	Y	B	0.897	0.74451	Y	CDS	0.208	0.01	0.105263	0.115	0.113
BARC_1.01_Gm01_7368962_G_A	Gm01	7368962	G	A	TCGGCACTAGAACGTCTGCGCTATGCATGGAGGCTCTGTAGCATCAGCACTAGAACGTCT[G/A]CGCTATGCATGGAGGTGCTGGAACTAATGTTGGAGCAGGAATGGGAGTTGGAGCTGGTGG	Y	B	0.949	0.78767	Y		0.219	0.01	0.110526	0.095	0.11
BARC_1.01_Gm01_7390712_A_G	Gm01	7390712	A	G	ACTGATCTCAACAAAGTTGAGGCCGAGATCCTCAAAACTCATGAAGTTGGCTTCTTTAAG[A/G]CTACTCGGCAAGCAAAATACTTCTTACAGGAAGTCAACCTTTCCCTCTCCAATATTGACA	N	B	1	0.83	Unknown
BARC_1.01_Gm01_7411422_T_C	Gm01	7411422	T	C	GGTCGTCTCTATCACCACCACTATAGATCTTAAAGAAGGGGATGTAGAAGAGGCGACATT[T/C]AGGGGTGTTCACCACAAACTTACAGAAGGCCTCATGGGTTTTGGAGCTGCCAAGGAGGGA	Y	A	0.949	0.949	Y		0.229	0.01	0.115789	0.477	0.24
BARC_1.01_Gm01_7449176_G_T	Gm01	7449176	G	T	GTAGACAACGACGACGCCAGACTTCAAAGTCGGAATAGTACCACCACGATGAGGGGTGGC[G/T]CGTAAAACCCGTACCACGATCGGTCAGTGATGGAGACAGTAAGGTCACTGAAGGCACACT	Y	B	0.949	0.78767	Y		0.219	0.01	0.110526	0.125	0.12
BARC_1.01_Gm01_7476077_C_T	Gm01	7476077	C	T	TGCTGGGTGCACGTAGCAACTCCCCAAAACTGGTAATGGAATTTTGGACCATCACAAAGA[C/T]GTGTGTATTCGAGTGTAATGATCAAATAATTGTAGAATTCTGCCTTCATTCAAGGAAGAG	Y	B	0.9	0.747	Y		0.219	0.01	0.110526	0.105	0.113
BARC_1.01_Gm01_7507993_A_G	Gm01	7507993	A	G	GGGTCTTGTGTGTTGAGCTTGATATGGTCATGCTTAGCTTGGGACCACTGGAACAAGATA[A/G]GGCTAGTTTGTTTAAACTTATATGTTAAAAAAACACTTATTGTAATAAAATAAGCAATAA	Y	B	1	0.83	Y		0.5	0.021	0.255319	0.082	0.483
BARC_1.01_Gm01_7544242_A_G	Gm01	7544242	A	G	CCCTTTCTTTGGGATTCTAATCTTCCACAACCATTTAAAAAGAACATGGGGAATAGAAGG[A/G]GGGAGATGGTTCCCTTGGGTGACCAACCATTTATAAGCAGATGAGGGATAATATTTCCCA	Y	B	0.988	0.82004	Y		0.229	0.01	0.115789	0.395	0.213
BARC_1.01_Gm01_7599113_T_C	Gm01	7599113	T	C	ATATTGGAATCAATTTTTTGTATCTGTGATTTAAAATGATAATTTTGGCTTCATAAATGG[T/C]TGAAAACCATTGAGTTTCCATTTGGATCCTCAGGTTGCAACCGCATCAAAGTGACACAAC	Y	B	1	0.83	Y		0.484	0.021	0.245989	0.104	0.469
BARC_1.01_Gm01_7629800_A_G	Gm01	7629800	A	G	GGTAGACAAGTTAGTGGTGATAAGGAAGAAGCCCCTCAGCGTCAAAGGCCGATAGCATCG[A/G]CACGTAGATAATGGGTAGTTGTAGTTGTTGTCGAGGATATTGACCATATGGATCATGCTG	Y	A	0.8	0.8	Y		0.479	0.021	0.244681	0.079	0.479
BARC_1.01_Gm01_7659177_T_C	Gm01	7659177	T	C	TATGAAGACTGTTTAGCACTCTTCATTCTTGCAAAAATCAAAATCACAAAGTATTTGAAG[T/C]CCAGTGTATGAGCCTGAGGGACTTCTGTACATATCCTTGGACAGACATGAGATGCATAGA	Y	D	0.897	0.60099	Y	Intron	0.255	0.042	0.142857	0.06	0.417
BARC_1.01_Gm01_7683057_G_T	Gm01	7683057	G	T	GTTTGACGTAGAGCAATGACACCCACAGGAGCAAGAAATGGCCTTACCATGACAATCACA[G/T]CAACAACCACCACCACTGTTCGCATTTGACATACAGACACTTTTGGGGCGGTTGGATGGC	Y	A	0.996	0.996	Y		0.247	0.042	0.138298	0.458	0.251
BARC_1.01_Gm01_7729726_C_T	Gm01	7729726	C	T	GTGGTGTGGTGAGATTGTTGGACGTGATTACCCAAGATGGAATTAGATGTGTGCATGACA[C/T]CAAATTGTGTTCTGGAATTGTAATGACCGTCTTAAGATAAAAGCTTTTTTTTTACCTCAA	Y	B	1	0.83	N
BARC_1.01_Gm01_7775299_G_A	Gm01	7775299	G	A	TTTAGGTGTCCTATTAGTGAAGAAGGTGTCAGGTAAAGGCTTGGTTTCTTGTTAGCAAAA[G/A]AGGTGTCACTCTGATGGTCTCCACCCTTGCTTCTTGTTTACAAAGGAGGTGCCTCCCTAG	Y	B	0.996	0.82668	Y		0.229	0.021	0.121053	0.052	0.102
BARC_1.01_Gm01_7817320_A_G	Gm01	7817320	A	G	TCGGCGTCATCCTTCATGTTGGTTGAAGTTGATGGTAATCAACATCATCTTGCATCCAAC[A/G]TGATCGCCTCTCTGCCAAACCCTCCCCTTCCTCCCTGATCTGCATCGGCCTCTGAACAAA	Y	B	0.9	0.747	Y		0.255	0.042	0.142857	0.018	0.431
BARC_1.01_Gm01_7856395_A_C	Gm01	7856395	A	C	AGTGGGTTAAATAAATCACCCCATTCTATAGTTGGTTTGGTTCGACCCGACCCGTTTCGA[A/C]AAAAAAAAAAGTAGGGACCTGAATATTCAGTGACCCATTTCGCCCCGCACTGCGTACTCT	Y	B	0.9	0.747	Y		0.253	0.042	0.142857	0.363	0.311
BARC_1.01_Gm01_7912184_T_C	Gm01	7912184	T	C	CAAGACCAAGTCCGCGCCACATAGAGGTAAATGAAATAAATCCAATGTAAAGGTGTGGTC[T/C]TGGATCGAAACGGGTACCTGAAGGGACTGAGTGTCGCATTCTAGAGTATTCCTGTTACCC	Y	A	1	1	Y		0.258	0.042	0.143617	0.334	0.325
BARC_1.01_Gm01_7948420_C_T	Gm01	7948420	C	T	TACACTTGCTGATTAGTATCGCAAATGGGAGAGTGCAGAATAGGCTACCATACACAACTG[C/T]TATACACCATGGCTCACTCTTAATGAATTGGCCTTTAAGTGCATGGTTTGGTAAGTCATC	Y	A	1	1	Y		0.229	0.021	0.121053	0.237	0.164
BARC_1.01_Gm01_7992623_C_T	Gm01	7992623	C	T	GACGTTAAGCGTTTCATTCGGGAATGCAGTGTTTGCCAACAGACGAAGACAAGTACTCGT[C/T]GTCCGGCTGGTCTTCTTCAACCCTTGTCGATTCCCACCAGAGTATGGGAAGATATCTCTA	Y	A	0.915	0.915	Y		0.229	0.021	0.121053	0.362	0.299
BARC_1.01_Gm01_8029354_G_A	Gm01	8029354	G	A	CTCGTCGTCGCCGTAGAAGCAGAGGCAGAGGAAGACGCAGCGCACAGAGAGCTCGAAGGC[G/A]GCACCATCGAAGAAGAGGTTCTGCTAGCGGTGGGTGATGATGTGAAAGGGTGAGAGTAGA	Y	C	0.663	0.51051	Y		0	0		0.225	0.072
BARC_1.01_Gm01_8077527_T_C	Gm01	8077527	T	C	ATTAAAAAATATTCTCATCATACTAGTTTAAACAATAATATAACTACAGACATATAAAAA[T/C]TGGTGCTATTGCGGCTACACCTCCCGATTTGTCAGGTATATTATGAAGAATGGCATGGAT	Y	B	0.8	0.664	N
BARC_1.01_Gm01_8099855_T_C	Gm01	8099855	T	C	ACACAAAATGCACGAAGCAAAATCCCTAAACCAGAGTGTGACTTGGGCCGTATCGCGGAG[T/C]AGTGAGCACAAAACGATGCCGTATCGCAAAGCAGTGAGCACAAAACGACGCCGTATCGTG	Y	B	0.878	0.72874	Y		0.255	0.042	0.142857	0.018	0.431
BARC_1.01_Gm01_8151316_A_G	Gm01	8151316	A	G	GTGAATTTTGGCTTAGCGGGATAGGGCACGCTGAGCGTGAAAAAAGACAACGTCTTCACT[A/G]GGCGGGCTGGCTGCGCGCTGGGCGAGCACATCTCTGGCTTATCCTCTTCTAGTGTTTCCT	Y	C	0.664	0.51128	Y		0.229	0.021	0.121053	0.124	0.377
BARC_1.01_Gm01_8186618_T_C	Gm01	8186618	T	C	CAAAATTTTGTACAAATCTCCTATAATAACCAACCTACCCTAAAAATCCTCTAAGCTATT[T/C]TATATTGGTGGGAAGTGGTCAATCTGCAATTGCCTGGACCTTAGAAGGGTCAGTGGACAC	N	C	1	0.77	Unknown
BARC_1.01_Gm01_8237173_A_G	Gm01	8237173	A	G	TGTTGCAACCTTCTGTATCTATTACGCTGCCACAACCCCTTCGTTCATCTTCACCCTTCT[A/G]TGGATCATCTTGTTGGTGGTGTCACCTCCCGTTGTCGTTGTTGTCGTTTTCATGAGTACC	Y	B	1	0.83	Y		0.229	0.021	0.121053	0.137	0.371
BARC_1.01_Gm01_8279078_C_T	Gm01	8279078	C	T	CGTGAGCCCTCGCGTTGCCCTCGCGCCGAATGGTAGGTTGCGACATCTCCAAATTGACTG[C/T]TACCAAAATTGATTCTCAGGCCAAAAACCATCTCATAACTTCTAAGAATAGCCTTGACAG	N	A	0.472	0.472	Unknown
BARC_1.01_Gm01_8306450_T_C	Gm01	8306450	T	C	CTGATATGCTAAATGTTTGGTCCCTCTGTCACGATACCCAGCTAGTTTCTTATCTCCACC[T/C]CTTTTTCATTTGGGCATGGCCCATTAGTTCCACCCTGAAACCCAACACCCCTTATTACTC	N	A	1	1	Unknown
BARC_1.01_Gm01_8338593_T_C	Gm01	8338593	T	C	GTCAGTCAACTTGGATGACGTGATGGCACACAAGCTGACTCGCGAGAGTAGCCGTTGAAA[T/C]GTTACCTGTCTGATTGATAGCCATTGAGCTAATTACACACGAGGTAATGTCTTTACCCTT	Y	B	1	0.83	Y		0.229	0.021	0.121053	0.219	0.352
BARC_1.01_Gm01_8383833_A_G	Gm01	8383833	A	G	CTCACCTGTCAAATCATCATCATCATCATCATCATCTTCACCACCACTGCCACCACCTTT[A/G]TTGCTTTCAATATCCAACTATTTGGGCTAGGCCAGAGCACTCTCAAGCCCATTCACAGAC	Y	A	0.996	0.996	Y		0.229	0.021	0.121053	0.042	0.402
BARC_1.01_Gm01_8418231_C_T	Gm01	8418231	C	T	CGCATCGGCATCGTGGTGGTCTTCATCATCGCTAGCCCTTTCTCGTGACTCTGTCTGACT[C/T]GCGTCGTGTTAGACTGTTGGTCCACGCCATCGTAGAACACTCGTCGAAAGCCCTCATTTT	N	B	0.949	0.78767	Unknown
BARC_1.01_Gm01_8484147_T_C	Gm01	8484147	T	C	ACAAATCATCCACAATCCTCTTCCATTGCAACTCAGCCACATCCCCACCATCCCCATCAT[T/C]CAAAGACCCTATAATCTGATGGGGAAGCAGAGCACCAGCAGCAATGGTACTCTTCCCTGA	Y	A	0.976	0.976	Y	CDS	0.219	0.432	0.324607	0	0.219
BARC_1.01_Gm01_8539700_A_G	Gm01	8539700	A	G	TTGTTTCTCCTTTGTGAAAGGAACACCTCCAAACCTTCCATAAATTGCACAAAGTCGTTG[A/G]CGGTGGTGGCGACAAAAGCAGCAATGACAAAAATGACGATCATTGGCGACGATTGATTGC	Y	C	1	0.77	Y		0.245	0.031	0.132275	0.25	0.345
BARC_1.01_Gm01_8569887_A_G	Gm01	8569887	A	G	ATAAATAGCATTATCCTTTCAATATTTTTTGCTTCTAAATTCTTAATTAGTTATTCAAAT[A/G]TTAATACAATACCCCAACTTTTTTTGGACTGATTATTAGTCTTGTAAAACTTTGTCACTA	N	A	0.813	0.813	Unknown
BARC_1.01_Gm01_8601858_C_T	Gm01	8601858	C	T	ACCATCATGACCACCATCTCTCCACCGCAAGCAACCACACCCTGCTCGATACCTTTGCCT[C/T]TCTCATTCATGGAGCTTTAGAGACTCCAAGATCAGAGCCTCTCCTCGCGAAAAGGAAAAA	Y	B	0.976	0.81008	Y		0.219	0.021	0.115789	0.032	0.093
BARC_1.01_Gm01_8641430_C_T	Gm01	8641430	C	T	CAGCACATTTAACTCAGATGGATTAAATTTTCCCATTCACCTTGAAGCAACTCCTTGAGG[C/T]CGACTTTTTCTGTTTCTTTTTTATTAATATGATTTCTCAAAGTACAACACTAAACCAAAC	Y	A	1	1	Y		0.234	0.021	0.121693	0.263	0.339
BARC_1.01_Gm01_8674202_A_C	Gm01	8674202	A	C	TGACAATGGCGAGTTTGCTGTGCGAAAGCCACGTGGCCTGGAAACCGTCAGTGGTGATGG[A/C]GATTTGGTAGCAGGTGCAAGTTGCCAGTTCCTCTAGCGAGTCTGGTCACAGGTAAGTAAA	Y	B	0.759	0.62997	Y		0.464	0.042	0.251309	0.076	0.483
BARC_1.01_Gm01_8721909_C_T	Gm01	8721909	C	T	CTCCGCATATGGGATATCTTATTGCATGGTGAGCTTGACAGGTCTCCCAAAGTGGGAAAG[C/T]TATAATAACCGTTAGGATGTGTGTTGCTTTGAATCGTGCGGTTTTTTTTTTTTTTTTTTT	Y	D	0.996	0.66732	Y		0.463	0.042	0.248677	0.426	0.31
BARC_1.01_Gm01_8750499_A_C	Gm01	8750499	A	C	TAGCACATTGTGGGGTTGGTATTTTGGACAGGAATGAAGCAAGATATTCAGAAGTACATG[A/C]CTAGTTGCAAGGTGTGTTAACATAATAAATATGCATCACTTGCCCCTGTTGGTAATTCCA	Y	A	1	1	Y		0.474	0.042	0.253968	0.221	0.432
BARC_1.01_Gm01_8793306_T_C	Gm01	8793306	T	C	TTGCAATCTTAGAATTTTTATTCAAGTCAGAAGCCATGGTGTCTCGCATACTGTATTATC[T/C]TAATCATAATTGGGCATGATTACATAAATTGTGAAATACTAATATTCTAATTAAATGGGA	Y	D	0.965	0.64655	Y		0.473	0.042	0.251337	0.223	0.431
BARC_1.01_Gm01_8822487_T_C	Gm01	8822487	T	C	CCCCTTTCTTGGAGGAGGAGATTAAGAATGTCGTTGGGGATTATGGGAGTGATAAGAGCC[T/C]GGTGCTAGATGGTTATAACTTCAATTTCATCAAGAACTTTTGGGACATGTTGAAAGAGGA	Y	A	0.996	0.996	Y		0.474	0.042	0.253968	0.051	0.487
BARC_1.01_Gm01_8845965_T_C	Gm01	8845965	T	C	CTATGAACTCCCTTGTCTCCTACTAGATCCTTGTGGCTAAGACGACCTCCTCTCCTCCAT[T/C]GTTGGCACCAAAGACATATCATCGGACATCACTGACAGTGTCGCAAGATTTATTAGCGAC	Y	A	1	1	Y		0.161	0.021	0.0890052	0.371	0.274
BARC_1.01_Gm01_8891420_G_A	Gm01	8891420	G	A	CCACAGGTTTTTCTGCCCTTGGTGGTCTAGTGGCCAACGATCGTAGTCGTGTCGCCTTGC[G/A]TGTCCACTTCAACGTAGAAGAAGACACTGATGCGTCTGCAGGAGGAGGTGGAAGAGGAGG	Y	A	0.444	0.444	N
BARC_1.01_Gm01_8933345_C_T	Gm01	8933345	C	T	TATAGAAGAGGATTTGAGAAAATAAAAGAGTTCTTGGTTGGCTTGGAAACAGATCTTTGC[C/T]GAGTACGATCTCTTGCCCTCGAGACTAGAGTTGGAACTCGTCGTCATCATAGGGTAATGA	Y	B	0.976	0.81008	Y		0.198	0.021	0.105263	0.011	0.078
BARC_1.01_Gm01_8964201_T_C	Gm01	8964201	T	C	AATTGGCTGCCCCAATCGTTCTTGATCTTGATGAGCACACTGAGGCTCACACAAATTCCA[T/C]CACGTCGCCGCCGTTACTTGTGCTTCCACCACCAAGTCGTTGTCGCCCCGAGAAGAGGAT	Y	B	1	0.83	Y		0.198	0.021	0.105263	0.28	0.311
BARC_1.01_Gm01_9014216_T_G	Gm01	9014216	T	G	TAGTTAGCATTTGTCCTTCAGCATGTGCATGTCCTAGTTTTATACCTCTAATTATTATAA[T/G]TTGGTTTTTGGTTTATCAATTACTAGAAACTATGGTTCATGTGCCCATTTCATAAGGCTC	Y	A	0.899	0.899	Y		0.276	0.021	0.146597	0.367	0.308
BARC_1.01_Gm01_9040010_G_A	Gm01	9040010	G	A	CTAGCGGTGGTTGAAGTCTTTGTGCTAATTTTCTCATCATCTAGCTTTTCTTTGGATGGC[G/A]GCGCAATCACTGTTTGAGTGATGCCATCCTCTGTGTGCAGATGTTTTGCATCCTGAGGAC	Y	A	0.897	0.897	Y		0.237	0.021	0.126316	0.166	0.142
BARC_1.01_Gm01_9071246_T_C	Gm01	9071246	T	C	TCAATGGGTTGCAGAGCAAATCGCCAATATGAATGGCAGTTTGCGTTTTGACTGGAATCG[T/C]CAGCATGGCTGGCGGTTTGCTTGATTCAAATTTTTGGTCTCCTTCCATTATAAAAGAGGA	N	C	1	0.77	Unknown
BARC_1.01_Gm01_9116203_A_G	Gm01	9116203	A	G	GGAGATAATGAAAAAAAAGTTGAAGGAGGCGATCAAAACTGAGTTATCCCAAATGGCCTT[A/G]CAACACTTACCCCTTGTAGACGCGCTTGACCCTAACGTATTGGCTGCACGTGTTAACACA	N	A	0.771	0.771	Unknown
BARC_1.01_Gm01_9145300_T_C	Gm01	9145300	T	C	CCCTTGATTCAGATTAAAATTGGCACCTTGCTGGTAAACTGAAAATCCACTTGCATTGGT[T/C]TGTGCTGATTTCCCTTATAATTAACTTCTTTTGCATCATCATCAAGAGGTATACAACAAC	Y	C	0.611	0.47047	Y		0	0		0.151	0.05
BARC_1.01_Gm01_9170277_A_G	Gm01	9170277	A	G	TTCTGATCAATACTCGTCTTAGTACATAAACCATTCTAAGACGGGTGAGTAACCATCATA[A/G]TAACGTCGTCGACCAATTACGACGGCCGCTTCTACGACAGGTCAGAATCGTCTTAAAAAG	Y	A	0.915	0.915	Y		0.255	0.021	0.137566	0.402	0.299
BARC_1.01_Gm01_9207793_T_C	Gm01	9207793	T	C	GGGTGGCAATGTGGGCTTTGGCCCGATGAACCTACCTGCTAGCTCACCAAAAACGGTAGG[T/C]CGAGCTAGGTGACTTAACCCATCAGCCCACATTGGCTCGCTTTGCCTAACCTGCCATCCC	Y	A	0.824	0.824	Y		0.255	0.021	0.136126	0.255	0.345
BARC_1.01_Gm01_9235132_G_A	Gm01	9235132	G	A	GGTTGCATTGCGCAGGAAACTTGGAATAGTGCTTTTAGAGACGCGAGTTGTGTTGCGGAT[G/A]CTATGGGAAAACAGGCTTTAAGCATTAATATGGATTATCATGTATTTGAATTGGCTTCAG	Y	B	0.996	0.82668	Y		0.255	0.021	0.136126	0.387	0.221
BARC_1.01_Gm01_9264606_A_G	Gm01	9264606	A	G	GTACACATTCGAAGGTTATTGAATCTGAACCAATTAAACCAAAACCTGTTGGTGGAAAAT[A/G]AGAGGTAATGGGGCCCTCAGGAAAAAAAGATCATCAATCAACCAATGAAGGTTAAGCATG	Y	A	1	1	Y		0.258	0.021	0.136842	0.303	0.194
BARC_1.01_Gm01_9305696_A_C	Gm01	9305696	A	C	ATTTTCATACCGTGTAGGTAATAATTGTCATGCTTGAGACCTCATTCTTCGAAATTATAT[A/C]GACTAATTTCTATTGGGTGTACTTCACCAAAGAGTCTTGCTTATCTTATTGTTTCCTTTT	Y	D	0.787	0.52729	Y		0.255	0.021	0.136126	0.307	0.195
BARC_1.01_Gm01_9361366_T_C	Gm01	9361366	T	C	TATTTGAAGAAAAACAAAAGGCTCAGCTCAAGATGCGCTTAGCGTGGAAACAAGCACTGA[T/C]GCTAAGTGAGGAAGAGGCGCGCTAAGCGCGAATACTGACACCCACGCTAAGTGAGCAAAA	Y	B	1	0.83	Y		0.258	0.021	0.136842	0.058	0.41
BARC_1.01_Gm01_9415839_G_A	Gm01	9415839	G	A	TGTCAAAGGTACCTGGGCTTAGCGAGAAAGCACTCGCTTAGCTACAAGTATGTCATTAAT[G/A]ACGTGTACAATGGCTTAGCGCACACGGCGGTCGCTCAGCCATGATGTTAATAAGGAAGAT	Y	B	0.679	0.56357	Y		0.255	0.021	0.136126	0	0.139
BARC_1.01_Gm01_9440429_G_A	Gm01	9440429	G	A	CGCATGACCTGAGCAAGGAGAAGCCGAGTGTACATGGTGTGCTACAAGTACGGGCTCTCA[G/A]GTGGTGCTCCCCATTGCCGAGCGCGAGACCCTTCTCCCCAATCTCCATGCCAAGCCTGTT	Y	B	0.915	0.75945	Y		0	0		0.239	0.075
BARC_1.01_Gm01_9483101_T_C	Gm01	9483101	T	C	GTCCTACGTGGTGTCCGGGTTCTCCGCCATGCTCTCCGTCTTCTGCTACATAGAGTTTGC[T/C]GTCGAAATCCCTTTCGCTGGTAGTGTGTCTGTTAATTAAGTATCACATTATTCACGTTTT	Y	B	0.988	0.82004	Y		0.247	0.021	0.131579	0.245	0.346
BARC_1.01_Gm01_9507819_G_T	Gm01	9507819	G	T	GAGTACCAAGATGATCACTATCACCCACCTTTTTCTTCAACTGTGACACATGGAAGACAG[G/T]GTGTATTTGCGCCCCAGTTGGTAGCTTCAATTTATAGGCCACAACTCCTATGTTGTCAAT	N	A	0.9	0.9	Unknown
BARC_1.01_Gm01_9542693_A_G	Gm01	9542693	A	G	ACCATCCCCGCCCCTAGAAGAAGGTTAGTCTCTTGGTCAAGCCAAAAATGCATCAAAATT[A/G]GGGTTAGGCCTTAAAGAGGAAGCATTTAAGCTTTGAAGACCATGATGGATAGCTGTCAAC	N	A	1	1	Unknown
BARC_1.01_Gm01_9583068_A_G	Gm01	9583068	A	G	TTGGTAGCCCATCACTTAAAAATTTCATCTTTAAGTGTGTCTGGCTTGGAGCAATAATGG[A/G]ATGGGTGACCTTCTAGAAGTTTTCTGTAAAGCGTGTGATGAGAACAAAGCATACTGAAAA	N	C	1	0.77	Unknown
BARC_1.01_Gm01_9629853_T_C	Gm01	9629853	T	C	GGGCCAAGAGGATGTGTAGCATACACCTCGATAGTAGCTCTTAGGCAACTGAAATGGACA[T/C]AGGTCGTGCCAAATATTGAAGAGTTGGGAGGATTGAGTTTTCAATATGCTTTAGGTGATA	Y	A	1	1	Y		0.258	0.021	0.136842	0.234	0.353
BARC_1.01_Gm01_9658162_A_G	Gm01	9658162	A	G	CGTTCCTCCCACGCGATCCAGAAGGGGAAGAAGAACGTGTTTCTAATAAAAAGAATGTTA[A/G]GGTTTATAAGGATGTCAGAGAAGAAAGAGAGGTCAGTGCGAAGGAGGGAGGCAAGAAGGG	Y	A	0.996	0.996	Y		0.266	0.021	0.141361	0.208	0.361
BARC_1.01_Gm01_9686863_A_G	Gm01	9686863	A	G	CAACCCAGTCAGCATCACTGTAGGTTTGAAGTTGTATTGGGGCACCTCCAGGAAAGAATA[A/G]ACCACGACTAGAAGTGGCAAGCAAATATTGAATGATTCATTGTATTGTTGTAAGATGCAA	Y	A	0.668	0.668	Y		0.266	0.021	0.141361	0.218	0.357
BARC_1.01_Gm01_9714061_A_G	Gm01	9714061	A	G	AATGAGAACCATGTTAAGTTAAGGTTGGATCCAACTGTGGGTGGGGGATGACTTTTAAGT[A/G]CAAAGACATTGGTTTGAGTGGGAAAAAGAAAGGGTACAAGAATTTTGGGAAGATTCTGGC	Y	D	1	0.67	Y		0.073	0.234	0.148148	0	0.105
BARC_1.01_Gm01_9737470_T_C	Gm01	9737470	T	C	ATACATCCTATATCCACTTGTAGGATGATAGCCAACCAGGATCATAGGCTCACTCTTATC[T/C]TGTAACTTTCTTTTCCTTTGATTAGGTACATGACTGAAGCATAGTGATCCGAAAATCCTT	N	A	0.965	0.965	Unknown
BARC_1.01_Gm01_9772578_C_A	Gm01	9772578	C	A	TATTATCTAGCTAGTCATAACAAGCAAAGTCTAACCCCCATCCACAAAACACTTTTCTTC[C/A]ATGTTTGCTTGGTACGAAAGCAATAGCGACGGAGCTTTAAGCCACGTCAATATATGGATA	Y	A	1	1	Y		0.255	0.021	0.136126	0.115	0.388
BARC_1.01_Gm01_9807252_C_T	Gm01	9807252	C	T	TAAGCTAGTGTGTTCCCTTTAAACTACCAGGCTATAATGGTTTTTGATATCCAATGTACT[C/T]AACAAATTACTCAGTGATATTGAGTAATTGATTGTTTTTGATTCAGGAAAATCTAAGAAA	N	A	0.935	0.935	Unknown
BARC_1.01_Gm01_9843399_C_T	Gm01	9843399	C	T	CATTGAAGACACTGACTTCACCAACCTCATCACTGGCAAGAAGCAAAATGACATTGTCTT[C/T]TGCTTAGGCCCCAACCAAACCATCAAAGACCACTTTCTCGAAGCCACACTCTTTTGGCTC	Y	A	0.878	0.878	Y		0.234	0.021	0.125654	0.021	0.093
BARC_1.01_Gm01_9901272_C_T	Gm01	9901272	C	T	AAAGTCAAATATGATACCATAGGAGTATCTTTACTGGGAGATCTTGGAGTGGGTTTTTAA[C/T]CTTAAGAACCGATCTTTTAAAGATCCAGCACTAGAGAAACAACAAGGATCTCTACCATGT	Y	A	0.988	0.988	Y		0	0		0.027	0.009
BARC_1.01_Gm01_9928013_A_G	Gm01	9928013	A	G	CTTGAAGTCCTGAGCAGTCTAGAAACGATTGGTGTGGTACACATTCCTCCAAACTCAAGC[A/G]CAAAACGCAATGAGGTTTGAAGTCATGGTCCGACGACAAATGACCGATAAGTACATAGTC	Y	A	1	1	Y		0.245	0.021	0.13089	0.042	0.409
BARC_1.01_Gm01_9967172_G_A	Gm01	9967172	G	A	TAATGAATCAGTCACTCTCTCCCTTGCTTCCCTTTCCACTTGTAGGACCGATACTTTTAC[G/A]TGCTCGTCCTCTAGAATTTGCTCATGGCTAGCAACTAGACTTAGTTTCTCTTTATACTGG	Y	A	0.519	0.519	Y		0.245	0.021	0.13089	0.122	0.384
BARC_1.01_Gm01_10015701_G_A	Gm01	10015701	G	A	TTCACTTGAATGATTGCAGTAGCTAAAACAGGCTGAAGGGTAGAGATCTCCTACTAGATA[G/A]CCCTGACTTTGAAGTTCAACTAGTCGAGTACTTGTCCTAGCTTGTGGTTCTAGATTAGCT	Y	A	1	1	Y		0.234	0.021	0.125654	0.126	0.375
BARC_1.01_Gm01_10052330_C_T	Gm01	10052330	C	T	GACACTGGTTTGTTTCTTATATATGCGTGCAATTTGATTAATTAAATTCAATGTTTTACA[C/T]GTTATTGCCCTGTTGAGCATGACAAATGGGATATGATTTTATTATGATTTTTCAAATTTC	Y	A	0.809	0.809	Y		0.234	0.021	0.125654	0.117	0.385
BARC_1.01_Gm01_10074809_T_C	Gm01	10074809	T	C	TTCCTAGAGACCCAGGTGGTCTTGGAGACTGGGGAGCACTACATCACTTACTCCAGATTC[T/C]GTCATTCACATCCAGATACCCAGGAGCTGGCTTCCAGACTTTGCATTTCTGGGCGAGGAT	Y	B	0.897	0.74451	Y		0.234	0.021	0.125654	0.387	0.291
BARC_1.01_Gm01_10139517_G_A	Gm01	10139517	G	A	ACTCCAATGGAGGATGCTCCACTTCGAGGCAGTCACAAACCCCAATGACAATCGCGAACG[G/A]CAAAGATGGTAACGAGGAGATGGCGGTCACAGGTCACAAACAGCGGTCACAGGGTCTTAC	Y	B	0.625	0.51875	Y		0.229	0.021	0.125	0.157	0.384
BARC_1.01_Gm01_10178219_A_G	Gm01	10178219	A	G	GCAAGATGTGCAGAAAAAGGCACAGGCCATCTAGAAGCAAAACATTACCCTCCACGGGTT[A/G]TCTCCTGGGGGTTATGCATATTTAGAAAAGAAGTTGATGGATGAGAAGACAAAGAAAAAA	Y	B	0.436	0.36188	Y		0.229	0.026	0.125654	0.106	0.38
BARC_1.01_Gm01_10238435_G_T	Gm01	10238435	G	T	AAAGTCCTTGTTGGGGGAAACACATGTGGATTCGGGTTCCGCAAATAAAGATGCAGCAAA[G/T]AATACCACTAGAACTGGCAAAAGCTTAAGTCTTGCTTACATTGCAGAAAGGAGAGCCAAA	Y	B	0.832	0.69056	Y		0.234	0.021	0.125654	0.434	0.279
BARC_1.01_Gm01_10274656_T_C	Gm01	10274656	T	C	CTGCCATGTCATCACGCGCTCAGCACGTCATCAGCTCGTTCAAGGAGAAGATTGTCTTTT[T/C]TGTGCTTAGCGCGAGAATGACGTTTAGCCAAATTTCAATTACTCGGGCTAAGCGTGCCTT	Y	B	0.8	0.664	Y		0.234	0.021	0.125654	0.112	0.384
BARC_1.01_Gm01_10429344_T_C	Gm01	10429344	T	C	CCAGTAGTGTTGTCCTGCTAAGCGCGTCTGGCTGTGCTAAGCGCTTCTGGCTGCGCTAAG[T/C]GCGAATTGGTTTTTGTTGTGGAATTGGGCTTAGTGAGCCTGCTCGATAAGCCAATTCTCC	Y	C	0.662	0.50974	Y		0	0		0.139	0.255
BARC_1.01_Gm01_10460346_G_A	Gm01	10460346	G	A	ATATGCATCAGCTTAGGCATTGACGCAAGTCTGAGTGCCTTTGACGGGGAGGGTGAAGGC[G/A]TCCATAATGATGATCGCATCAGCATCGGCCCATGACCTCGATGGTGTCGCCGAAGCGCGT	N	B	0.824	0.68392	Unknown
BARC_1.01_Gm01_10481738_A_G	Gm01	10481738	A	G	GTACATTGAAAAAGCTAAACCTATTGGGCTTCTCGAGTCTCGGATGACGAAAGAGTGAGA[A/G]GTAAGGGTTCAAGAGGACTGCATGTTATCACTCAAACTGTAGAAGATTTGCAACAAGCTC	Y	B	0.436	0.36188	N
BARC_1.01_Gm01_10519570_A_G	Gm01	10519570	A	G	TTGGCTCGTGGTGGTTTGTTACCTACATTGTCACGGTGGTTTGCTACCAACATTGCCTTC[A/G]TCATTGTCGTGGTGGTTGCGGTGGCAACGACGGTCCAGAGGTAAGTTTTTTACATATCTA	Y	B	0.9	0.747	Y		0.229	0.021	0.121693	0.112	0.383
BARC_1.01_Gm01_10596580_G_A	Gm01	10596580	G	A	ACGAGCGACGATCCCCAAATATGTTCTTCACTTATTTCTGTGGGGATCGTCGGCCTTCCC[G/A]GTCGCAAGATTGACATGGACCAGCGATCTCTCTATCCCAACTGGTATAGTCGCTAATGAT	Y	B	0.652	0.54116	Y		0	0		0.158	0.051
BARC_1.01_Gm01_10645006_C_T	Gm01	10645006	C	T	CCTCACTCTCGCTCCCAAGCCTTGCTACCCTAAAACCTATTATGCCTCGCCTTGAAACCC[C/T]TCACTATCGTGCCACCATGCTTTGACCTTTGTGCCACCACAATGTGCCACTACTCTTGTG	Y	A	0.949	0.949	Y		0.234	0.021	0.125654	0.042	0.1
BARC_1.01_Gm01_10697006_C_T	Gm01	10697006	C	T	GGCGTAACTTGTACCAACACACTACTAAGTCTCCCACCTTGTTGATGCCCCGCTCCATCC[C/T]CATGCCTTTTTCCTTCTGTATGATCAAAAGTATATGGCTCCCCCTTCTTCTCTGTTCCCT	Y	A	1	1	Y		0.234	0.021	0.125654	0.115	0.381
BARC_1.01_Gm01_10736884_T_C	Gm01	10736884	T	C	GTCTTTGGAGAATAGACCAGTGGCGCGTCCATCCTGGATTTTCGCACAACTCACTAAGGA[T/C]GAACCTTGAGTTTAATGAACCTGGTGTGTTGTTCGAGCCCTGCACAACCCCGAACTTTAT	Y	B	0.976	0.81008	Y		0.234	0.021	0.125654	0.105	0.382
BARC_1.01_Gm01_10768239_C_T	Gm01	10768239	C	T	AGAAGAATAAGGTTTGTAGGTTTCAGGGAATGAATGAAGGGTTGTTAAGATAGTTCTGGT[C/T]TATGAAATTTGGATGAGTGCAACGTAGAAAAACCTGCTGTAAATATGCTTGGCATCAGCT	Y	A	0.9	0.9	Y	3UTR	0.321	0.021	0.168421	0.237	0.371
BARC_1.01_Gm01_10794527_T_C	Gm01	10794527	T	C	CTTAACACCAATAAATTGCATGATGGGAATCATTGCGGTGAAAATGCATATGCCATTGGG[T/C]AGTGAATGATGAAATCCAATAAAGAACTTCCAAATCTCTCTTTTATGTGACATACTCAAC	Y	A	0.9	0.9	Y		0.224	0.021	0.120419	0.032	0.093
BARC_1.01_Gm01_10855476_A_G	Gm01	10855476	A	G	TATACAAAAGTTAGTCGTAAATGAAGACTAACATGATTGTCGTCATCCTGCACAATGGTC[A/G]TCGTCGTGAGTGCGGCCTCTTGCCTTGTCGTCCTCAACTCTGCGTCTTTGCTCGTCACTT	Y	C	0.834	0.64218	Y		0	0		0.167	0.211
BARC_1.01_Gm01_10878180_T_G	Gm01	10878180	T	G	ACCCAAATAGAGGATCCGAGGTTTTGCGTTGGCTTGACGAGGTGGAGGAAGAAGCGTCGG[T/G]GTTGTACGTTTGCTTTGGGAGTCAGAAGTTGATGAGAAAGGAACAAATGGAAGCATTGGC	N	C	1	0.77	Unknown	CDS
BARC_1.01_Gm01_10940759_A_G	Gm01	10940759	A	G	CTGGTCTTACCCCAACTGTTGTGCCTGCCTTGGCATACAATACTTCTTAATGAAAGAACT[A/G]TTAATGAAGGGCCAAATGAACTTTGTGGGCGTGAGCGGTACCCCGTAGAACTGGTAGAGG	Y	C	0.652	0.50204	Y		0.12	0	0.0575916	0.49	0.204
BARC_1.01_Gm01_10980612_A_C	Gm01	10980612	A	C	TGCGTTTGAGGGTCGAATGGAGACCGAAAATTTGAATTAATGGTTTCATTTGCATGAAAA[A/C]AATGGGAATGAAACATTATTTCCACCAAAACAAAAAATACAAATAAGGATCTAAGTTCCC	N	C	0.748	0.57596	Unknown
BARC_1.01_Gm01_11047155_T_C	Gm01	11047155	T	C	ACGACGCCAAGGTCGACCTCGTCGTCGATGGCCTCCTCTCCTCCGCTGCCCCTCTGACTG[T/C]CGCGCCCTCGCCGCCACCCTCCTCACTAGCCTCGTCGTCCTCCATGTTAACAAGGCCACC	Y	C	0.58	0.4466	Y		0.224	0	0.109948	0.297	0.313
BARC_1.01_Gm01_11073410_A_G	Gm01	11073410	A	G	CATATCCTTGATTAAAATTGTTGGGGTAATGATTATAAGAACTATGTCCTCCCCATAAAA[A/G]TTGATCTCATCCATGGTTGTAGCTAGCTTGTCATCAATAGTGCATTCTCCTAGCTTGTGC	Y	C	0.5	0.385	Y		0	0		0.095	0.031
BARC_1.01_Gm01_11125656_T_C	Gm01	11125656	T	C	TCTCTCCCAAAGCTTGCCATGCATGATCCATCAGAGCAAGAAAAAAGTTGATGGCAGGAT[T/C]TGAGAGTGCCAGAGGTCCTTGAAACTAGATTGAGGGCCAGTAGATTGCTGAATATGACAA	Y	A	1	1	Y	CDS	0.224	0	0.109948	0.355	0.291
BARC_1.01_Gm01_11161689_G_A	Gm01	11161689	G	A	TATTGCAGACGATCTGAGTCTCTCCCGCATGCATCATCGAGTAGCACGAACTGTTTGTCA[G/A]CATCCTTTTGTCACCGCATTATGGAGGCACACATACCCTTAGGGTAGAAACAACTCAACC	Y	B	0.75	0.6225	Y		0.21	0	0.101064	0.439	0.216
BARC_1.01_Gm01_11238861_A_G	Gm01	11238861	A	G	ATATGCTATCTCTCGCCCATATTCTCTCTCTCACACACACAAAATGAGAAACACAATGCA[A/G]AAAACATAGCTAGTTGATTTAGCCCGGGTCAAAGTTGCTAACAAAAACATAAAGGGAGTT	Y	C	0.965	0.74305	Y		0.214	0	0.104712	0.308	0.307
BARC_1.01_Gm01_11262073_C_T	Gm01	11262073	C	T	CACGTAGACAACCAAAAGTTGCAGCTGTTGCCAAGGATATTGAGCATGTGGATCATGCTG[C/T]TGATTCATGGGGTTTTCCAGGCGGGCCCCAAGATACATCAATGTTGACATCATAAGCTGA	Y	B	0.481	0.39923	Y		0.203	0	0.0994764	0.389	0.198
BARC_1.01_Gm01_11390235_T_C	Gm01	11390235	T	C	CTAGTCCGAGGCAAACCTAAAACAAAATCCATAGATAAATCGTTTAAGAATATTCAGAAA[T/C]GGACAAAAGAGAATAAATACCATGAGGCATAACTTTAGACTTTGATTTCTTACAAACAAT	N	C	0.809	0.62293	Unknown
BARC_1.01_Gm01_11427007_A_G	Gm01	11427007	A	G	CTCTCTAACGATCCCCAATGGAGTCACCATCTGTCGCAACCCACCTCACGACGGGACAAC[A/G]AAAGAAAAATGGATAAGCCAAAGCGTTCGCCTCCAAGGGAGAAAACAAGCGGAGTCGCCA	Y	B	0.436	0.36188	N
BARC_1.01_Gm01_11496094_C_T	Gm01	11496094	C	T	TTCGACCCCAGCTGGCAAGGTCGGAGTCGACTCGACACCATCATTCAATTCCGAAAACAG[C/T]CCAGGACCAACATTCAAGCCCATAATCGACTTGGCACTTGCTACAAACCCAAAATCTACC	N	B	0.822	0.68226	Unknown	Intron
BARC_1.01_Gm01_11578448_A_G	Gm01	11578448	A	G	AGGGGGTGACGTTGGACAAGTATGATGTCACTACTAATCTAGATGAGCACATCGACAACA[A/G]TGTTGTGCAAGAAGGGCTCTTCATAATGGATGACATCGTCTTATGCAAGGTGTTCCTGAC	Y	C	1	0.77	Y		0.104	0	0.0520833	0.318	0.141
BARC_1.01_Gm01_11681921_A_C	Gm01	11681921	A	C	CGTCGGAACCGAGATGAGGCAGAGAAACCCTGTAGTTTTGCGGTTATCGTATTTAGTGAA[A/C]TGACATGTGACGTAGCTGGCGACAAACTTCCGCGTATCCTCCTTGATCGAGGGCCACGTG	Y	C	0.949	0.73073	Y		0.104	0	0.0520833	0.279	0.277
BARC_1.01_Gm01_11835461_T_C	Gm01	11835461	T	C	CACGCGTCCGTCACAAGGGATGACAACATCTAATCAAGTGTGCAAATCATAACTTCAATG[T/C]TATTTATTTTCCCTTTTAATATTTTTTACTTTTTTGGGGTCGACAAGGGTGTTTCCCTCG	Y	C	0.421	0.32417	Y		0.104	0.463	0.282723	0.01	0.192
BARC_1.01_Gm01_11904297_T_C	Gm01	11904297	T	C	ACATTGATGTTGAGGAGCAGACATTGAAGACATAGGTACTTACCTTTGTCGGAAACTTCA[T/C]TGATCAACGTCTCCGCCGCTGCTATGCAGAGATTGAAGACACAGAGGCACAGTGCACTTC	Y	C	0.668	0.51436	Y		0.156	0	0.078125	0.042	0.372
BARC_1.01_Gm01_11940697_G_T	Gm01	11940697	G	T	ATTGTTGACTGATTGATCTAGAAGAACTGTTTGAGCCACGAGATGCCTGTCCAAAATACT[G/T]ACTGATTGTTACACCTGTCCCTACCACACGTACGCGACCTGGATGCTCTAGCCGACCAAT	Y	B	0.7	0.581	Y		0	0		0.029	0.01
BARC_1.01_Gm01_11964049_G_A	Gm01	11964049	G	A	TCAGTCTCAACTCCGCTGCAACCTACCCGAGCACTTGCTACTTTTGTCACCGTCGTTGTC[G/A]CCGTAGTGACACCAAAGCCGGCAAGGGCGGCGAAACCTCCACCACTTTCAAATACACTAC	N	B	0.877	0.72791	Unknown
BARC_1.01_Gm01_11990011_C_T	Gm01	11990011	C	T	TCAAATATGTGACCCCAACATCGTCGAACATCTCCATCACCACCATATCACCATCTGCGA[C/T]CCTGACATCGTCATGCGTGTTGTGCTAGTTGGTGCAGGTAGTGGCACACGGTGGGAGAGA	N	C	0.877	0.67529	Unknown
BARC_1.01_Gm01_12231584_G_A	Gm01	12231584	G	A	AGCATTACGGGTGTCCCAAAAGCCTCGAAAGCCCATTATTTTAACTAAACGGGGGAGGTG[G/A]TTGCCACCTAACTCGCCCAGGCGAGCTCAACTCGCCCAGGCGAGCTAGGTTGCTTCCACC	Y	C	0.512	0.39424	Y		0.115	0	0.0572917	0.303	0.138
BARC_1.01_Gm01_12350055_T_C	Gm01	12350055	T	C	AAGCATGTCGCCATTGGTACTGGCGGGACATGCCAACGGGGCAGTCCCGCCACTGGCGCC[T/C]GCGGAACACGTTGTAGCATGTGGGGTTGCAGTGTTTCAGTCTGAAAAAGTTGGGTAGGCT	Y	C	0.739	0.56903	N
BARC_1.01_Gm01_12440577_A_C	Gm01	12440577	A	C	GCTTTGTCAACCAAAACACAAAAAGATCTAAACACAAGTCAAAACACACAAGATTGACAA[A/C]CATTGTGTTGTGGTTATCTATCGAATCTCACACACATCTTAAGGTGTCACCTTTTCACTA	Y	D	0.642	0.43014	Y					0.121	0.121
BARC_1.01_Gm01_12536536_A_G	Gm01	12536536	A	G	GTGTCAGTAGCAAGAAGGATTGCAAGGAAGGTGAGTGCTCGTGGCGGTGGCCTCCCCACT[A/G]TGCAAACGATTGCGCTTGTCCATGAGGACTCAACTGAGATAGCCTGCATGCTTTTGGACT	Y	A	0.878	0.878	Y	CDS	0.032	0	0.0157068	0.347	0.126
BARC_1.01_Gm01_12634188_A_C	Gm01	12634188	A	C	GATTCAAAGACGGGTAGCCAAAGCTCAAGTGTAGGTGTTTCTAGAGGTGAGTATTTCCTC[A/C]TTGTCCATCTCTATCCCATTTTTATGTGTCGTCTTTCGATTTTCCCCTTTTTCTAACCGT	Y	D	0.988	0.66196	Y					0.042	0.042
BARC_1.01_Gm01_12807171_C_T	Gm01	12807171	C	T	AGATCTTAGCTAAATTTTAAAATATTGAATTAAAACTATCAAATGCAGATATTTTGTCAG[C/T]AGCAAATATATATTTTTGTTTGAAAATGGAGTTTGAGTGTTGAGCAATGAGAGCCAAAGT	Y	C	0.811	0.62447	Y					0.026	0.026
BARC_1.01_Gm01_12853172_C_T	Gm01	12853172	C	T	TAATGTATGAGAAAAACGGTTCACTACAAACAAGTACTGATTACCTTGGGTTCAACCCAC[C/T]GAGGTTCAACCCACCGAAGAAGACTATGGAGCTTGTGATTAATGGAATAAGGGACAACCA	Y	C	0.842	0.64834	Y		0.12	0.453	0.281915	0.063	0.213
BARC_1.01_Gm01_12902650_G_A	Gm01	12902650	G	A	TTGCGTGATTAGGGATTTAGGGTTTGAGAAACAAACCTCACCAGTGTTGGGAAGGTAAGG[G/A]CGACGATATCGTCGGGTTTGATTCTGGCAGTGACCAACTAGGCGGACTAGGGTGGTTGTG	Y	B	1	0.83	Y		0.115	0	0.0572917	0.279	0.13
BARC_1.01_Gm01_13003704_A_G	Gm01	13003704	A	G	CTCGCATCGACAGCTAACCAACAAACTGTTTCCACCTTTCTACTTCCACTTTTCTTCGAC[A/G]ACGACGTTGTTTCCAACGGTATTGTCGTGTCCCTTCACGGTGGTCACGCTCCCCTCGATG	N	B	0.842	0.69886	Unknown
BARC_1.01_Gm01_13063284_C_T	Gm01	13063284	C	T	TTATTGTGGCAAGCATTTTGTAATTTTCATTTATTGTTGCAGACCTTTTGCTTCTCTCTT[C/T]CTTCAGAAATCCTAAGCGCCATTTTTTTTTTACCATTTTCACTTTCTCTCATTTCTCTCT	Y	B	0.518	0.42994	N
BARC_1.01_Gm01_13169179_A_C	Gm01	13169179	A	C	ACAAGAAGAAGAAGAAGAAGACAACAAAGACTAAGGTCGCCAAGAAGAAAAAGAAGTTGT[A/C]CCTAGGTAACATGGCTATGTGTCACGGTCGCAAAGAAGCTGTACAAAGAAGCTGAAGAAC	Y	D	0.449	0.30083	N
BARC_1.01_Gm01_13222812_C_T	Gm01	13222812	C	T	GGACGAAGCTGAAGGCAGAAACCAATCAAGGTAAAATGGTAACGCGGCCACAATTTGCTG[C/T]GCAATGTCGTTTCCTGCTTTGAGGTACTTAGGGACGGACGCAAGTAGAGGCTAGGGTCAC	Y	C	0.436	0.33572	Y		0.26	0.484	0.371728	0	0.249
BARC_1.01_Gm01_13281204_T_C	Gm01	13281204	T	C	TTACACTGATGGCCTATTACCTATTTCTTATCACAATGGAAATAGAGGCCTCCATCTTGG[T/C]GGACGACCAACTCCTCAAGTGACAAGCAGCGAACAGGTAACTTGGGTGGACCTGTTGTTG	N	B	1	0.83	Unknown
BARC_1.01_Gm01_13328966_G_T	Gm01	13328966	G	T	AGAACCAAGGCCCCGTAGATGGAGCTGACCTGAAAAAAAGATACATCCACCTAAATGTGT[G/T]TGGTGGCAGCCCAGTATATGTACCTTATTTTCATTCTTCTTAATTACACATTCTGTGAAA	Y	C	1	0.77	Y		0.242	0.229	0.232804	0.174	0.217
BARC_1.01_Gm01_13374753_A_G	Gm01	13374753	A	G	AGCTGGAGAAATTATGAAGAAAAGAAAAAAGCCAGCAACAAGGCCCAGCCCAGATGCCTC[A/G]CTTAGCGTGCAGCTCACGCTGAGTGAGCCAGGAGACACAGGCGCTAAGCGAGGCGTTAAG	Y	C	0.7	0.539	Y		0.156	0	0.0789474	0.125	0.344
BARC_1.01_Gm01_13433545_G_A	Gm01	13433545	G	A	CACCCCTGTCCCATCGTCCTGTCAAGTCACGCAATTTGGTGATTTTGCCGGCAAGGAAGG[G/A]TTTTGTATAGGACCATCTTTGTTTTTAAAGGTTAGGGAAATAAAAGTAATGACTGCTCCC	N	B	0.949	0.78767	Unknown
BARC_1.01_Gm01_13540421_G_A	Gm01	13540421	G	A	TTGATGACAATCCTCTCCGCTTAGTTTCCCTTGGAAGAGTTATGAGGGGTCGACAACCGT[G/A]CACCATGTCCCTTTGGACAATGATCTAGTGAAGGTAGGGGTTGAGAAAGTTTGAGATGTT	Y	C	0.799	0.61523	N
BARC_1.01_Gm01_13730960_G_T	Gm01	13730960	G	T	CTTAGCCTATTCTGCAGAAAAAAATGTTTTCTGTGTCTTCGAGCAGCGCTTAGCACTTGA[G/T]TTAATTTCATAAGGCGCGCTATGCACACATGCTGCGCTAAGCGCCCAACTCTGTTTTCAG	N	C	0.627	0.48279	Unknown
BARC_1.01_Gm01_13782300_A_G	Gm01	13782300	A	G	TGGTTGAACAAAGCCACAATTACTACAAGGTGCAGCAGCAGCAGGAGGAGCAACAAGCTT[A/G]GCAATGTCCTTGTAACTCGCACAGCTCCTCGTACAATTGTGCTTATTATTATGCCTCACT	Y	B	0.9	0.747	Y	CDS	0.427	0.442	0.433862	0.031	0.389
BARC_1.01_Gm01_13829876_T_C	Gm01	13829876	T	C	AAAATCCAAATTGACAATGACCTTTGCCCATTCTGCCATAGCCAACCTGAATCTGCCTCC[T/C]ATTTGTTCTTCGTTTGTGCTAAAGTTCTGCCTCTGTGGTGGGAATTCTTTTCTTGGGTGA	Y	A	0.517	0.517	Y		0.427	0.437	0.431579	0.031	0.389
BARC_1.01_Gm01_13861912_T_C	Gm01	13861912	T	C	CATTTTATTCGCTAAGCGCGGCTTTGGCCCGTTAAGCAAGAGTTGCAAGACCAATCAAAG[T/C]TGCAAAACTCGCCCAGCGCGTACCTTCGCGCTAAGCCTAAAAACTTCTCTGGAATTTCAT	Y	A	0.529	0.529	Y		0.427	0.438	0.431579	0.063	0.401
BARC_1.01_Gm01_13968368_C_T	Gm01	13968368	C	T	AGGCTAATCTATAAGAAAAAATGCTTTGATTGACGTCAAAACTGCAAGGGTGGGGTCGTG[C/T]TGGGATAGCAACCACAATGCTACAAAATATGGTCAGAAAAGACAATTCATGTGTCGTCAT	Y	B	1	0.83	Y		0.354	0.431	0.391534	0.021	0.268
BARC_1.01_Gm01_14032461_T_C	Gm01	14032461	T	C	ACCACTGACACATCTTCCCACACCTATGTTCGAAACGTTTTTCGTGGTTTCTCATGTCCT[T/C]TCTTGCTCCTAATCTTTAGGCATAATACTAGGCTTTTCCAACTTTTTATGATGTGTGGAC	Y	B	1	0.83	Y		0.427	0.441	0.433862	0.021	0.385
BARC_1.01_Gm01_14065084_G_A	Gm01	14065084	G	A	ATTTGGTGGACCTAGCCCACACCATCTTACTATCGCTTTGTCGTGCCTATGCCAAAGATT[G/A]TTATTCCTTTCGATCCGCATTCACCACCTACAGACAATGTGATGTCCTCTACTAGATCTA	Y	B	0.9	0.747	Y		0.354	0.436	0.393617	0.093	0.297
BARC_1.01_Gm01_14097047_T_C	Gm01	14097047	T	C	AGTACCTACCTTGACAGTTAGATACTTGCATATCATAATCATAATGGCCAAACTACCTAG[T/C]TGTACGATGCTAGGGTAGGCTATCTAGAGAACATTCGTGCTTAAGGTCCAAGGCTGACGA	Y	A	1	1	Y		0.432	0.442	0.43617	0.063	0.398
BARC_1.01_Gm01_14222617_C_T	Gm01	14222617	C	T	TTACAAAGGTTACCCTTTTAAGCTATGAGGCTCCAACAAATGATTCCATAATAGACATGT[C/T]CATTCTAGCATTCCTCCCGATCGAAGTGAATAAAATCCCAAAAGGGTTTTTTTTTTCACC	Y	C	1	0.77	Y		0.354	0.432	0.391534	0.01	0.267
BARC_1.01_Gm01_14271188_C_T	Gm01	14271188	C	T	TCATCAAACAAAGGGCATCCGCACCATCAAAAAGAGCCCCTACACCGACTTCAGCTCCAA[C/T]GCTACCTCGCCCCCCCAACAATGCCAATCTTGGCATGAGCTCTAACATGGGAAGAAACCC	N	B	0.915	0.75945	Unknown
BARC_1.01_Gm01_14315930_G_A	Gm01	14315930	G	A	TGAGTTTCTTGCCCATTTCCTTCTAAAATGTCATGAAACCCTACGGATTGCGTTGTGATT[G/A]CTGTTAAGAAGCTCAACTCGGCTGGAAAAAGTCCCCATGTTGACAAAAATTGCCACCATT	Y	A	0.5	0.5	Y		0.358	0.426	0.391534	0.176	0.321
BARC_1.01_Gm01_14346729_C_T	Gm01	14346729	C	T	TTTTGTTCTTCCCTCCTTCCCCTATTGAAAGGAGGACCTTCCCTCCTTCTAGAGAACTTC[C/T]TGGAAGGCCCAAGTGGGCCCGGTTGCTATTTGCAGCCTCCTATTTACTAAATACACCCCT	N	B	0.949	0.78767	Unknown
BARC_1.01_Gm01_14376222_A_G	Gm01	14376222	A	G	CTGATGAAGTTGGCATTGAGGAGCTTGTCTACTTTTTCTCTGACTGCTTTATGTTGTTCT[A/G]CTCCCATCTTCCTCTTCTTTTGTGATTCCGGGTTGACTTGGGGACAGATGGTGAGCTTGT	N	A	0.742	0.742	Unknown
BARC_1.01_Gm01_14437321_C_T	Gm01	14437321	C	T	CCAAAGATAAGGCCTAAATAGTGCTTATAGAATTTGGATAGTCCTCACCTTTGAAGCTAG[C/T]TTTTGTGGGGGTTAAGTTACGCCTTAAGCCCAAGTTCTAATTTGATATCAGAGTTTATCT	Y	A	0.742	0.742	Y		0.427	0.442	0.433862	0.06	0.398
BARC_1.01_Gm01_14537350_C_T	Gm01	14537350	C	T	CTCCCAGTTTGACTCCAGCACAGACTCCAACTATTCCTGCTCCACTTTCATTTCATCTTC[C/T]AGCTCTTTCATCTTCTAGACCATCAGAGTTTTTATTTACACCAGAGATGCTTCATTCTAT	Y	B	0.683	0.56689	Y		0.073	0.01	0.0416667	0.167	0.083
BARC_1.01_Gm01_14599880_T_C	Gm01	14599880	T	C	GTGAGGACAATATTCCTCTCCTGCAATCGGACAACTGGCCAAACCAATTTCTCGTGGCTA[T/C]TGGACAGCGGTAGTGCCTCCTCCATCTGAACCTTATACACCTTCTCGTTATCAACAACAG	Y	C	0.839	0.64603	Y		0.073	0.01	0.0416667	0.16	0.08
BARC_1.01_Gm01_14635839_C_A	Gm01	14635839	C	A	ACAGTGGCAACGACGCAGAAGACCTTCAAAAATCGCCAAAGGAAGTTTGGGTCCCTCGTT[C/A]GGGTTGCAATCTTATAATTTTGGGTATAATTTAAATTTTCGATAGAAACGGATTCTGTTG	Y	B	0.976	0.81008	Y		0.427	0.447	0.43617	0.026	0.385
BARC_1.01_Gm01_14660270_T_C	Gm01	14660270	T	C	TGATTGAGCATTCAAATCCATTCTCTTCAATTGGAGAGGAAGCCAGCATAAGGGAGCCCA[T/C]TCAACCTAAAGCTAACAAAGACTTATGGCAAGGAAATCTATTCCATTCATTCAGGCTTTT	Y	B	0.842	0.69886	N
BARC_1.01_Gm01_14777200_A_G	Gm01	14777200	A	G	CTCAAAGAGACTATTGGAAGTCAACACACAAGATGGTCCCGCAGCCCAATGAAAGTTGCT[A/G]ACTAGGAAAACTGAGGAGCTTACATGGAAAATTACCGATCATCCTCAACAATTCAAACTT	Y	C	1	0.77	Y		0.427	0.442	0.433862	0.063	0.4
BARC_1.01_Gm01_14818197_C_T	Gm01	14818197	C	T	CTCTCTCGATTTTAGCTTGGTGTTGGATCTCTTGACCATTCTTTGTTAGCATGCTTCTTT[C/T]GTTGTCATGGCTCAATCTCTATTTTCTTTGATAAGGTTGAGTTTTGCCCATAGCGTGTTA	Y	B	0.988	0.82004	Y		0.13	0.417	0.269841	0	0.185
BARC_1.01_Gm01_14866332_C_A	Gm01	14866332	C	A	CTCCCTACATGTCACCACTGGAGCTACCGGACCCTATCATTGCCCATCCCAAGAGGAGTA[C/A]GCAACCTATGTGGCATGGCCAACGAGCTTTAAGGACAATTTCAATGCTGGCTAGGGAGGT	Y	C	0.996	0.76692	Y		0.073	0.01	0.0416667	0.206	0.096
BARC_1.01_Gm01_14889646_C_T	Gm01	14889646	C	T	CGAAATTTATGGATTACACGGTGACGAGTGTTAAGCATATTAAATCGGTGAGCCAAAGTC[C/T]GTACATTGACGAACAATTGTCCCCAGACGAGACACTGACCAAACCATTATACCGCTCCGC	Y	C	0.6	0.462	Y		0.073	0.01	0.0416667	0.247	0.098
BARC_1.01_Gm01_14910545_C_A	Gm01	14910545	C	A	GCCCACGGAATTGATTCTTCCAAATGAGATGGATAAAAGCTGACTTCGTCTCAAGGTTCA[C/A]CACATTGGTGAATGTTGGCCTTGCAATTGTGTTGAAGTGCAAAGGTCCAATTTATGTAGC	Y	B	0.988	0.82004	Y		0.354	0.436	0.393617	0.031	0.274
BARC_1.01_Gm01_14955903_A_C	Gm01	14955903	A	C	TATAATTGTGGCAAATTTGGATGGCACTTTGGTTGTCACAATAAAGATCAGTGGAGGAAA[A/C]TTGAGGTACTTCTAAATCAACAAGAAGCCAACGAAGCCATGGTATCAACAAGTGTATGAT	Y	B	1	0.83	Y		0.358	0.448	0.402116	0.129	0.314
BARC_1.01_Gm01_15031149_G_A	Gm01	15031149	G	A	CTCTTCCAAACCTTCATCTCCAAACATTAATAACCTCACTGTCCTCCTCTCCACCGTACC[G/A]GAACTCTCCTAATTCACCTCCCTCCTCGCCTCCGTCACGCCCCTCATCGTGGATCTCTCA	N	C	0.765	0.58905	Unknown
BARC_1.01_Gm01_15078013_C_T	Gm01	15078013	C	T	ACGGTAGGTCAGTTTAAACATAAAGAAAGCAAGCAAATTATAAGACACAAAGATTTATAA[C/T]GCTGCATCTCAACCATCAAGACGATGTGTATTTCTTGGCAAACCACTAACTTCTCAAAGT	Y	C	1	0.77	N
BARC_1.01_Gm01_15146549_G_A	Gm01	15146549	G	A	AGGAAGGCCAGGGGTAAGAGATCAGAGGCCCCCACTACTCTAGCAATGCCAGACACTTCA[G/A]CTCCTTCTTTATCCACCTTGCCTACTCCTACAACCCCATCTACTTCTACTTCACCATCCA	Y	B	0.842	0.69886	N
BARC_1.01_Gm01_15183525_T_C	Gm01	15183525	T	C	AGAATGAGGAGCTACAGAGATGATCTGGCCACAGGGAGATAGGTATTTGCTACAGTGAAA[T/C]AGGATGCTTGATAAGCTAGAACTAATAGAGATTCACCACAACATAGCTGCACTTCGCCAC	Y	B	1	0.83	Y		0.427	0.447	0.43617	0.031	0.386
BARC_1.01_Gm01_15211373_T_C	Gm01	15211373	T	C	TGATAGAACTGAAATGGAAATAACACCTAAAAGGAAAAATTTATTTAAGGCCCCCATCCA[T/C]AACACGAGGGCAATGCTTTGGTTTGTCTCATCCAATCACAACAAGAGTAGTAGCAGAAAA	Y	B	0.842	0.69886	Y		0.427	0.438	0.431579	0.042	0.395
BARC_1.01_Gm01_15325163_C_A	Gm01	15325163	C	A	TTTAATGGTGATTTTCCACCATGGAGATGCAACGAAAGACAAAAGAGAAGAGGTGAGAGG[C/A]GGTGCCATCCACTAAAGGAATAAGCCATGGAAGAAGGAGTTTCACCATTAAGATGAGCCT	Y	B	0.43	0.3569	N
BARC_1.01_Gm01_15346821_A_C	Gm01	15346821	A	C	CTCGCGCTTAGCGCGCGACCTTGACATTGATGCTCTGCTAGATTCTTCTGTCGTGCTATG[A/C]GCACTGAAGCTGCGCTTAGCGGTGGATACACGCTTAGCCCAATAGATGAGCTAAGCTCAA	Y	C	0.414	0.31878	Y					0.17	0.17
BARC_1.01_Gm01_15368897_G_A	Gm01	15368897	G	A	AATGCCATTGAGGCATTTCACCGAGCACTTGTGCTTGCCCAATCATTTCAGAACAACCCT[G/A]GGCCTAAGGCCATCCCCTACAACCCCCCAATTCAATGAATCAAGGCATGAATTTGTCCCT	N	A	0.716	0.716	Unknown
BARC_1.01_Gm01_15427992_C_T	Gm01	15427992	C	T	TCACCTAGTGATCATAACTTCGATCTCCCTCTGCCGAAGTGTCAGCTGGTGTATGCCATC[C/T]TGACACATATGAGCATTCACGTGGCTCAGCTGATTGCTGACGCCATCTATTTGTTTGCAG	N	C	0.434	0.33418	Unknown
BARC_1.01_Gm01_15479696_A_G	Gm01	15479696	A	G	AGGCTTCAATGTTGTTACCATGAGTCGACAAGATGTGTCACAAGCACAAATAGCGATTTT[A/G]AAATTTTGAATTGGGTCTTCCAGAGTGTTTTTCGAACTGGGTTGCTTCCGGAGGAAGCAA	Y	C	0.519	0.39963	Y		0.073	0.01	0.0416667	0.195	0.093
BARC_1.01_Gm01_15542343_A_G	Gm01	15542343	A	G	CTATCCAAACGTACTCGAGTTCACGAGTTCACCCACAATCTGGTGTCGTCTAACCCAAAA[A/G]AAGAAAGAAATCTAAAACATTAGCAACATCTAATTGTACCTGTTATACAAAATAGAAACA	N	B	0.996	0.82668	Unknown	3UTR
BARC_1.01_Gm01_15588373_G_A	Gm01	15588373	G	A	CCTCCACCTTTGGGCGCATTCTTTGAAAGATCCATTCCCCCTTTTGCCACATATTCTGTA[G/A]TTGCATCCTATTCGGAACCATATCACAATTGTATCGATACTGCCTAACGAAGGCAACCAT	Y	B	0.436	0.36188	N
BARC_1.01_Gm01_15666499_A_G	Gm01	15666499	A	G	TGAGGACTACACATCCTCTCCTTCAGAGGACTTCACATCCTCGCCTTCATAGGACTCCAC[A/G]TCCTCACCTCCAGAGCACTTCACTTCCTCACATTCAGAGGACTACACATCCTCGCCTTCA	Y	C	0.414	0.31878	N
BARC_1.01_Gm01_15737613_A_G	Gm01	15737613	A	G	CTATGGGGTTGTATGTGCAACATCAACATTCTACACAGTTGGTGGCCTTTGGAAAAATAT[A/G]AGCGAGGGTCTACTATACACAGCATGGCGTATGCAGATGATTTCGTAAGGGTTAGTGTTG	Y	C	0.716	0.55132	Y		0.073	0.01	0.0416667	0.269	0.267
BARC_1.01_Gm01_15778305_G_A	Gm01	15778305	G	A	AAGCAAAAAACGAAAATGGAGTTGCTATGTGAACAGTACCATGCGTGTGAACAGTAACAC[G/A]AAAACTGAAAATGAAACCCTACAATCTCCCTCCCTGCGTGAATAGTAACCTCCCCTTAAA	Y	C	0.436	0.33572	N
BARC_1.01_Gm01_15819729_T_C	Gm01	15819729	T	C	TGGAATCACAATTAGAAATGTTGGTCAGTGGATAGATTGATTGTGAAAGAAAAGCTTGAA[T/C]GCCTTACGGTGTTGTAAACAAATGTAAAATTGCCTGTCATACCCTAATTTCGTCTGGGGA	N	C	0.73	0.5621	Unknown
BARC_1.01_Gm01_15851740_A_C	Gm01	15851740	A	C	GGTTCAAGTAGGCGAACGCTGACCTGTAGGAATCCATACTTATGATACCCAAAAAAAATG[A/C]AGGTTAGCTCGCCTGGGCGAGCAACCTCTTCACGAAGGGGGTTAAAAAGGGGGAGGGGGA	Y	B	0.9	0.747	Y		0.427	0.441	0.433862	0.031	0.387
BARC_1.01_Gm01_15915773_G_T	Gm01	15915773	G	T	AAGATCTGAAGACTCTCAATCAGAGTGTAGCACGCACTCAGTGCACAGAAGTCACATGGA[G/T]AAACCAAATATCACGTGAAGGTACGCTTAGCGCGTAACCACCGACTCACTCGCTAAGCAC	N	C	0.822	0.63294	Unknown
BARC_1.01_Gm01_15940461_A_C	Gm01	15940461	A	C	AGCACTATTAGATCTCTAGTTTATTTTTCCCACCAGCTAAAGGCAGTTTCCTGTTTTGAC[A/C]CTACCAACTTTAACACTGAAAATATAAATCCTCGACATGCATGGTGGATTAAGGCAAAAA	Y	A	0.965	0.965	Y		0.427	0.447	0.43617	0.061	0.397
BARC_1.01_Gm01_15980877_G_A	Gm01	15980877	G	A	GATTTTGGTGGGTGAGTTAGTGGAGTTTTGGTGTCAATAGTTGGTCATGCAAGGGCTTAG[G/A]AGGAGGGTAGGTGTTAACCCTAGGTCGAGCATGAAAATGAGGTGTTAGTTAATTATGGAT	N	B	1	0.83	Unknown
BARC_1.01_Gm01_16051744_C_T	Gm01	16051744	C	T	ATGATACACAATGCAAAATAGATATCAAATGTACTAAGATACAACAACCAAGATAACAAC[C/T]GATACAAATGCGACTCGAGGGAGTTGGGCATGTAAAAGCTAAAACTTCTTCAAGCTTTCC	Y	A	0.436	0.436	Y		0.354	0.427	0.389474	0.031	0.273
BARC_1.01_Gm01_16091966_A_C	Gm01	16091966	A	C	TGTCAGTGTGACCTCCAAATTCAGAGAGCTCACCAATTCTCGTGCAATAAAACTGTGACT[A/C]TCGCCACTGTCAACGAGGAGGAGGATGGGATATTCGGCCAACTCCCCTTCCAACTTGATG	N	B	1	0.83	Unknown	CDS
BARC_1.01_Gm01_16146885_A_C	Gm01	16146885	A	C	CCTAGGAACTGGTTGATGGCATCCTCATCATAGGGAATCCATTGGCCTGGCACCCAAGAG[A/C]ACTTATCAATGAATCCTTCTTCGGTGGGCTAGGCATTTGCATAGAATTCCATGACTATCT	N	A	0.496	0.496	Unknown
BARC_1.01_Gm01_16176695_A_G	Gm01	16176695	A	G	ATCCCTCATGCACCTCTATTAGCATTTGTTTGGCTTCTCTTGCATCCACACACCGAATCA[A/G]CACCATGTCATGATTCCTCTTGTACAAGACATTTCCACTCAAGAGGAAACCGGTGGGTAT	Y	A	0.609	0.609	Y		0.422	0.437	0.427807	0.008	0.389
BARC_1.01_Gm01_16254492_C_A	Gm01	16254492	C	A	GATGGCGCTCTTGGAGTGCAAGGAATTTGGAGGGATCGTGAGGTCCTTATGTGTGTGTGT[C/A]TATATATATATATATGTACTGTGTGATGTGGGAGCTAAGAGTAGACTATGGGAAAACATT	Y	C	0.996	0.76692	N
BARC_1.01_Gm01_16319888_C_T	Gm01	16319888	C	T	GGCCTTGAGCTCGGCTGAGCGAAAGTTGTAGGAATTTTCATCTGCACACCTCACTAAGTG[C/T]CGCACTGTGCGCTAAGCCCAGACCAAACAAAATTTGAATTTCAAAATTTGGGCTTGGGCT	Y	A	0.59	0.59	Y		0.427	0.432	0.428571	0.313	0.393
BARC_1.01_Gm01_16388569_G_A	Gm01	16388569	G	A	GGTGGTGTGCTGCGGCGGTGGTGGAGAGGATTACGAAGGCGTCAAAGGCTGCGGTGGCGG[G/A]TGCAGTGGCGGTGCTGTGGAGCTTGTGCTGTTTGTGCAGGAACGTGAAAGTGAGAGATGA	Y	B	0.673	0.55859	Y		0.382	0.432	0.406593	0.083	0.439
BARC_1.01_Gm01_16439482_T_C	Gm01	16439482	T	C	TGGTTTTCAGCAAACTTCACCAAGCCTATCGTGCCATCACTGTTCGGGCACAAACCTATT[T/C]CGAGCTCATAACCATCTCTTAACATAACTCGGGCCACCATGAAAGAGGCACCTGATAAAC	Y	C	0.652	0.50204	Y		0.427	0.438	0.431579	0.064	0.404
BARC_1.01_Gm01_16483318_A_G	Gm01	16483318	A	G	AGTAGTGGGTTTTCTACCACTACCACCCACAAACCCCGTAGCAGCAGCCCTTTGATGGTT[A/G]GGGCAATTTTCATGTTGCTTAAGAAGGGTTGGGTATGGTTTTCCCAAATTTTGGGACCCA	Y	B	0.7	0.581	Y		0.427	0.438	0.431579	0.063	0.402
BARC_1.01_Gm01_16580419_T_G	Gm01	16580419	T	G	TTGTCTGATGTCACCCATAAAATTTTGCTTCGAGGTCGGCTAGGGTTTTTCGTGCGAATT[T/G]AACCGAGGTTGTGTTTCAACCGAAAAGTGTCGACTCTAATTTTATCAGCTGAGAAAACTC	Y	B	0.436	0.36188	N
BARC_1.01_Gm01_16610088_T_C	Gm01	16610088	T	C	CTCTCGTCAACCACCATTCTTACACCATCATGCACTCCTCCTTTGTTACCTACACCGGCG[T/C]GCACGAATTCATCCACCGTTCCTTTCAAACACCTCTCGCCGGAGGAACTAGCCATACGAT	Y	C	0.759	0.58443	Y		0.156	0	0.078125	0.264	0.29
BARC_1.01_Gm01_16718422_G_T	Gm01	16718422	G	T	TCACCTTCAGAGCACTACACGTCCTGACCATCATAGGGTTCCAAGCCCTGACATTCAGAG[G/T]ACTACATGTCCTCGCAATCAGAGGGCTGCACACCCTCGCCTTTAGAGGACTTCACGTCCT	Y	B	0.598	0.49634	N
BARC_1.01_Gm01_16841932_G_T	Gm01	16841932	G	T	CTGGCCATTTTCTGGCAATCCTGTCACTGTCTTGTATAGGCTCAATTTATATCTATATTC[G/T]GCCAGAGGCATGACACAACCAGAGACCATGCAGTTGAGGGGATTAATTGGGGATGTTTCT	Y	B	0.965	0.80095	Y	Intron	0.156	0	0.078125	0.431	0.241
BARC_1.01_Gm01_16865054_A_G	Gm01	16865054	A	G	CTTTGAAGTGCCTCACGTCTCAGCCGGCATCCTGCTCTCGAGGGGGTGGAGTCCTGGACC[A/G]AACTACTCATTGCTACGTTCATATTATATATTGAACATATACATGGGAGAATTATATATT	Y	B	0.723	0.60009	N	CDS
BARC_1.01_Gm01_16907323_C_T	Gm01	16907323	C	T	TTCGATACTCGATTCTTACCATTTTATACTACTTGCGCGATCCGGTGCACTTGCCGGAAG[C/T]GAACAGAGTGTCCTCACACAACTGGGCAAGTTTAAATGCTAATTATCGGGGTAACCTTAT	Y	C	0.768	0.59136	N
BARC_1.01_Gm01_16992535_C_T	Gm01	16992535	C	T	TTTCTATGATGCTCCTTCTCACATCAGTCCAGGTGGGCATATAACCTAGCCCAAACTTTC[C/T]GTGGTTTTCCTTCACGTCCATTAACCTGGCCATGCCATTATTATTCTTTCCCAAGCCCAT	Y	C	0.719	0.55363	Y		0	0		0.021	0.007
BARC_1.01_Gm01_17023882_A_G	Gm01	17023882	A	G	ATGCTTAGGCCTTTGTAAATGGCCCGCCTCAATTGCATTTACAGCCAATCCACCATGGTT[A/G]GCGAGCGGATTCGTCTTCATATTTGGCCCATCTTCTTGGAACGTCAACCATCCCGCCTCA	Y	C	0.8	0.616	N
BARC_1.01_Gm01_17053851_C_T	Gm01	17053851	C	T	GGCGCTGCTAGGGGCGGAGTGAACAGACGTACTGGGAGGCACACAAACAGATTGATGGTG[C/T]CAGAGTGAACGAAGTAGGGTTAGATAGGCTAAGTTTCAAACTTCGCCACATTCAAAGATG	Y	C	1	0.77	Y		0.156	0	0.078125	0.021	0.374
BARC_1.01_Gm01_17107491_C_T	Gm01	17107491	C	T	AAAATAAATCTGGACGACAAATAAAATTGTCTGCTCTCTTTAAGTCCAAGCTGGTTCAGC[C/T]CAATTCCGGATCCAAACCCAATTGCTTATAATTCTCCTGAAATTAAATTAAAACACATAA	Y	C	0.436	0.33572	N
BARC_1.01_Gm01_17130039_A_G	Gm01	17130039	A	G	TGTGTAGCCCTCTCAAGGTGAGGACGTGTAGTCCCTTGAAGGTGAGGGCGCGTAGCCCTC[A/G]GAAGGCGAGGACGCGCAGTACTTAGAAGGTGTGGGCGTCCAACCCTCTGAAGGCGAGGAC	Y	C	0.604	0.46508	N
BARC_1.01_Gm01_17180922_C_T	Gm01	17180922	C	T	ATCCTTGCGGCAGATGTTCAGCTTAGCGAGCACTTGCCAGCTAAGCCAATTATGAAGAAG[C/T]TGTAGTTCTGCAACATCCGCTAAGCAGCTTGACCTGTCGCTAAGCGGACGTGTCTATTTT	N	B	0.599	0.49717	Unknown
BARC_1.01_Gm01_17280704_C_A	Gm01	17280704	C	A	AAGAATTGAACCGTCTGATTCGACAGAATGGGCCACATCAGTTCAGCTCACTGCAAGGAT[C/A]AAAAATGCATTAGAACTGATGTGATCTTGTGATGCAATCCTCCCTAGGAAGGGACCAGTC	Y	C	0.949	0.73073	N
BARC_1.01_Gm01_17301987_C_T	Gm01	17301987	C	T	CACTTGTGTCTACTATGCAACCGCACGAATTGGACACTTAAATACTCGTAGCAACCACAA[C/T]TGCAACGCAGGTTTTAAGGCTTGAGAGACAAATTTTTCCTGAATCACATGTTCGTCGTTA	N	B	0.768	0.63744	Unknown
BARC_1.01_Gm01_17323929_C_T	Gm01	17323929	C	T	GAACTGGTGTGTTATAATTCTCTAGTTCCAAATGTAGGTGTGGTGGTGATGGCTATGGAA[C/T]CAAAGGATCAAAAGCTGGTGGCCGGGTGTGGGTGTTACGTAGGCATTTTCCCAACGGGCG	Y	C	0.949	0.73073	Y		0.156	0	0.078125	0.122	0.346
BARC_1.01_Gm01_17347002_T_C	Gm01	17347002	T	C	ACCTCCACCTCGAATGGTAATACGGCTTCCATTTCACACACCAACGAAAATGGTGTTGCC[T/C]TAGTTGAAGTGCATACTGAAGTCCGCTAGCCATGTAGCGTGAAGGGGAGCATCTCGTGCC	N	C	0.9	0.693	Unknown
BARC_1.01_Gm01_17379113_G_A	Gm01	17379113	G	A	ATTGGATGCCACACTGGTCACTACGCACGGAATTGATCAGTGGACGTAACATTGGTCACT[G/A]GACGTGGCACTGGTCACTCAATGCGAAAATGGTCATTGGACGCGACATGGATAGTGGACA	Y	C	0.915	0.70455	N
BARC_1.01_Gm01_17412745_T_C	Gm01	17412745	T	C	TTTATATATTAACATGGTTTCAGTTAAATTATTCATCTCTATCATTTAAGATAAAATTTT[T/C]TGCTTGCTTTTATAAATATTCATTCATATGTGTTTTCGTTCATATATAATTTTTTTAAAT	Y	D	0.596	0.39932	N
BARC_1.01_Gm01_17471915_G_T	Gm01	17471915	G	T	GCTAGCAGTAGGGGTGCAGGCAACTTTGCAGGACGTGCAGGATGCAGTGCAGCTGATTTT[G/T]TTGACTTTTTGGGCTTAGGGGAGAGTTGCCATTTGGTCTGACGACTTAGGCCATGGAAAT	Y	B	0.673	0.55859	Y		0.427	0.479	0.452128	0.029	0.375
BARC_1.01_Gm01_17646229_A_G	Gm01	17646229	A	G	AAGCCATATATTCTACCTTTGTTGTTGACAAGGCATCTATAGGCTAAAGTGTAGCCTTCC[A/G]ACTAACAAGAGAATTGCCAATTGTGAAAGCATAACGTGTCATATATCTCCTTGCATCTAA	Y	C	1	0.77	N
BARC_1.01_Gm01_17671586_G_A	Gm01	17671586	G	A	ATCATCAAAGCGTGATCCATCTTACTGAGAGTATATTAATGTAAATCATGTGCTAAGCGT[G/A]AAGTCAGCATGAAAAGTAAGCTATGGGGGGCCTATATAAGGAAGAGGAAGCAGAAGGGGA	N	C	1	0.77	Unknown
BARC_1.01_Gm01_17730640_A_C	Gm01	17730640	A	C	AGATCAAGGGATTCACACGCCCATTAGGCACTAAGCACGTTTGTACGCTAAGCGCAAACA[A/C]CATTAAAGCAACTTTAACTGTCAAGCTAAGCGCGTGACTCATAACTGCTGGAAGTTGAAA	Y	C	0.839	0.64603	Y		0.156	0	0.078125	0.112	0.35
BARC_1.01_Gm01_17760029_A_G	Gm01	17760029	A	G	CATTGAGGTATTTCACCGAGCACTTGGTGGGCGCACCTTAAGTATGGGGGAAAAAAAAGA[A/G]TGGGGGCAATGTGATGTGCCCAACAATTTCAGAACCCACATTAGGCCTAAGGCCATCCCC	N	C	0.434	0.33418	Unknown
BARC_1.01_Gm01_17892281_A_G	Gm01	17892281	A	G	TTTAGCATTCATAAGGTCAATTTTCTCCCTCCTTGTGGCTGAGTATGAAGTCACAGCAAG[A/G]GAAGAGGTGGGCCCCTTTTGCTCCACTCAAAATGAGACATGTGGCATAGCTTTTAGAAAA	Y	C	0.436	0.33572	N
BARC_1.01_Gm01_18077294_C_T	Gm01	18077294	C	T	CTTTTTAACTCTCAATAATCACTGTTTGGAATCTTATCCCATCCCCACAAGTAACGATCC[C/T]TACCCACTGACCCACGTCCATGTTATGATGGCTCTATTTAGTATTTATAAGATGTGACGT	Y	C	0.889	0.68453	N
BARC_1.01_Gm01_18156628_T_G	Gm01	18156628	T	G	GAACCCATAGTCTTTACTCCACTGCCTGATGGCCCCTTTCAAATATTTGAGCTTATTTTT[T/G]AGCACAACTCCCCCCATCCCCCCTGCTGGGCAGTGTTCCAAGCCTCCCTCACTGCTCTGT	N	C	0.414	0.31878	Unknown
BARC_1.01_Gm01_18201508_T_C	Gm01	18201508	T	C	AAAAAAAGACACTGGGGCTTGGCGACACAGGAGTGCCGCTTAGCGGAAGTTGCAAAATTT[T/C]AGTTTCTGCAAAATTGGCTTAGCTCGCAAGGAGCCCGCTAAGCCTAAAATCTGCTGCATG	Y	B	0.436	0.36188	Y		0.2	0.489	0.343915	0	0.231
BARC_1.01_Gm01_18315073_T_C	Gm01	18315073	T	C	AAACATTAGACAGTTGAAATATCAAAGTCCTGAAGGCTACTGGTGTATAGTTGGAGATTT[T/C]AATAATATTAGGAATGCTGCAGATAGAATGGGTTCAAGTCAAAGGGGGCTGCATGAGGGA	Y	B	0.9	0.747	Y					0.166	0.166
BARC_1.01_Gm01_18346739_C_T	Gm01	18346739	C	T	AATAAGGATGACAACACCTATGCAGGAAAAGCCAATGGAACAGAGATGAAGATTATGGAG[C/T]GTAGGGAACTTGAAAATAGAAGATACGAATCTATCTCCTTCCCCCGGCTCAAATCATACG	Y	A	1	1	N
BARC_1.01_Gm01_18372588_T_C	Gm01	18372588	T	C	ACTCATATAAAGGAGAAAAGGTGTGATTGTTGGAAATGATCAGGAAGGAGATGATTCTGT[T/C]ATTACTGCTCATGTAAGTACCTAACTAATCTCTTAAAAGTATTTTAATTTTTAACGACTT	Y	A	0.9	0.9	N	CDS
BARC_1.01_Gm01_18424210_C_T	Gm01	18424210	C	T	TAGCTGAAATAGGATTGTGTGAAAAATTATTGAGGCTGAAGCTCCTGTATATGACTATGT[C/T]GACAAGTGATTGTTTGGATCAGACGATCCATCATACAATTCCTAAACTATTTTGGAATCT	Y	A	0.868	0.868	Y		0	0		0.168	0.056
BARC_1.01_Gm01_18474039_G_T	Gm01	18474039	G	T	TATGCATTGTTAAAAAGGATCTGTCGTTCACTAACGTCACAAATATTTTTGGTACGAGTG[G/T]CATGACTCGTAGTGGATGGATCTTTGTTGCGCCAAAGCTATCAATATGGTCGAAGGACAA	Y	C	0.741	0.57057	N
BARC_1.01_Gm01_18519371_A_G	Gm01	18519371	A	G	TAAGGAATGCTCAGAATTAGAAAAGATTAAGCAACCATGTACTTGAATCTCGTGGCAGTA[A/G]TGATGAACCCCAACTCGCAGACGAGGAGACACCAAACGACCTGGGGTGATGAGGAGACAA	Y	C	0.701	0.53977	N
BARC_1.01_Gm01_18553107_G_A	Gm01	18553107	G	A	TAAACATGAATATTTATATAAAAGAACCATGAGGTGTTGAGAAATTCGCCTAGGCGAGCC[G/A]TAGCTCATCTAGATGAACTTATGACTTAGTGCTAAAGGCACCAATTCGCCCAGCGAGCTG	Y	C	0.63	0.4851	Y		0	0.005	0.002	0	0.003
BARC_1.01_Gm01_18697162_G_A	Gm01	18697162	G	A	TGTCAATAAACGAAGCCCATTCCCCTTGATCTGCCAATGTCTTCGCCTTTTCCTCCAAAC[G/A]CTTCCTTGGTATTTTGACTAACCCGTTCCTATTTTGCTTCACATGGTCCAACTCTTGTAC	Y	C	0.5	0.385	N
BARC_1.01_Gm01_18736009_C_T	Gm01	18736009	C	T	AGCGAATGAAGGATAGGATCGTGACCAACCAAGCGCCACCCCTTCTCGGCGCTAAACAAG[C/T]AGAGAACATCACTGTAGGGCAGCCCAGTATCCTTTGCGTTCGCATTTTCTTTTACTATTG	N	B	0.434	0.36022	Unknown
BARC_1.01_Gm01_18822456_C_T	Gm01	18822456	C	T	AGAATGACACTCAGACTTAGTGCACAGGGCGCACTTAGCCTAATTACAAAAACTAAAAAA[C/T]AGTGAGAAAGTTGAGCTTAGCGCAGCAGGGCGCGCTTAGCTCGACCTCCTCGACACACAA	Y	B	0.446	0.37018	N
BARC_1.01_Gm01_18915610_T_C	Gm01	18915610	T	C	CAGCCACAGTGCCTATTTCGGGATAAGAGCCTTGGAAGCAGCAAAGAGGAGCAGCTTCTA[T/C]AGAGAGGCCTAGGTTTTTTCATTTGAGAGAGATTATTGAGTAGAGAGTGAGTGTGATATG	Y	D	0.431	0.28877	Y		0.095	0.242	0.168421	0	0.112
BARC_1.01_Gm01_18974543_C_T	Gm01	18974543	C	T	TCGCCACCACCCACCCTTTCAAATACATGACGAAGACAGGGTGGTGGAGAGGGGCTTAAA[C/T]GACTTTGTTTGATGGAGGGGTGGGGTGAGCTGACAAAACGACTCTATTTGACTAGATCTC	Y	C	0.996	0.76692	Y		0.042	0	0.0208333	0.133	0.058
BARC_1.01_Gm01_18998213_A_G	Gm01	18998213	A	G	GAGTTAAGCTACAGCGAGTTTGGCAATGACGGCCTCGAGGTGGTCCAGGCAGTTTAAGGA[A/G]GGTTTGTCGTCCACCGTTGGAGCTCAATGAAAGCACCAATGTTATGAACGCAAGAACAAG	Y	B	0.511	0.42413	N
BARC_1.01_Gm01_19078782_A_C	Gm01	19078782	A	C	GAGGTAGCTCTATCCTATGCTCATGTTAGCACAAAGGGAAGCTATGTTGATCCCTTGGGG[A/C]AGGACCCGGACACTGATGCATTAGATAGGCGTGGGTTGTATGTTGATGACAATCCTCCCT	N	C	0.569	0.43813	Unknown
BARC_1.01_Gm01_19121768_A_G	Gm01	19121768	A	G	CCTGGTAGGAGATTTGTTCTGAATGCTGAGGGCCTGCTGCTGAATCCCGGCAAGTGCACC[A/G]AATCGCGCAAGTAGTATAAAATGGTAAGAACCAAGTATCGAAGTCTTGGGGAACTTGTTT	Y	C	0.504	0.38808	Y		0.042	0	0.0208333	0.052	0.33
BARC_1.01_Gm01_19181296_T_C	Gm01	19181296	T	C	AGTCCTCACCTTTAGAGGGCTACACTCCCTTGCCATCAAAGGACTACGCGTCCTCGTCTT[T/C]AGAGGGCTACGCGCCCTCGCTTTCGTTGGATTACACGTCCTCAACTTCAGAGGACTACAC	Y	C	0.414	0.31878	Y		0.042	0	0.0209424	0.061	0.328
BARC_1.01_Gm01_19222371_A_G	Gm01	19222371	A	G	GCAACAGCTCGTGTGGGCGAGTTGCTGATCAACCTTCTTCCCTCATTTCTTTATATAGGC[A/G]TGAGGGGGCTGAAGGAAAGGGTTCAAAATTTCAACATTGGAAGGATTTAGTGAAATTAAG	Y	C	0.642	0.49434	Y		0	0		0.179	0.272
BARC_1.01_Gm01_19272266_T_G	Gm01	19272266	T	G	CCAAGTGGTACAACTCGAATGCCAAGTGTGCATACCATAGTGGAGCCCCCGGACACAACA[T/G]TGACTCCTGCTTGCCGTTCAAGTATAAGGTGCAACACCTAATAAATGCTGGCTGGCTATC	Y	C	0.436	0.33572	N
BARC_1.01_Gm01_19295207_C_T	Gm01	19295207	C	T	ACATTAGAGAATGTTATTGACCCACTTTTGGAGCACCTTGCTTAGTGGAAGCATAATGCT[C/T]ACACTAGATCAATGGGTATTAGGTTTATACTCAATTGGAACTAGTGCTAGTGGGATATTG	N	B	0.772	0.64076	Unknown
BARC_1.01_Gm01_19378972_T_G	Gm01	19378972	T	G	CTCTCTTCGATGAGATCGAGTTTCTCCTTTCCTTCCGCCACCAGGGGCGGCCCTCCCCCA[T/G]TCAGAAGCATTTGCTGTGTTGGGTGGGTTTGAGGCAGTGCGTAGGGTGTCGGCCCCTCAA	Y	C	0.703	0.54131	Y		0.042	0	0.0208333	0.166	0.292
BARC_1.01_Gm01_19421513_A_G	Gm01	19421513	A	G	TTACCTTTGAGGGTCAGCAACCCCAGCCTGTAGGAGGCGCCCGTGAAGAGCCACGGGAGC[A/G]TGCTCAAGGGGACTTTGACCCATATTTCATTTTCACCGTCGAGGGACTGGTGTGTAATGC	N	C	0.976	0.75152	Unknown
BARC_1.01_Gm01_19507856_G_T	Gm01	19507856	G	T	TGAAAGTGATAAATTGCAGACGCATGAGGAAAATTTAATTCCATTTGTACCTGATGATGC[G/T]TTTGCTTTCTTTGCTTTAGCCATAACAATTCTAGAAAGTTTAGAAAGCATTGTAGTAAAC	N	D	0.858	0.57486	Unknown
BARC_1.01_Gm01_19665961_G_T	Gm01	19665961	G	T	GGCAATTAGCAGCATGGGGTCTTATTAATATTAATTATTAGTTTTTCAGCAAGGCAATCG[G/T]CATTATGATTCCTTGAATTGGGTTAAGCACTAATGGTTGATGAAATTATAAACTATGTTC	Y	B	0.629	0.52207	N
BARC_1.01_Gm01_19797561_T_C	Gm01	19797561	T	C	ATACTAATGTTAAATAAACATCTAAAAATGTCTTACACATTTTGTGTCATCAATTTAGTT[T/C]TAATTTTTTATAATTACTATTAGAACATCTAAAAGTATAATTAATTTAATAGTATTACAT	Y	A	0.596	0.596	N	Intron
BARC_1.01_Gm01_19848591_C_T	Gm01	19848591	C	T	GGAAGAAGTTTGGCAGGTTCTTCCACGAGAAGGATTGAAAGCTTGCAGAAGAAGGTTCCA[C/T]AGGTTCTTCTGCGAGAATAAAATGGAGCCAGCGGAAGAAGGTGTTCTTCCGCGGGCTCCT	Y	C	0.64	0.4928	N
BARC_1.01_Gm01_19895387_C_T	Gm01	19895387	C	T	AAGAACTACGTAGGTCTGAGTTCCTCATCATAAATTGAGGATACGTAGGAGCAAAAGCCT[C/T]ACTTTTTCCGACCGCCCCACCTTTTGCTATCATGACCCAAGAGTCTGGTAGCACACGGAG	Y	C	0.426	0.32802	Y					0.089	0.089
BARC_1.01_Gm01_19942022_G_A	Gm01	19942022	G	A	ATGAATGCAATTGCATCAAATGCTCATCAAGGAAGTCATTCCTAATAAGGAGGGAGTCAC[G/A]TCCCTCAATCCTGCTCAAATGACCAGCCACCAAGTTTTCTGCTCCATTCTTGTCTCTGCT	Y	C	0.561	0.43197	Y		0.13	0.495	0.308511	0	0.208
BARC_1.01_Gm01_20025984_G_A	Gm01	20025984	G	A	GAGGTGACCCACATGGTCCGCCATGGTTTTACTATAGACCAACACATCATCGAAGAAGAC[G/A]ATGATGAATCTGCGTAAGCAGGGCTGAAAGAGCTGATTCATAGTAGCTTGAAAGGTTGAT	N	B	0.719	0.59677	Unknown
BARC_1.01_Gm01_20199816_C_T	Gm01	20199816	C	T	TAATTTCAAGTGATCTCGAATTACCAGGAGGGCTGAACATTTTTCCCTTCACCTCTCCCC[C/T]TATTTATAGGAAAATAGGGGAGAAGCTTGCCACCCAGCTTGCCCAGGTGAGCTAGATTGC	Y	B	0.426	0.35358	N
BARC_1.01_Gm01_20282028_T_C	Gm01	20282028	T	C	TGCGTCACCGTCTCCACGAGAGGAGGCACCGTCTCTAAGGTCCCTCTCTAATCGCCTGGA[T/C]AGGATAAAGCTCCGAATGGACAGGTATATGAGTCATGTGATTAGACAGCAGGCATCTAAT	N	C	0.742	0.57134	Unknown
BARC_1.01_Gm01_20468974_C_T	Gm01	20468974	C	T	TCTGAGGATTCCGCTCCGATTAAAACATTCCTCTAGGTGTGGTGGTTCCGCAGCAAGCAA[C/T]GGCGGCTCATGGTGGCCACCAGTGGTTGTGGGTGGTGGAGAAGAAGGTGTTAGGGTTTGT	Y	B	0.414	0.34362	Y		0.111	0.489	0.304348	0	0.202
BARC_1.01_Gm01_20498383_T_G	Gm01	20498383	T	G	GGCCTGGCCCATCAAGAGAGCCATTTCGTTCTCAGCTACAAGGATTTCATAAATTTGCCA[T/G]ATCGTGAGCTTCTGCATCAACAACAAAAGGGGTTGTGTTACCGATGTGGTGGGGTGTTCC	Y	B	1	0.83	Y	Intron	0.13	0.489	0.304813	0	0.207
BARC_1.01_Gm01_20542501_C_T	Gm01	20542501	C	T	CTCCCCCACAAAACTCATTTCCCACACAATCTCTTCCCACCGAAATCACCAATCCCAGTG[C/T]AAGCACCAATCTGAGAAGGAATTTTCCAGCAAAGAAGCCTGTAAAATTCACCCCGATACC	Y	C	0.768	0.59136	Y	CDS	0.13	0.495	0.31383	0	0.212
BARC_1.01_Gm01_20668269_C_A	Gm01	20668269	C	A	CTTGTGAAATAGTTAAGACGAAGTTTTTCATAAAGGACCCTTGAAGGATGTATAGATTTC[C/A]TTGCTTGGTCCCCTGCATTACCATAAACTTCCCTTTCCCTCTGATTTTCATAACTCTATC	Y	C	0.718	0.55286	N
BARC_1.01_Gm01_20713958_T_G	Gm01	20713958	T	G	CGTCGCTGGAGCGCTGCAGCTCTCGGCTGGCCGATTCGAAAGGCGATTGCACGGCGGCGG[T/G]GAAGGTGGTGCCGTCGATGGAAGCAGTGGTGAAGGTCTTCTGCGTCCACACGGAACCGAA	Y	B	0.75	0.6225	N	CDS
BARC_1.01_Gm01_20797029_C_T	Gm01	20797029	C	T	ACAGACACAGGTTCCGAAGTACAGAACACCAGCCGCGATTTGAGACTATCAAAGGCCGGT[C/T]GTTCCTCAGAGAGAGACGTGCCCAGCTGAGGGACGATGAGTTTGCTAAGTTCTAGGAGAA	Y	C	0.949	0.73073	Y					0.01	0.01
BARC_1.01_Gm01_20838452_C_A	Gm01	20838452	C	A	CCTGCACCCAAATTATAAAAACGAGGGAGGGGAATGTTTTGGCATCCAAAAACTCCCCCC[C/A]CCCCCTCATTCAAAGGAAAGAACACAAAGGCTTGCGGTTCTTGCTCCCTCAAGCCACTTT	N	C	0.414	0.31878	Unknown
BARC_1.01_Gm01_20994622_C_T	Gm01	20994622	C	T	TGAGGGTTCCAAAAGAAGGCGTTGCCTTCTGGTGGAAGCAACCCTGCTCGCCTAGGTGAG[C/T]TGAGCGGCAGCCACCTCCCTCTTATCTCCAATAAATAGGGGAAAGAAGGCAGAGCAAAAT	Y	C	0.414	0.31878	Y		0	0		0.008	0.003
BARC_1.01_Gm01_21073672_G_A	Gm01	21073672	G	A	ACTCGGTTCTTACCGTTTTAGACTACTTACACGATCCGGTGCACTTGCCGGAAGCGAATA[G/A]CGGATCAATTCGCCCAGGCAAGTTGTAGCTTGCCTAAACGAGTTGTTACTTAGTGCTGAA	Y	C	0.528	0.40656	Y		0	0		0.025	0.008
BARC_1.01_Gm01_21125014_A_C	Gm01	21125014	A	C	GGCCCCCCCAAAGTGTTTAGCAGGGGTACGCCACCAAATGCTTGCCCCTCGGTGGCATAT[A/C]TGAGGTGAGCTCGAAGTCGGCTAGTGTGGTCTCGAGGTACTTCATGTATCTCTCCCATGG	Y	C	0.546	0.42042	Y		0.042	0	0.0208333	0.112	0.312
BARC_1.01_Gm01_21208962_C_T	Gm01	21208962	C	T	GGTCAGGCATCGCAATAGCCAGAGGAGGACTAGTAGTAGCCAGCTGCAGATGCACCGCCG[C/T]CGCCCTTGTAAGAGACACCATCCCCGGGGTCTATCTATACCCACTTGCAGAGGATAGAAC	Y	B	0.738	0.61254	N
BARC_1.01_Gm01_21273405_A_G	Gm01	21273405	A	G	CAACTATCTTCTCCAACTCCGGGGGAAGTCCCACACCTTCGTTTTCTTCATCCCTCGTCT[A/G]ATCCTTCTCTTGCTCGAAATTGATGGTCGGGTCCCAGGTATTAGTAGCTTCGAGGGACTC	Y	C	0.436	0.33572	Y		0.042	0	0.0208333	0.082	0.317
BARC_1.01_Gm01_21332492_C_T	Gm01	21332492	C	T	TTTCCTCCTTTGGAAAGCGCACCCGTGAGCCTCGCCTCGCTCGCCCGCAAAAGGGCATGC[C/T]GCGACAGGGTCTTATTAAAGCCCTATTTAAAATGTAGCATGCAGTGTTAACGGCTTCAGC	N	C	0.431	0.33187	Unknown
BARC_1.01_Gm01_21494860_G_T	Gm01	21494860	G	T	ACACACACCCTCCGTCCACAAACACATTGGGAAAGAAATTGCAATAGTTCAAGAACCCCT[G/T]CATCCCTATTAATTATTATGGAAGCTACGTGTCACCAATTTTAATTTCTACTTCTAGTTT	Y	B	1	0.83	Y		0	0.245	0.120419	0	0.082
BARC_1.01_Gm01_21555837_T_G	Gm01	21555837	T	G	AAATTGTTTGTAGGCATGCCTTGAAGCCAATAAGTTTATGTGGTGTTTGAATAGTGGTTG[T/G]TCAAGGCATATGATGGGAGACAAGAACAAGTTTGTCTCTTTGAAAGAAAAAGAGGGAGGC	Y	B	0.842	0.69886	N
BARC_1.01_Gm01_21804377_G_T	Gm01	21804377	G	T	GGCCAGGCGACCTGCTGAATAAAGGCCTCTAGAGTTGTGAGCAGCGGGTCCATCTACAGA[G/T]GAAGGGATAGTTGATGCAAGTCTAGCATAATAATCTGCTATCCTTGGTATAAGGACTAAA	Y	B	0.988	0.82004	Y		0.474	0.468	0.497354	0.018	0.339
BARC_1.01_Gm01_21861186_T_G	Gm01	21861186	T	G	AAGAAGCATAGCCGTTCAATTGAGTGAAAAGAGTTGGTTTGCATTTTTATCTAAAGATTT[T/G]AAGACTCTGTCACTTGGCGACGACCATGGTACATTCAACATGCCCGTGGTAAGCAGTACA	Y	C	0.809	0.62293	Y		0.068	0.005	0.031746	0.074	0.334
BARC_1.01_Gm01_21883574_G_A	Gm01	21883574	G	A	AAAAAATTCGATGGTGGTGGGTACAATTGAATATGGTCATTTTAAACCCTATTATCACTG[G/A]GCACTTTTTCAACTATTTTCTACCGAGAACTGAGAAAAGTCACTGTTTCTTGTCTTGTCA	Y	A	0.812	0.812	Y		0.474	0.484	0.494737	0.021	0.345
BARC_1.01_Gm01_21939103_A_G	Gm01	21939103	A	G	TATAACTGCCTAAGGTAGTGGATGCTACAACCAACTAGTGCTTTATGCTTTGGCACTTCA[A/G]ATGTACTCCTTGAAGGTAATTGGGCTTCTTTGTTATTCTCTTTGGCCTGTTAATGTGAGT	Y	A	0.768	0.768	Y		0.266	0.453	0.357895	0.5	0.406
BARC_1.01_Gm01_22006746_C_T	Gm01	22006746	C	T	TAACCGAGACTGTTGCAGTCTCCCCTTTGTCAACCAGAGGCAAGCAAGCCAGTTGACATG[C/T]GGAGACAAGTTTGGTCATCCACACCCTTTGCTATCCAGAGACAATCGAGTTCGATAGCAT	Y	C	0.434	0.33418	N
BARC_1.01_Gm01_22164577_C_T	Gm01	22164577	C	T	ACCAGCTCGCCTGGGCGAGCAAGTTACTTCAGAAGGAAGGAAGCAACTCGCCCAGGCGAG[C/T]TGCTATGCAGCCTCCACCCCTTATTTCTTATAAGTACACATGAGGAGGGCTGAAGGAAGG	N	C	0.716	0.55132	Unknown
BARC_1.01_Gm01_22281890_A_G	Gm01	22281890	A	G	ATTTCGTTTCCCTATAGAAGCGACAAGGCGGTGCCATGGAGGTACGCCACACAAGGGTCC[A/G]ATGAAAGGAAGGACGCGTCCATCGTATGTACTAAAGATGATCAATCCACCGCCAAGGTAA	Y	C	0.9	0.693	Y		0	0.247	0.121693	0.422	0.223
BARC_1.01_Gm01_22374129_A_G	Gm01	22374129	A	G	ACTTCGGCAGGGGGAAGGTTTGAGTTATGGTCGTTGGGGAGAATGTTGCTAAGCAACAAC[A/G]TCATCCAGATCTACATGATGGTGGTCATGCTGGTGCGCATGATCCGAACCCGTCTCCCCG	N	C	0.414	0.31878	Unknown
BARC_1.01_Gm01_22402816_G_A	Gm01	22402816	G	A	GATTGCTCTTGAGGAACTTCATCGTCGATCATGGTGATTCGCCCTTCACGCATCCAGCCC[G/A]TGCTGGTGAAGCTTTCATTGATATGACCTAAGGGAGTCCCTCCCGCTTGTGGTCCTTGCT	Y	A	0.673	0.673	Y		0.344	0.484	0.429319	0.063	0.308
BARC_1.01_Gm01_22478605_A_G	Gm01	22478605	A	G	GTAGAACGCACGGCCAAGACCTCGACGAACGTAACACCACTGTCAAGGAAGTGCAGAACT[A/G]TGTTGACGGTGGCTTCGGTGGTTGTGGGGGACATGGTGGTGGGTGTGGCGGCGGGCGTCA	N	C	0.824	0.63448	Unknown
BARC_1.01_Gm01_22505746_A_G	Gm01	22505746	A	G	CTGGATCGCTTAGCGCGCATTAGTGGATTTCGACTTAGCGTGTGCTTTTCTTGCTCGGCG[A/G]ATGGACTGAAGCAGTACACTTAGCTGGATGACCCTTTGCTCAACGAACATGCATAGCTCA	Y	A	0.468	0.468	Y		0.063	0.005	0.0314136	0.063	0.336
BARC_1.01_Gm01_22786770_C_A	Gm01	22786770	C	A	CGAACTAGTGGACTAATTGACTCGCATGATCCAACATATTTTCTCCCTTGGGCGTGACCC[C/A]AACCCGAGTCAGTGGGTCATCGGTTTAACCGTAAACCCAAATGGTCATATCGGATTGCAC	Y	B	0.8	0.664	Y					0.01	0.01
BARC_1.01_Gm01_22900040_A_G	Gm01	22900040	A	G	ACTCCACCAAGTATAAGAAAAATTTGGACCCCTTTGTTCTTGGACCCCTTTGTTCGCACC[A/G]ACATATGCATGCCCAAGTATAAGAATAGTTTTTTCTTCATTGCTTAAATGGCCAACATAT	Y	C	0.9	0.693	Y		0.068	0	0.0314136	0.363	0.22
BARC_1.01_Gm01_23011802_T_C	Gm01	23011802	T	C	TTTCAAATGAGGAAGAGGCTGAAACCCCTAAGGAGAGTGAGGATGTGCAAGCCTTAAAGG[T/C]GGAGCTTGAAAGGGCACAAGCAGTCAAGGAAAAATGCATGACAACAACCATCAAGGTCTG	Y	C	0.483	0.37191	N
BARC_1.01_Gm01_23035063_T_C	Gm01	23035063	T	C	ACGTCTTGTGTCTTTTATTGAACTCAATGTCCTTATCTTTGTGCTTGTTAGGACTCAATG[T/C]CCTCTATTTCTATGCTTTGAAAAAAAAACTTCAAATGTCTTATGGTCTATAGGACTTTAA	Y	C	0.408	0.31416	N
BARC_1.01_Gm01_23167662_C_T	Gm01	23167662	C	T	GTGTCTATTGGCTTCTTGTGTCCAGAACCATGTTGAAGGTTTAAAAAAAAAAGTTGGACA[C/T]GGTGAATGCGTGTCCAACATGTGTCCGTGTGTGTTCGGCACATGTTCATGTCGTCAATGT	Y	B	0.949	0.78767	Y		0	0		0.362	0.121
BARC_1.01_Gm01_23249191_C_T	Gm01	23249191	C	T	TATATATATATATATATATATATATATATATATATATATATATTGTCCCATATATTATAA[C/T]AGATTCATTTGCCAATCATAGAATAGAAATACAAAAGAATTGCATTATACAAGATTATAT	N	C	0.523	0.40271	Unknown
BARC_1.01_Gm01_23352859_A_G	Gm01	23352859	A	G	TGCCTGTCCGATGCAGCAGTAATGATGGCCCGAGTTATGTTGGGAATGGTTACGAACCCG[A/G]AATGGGTTTAGGCAAAGACAACGGCGGCATAACTAGTCTGATAAATGCCAAAGGAAATCA	Y	C	0.426	0.32802	N
BARC_1.01_Gm01_23402959_C_T	Gm01	23402959	C	T	GTGTCTGAATCCATAGAGTTTTGAGAGATTTTTTTGTGCAAAGACCTGCAAAGAATGGAG[C/T]TTGAAGAGGAAGTCGTCCCGAGAGCTTGAGATGAGTTTGTGAGTGGTTGTGAGGTCCTAG	Y	C	0.434	0.33418	N
BARC_1.01_Gm01_23454354_A_G	Gm01	23454354	A	G	CTATAGTAGACTTGGGCCTGCGTGCTTGTATTTGTGCTTAGCGCATGTTGCTCACTTAAC[A/G]CGAGTGTCTCTATTCATGCTTAGCGCGCCTCTTCCTCGCTTAGTGCCAATGCTTATTTTT	Y	C	0.781	0.60137	Y		0.068	0	0.0314136	0.385	0.229
BARC_1.01_Gm01_23506127_C_A	Gm01	23506127	C	A	GATAGCTTCTATTAGTATACACTGCATCTGCAGCGCCAAGACCCCTACCCTTACTCATGG[C/A]CTACTCCCAAGCAGTTCAGAGCCACTGTCACATGGTCTGGGGACAGGCCTATTGGATCGA	Y	C	0.822	0.63294	Y		0	0		0.382	0.126
BARC_1.01_Gm01_23586582_C_A	Gm01	23586582	C	A	AGGCAACATTGGTGTTGTCACCATTCACAACCATTGATAATGTAGTGGTCAAAGGAGAAG[C/A]TTGCCTTCAGACCCCACAGTAGGCACCAAATATTCTTACCGGATTTGGCAGAACTTGCTC	Y	C	0.897	0.69069	Y		0.411	0.484	0.463158	0.021	0.366
BARC_1.01_Gm01_23715456_G_A	Gm01	23715456	G	A	CTACACATCCTCGGCATAAAAGGGTCGCGTACCCTAACCTTCAGAGGGATGCACGCAGTC[G/A]CCGTCAGACGACTACACGTCCTCGTCTTTAGAGGGCTGCTCGCCCTCCCCTTCAAAGGAC	Y	C	0.492	0.37884	Y		0.337	0.49	0.42328	0.024	0.294
BARC_1.01_Gm01_23743830_A_C	Gm01	23743830	A	C	AACATAAAAAGGGGGTGAGGGGTGAACTTTCTTCACCCCAACATCTTCCCCCCCCCCCCC[A/C]CACACACACATTCAAACACACGCCAAGGCTATGGAATCCACAAAAACCAGCAGCCCTAGT	Y	C	1	0.77	Y		0.068	0	0.0314136	0.406	0.213
BARC_1.01_Gm01_23802089_T_C	Gm01	23802089	T	C	GCAATGATATTTGATTGTACCCAAAGTAGCATCCACGAACCCTCCTGCTATGACATGTAT[T/C]ACCTCGTGCTCTCGATGAGGGAAATTTGGTCTTCTGTCAGGAGAATCCAACTTATGTTTC	Y	D	1	0.67	Y	Intron	0	0.245	0.120419	0	0.082
BARC_1.01_Gm01_23833208_G_A	Gm01	23833208	G	A	GTCGAGCCTCCATGACTGGCGAGTGGATTAGTCCTCACATTCGGACTGTCCTTTTGAAAT[G/A]TCAGCCATCCTGCATCATCAATCTTTGTACCATGTGCTTAAAGGCCACACACTGTTCTAT	Y	C	0.63	0.4851	N
BARC_1.01_Gm01_23889360_C_T	Gm01	23889360	C	T	TTAGATTTGTACCTGACTTACAATCTTTAAGTCATTCATCATGTATTGGGTTGTGAGCCA[C/T]ATGTTCGTGACATGTGAAGTTGATGTACCCCGAAACAGTTGCCCCTGATTTGATATTGTC	Y	C	1	0.77	Y		0	0		0.226	0.074
BARC_1.01_Gm01_23911633_C_T	Gm01	23911633	C	T	GGGTCCCACCGTGGGAAAGACCCTGCGCGTGGAATCTGGTGGCGTCCAGAAGGTCTACGT[C/T]AGAGATGACGGGCGTTACGGCGTGACGGTCGGGGATATGAGAAAGGTCAGCACGCCGTTA	Y	C	0.75	0.5775	Y	CDS	0	0		0.021	0.007
BARC_1.01_Gm01_24009860_A_G	Gm01	24009860	A	G	CACGCGTCGCCCTCCCACCGAAGGGTAGGTTGCGACAAGAACGTACAACTCTGCTCCCAT[A/G]CCCATTGAGAGCCAACATTCCCAATCTGGTCATGCACATGCCTCTCAATCCATGGGGAAG	N	C	0.426	0.32802	Unknown
BARC_1.01_Gm01_24066141_A_G	Gm01	24066141	A	G	ACTCCAGGACTACCTCAGGGTCAAACTTAGTCATGGGAGTCACCAGCGACGTCTAATGTC[A/G]GCGGGCTATCCACTCCTGAAAATATGTGTACTCATCCTCCCTGAGCTGGACGCGCCTCTC	Y	C	0.414	0.31878	Y		0.068	0	0.0314136	0.388	0.222
BARC_1.01_Gm01_24325590_T_C	Gm01	24325590	T	C	ATTGAGAACACCTTGGTAATTCATAGCTTGCTTTACTTCAGGCCGTAATCCATTAAGAAA[T/C]TTGACACATTTGGAACTTTCACTATCTCTCCCTTGATAATGGGGAAAGTACCTCACCAGC	Y	C	0.431	0.33187	Y		0.068	0	0.0314136	0.065	0.34
BARC_1.01_Gm01_24427806_A_G	Gm01	24427806	A	G	AAAGATCCAACCTCCATAGAAGCCCCACAAGCAAGCTTCCATCACTTGGGAGGAATGAAA[A/G]AAGTTATGAAAGAAGACATAAAAGGAATAAGGGTGATGAAAGAGGAGGAGACTTAAGAGG	N	B	0.965	0.80095	Unknown
BARC_1.01_Gm01_24509618_T_C	Gm01	24509618	T	C	GAACCCTGCACACTATGTCTAGCACTACAGCTATCTAGTCCTACTCTATCAAGTTCCTAA[T/C]AGCACACACCAATGGGTGATCAAACCACAAGCATGCATACAATAAGCTTAGATAGAAACA	Y	C	0.436	0.33572	Y		0.085	0	0.0421053	0.073	0.339
BARC_1.01_Gm01_24589097_T_C	Gm01	24589097	T	C	CCCAAACCATGTCACTACAGGTGGAGAAGAACGACGAGAGGGTTTTTGGAGGAGGGCGTG[T/C]TGGAAAAACACGCCACATGCCAAATCAAGTGGTGGCACATGAGCTTCACACACCGGAGTA	Y	C	0.996	0.76692	Y		0.094	0	0.0421053	0.386	0.231
BARC_1.01_Gm01_24694684_G_A	Gm01	24694684	G	A	AGAGGCATTTGGGGAGCTGAGGAGGAGGCTTACCACCTCTCCCATCATGCAGCCAATTAC[G/A]CACTTGTGGATGTTTTGTCGCAAAGAATTGATAGACTACACATATTTTCCAAAGTTAAGA	Y	C	0.694	0.53438	Y		0	0		0.011	0.004
BARC_1.01_Gm01_24730406_C_A	Gm01	24730406	C	A	GGGCGCAGAATGACCATAATTTGTCTCTGCGTGCTATCAGGCTTTTCGTCTTACAGATAG[C/A]AAAAAAAGAATTTATACGGATAGCCACTCGGGTATCTCCGCATGTCACGTGACTCCAATG	Y	C	0.436	0.33572	N
BARC_1.01_Gm01_24763604_T_C	Gm01	24763604	T	C	AACTCGGCCTCACCCGGCCAACAATACCCACCTTGGCGCAGGCTCCAACATGACGAGGAA[T/C]TTTTCGCCAAGGCAGGCTCATATTTTCACCCCGATCCCAATGACGTGTGGGGAGCCCCGG	Y	B	0.462	0.38346	Y		0.084	0	0.0418848	0	0.362
BARC_1.01_Gm01_24794211_T_C	Gm01	24794211	T	C	CCCCCCTTTCTTAATTATTCTGAGGCCACTTGATCCAACAGCAATGTCCTTTCCTATTTT[T/C]AGGTGCTTGGGGACAGGTACGAGTAGACGCTAGGCCTGCGATCAGCATGTCGTCGCCCCG	Y	A	0.516	0.516	Y		0.193	0.443	0.315789	0	0.214
BARC_1.01_Gm01_24939925_G_A	Gm01	24939925	G	A	GTCAAATGTTCTTACCAAAATTCGAAACCTGGACATGTCAGGGTTGACGCGACGAATGTG[G/A]GGTCCCAAACCTTACACGTTGGCTTTGAGGCTAGCCTTTGTTGAGAGAACAAGAGGGGGG	Y	B	0.976	0.81008	N
BARC_1.01_Gm01_25006612_A_G	Gm01	25006612	A	G	TTTACGGAAGCCGTTGTATCCCTCGCCCAATACTATGACCAGCCGTTGAGATACTTCACG[A/G]TTGGGGACTTCCATATAGTACCGACTGTTGAAGAATTTGAGGAGATTCTAGGATGCCCTC	Y	C	0.436	0.33572	N
BARC_1.01_Gm01_25109157_C_T	Gm01	25109157	C	T	TGACCCACGGGTCAGGTGGTAGGCGGACATACCCATCGGTTGTCCATACAAACACAACAT[C/T]TGATGATCCTGACCCATGGGTCAGGTGGCAGGCAGACATACCCAGCGGTTGTCCATACAA	Y	C	0.638	0.49126	Y		0	0		0.008	0.003
BARC_1.01_Gm01_25224181_A_G	Gm01	25224181	A	G	CATTGTCGGATACCCGCTTTACCGTAACTTGAACCCGTCCGGGAGCCCGTTTACCCGGTT[A/G]GTGCAAGTGGCTGTGGCTGCATTTCGTAAGAGAAAGGTCCCAAATGTGTCACACCCTAGT	N	B	0.976	0.81008	Unknown	CDS
BARC_1.01_Gm01_25359763_C_T	Gm01	25359763	C	T	GGTCTTCTTTGATGGAGCATACTTCCTTTGGAAGGGACGTCAGAGTTGTGGGTGGCGGTC[C/T]GATGTAGCAACATAGAAGTGAAACATGGAACACTGAATGGAGCTTAGCTGATGCCAACAA	Y	C	0.9	0.693	Y		0	0		0.185	0.061
BARC_1.01_Gm01_25449358_A_G	Gm01	25449358	A	G	CCTGGGCTAGTGAGATTACTTCAGCTTGAAGGAACCAACTCGCCTGGGTGAGTTGGTCAG[A/G]CACCTCTTGGATCATTTTGTTTAAAAGCCATGGAAAAGTTGAAAACCAGAGGTGTGGAGT	Y	C	0.716	0.55132	Y		0.036	0	0.0157068	0.056	0.305
BARC_1.01_Gm01_25509548_T_C	Gm01	25509548	T	C	TATCACTTGGCGAAGGTGTTCGTTGACGCGAAGGGCCTAGGCCATGTCTTACGTTGTTGA[T/C]TAAATGTCGTAGTTGGGTGTAGTGGTGTATGTCGTCGTGTCCTGATTCCCCTGCGGCTCC	N	C	0.732	0.56364	Unknown
BARC_1.01_Gm01_25559932_C_A	Gm01	25559932	C	A	TGGATGGGAACGACGTCGTGTGAGTACGTGAGCTGGGAGGAGGTGTTTATGTCGAACGAC[C/A]AGGGGAGGAGGGAGGTTCATTACTTGCTTAAACGACGAGGCGGTGGCTCGGATCTGGCCG	N	D	0.71	0.4757	Unknown	CDS
BARC_1.01_Gm01_25699435_T_G	Gm01	25699435	T	G	GTCAGGGGTCTTCCCCCCGTGGGCAGTAGCGTTGCCCACTATAGGTGGTTTCATTCTTCT[T/G]AGTCTGACCTTCGTTTTAGTCCCAAAGTTAGGCCTCAACTTGTACGTAAGGCTACTTTAG	Y	B	1	0.83	Y		0.026	0	0.0104712	0.063	0.322
BARC_1.01_Gm01_25755492_G_A	Gm01	25755492	G	A	ATTTGCCTGCAATTGTGTTTAATTACACCTCTGATTTGTTAGGCGAGTTCCTATTCTTAT[G/A]GAGGTTATCGCTCGTGCCTATACTCCTAGTGTCTTTTTCTACCTTGATCTTTTTCTCTGT	N	C	1	0.77	Unknown
BARC_1.01_Gm01_25799099_T_C	Gm01	25799099	T	C	TATGCCTCCAAGGTTTTCCTCTTGATTGAGGATAACGATGATGGCCTTCAACATATCACC[T/C]CGAAACCGGATCTTGTACCCGACACAAATTAGCCTGCACACTCTTTCGGGCCATCTGGCC	N	C	1	0.77	Unknown
BARC_1.01_Gm01_25841744_G_A	Gm01	25841744	G	A	CGGAGGGCAGGCTGTGACACCATTGACAATGAGTCAAGCGTCCCTGTTGTTGGCATCGTC[G/A]CTGCCATGGCATGGTATGCCTTAACGCTAATGTTGTTGCCAATATTTATCCAAACATTGA	Y	B	1	0.83	N
BARC_1.01_Gm01_25870263_A_G	Gm01	25870263	A	G	CAACGACCAGCGGCGACGACCCCGCACGCAGCAGCGACGAACCCGCACCTGCACGACCCC[A/G]CAAAGGTGACACACACTGACACACGACCACCATCCCGTGAAGGCAACGCAGTACGCATAT	N	C	0.877	0.67529	Unknown
BARC_1.01_Gm01_25906021_A_G	Gm01	25906021	A	G	TTAATAACAATGTCATTTTGAAGCTGCCCTTGGGGATGGGGTCGGGAATGCCTTTCGGGG[A/G]TTGTTGGCGAAAGCAGTTTTGAAGAGCTGGTTGAAATTGGAGTACAGGTTTGGGTCGTCG	N	C	1	0.77	Unknown
BARC_1.01_Gm01_25932085_A_G	Gm01	25932085	A	G	CAGAAAATACGAAAAAAGATGAAGATTTTAACACCATGCCTAGCCCAAGAAGCGCTCAGC[A/G]CGCGCTAAGCAAGAAAACTGATACCTGCACTAAGCGAGCAAAGTGCGCTAAGCGCGAAAA	N	C	1	0.77	Unknown
BARC_1.01_Gm01_26021122_T_C	Gm01	26021122	T	C	CTTCTCTGACTAAACTCACACTCCTGGCCTTCCTCTAACGCCAGCAGGTCACCTAGGAAT[T/C]GGCTGAGGGCATCTGCATCAAAGGGAATCCACTGCCCCCTCGCCCATGATCGCATGTCCC	N	C	0.414	0.31878	Unknown
BARC_1.01_Gm01_26114693_T_C	Gm01	26114693	T	C	TTTGGTGAAATAGGTTGGGGTTTCGCCAGTTGGTTTGGCGACACAGTGCTGCTGCTGTTT[T/C]GCTCCTTTGACTGGCGACACAGGGGGTCAGGTGTAGGGTTGCAGTGTGCGCAGTGCAGAG	Y	B	0.915	0.75945	Y		0.01	0	0.00520833	0.216	0.257
BARC_1.01_Gm01_26159110_A_G	Gm01	26159110	A	G	GACAGACGCATCCTGCCTTTTGTCGGGTCCCTGTGCACTATACTTCCACGGTATTGCCTT[A/G]TCGCTCTTATAAGGGAAGGACGCTGGCGTCTTTGCTACAGAGGGCTGGAAACCTTGAGGT	Y	C	0.854	0.65758	Y		0.01	0	0.0052356	0.263	0.091
BARC_1.01_Gm01_26191404_A_G	Gm01	26191404	A	G	GTTGGTGTTTGAAATAGGGTAGCAAATTTGTGTGTCAGGGAAGATATGTCAGTGTATTAT[A/G]GTGGTGTTTTGGTTGAAGAGAGCTCAGGTGGAAGAACCTGGATATGGAAGAAGGCACTAG	Y	B	0.965	0.80095	Y		0	0.237	0.115789	0	0.079
BARC_1.01_Gm01_26234109_G_A	Gm01	26234109	G	A	TCCAATGAGGTCTTTGTCACCACCATTGTGTAGATCGATGGACGACAATGCCGAACGGTG[G/A]TGACCGTCGAAAAAGGGAAAAAGGTCGTCGGAAAGCAAAAGCAGCTCGCCGAAATAAGTA	Y	C	0.949	0.73073	Y		0	0		0.042	0.014
BARC_1.01_Gm01_26277298_T_C	Gm01	26277298	T	C	ATCTAACATCATGACCTAGTGCCACACACTGTAGGACGATCATGCTATACAATCATCTCC[T/C]AGGTACAACTCTATGGTCATCCTTGCTCTGAGGATGGATTCCCCAACAACACCCCCACCA	Y	C	0.996	0.76692	Y		0	0		0.074	0.024
BARC_1.01_Gm01_26319821_C_A	Gm01	26319821	C	A	ATCACAATGGTCGTGATCAGCATCACAATGACCGTGGTGCCCTTATTTTCCCATTTTATC[C/A]ATCTAACACTCTTTCTTGTGTTTCTATTTTCTGTTTCTTTTGAAATATTTCTATTTTCTT	Y	C	1	0.77	Y		0	0		0.073	0.024
BARC_1.01_Gm01_26364457_C_T	Gm01	26364457	C	T	CATCGTAGAAGCAAACGACACCGCTCATGCACGACATGATACCGACGGCGACTGTTCTGA[C/T]GGTGGAACATGCATGGGGCACCAACGACAAATCCCACTACCCATCGGTTCATGCAACGAA	Y	C	0.877	0.67529	Y		0	0		0.031	0.01
BARC_1.01_Gm01_26422300_A_C	Gm01	26422300	A	C	GGTCTCTTCCAATTCTATGTGGTACCGGTTACGCCCACAAAGCTCATCCGGCCTCCCATT[A/C]ACAGGTTTTCATTGAGAAGTACTGCATGTCAAGGCAGGCACAACAGTCGGGGCAGGACCA	N	C	0.434	0.33418	Unknown
BARC_1.01_Gm01_26540300_C_A	Gm01	26540300	C	A	TAAGGGTCGTCCTGTCTACTCTCGTATCCACACCAAAATGGATATCTGAGAATCGGGTCA[C/A]GCAAAGCGATGTTCTATGTGTCGCATTCCAGGCCATTCAAAGAAAAATTGCCTGCCCCAT	Y	B	0.548	0.45484	N
BARC_1.01_Gm01_26567804_T_C	Gm01	26567804	T	C	AACACTCCTCGGCTGAGCGTGAGGAAGAATCTGGAAGAAGGATGAGCTGTGCATTTGAAC[T/C]GAGCGAAGGGTCATCCCACTAAGCACACTGCTTCAGTCCATCCGCTGAGCGAGAAAAGCA	Y	C	0.426	0.32802	Y					0.031	0.031
BARC_1.01_Gm01_26616104_T_G	Gm01	26616104	T	G	TTTTAACAAAATCTTAGCCAATCTTTTAAAGCTCAGTAGAGCTAAACACTAACACTTTCC[T/G]TTAGAGTGGATGATACAAATTGAAGTTCCTAGAGGAATTTCTCTCTTTTAGAGATGATAA	Y	B	0.414	0.34362	Y					0.016	0.016
BARC_1.01_Gm01_26662695_G_A	Gm01	26662695	G	A	ATCTTCACCGTGTTGCAGATCTCGGTGTATGTGCCAAGGTGTGCGTACGGATCTTCACTC[G/A]GTAAGCCATGGAATAGATTCCCTTGGATCAACTGGATGAGGGAATGTGGGTAAGTGATGT	Y	C	0.434	0.33418	Y					0.031	0.031
BARC_1.01_Gm01_26820459_A_G	Gm01	26820459	A	G	CACTTGACAAAAACTCATCCATGTGAGGTGAGCCAAACTCAACCATGGTATTCAACACAA[A/G]AAGATGCACAGAGAGACACAATCGCGAAAAATAAGCAGAAAAATACCTACTTACAATGGC	Y	C	0.66	0.5082	Y		0	0		0.032	0.01
BARC_1.01_Gm01_26850909_A_G	Gm01	26850909	A	G	AAAGGTCCATGTGCGTTTTCGACACTCTTGCCAAGCGCTTCAGCGCGCAATATGTAACCA[A/G]CTGGTCACATCCCATGACATCGGCCGCACTGGCTAGCCTGCGACAAGCAGACAATGAATC	Y	C	0.854	0.65758	Y		0.01	0	0.00520833	0.229	0.26
BARC_1.01_Gm01_26898649_T_G	Gm01	26898649	T	G	ACTTCTAGCATAGCAAACACTATATTTCAGCTAGGCCAAGATTTCTTCCCATGAAAGGTT[T/G]CTTTCTGACTTCTGTTTGGCTGGGCAGCACTCTTTGTTCTGGCTGGGTCGGTGGTAACAT	Y	C	0.915	0.70455	Y					0.031	0.031
BARC_1.01_Gm01_26930738_T_C	Gm01	26930738	T	C	AAACCATTTGTTGCGCCATCGACTCTGTCAACCAATCTGGTGTCATCTTGATCCATTCCC[T/C]ATATTCCCCTTTCAACGCCATCACATCCTCCCTATAGTGTCACCATCTTTGTCGTCAATT	Y	C	1	0.77	Y		0	0		0.032	0.01
BARC_1.01_Gm01_27003365_T_G	Gm01	27003365	T	G	CAACCCCCTTTCCCCTATTGGACCTCCGCTGCAACCCCTTATGCCATAATGTCTATTTTT[T/G]ATTTTTTTTTTTCTGTCTGTTTTACTTTCTTCTTCTTCATCTCTTTTTTATCTACGGGAT	Y	B	1	0.83	Y		0	0.237	0.115789	0.016	0.086
BARC_1.01_Gm01_27051198_C_T	Gm01	27051198	C	T	TGATGATTCTTACCAGGCGTAGTGGGTCAACACGTGACTGTTGTCTGGTTGGGGGTGGGA[C/T]GGACTGACAGAGTTGGATGAATGTTGTCTGGTTGCGCGTGAGACGAAGCCCCTTCATATG	N	B	0.915	0.75945	Unknown
BARC_1.01_Gm01_27097383_C_T	Gm01	27097383	C	T	TCCACTATGCTGGGATTTCGGCACAAATCCGAAACCTCCTCCTCCTCGAGTGTCAACACG[C/T]GTTTGCCATCCACGCGACCCATGCGCTAATTCTGCCTCAAGCGCTTGCGTCGTATTCATG	N	B	0.824	0.68392	Unknown
BARC_1.01_Gm01_27129701_C_T	Gm01	27129701	C	T	TGTGATCTTCTCTGTCGAGTACTTAGCAGAGTCAACATTAGCTAAAAGGGGAGGCTGGGA[C/T]CGGTTATGGTCATCTCTAACCGCTGACTTCTTCCTGCGGGTGTCGTCAGAGGTATTATTA	N	C	0.897	0.69069	Unknown	CDS
BARC_1.01_Gm01_27164384_T_G	Gm01	27164384	T	G	ACCATGGCAGAGAATACCCGGATGAAAGAGCTCAGTTCCGACATCAAGCGCAACGCTGAA[T/G]CAATCGAAAAGATGTATAACGATTTCCACGAGAAGATCGACCGATTGGAAATCGCGAACG	Y	B	0.976	0.81008	Y		0.167	0.437	0.297872	0	0.204
BARC_1.01_Gm01_27212888_G_A	Gm01	27212888	G	A	AAAAGTCATCAGAATTGTGTCACCAGAGTTGTGTCATCGGAATGCATAAACAGGTCACCG[G/A]AAGAAGTACGACAAGCAAAAGGGTCTGCAGGGGATAGTGGGTTCCCGGTGAGGCACAATT	Y	C	1	0.77	N
BARC_1.01_Gm01_27240736_C_T	Gm01	27240736	C	T	ACAGTGAATAGTACTGCACGACTGCTTTGCCCTTGTGAGACAAACATCCCGATGCCTTTT[C/T]GTCAAACCTCACCTTCGACCACTATCATCCATCGCTGAAGACCCACCACGCTGTCCACAT	Y	C	0.976	0.75152	Y		0	0		0.031	0.01
BARC_1.01_Gm01_27329713_A_G	Gm01	27329713	A	G	CCCCTGACCTCCAAACCTTTTTTCCCGTGCTTCGCTTCTCGTCGGCCTCCCTTTTCCACC[A/G]CACCAAAGCCCTTTCTCCGTCAAGGTCGCCATCATAAGAGACTAAAACCCTCTCTCATGT	Y	A	0.976	0.976	Y		0.01	0	0.00520833	0.167	0.059
BARC_1.01_Gm01_27390314_C_T	Gm01	27390314	C	T	AGTTCTTAGGGATGTGGCACCGAGTTTGTGGTCATGTTTCCACATGTTGACTTGGCAATC[C/T]TGACCAATGCGAGACATAATCGTGTCTGTGAAAACCCGCCATTGTATTGTGGTAAGGGTG	Y	C	1	0.77	Y		0.01	0	0.00520833	0.174	0.062
BARC_1.01_Gm01_27463902_G_T	Gm01	27463902	G	T	ATTCTACCACAGACATTGTTTTGAAAGTCCCAATGGCGAGTCTGTGCGGAAGTAAGTTCA[G/T]AACCTATTTTTTAAATTTCATGATAATCCAACGGTTAATGAGTCTGGGATCATCGTTTTA	Y	A	1	1	Y		0.083	0.479	0.278947	0	0.19
BARC_1.01_Gm01_27491996_C_A	Gm01	27491996	C	A	CTTTGCAGCGGCTGGGTGAAATCCTGCCCCAGTATACATAGTGGCTGAATGATAGCCTCC[C/A]TCTGGTATTGCTCGCATAGTCAGCCCTCCTTCGAGATCAGGGAGGTGACCAAGGGACTGA	Y	B	0.651	0.54033	Y		0.01	0	0.00520833	0.182	0.063
BARC_1.01_Gm01_27580780_T_C	Gm01	27580780	T	C	TCTGAATTTCATGGTGCCGCTAAGCGCAACCCTACTGAGCTTAGCGCACATCTGTTGCGA[T/C]AGTCATTAGGCTTAGCAGGAAGAGGCCAGCTAAGTCGATTTTGCAGAAGCAGAATTTTCC	Y	C	0.681	0.52437	Y		0.01	0	0.00526316	0.372	0.125
BARC_1.01_Gm01_27609191_G_A	Gm01	27609191	G	A	AGCGCCAGTCGTGTGCTGAGCCTGGTTGAAGACAACTGTTGTGCTGAGCGCATTGATCTC[G/A]CTCTTAGCGTGCGGCCTTGATGATGATGCCCTACCAGATTCTTCTGTCACGCTGAAGTTG	N	C	0.414	0.31878	Unknown
BARC_1.01_Gm01_27640696_T_C	Gm01	27640696	T	C	CTCGCGTTGAGCGCATATGTCCAGTTGGATCAAGTGGTCATGCGCTAAGCGCAGGATGCG[T/C]GCTTGCTCATGACAGCTATCTTTCAATGTGGCTTCCTATGCTTAGCGGCTTGCTTGGGCT	Y	B	0.797	0.66151	Y		0.01	0	0.00520833	0.371	0.126
BARC_1.01_Gm01_27682758_C_T	Gm01	27682758	C	T	GTTTCTGAGCATGCTCAAGGCATCCTTCACCTTGAAATCCATGGCTCGAAGAAACTTTAG[C/T]AGAATCACATCGCTCCTCTCGTCCCCAACCAGGGGAATTCCCCATACACAACCACACACA	N	C	0.842	0.64834	Unknown
BARC_1.01_Gm01_27713229_T_C	Gm01	27713229	T	C	AGCTTTGAGCAGAGGTGCCAGCAGGTGTAGAAACTGGAGCTGGAGCTACTGATGGTGGAG[T/C]TGAAGTAGACGGAGCTGGAGTAGAAGCAGGGGGAGCAAAAGAAGAAGGGCCCTCAAATCC	Y	B	0.789	0.65487	Y		0.01	0	0.00520833	0.465	0.195
BARC_1.01_Gm01_27745720_C_T	Gm01	27745720	C	T	CCAGCACCACTAGCAGCTCCACAACCACATCAACAAGGCCAAGCATGTGTGGAAGAAACA[C/T]GTGTTTTTCCTCCTCTTCTACGTTGTCACGTCCGCCATGCTCGACGTCTCCGACGACGCC	Y	C	0.915	0.70455	Y		0.01	0	0.00520833	0.011	0.007
BARC_1.01_Gm01_27797385_T_C	Gm01	27797385	T	C	TCAGCAATGAACAATAAGACGCGACCCTTGCAACGGTGAGAGGAGCTCCACTTCTCATCA[T/C]AGTTGTAATAGAGGCCTTTCTCGCGGTATAAGGCCATCTCCTCTGGGGTGAGTTGGACAA	N	C	0.949	0.73073	Unknown
BARC_1.01_Gm01_27845390_G_T	Gm01	27845390	G	T	TAGCCACCTTTACTACATTCATAGGTGGAGTCGGAGCACTATGACACACCGATACCTCCT[G/T]CCTTCATGAAGCGGTACCACATTCTCGACACCTAGTTTTGGCTCTCCGAGACTGACTACT	Y	A	0.996	0.996	Y		0	0		0.053	0.017
BARC_1.01_Gm01_27868970_G_A	Gm01	27868970	G	A	GCCAGAGATGTTTGTGACCTTAGAAGAGGATGGATCATCTTTAATGTGCATGACGGACGC[G/A]TCCTTCCTTCTGTCAGGCCCTTATATGGCGTACCTCCATGGCATCGCCTTGTCACTCTTG	Y	B	0.7	0.581	Y		0	0		0.126	0.042
BARC_1.01_Gm01_27926266_G_A	Gm01	27926266	G	A	TCCATGGAACGACTTTATTGCTTTGATAAGAAAATGGTGTCGGTTTGGGCGCTGTCGGGG[G/A]GTACTTGGAGCTGGAGCCGGTCACATTCCTAGTGAAACATATTACTAGGGTTTTGGGGGT	Y	C	0.434	0.33418	Y		0.01	0	0.00520833	0.38	0.13
BARC_1.01_Gm01_28022641_T_C	Gm01	28022641	T	C	AAACTTGGACCTTTCCTTCTCATACCATCCATGATAGTTTTCATTGTGTGTAATAGGGTA[T/C]TAATATCATGCTTACCTCAACAATCCACTTGCGACCCCACCATGCTCATTTTCTCTCTAA	N	D	1	0.67	Unknown
BARC_1.01_Gm01_28059147_T_C	Gm01	28059147	T	C	TCTTCCAATCTTTTCTCAAAGAAAGTAAAAAAAAAATTAGAGGTGGGAGTGAGGGTGAAA[T/C]AGATTGGGCTCACAGAATACTTCAGGACTCGAGTGAAGACCCATACACCTGCCAGGAATT	Y	B	0.839	0.69637	Y					0.008	0.008
BARC_1.01_Gm01_28101725_T_C	Gm01	28101725	T	C	TCAACACATTGACAGTGAACAGCAATGATAGTTGGGGTCTATGCTAGGCATATCTATTGT[T/C]GACCATGCAGACAAGTCGGCATTGGCATCTAAAGCTCAAACTATGAGTAGTTGCTTTGCC	Y	C	1	0.77	Y		0	0		0.389	0.126
BARC_1.01_Gm01_28147874_G_T	Gm01	28147874	G	T	ACTTGAAAGGTCGCAAGTGCAGACAAACCAGAAAGTGCATGAAGGCTAATATGCGGGAGA[G/T]GTTGTGGTGGCGGGGACACGACAATGGAATCTGGTGGTTCTGGTGATGGGGGTCAAGGTT	Y	B	0.996	0.82668	Y		0	0		0.011	0.003
BARC_1.01_Gm01_28179606_A_G	Gm01	28179606	A	G	GGACCTCGTCATTTGCATGATCCACATACTAAACATCCTTAGCAACAAGTACAACTTCTC[A/G]TTGCCTACATGTAGGTGCTGTGGGCTTTCGCTGCTGGGGTCCTTCATCGACATCACGACT	Y	C	0.877	0.67529	Y		0.01	0	0.00520833	0.189	0.272
BARC_1.01_Gm01_28244453_A_G	Gm01	28244453	A	G	TAAATTTTAAATTATAAAATAAATATTTTGTAACATGTTATGGGTTGTGATGTGGCCTCT[A/G]TAATAACTGTGGGGAAAGACGTGAATGGACAATAGGGTGTCGATACCCACTATTGAGGGA	Y	C	1	0.77	Y		0	0		0.221	0.073
BARC_1.01_Gm01_28287783_T_C	Gm01	28287783	T	C	CGATGGCGACAGTGGCACTAATGGGAGTGAAAGAAGGTTGGTGAAGAGTGACGTTGGCGA[T/C]GGTTCCAGAACTGGTTAAAACGCACACGTCAATGTTCTTTTTGCGGTTGAAGCGGGCTAG	Y	C	1	0.77	Y		0.01	0	0.00520833	0.338	0.115
BARC_1.01_Gm01_28312993_G_A	Gm01	28312993	G	A	TTTCTTCCTTTGTTAACAAGTTATCCATAAGAGACCATATTAATGTCTAACTTAGGGAAA[G/A]GGTCTGTATCCATTGCCATTTCGGCTGCACCTTTATTGGCTAGCTTAAAATGGCCTTTTT	Y	C	1	0.77	Y		0.01	0	0.00520833	0.339	0.116
BARC_1.01_Gm01_28364595_A_G	Gm01	28364595	A	G	TGATGACATACAGTTGGTACACTTGGGGATGGTTTCAACTAATGTTATAAAAACCGGATC[A/G]GATTGGTTTGATCGGGAGTTAAGACCTACACCGGTCCGAGCTAGTAGTTGGATCAATCAT	Y	C	0.976	0.75152	Y		0.01	0	0.00520833	0.468	0.157
BARC_1.01_Gm01_28420702_C_T	Gm01	28420702	C	T	GCTCAAAAGCTCACCGGGAAACCCTCACAAGAAAAGAACTATCAGACGAGAGAAAACTAT[C/T]AATAATAATAATTAGTTTTCAATTCCTTTAATTATTTAGCCGTGTAAATCTGTTATTTCC	N	A	1	1	Unknown
BARC_1.01_Gm01_28466786_A_G	Gm01	28466786	A	G	CTCCACAAAAACAAGAACATGCCCAGCAAATAAGAGGCTTAATCAACACCCTTATGGGCG[A/G]ATTCTCATATGGAGGACAATCTAGTCAGTCTCGCAAGTGCCACCTCCATGCCATTCGAGG	Y	C	0.9	0.693	Y		0.01	0	0.00520833	0.231	0.077
BARC_1.01_Gm01_28536363_G_A	Gm01	28536363	G	A	CAGCACCGCCCGATGCAGTCGCGTATCTTCGTTAACCACCTCCCCCGCGATCCCTTCCTC[G/A]CTCCTTGGTAGCTCTTGCTCACGGACGATTGCGCGAAAATCCCTTTCTAAACAATAGAAC	Y	C	0.976	0.75152	Y	5UTR	0	0		0.25	0.082
BARC_1.01_Gm01_28563541_A_G	Gm01	28563541	A	G	AAAGGAGAAGTTTTCCCTCACCCCACGGTGGGCACCAAATGTTCTTATCAGGTTTGGCAG[A/G]ATCTTCTCATGGTGGTGATCCTCCGTGAGCTCCTCCACGAACAAGGGTGGGGTACTAGCA	Y	C	0.563	0.43351	Y		0	0		0.052	0.017
BARC_1.01_Gm01_28599526_G_A	Gm01	28599526	G	A	TTGCCACCCACCAACCCTCTCTACGCACCCTCCACTTCACCCCCACCCGCTCCCTTCTCC[G/A]CACATCGCTCCCCTCTCTACTCCCCCCCTCCCCGTGCGGCCATCTCTTATGCGCCGACAA	N	B	0.685	0.56855	Unknown
BARC_1.01_Gm01_28628358_A_C	Gm01	28628358	A	C	AAGAAGGGGTTTTCATAGTCTAGAAGGATGTGTTGGAGAACTATGTTATATCCTACTTCA[A/C]AAATCTATTTTCTGATGATTTTGATTATACTCCTTTTTGTTTAACAAACTCTTTTCCTTC	Y	A	0.935	0.935	Y		0.49	0.463	0.47619	0.112	0.386
BARC_1.01_Gm01_28759367_G_A	Gm01	28759367	G	A	GATGTCTGCCTTAATAGTGAAGGAGTTAGAGTCCGGGGATATGTTTAGAGATTTGAACCT[G/A]TATGTCGATGTGGCTCATGATCGCATTAGTTGTGGCATGTTAACAGTGACTAATGATTTT	Y	A	1	1	Y		0.406	0.447	0.425532	0.011	0.289
BARC_1.01_Gm01_28788420_T_C	Gm01	28788420	T	C	AATCTTGTGTTCCCGGGACTGCTAAAACAAAATCAGTGTATGAGAAAGGAGAAATCGTAC[T/C]GGGCAAAAAAATGTTTAAACGTGTCTTTTGGTCATTTGGTCCATGCATTAATGACTTTGT	N	A	1	1	Unknown
BARC_1.01_Gm01_28848622_A_G	Gm01	28848622	A	G	AATGGATTCCTGAAAGTCTTCCAATTGATCTCATAGCTACCTTAGACTTTGACGGGTGTG[A/G]CTTGGCCCACTCTCTTGTGAAAATTCCACTTTAAAATTAATTAAAAAAATACTCTGTTTC	Y	A	1	1	Y		0.479	0.432	0.47619	0.01	0.354
BARC_1.01_Gm01_28876725_G_T	Gm01	28876725	G	T	GAATTCTGGATACCCAGGGTGTTGGGCCCCTTCCTCTCAGCCCCCTTATGCCATTTTATA[G/T]CAAAATGGGGGAGGTGGTTGCCGCCCAGCTCGCCCAAGTGAGCTCAACTCGCCCAGGCGA	N	B	0.641	0.53203	Unknown
BARC_1.01_Gm01_28913996_A_G	Gm01	28913996	A	G	CGAAGGAAGATGTATAGACAACAAAAAAGTCTGTATCACCCTATCTACTTCTCTCTCTCG[A/G]CAACGGAGTGGAACGCGGGGGAAAGGAACAGACGTGAGGGGATGACATGGAGAGAAGGGA	N	B	0.832	0.69056	Unknown
BARC_1.01_Gm01_29014653_T_C	Gm01	29014653	T	C	TATCCATATTCTCAACATCCTCTGCAACAACTGTAACTGCCCATTGTCTATGTGTCGATG[T/C]TGTCGGCCTTCGATGCTGAGGGGCTTCTTTCTCATCACCACTAACCTGTCTACCTAAGGC	Y	B	0.8	0.664	Y		0.073	0	0.0364583	0.211	0.094
BARC_1.01_Gm01_29091115_A_G	Gm01	29091115	A	G	GTCCGAGATCGTAGTTTTACTGGAACAAGTTTTGGAGAGGAAGAAGGGAGAATGAATTTG[A/G]GAGGAAGAGAGGGTGTACAAACATAACATATCTTAAATGTAAAACATGGACCTAATATGT	Y	C	0.935	0.71995	Y		0.427	0.431	0.428571	0.219	0.359
BARC_1.01_Gm01_29142420_G_A	Gm01	29142420	G	A	GCTGCCATTGGGCAACCATAACACCCTAGCCGTGTCCGTGCTGCCTCCTGAAGACCTACA[G/A]CAGCTGACCCAACAAATCAGGGACCAGCTGGAGGAGTCAATCACAGAAAAAGTGACTCGG	Y	C	0.545	0.41965	Y		0.113	0	0.059322	0.223	0.132
BARC_1.01_Gm01_29169958_A_G	Gm01	29169958	A	G	AACTAAGGAATTAAACATTAAGAAGAAAACCTGCGAGGCAAACTAGGAACAGAGAGAAAC[A/G]GAATCATTGCAAAGGCGGATGATATCCCAAGTGGTACAATACGCAGAGGAAAAAGACAAC	Y	B	1	0.83	Y		0.427	0.436	0.430851	0.221	0.363
BARC_1.01_Gm01_29207555_C_T	Gm01	29207555	C	T	GCTAAGCGTGCTTTGCCTGTTGAATCTGTGCATTGTGTTGAATGCCTGGGAGGTGTTAAG[C/T]GCACCTCTTTGAATTTCCAATTTGCTATTTTGGGCTTTACTTTACTCACTAAGCATCATA	N	A	1	1	Unknown
BARC_1.01_Gm01_29284158_A_G	Gm01	29284158	A	G	CCCTCATGTTCAAACTAGGTCAAAAAGGCTTTGCACCCATCATCGGGTATGGAACGGTTG[A/G]CATTCCACCGTTCTTGTGAAAAAACTCACGTTCCATAACTGTTCCTCATCATCTCTGATC	N	A	1	1	Unknown
BARC_1.01_Gm01_29309543_A_G	Gm01	29309543	A	G	ACGAAAAGAGAAGAAGTTGGTCAACCACGGTGGCTAGATCTTGCCACTCCCCACTGAGCT[A/G]ACGGTGAGGGCTTATGTGTTGCAGTCAGGGTTATCAGCCCTAGTTATGGCGTGGTACCCT	Y	B	0.915	0.75945	Y		0.448	0.441	0.44385	0.021	0.377
BARC_1.01_Gm01_29345352_C_A	Gm01	29345352	C	A	CCAGAATTTGGAGAGGATCCAAGAAACCTAAGGTTTGGTCCTGCTTTAGATGTAATGAAT[C/A]ATTTTAGTAACTTGAGCACCAGCCACAGTTCATGGCCTATTTTGCTAATGATTTACAACC	N	C	0.436	0.33572	Unknown
BARC_1.01_Gm01_29429755_C_T	Gm01	29429755	C	T	TTGTTACATTTGCCTGTTGTAGAGGCATTCCACATCTTGAGCAACTTCATGTCGACGACG[C/T]TGTCCAGATGTTGGTGGAGTTACTCGAGGTCAGCATTGCAGAGGCAAGAGCAGAGACCAT	Y	C	0.976	0.75152	N
BARC_1.01_Gm01_29471019_T_G	Gm01	29471019	T	G	GGAGGTATCGGGGGTGGCGATGTGGGAGTTACAACTGGTGATACTTTTGGTGGTTGTGGT[T/G]GTGGAGTTTGGGGTGGTGGGGCTTTTGGGCTTGAAGCAGGTGCAACTTTTGGAGCTGGTG	N	C	0.854	0.65758	Unknown	CDS
BARC_1.01_Gm01_29544297_A_G	Gm01	29544297	A	G	TGGAGCAAGCTCATGCGCCAGTTCATCGTCTCACAGTACTTGGGAAATGATCGTAGGATA[A/G]AATTGTCCTTACGAGTGAGGTGCCGAGTTGTAACTAATGTCACCGAGCCAACTTGGCAAC	Y	C	1	0.77	Y		0.073	0	0.0364583	0.197	0.09
BARC_1.01_Gm01_29566700_G_T	Gm01	29566700	G	T	TTGGTTTGATTTGTTTTCTTCAGTTTTTCTTTGACCCTTAATTGGGTAGAGGGGTTTTGA[G/T]TCTTTGGGGTTGTGAATTGTGGTTGAGCTTGAAGAGGGGGTTGTGGTAGGGTGCATTGAG	Y	C	0.868	0.66836	Y		0.354	0.426	0.388298	0.018	0.269
BARC_1.01_Gm01_29612748_G_T	Gm01	29612748	G	T	TTTTGAACTTTACTCGTTGTTTTACGGCAACCCCACCAACGTGCAAGATGAGTAATTTTT[G/T]ATTGAACGCTCTTGGAAGTCCAAACTCAGGAGCACAAGTCGCTTGAGCAAACAAACCAAT	N	C	0.435	0.33495	Unknown
BARC_1.01_Gm01_29679260_G_A	Gm01	29679260	G	A	TGGAAGGCATCGAGTGTTTGATGTCCCAAAGGGTAGGTCGATCCCTTACATTCTTGGACT[G/A]ATAGTGCTAGCTTGTACATCCCAATAAACGCATAGACAACTTATGATGATGAGTATACCT	Y	A	0.996	0.996	Y		0.354	0.436	0.393617	0.011	0.273
BARC_1.01_Gm01_29709636_A_G	Gm01	29709636	A	G	CAATGTTGATCATGGTGGTGGTTGCAGCGATGATCATGGTGGTGACAACAAAAAGTTATA[A/G]CAACCGAGGTGGTGGCAATTGACGACGTTGGTGGTAGCAACAACGATTATGATAGTGGCT	N	B	0.878	0.72874	Unknown
BARC_1.01_Gm01_29731027_C_T	Gm01	29731027	C	T	TTGACTTTGGTAGTGGTGGTTGTGCTCGCTCCATGGCTATGACAGGTCTCTTTCCTTGTC[C/T]ACCGAGAGGCTTTCCATTCCTAGGTAAAAAATTTAATCCCCTTGTTGTCATGAGCCTAGG	Y	C	1	0.77	N
BARC_1.01_Gm01_29763506_C_T	Gm01	29763506	C	T	AGGTCGGATTATGCCACCATCTTCTGTTGCCCCTGCTGCTGGAGAAGGGGGTCATCCTAC[C/T]GGTGAGGTTGGCCCTGCTACTATTGTTGTTAAGGTCTCCCTCAACGCTCATTCCTCTGTT	Y	C	0.759	0.58443	N
BARC_1.01_Gm01_29787876_G_A	Gm01	29787876	G	A	GACTTTTTCTTAGTGGGAAATCTATCCTTCCTAAGATAGAGCCAAACCCAATCCCCTTTT[G/A]ATGCAATCCTACCCCCCAAGGGTATTGGATAGAAGAATCCAAGAGGATTGGACTAGAGCT	Y	C	0.436	0.33572	Y		0.358	0.433	0.393443	0	0.397
BARC_1.01_Gm01_29817264_G_A	Gm01	29817264	G	A	AGCGCGAACCCCAATGACACGGTAGCAATTGACCTAGAAGCTGCAAAAGGGGCAGCGTCA[G/A]CACAGCAGATTTCAGAGGAGGGCGGTACAGATTACACAAATGAGGAAAAAGGGAGTGACC	Y	B	1	0.83	Y		0.074	0.01	0.0418848	0.182	0.087
BARC_1.01_Gm01_29851956_C_T	Gm01	29851956	C	T	GAACAGCCTTAACTATGTGCATTGCGTGATCCATATGCCATATTACTTCGAACAAAGATA[C/T]TGTTTTGTATATGATGACAGAAACAAAGTTTGAAGCTAAGGCCTTGATAAAACTATCTAA	Y	B	0.868	0.72044	Y		0.269	0.342	0.261438	0	0.352
BARC_1.01_Gm01_29874074_A_G	Gm01	29874074	A	G	CGAACACTCAAAAGGTCTCAAAAACCAACGACTTCGCCTACGTCGCGGTACCGATGGTGT[A/G]AGCAGCGGGTCACGACGAGAAGGACTTCACGGCGACAACCAAAACGTGAGGCTGGAAGCG	Y	B	0.729	0.60507	Y		0.073	0.01	0.0416667	0.188	0.09
BARC_1.01_Gm01_29899559_C_T	Gm01	29899559	C	T	TGGACCCAATAGTCAGATTTGTAAGCTTTGGGGCCTAGTGACCTTTAGTGAGCTCAGCTG[C/T]TAGGGTTTTATGAGGGGCTGATCATTGTTCACGTAGGCAGAGATATTGTAGGGTTTCATT	Y	C	0.768	0.59136	N
BARC_1.01_Gm01_29927319_G_A	Gm01	29927319	G	A	GTGGACATAATCGTGGCCGTTGAAGGCCTCCAAGATCACTTGGTTCGCGGTGAAGTGCGC[G/A]AACTTCAATTAAGGACACGCCTCCAAGCTCAGTTTTTGTGTGATGCTAATTCTCTTACTA	Y	B	0.9	0.747	Y		0.354	0.436	0.393617	0.039	0.277
BARC_1.01_Gm01_29952010_T_C	Gm01	29952010	T	C	GCAAGATTGGTGAAGTGGAGAATTTATTGATTCACTAAGCCGTTTCACATGCTGAGCGAG[T/C]AATCTGCTAAGCGCGACGTCCGCTGGCTGAGCGCATAGAAGACTCTAGAAGAAGGATGAG	Y	C	0.619	0.47663	Y		0.427	0.453	0.439153	0	0.442
BARC_1.01_Gm01_29990637_T_C	Gm01	29990637	T	C	ATGATCAAGATTAAAATTAGTTAGTGGTCATATAACCACTTAAAAAAGTCATGCATTTTT[T/C]TTTTAAATCTTTGATCATTCAAATATTTATACACATGATATATATCAAGTGAGAACTCTT	Y	A	0.557	0.557	Y		0.427	0.445	0.435484	0.163	0.43
BARC_1.01_Gm01_30013276_C_A	Gm01	30013276	C	A	CTATATTCTTCAACACTCATACTCCCTTGTCTAAGCCTTTGGAGCTTGTCCAAAAGCTCT[C/A]TTTCATAGTAGGGGGAATGCGCCTCTTCCTAAGGGCACTCTTAAGATCATTCCAATACTC	Y	C	0.436	0.33572	N
BARC_1.01_Gm01_30037498_A_G	Gm01	30037498	A	G	TCCCAGTCCAAGTCCTCCAAAGAGAGAAAATTTTGTAGGGGGTCCTTAATCCCCATATTT[A/G]GGAATGAAGCCTATACTAATTCTTTAGAAATGTCTATAGCCTGTATAAAATTACAAGAGG	N	B	1	0.83	Unknown
BARC_1.01_Gm01_30080907_T_C	Gm01	30080907	T	C	ACTACTTGCCTAAAAGACCCAAGTCCAGTACTATTAGACCAAGGGTGTTACTTTGGGCAC[T/C]CAGCAATTTTGTTGGGACACCCAACACCCTAGGTGAAAGGGTTAAAATGTCTTTCATCTT	Y	C	0.9	0.693	Y		0.427	0.438	0.431579	0.031	0.391
BARC_1.01_Gm01_30101559_A_G	Gm01	30101559	A	G	ACTCGCCTAGTTCGATACAATCGCGACACCCAACTGCTTGTATCTCTGTCTATTAATTAC[A/G]CTCAAGGCTACTCATATGAAAGTTCGTCCAAAGCTAATGATTCCAGCAGTTTCAGAGGAA	Y	A	0.842	0.842	Y		0.137	0.453	0.294737	0	0.47
BARC_1.01_Gm01_30138018_T_C	Gm01	30138018	T	C	GCGCTGAAAAAAGAAAAAGAGGTACAAGACAGGGAGGAGCCAAAAACCAGAGCTGAACCG[T/C]GAAGGACCACCCTCGGTCCTAACGCCGACAACGATAACTACGGGACCTCGACAATACCCA	Y	C	0.996	0.76692	Y		0.073	0.01	0.0416667	0.189	0.091
BARC_1.01_Gm01_30214652_A_G	Gm01	30214652	A	G	TTATGGGGCTAGGGGTTTATACTGATATTGAACTCTGAAAGTTCTATTGACCGGGCCAAC[A/G]GAACTACTGATCAGGTGCACTCAGAGTAATGTATGAGCAGAGTGCTCGTCACCCTGGGGG	N	C	0.996	0.76692	Unknown
BARC_1.01_Gm01_30257032_C_T	Gm01	30257032	C	T	TTGAATTAGCGGTATAGACTTCTGACTGGCTTATCACGTGTCAGTTCCTCACTTGGGAAT[C/T]GGGGTGGCATGGTTGCACAAAACTTGGTGGGTCTTGAGGGAACTCCTCTTCTATTGCGAC	Y	B	0.436	0.36188	Y		0.354	0.432	0.391534	0.023	0.273
BARC_1.01_Gm01_30294082_A_C	Gm01	30294082	A	C	ACACTCTATGACACTTCACATGGTGACACTTTACTCAACTTCCATGTTGGTCAGAACCCT[A/C]CACCTTCCTGAGACCTCAATAATCTACCCTAGCTGCTTCCAGGATCAATGATTGTCCCCA	N	B	0.996	0.82668	Unknown
BARC_1.01_Gm01_30331952_G_A	Gm01	30331952	G	A	TTCGATTTCCATTTATCATACTACATTCTTACTTCCTATTTGTCCGTTTGATCCCTCTCC[G/A]CTGATCTCTGGGTTCTGCAGACCTATCTTTCCACAAAGATGGGTCTCCAATGAAGTGTTG	Y	C	0.434	0.33418	Y		0.354	0.427	0.389474	0.021	0.269
BARC_1.01_Gm01_30355841_T_C	Gm01	30355841	T	C	GATCAACCATTTTGTTTTTGTTTGTGTTGCATTTTCTAGATTTCATCAAAATGATGCTCG[T/C]ATACAATCAAGATTGAGAAATTCACAGGGAAGAATAGCTTCAACCTTTGGCGCATCAAGA	Y	A	0.687	0.687	Y		0.427	0.438	0.431579	0.031	0.391
BARC_1.01_Gm01_30497942_T_C	Gm01	30497942	T	C	CCTCCCGATGAAGTGTCCTCGCTCATGAACTTGATTTCTACGGGATCCTCTTGGTCTTCC[T/C]ATCTCTGAAATGAATAACCAATTTTTCTTTATGGTACTCTTCAAACTTCTCGAAATAGAG	Y	C	0.996	0.76692	Y		0.354	0.436	0.393617	0.032	0.275
BARC_1.01_Gm01_30565366_T_G	Gm01	30565366	T	G	ACCTTAACTAGGTATGTATATTTTTTCGGCTTTCATAGTTTTGGTTTGTATATTCATAAT[T/G]ATACCATGAGCACTCTAGGGCATCCTCAAGATATGTTTTCAAATACCTCTATATAATTAT	Y	B	0.768	0.63744	N
BARC_1.01_Gm01_30587474_G_T	Gm01	30587474	G	T	TCTAAAGATATCAGTCTGAAAAGGCGCACCACGACTATGTTAATATCTATCAAGGTTGCA[G/T]TCGGAAGTGACACTGAAGCTCTGGGGTGTTGTGGATTGACTACGACCCACATGGTTAACC	N	C	1	0.77	Unknown
BARC_1.01_Gm01_30663279_C_T	Gm01	30663279	C	T	GCCCAATTGACATGGGGGTCCAGGCAGAGAGTGATTTACGCTTAGCAAGATGCCACGTTG[C/T]GCTTAGCCCATCGATGATCAAAGAAAAAGATTCACAAATGAAAAAGATCACCGATGATCG	Y	C	0.935	0.71995	Y		0.354	0.432	0.391534	0.158	0.316
BARC_1.01_Gm01_30688226_T_C	Gm01	30688226	T	C	AGGATTGCATCAAATAGTGTGTACAACATCAGCCCTGTCACAACCTACCCTACGGCGGGG[T/C]TGCGAAAAAAGGCCAAAATAACAGGCCGAAGCGTTTGTCTCCAAGGGAGAAAATGAGCGG	Y	C	0.435	0.33495	Y					0.185	0.185
BARC_1.01_Gm01_30709670_A_C	Gm01	30709670	A	C	TGCAAGACTCACTTATCATAAGGAAGCTTATTCTTGTTTCGGTCGGTTGAATCCCGGCGC[A/C]AAGTACCATTAGCACTACTATCCTTCTTCATCTGCTTTCTAATGGATTCTTTCAACTTCT	Y	B	0.9	0.747	Y	CDS	0.354	0.426	0.389474	0.164	0.315
BARC_1.01_Gm01_30739311_T_C	Gm01	30739311	T	C	TCCATTGCAGACTTGCCGGCAGATATTTGCACATTACTCATCAAGTTCGGTGCGTTGTTT[T/C]GTCCCCTCCATGCAATGCCTCTGGCCAAGGACACCAACCACCATATACATTTGCTGCCTC	Y	B	1	0.83	Y		0.073	0.01	0.0416667	0.195	0.093
BARC_1.01_Gm01_30799581_C_T	Gm01	30799581	C	T	TCGCTGCTGGTTGTTATGTGCAGCGGGTCACGCGTGGGTGTGGGGTGTCGTGGCTGGTTA[C/T]AGGGGTTGCAGCTGGGTTCCGGGGTCGCAATTTGTGTTGAAGCTTGGAGGGGTCGCAGCT	Y	B	0.708	0.58764	Y	Intron	0.073	0.01	0.0416667	0.197	0.093
BARC_1.01_Gm01_30843165_G_T	Gm01	30843165	G	T	TAAAGAAAATTTTGTATGAGTTTCATAGTACATTGTTAGGAGGACACTCCGGATTTACCA[G/T]AACACTGCAGAGAATTGCTTCTCAATTTTATTGGCATGGTATGCAGTAAGACATCAAGGA	Y	C	0.646	0.49742	Y		0.188	0.436	0.308511	0.018	0.214
BARC_1.01_Gm01_30886653_C_T	Gm01	30886653	C	T	GGATACGGAGCCCACTGAAAGTGAGGACGCGTAGCCTTCTAAAGGCGAAGGCGTGCAACT[C/T]TCTGAAGTGGAGGATGCCCAGCCTTACCAAGGCGAGGACGTGTAGCCCTCTGAAGAGGAG	Y	B	0.434	0.36022	Y		0.354	0.426	0.388298	0.164	0.316
BARC_1.01_Gm01_30958450_T_G	Gm01	30958450	T	G	CCTCAAAAGCCAAGCGAGAGGAAGGAGGAGGCCACTGGCATTGACTCACTCTCTGCCAAA[T/G]TGACCAATATCACCGAACTAAGCGATGTGACCTCTAGTGGTCGCATCTTTGCGGCACCTG	Y	C	0.842	0.64834	Y		0.073	0.01	0.0416667	0.188	0.09
BARC_1.01_Gm01_30987115_A_G	Gm01	30987115	A	G	ATATTTCATTTAAGGTCTAGTGCTAGTTCTAGCGCCAATACTAGTCTTGAGCAACCTGTT[A/G]AAAACAATAGTGAACCTATGTATGAGGACTTGAGAAGGAGTAAAAGACAATGGACAAAGA	N	A	0.9	0.9	Unknown
BARC_1.01_Gm01_31013448_G_A	Gm01	31013448	G	A	CAACGAGTTAACACCAAACCCAACCCAGCCCGACCCACGAACACCCTTATCCAATTTTGC[G/A]TTCTCTTGGCAATTAATTTGGCTTGGTGGAGCGGAGTACTGTTAGTCGGTGAATGCGACT	Y	B	1	0.83	Y		0.427	0.447	0.43617	0.047	0.393
BARC_1.01_Gm01_31063184_G_A	Gm01	31063184	G	A	TCTTCCTACGATGCTTCTTGTCATGAAGAACCTGGCCACTGGACCAATACTTCGCAGCGC[G/A]TGCCATTAGCGGTAGCAATCAACTTGGAGTCAATGATCGTGAAGGGAGTGTTGGTGGTTT	Y	B	0.799	0.66317	Y		0.073	0.01	0.0416667	0.178	0.087
BARC_1.01_Gm01_31177840_G_T	Gm01	31177840	G	T	TATCCGCATCTTTTGTCAACTAGGGGCGAACGAGCCCGTTGACATACAGGGACTAACGTC[G/T]TCTCCTGCACCTTTCGTCAATCAGGAGCAAACAAGCCCGTTGACGTGCAGAGACTTACAT	Y	B	0.414	0.34362	Y		0.354	0.426	0.388298	0.047	0.279
BARC_1.01_Gm01_31202345_C_T	Gm01	31202345	C	T	GTTGTGGGGACTGAGCTGGAGTGGTCTCCTTCTCTGTTGTTGCTAATGATGGTGCTGGTG[C/T]TGGTGGCTCCTCAGTCACAGGCTCCTAGGCTGTGGAGGCCCCACCCTCTCCAGAGGAAGA	Y	C	0.526	0.40502	N
BARC_1.01_Gm01_31260313_A_G	Gm01	31260313	A	G	TATGAAGCATTGTGTCTTCTCGTTCGTCTTCTTTTTGCCATGCCTTGGTTGCTGCCATTT[A/G]TGTCCATTGTCGCCGTTGAGCCACTCGACGTTGCTGTCATCGCGTTATCATCATCATTGT	Y	B	1	0.83	Y		0.073	0.01	0.0416667	0.2	0.094
BARC_1.01_Gm01_31303087_C_T	Gm01	31303087	C	T	CAAGACGAATTCTGTTTGTCTTTATGTGGAGCGAAAGAAGCATGGGATGGAAGAGAAGCA[C/T]CAATGAGGCATGGCATGACAATGCATGCAGAAACCAGGCCAAGACACATCAGAGTGATTA	N	C	1	0.77	Unknown
BARC_1.01_Gm01_31348255_C_T	Gm01	31348255	C	T	CATGAGCTCATCCATCTTTGCCATCATCATCAGCTCAGAAGGACTCATCTATTTTTCTTG[C/T]GTTGCCTTTGATGCACTTCCTCCTTCCGCAGGCTTCTTAATCCAACCTACTTCTTTTTCA	N	A	0.976	0.976	Unknown
BARC_1.01_Gm01_31392958_A_G	Gm01	31392958	A	G	CGCCGCAGTTTGTGCCTCTGTTTGCGCATTCCTGTCAATTCCTACACTGTTGTCGCGTTC[A/G]CCTTCACCGTAAGTCCCTCTTTTCCACTCCTTGATTGAAAATGAGATTACATAGCCATTA	Y	C	0.976	0.75152	Y		0.083	0.011	0.0473684	0.198	0.098
BARC_1.01_Gm01_31426148_T_C	Gm01	31426148	T	C	CATGGACAATTCGACACGATCTCCCTCGTGTCACCTCTTTCTTCGGGTTCACCTTTGACT[T/C]GGGCTCCAACATCGAGAGGGATATCTTGTGAAGGACCCACAGTAACAGTGCTACTATGAG	Y	B	0.949	0.78767	Y		0.115	0.01	0.0625	0.206	0.11
BARC_1.01_Gm01_31447240_A_G	Gm01	31447240	A	G	AATTGGCATCACAGATTGAAGAGAGAGAGAGAGAGGGTCAGGGTTTTAACACATGTCATC[A/G]TCTAATTGGCTAATCTTCCAACTTATGTGTCTCGTCATAAGACACGTAGGTTTGGATTCA	Y	A	1	1	Y		0.458	0.446	0.452128	0.021	0.372
BARC_1.01_Gm01_31506268_T_C	Gm01	31506268	T	C	AGATAAATGTTAAATAACATTTATATCCTTCAGATTGGTCGTCCTTTCTCCTCAAAGTCG[T/C]AGTCGTAGTTGCAACTGCCACTATCTTGCAACAATGAAATTGACGATGAAGCTGGCAAGC	Y	B	1	0.83	Y		0.463	0.44	0.451613	0.018	0.371
BARC_1.01_Gm01_31610841_A_G	Gm01	31610841	A	G	CATGCAGTTGCGAAACCGCGTGGTTTAATTATGGAGAATATTTTTTTCCGATAACCGCAC[A/G]GAATCTAACAAGTTGTTCAATCATGAGAAAAATCCACTTCCCAACACTTGTGACTGGTAT	Y	B	1	0.83	Y		0.458	0.438	0.447368	0.042	0.384
BARC_1.01_Gm01_31700541_A_G	Gm01	31700541	A	G	TCCAACCCGTGCTTCAGCTCTACTTCTACTTTCTTTTTTCCCATTTCCCGGCATTTTTTA[A/G]ATTTCAATTTAAAAAATCACTCATTGAGGTACCTAGCTCTGCACATCCAGACCTATGAGG	N	B	0.988	0.82004	Unknown
BARC_1.01_Gm01_31770743_C_T	Gm01	31770743	C	T	TACGGTTTCGCGATTTTCTCCAAATTTCATTTTCAAATTCAATAGACTAGGCTATGACAA[C/T]GCTAGGTTGTAGGCCTCGGAGGTCACGTCATTGAAGCTCATCTTCAAAGACCCGCGCTGA	Y	B	0.75	0.6225	Y		0.214	0.437	0.320856	0.01	0.223
BARC_1.01_Gm01_31830432_T_C	Gm01	31830432	T	C	AAAGGGTAAAGAGAAAAGAAATGTCTTTTGAACAACCAACCTCACATAAGGATTCTAGCT[T/C]GCCCAATTAGAGCAGATGGATATTCTCGGACGGGGAAAAGTGACCCAAGTAGTGTATATT	N	A	0.976	0.976	Unknown
BARC_1.01_Gm01_31859424_G_A	Gm01	31859424	G	A	TGGAGTCTGCACTCCTCTACCGCATTAATCGGTGCCCTTCCATGACTGGCAAGAGGGTTT[G/A]TCTTTACATTTGGACTGTCCTCTTGGAACATTAGCCAACCTGCGTCGATCAAACTTTGGA	Y	A	0.799	0.799	Y		0.333	0.467	0.397849	0.01	0.269
BARC_1.01_Gm01_31906055_A_G	Gm01	31906055	A	G	CCGAACATGCAAAAAGTCAAATATGAACCTTGAAATGCTTAGGTCAGTTTCATCCTTATT[A/G]ACACGTTTGAGCCCGAACCTGCCCAAACTCAACTAATGCTTAGCCCTGTATGAGAGCACA	Y	B	0.976	0.81008	Y		0.163	0.474	0.320442	0	0.232
BARC_1.01_Gm01_31956977_A_C	Gm01	31956977	A	C	GGAAAACTGAAAACGACACACTCTTCACGTAACGACACACTTCGTGAATACGACACACAC[A/C]CGACAACGACAACGACATCCTCGACCACGTGGCTTCGGGAATGTGACATGAAACGCAAAA	Y	C	1	0.77	Y		0.137	0	0.0680628	0.032	0.056
BARC_1.01_Gm01_32003596_A_C	Gm01	32003596	A	C	CGGTTTGAAACTCTCTTGTGACTCAGGCTAATCATCGTGAGGGGGGAGGGGGGGAGTTGC[A/C]TGTGCACGACAGGGTGACCTCGACACTTACTGCCTAGTTTTCCTAAGTGAGAGTGTCGCA	Y	C	0.537	0.41349	Y		0.167	0.01	0.0885417	0.052	0.375
BARC_1.01_Gm01_32070134_C_T	Gm01	32070134	C	T	GAGCAGAGGCATGAAACATTTGCCATACCAAGAGTATGTTCGCCAAAGGGAAAAGAAATG[C/T]TGCTTCCAATGTGAGAAGCCATTTGGTCCTCTCAATAATGTCCTGAAAGAAAGTTTCGGC	Y	C	1	0.77	Y	Intron	0.266	0.042	0.152632	0.031	0.114
BARC_1.01_Gm01_32095213_G_A	Gm01	32095213	G	A	TAAGGTTGGCATCTAGACGAGGAAATAATCCCTCTGTCAGTTTTGATCAGCACTAGTTCA[G/A]CTCCAAGTGATTTCAACCACTTATCCAAGTGGGCAAGAGACTGCTTCAGCCACCACCTCG	N	C	0.9	0.693	Unknown
BARC_1.01_Gm01_32144754_T_C	Gm01	32144754	T	C	CAATATGAGAAGTAAGAAAGCAAATATGAAAAAATTTTAAAACAAAAACATCAAAGAAAA[T/C]AGAGACAACGACTAAGCCGCACTGAATCTATTAAAGGAAAGAAGAGAAGAAACTGAAGCG	Y	B	0.9	0.747	Y		0.411	0.112	0.260638	0.021	0.5
BARC_1.01_Gm01_32203361_A_C	Gm01	32203361	A	C	TGGAAGAAGGGCCAGTTGGGTTGAGTTGCGTTTGGTGTTGGCCTTGTTGGAACCGCGTTT[A/C]ACTCGCACTTGCCCTGTGCACGTGCCCTTGGGGGAAGAGGGTTCCTGGGATTTGGGTTTT	Y	C	0.915	0.70455	Y	Intron	0.151	0	0.0732984	0.181	0.111
BARC_1.01_Gm01_32259879_A_G	Gm01	32259879	A	G	ACTCCATCACTGCTAGCATTGCAATCTCTCGGTGCTGCAACATCACTGTCGTTATCACTC[A/G]CGGCGCGCTGCAACCACACTGTCACTCTCGAGGTTCTGCAACTGTCGATCATGAAAGGTT	Y	B	0.839	0.69637	Y		0.379	0.037	0.203209	0.352	0.258
BARC_1.01_Gm01_32289085_G_A	Gm01	32289085	G	A	GCAGGTGGAGAGGAGCATGGAGACGGGGAGGTTTGAGGCGAAGACGACGGCGTTGCTGCT[G/A]CAGACGCTGCATTACTCCGACTTGGAGAAGGCGGAGGCGGCCATTGTGGAGGTGTTGGTG	N	B	0.59	0.4897	Unknown	CDS
BARC_1.01_Gm01_32331261_T_C	Gm01	32331261	T	C	GTGGCCTTTGTGAACATTATTCTGCCTAACATCACTGAAGAGGACTTGATGCAATACTTC[T/C]AATCCGCCACTTCATCTTTGCTAATTGCTCCATCAGACGGTTCTCCCACAGATGACCACT	Y	B	0.996	0.82668	Y		0.281	0.042	0.154255	0.12	0.151
BARC_1.01_Gm01_32354171_C_A	Gm01	32354171	C	A	CCTTGACAATAGTCCTTTTTCTATTGTAGTGGCCCTTGTAAGGTGAACTATGGCAATGCC[C/A]CAATATGCTTCTTGCCTCCCCCTGAGTTACACACCTCCTGAGGAGATTGTTTGCTTCAAT	Y	C	0.9	0.693	Y		0.2	0.07	0.123457	0.029	0.44
BARC_1.01_Gm01_32448938_G_A	Gm01	32448938	G	A	TCATGTACTCTACCTGGCTCGCCAACATTGTCATGGTCAAAAAGGCCAACGACAAATGGC[G/A]AATGTGCACCGACTATACCAACCTTCATAGGGCATGACCCAAGGATGCATACCCTTTGCC	Y	B	0.996	0.82668	Y		0.292	0.047	0.167539	0.118	0.153
BARC_1.01_Gm01_32493455_G_A	Gm01	32493455	G	A	CAAATTTGATTGAGTTGAGTCCTAAATTTAATCAAAATCGGTCTAAATCGGCTCGCGAAC[G/A]CCCCTAGAAGGTGGTAGTGTATGGTGGGGCTGTCACCATGGCCACCATCATTGGTTGTGG	Y	C	0.834	0.64218	Y		0.279	0.038	0.155914	0.32	0.216
BARC_1.01_Gm01_32543389_C_T	Gm01	32543389	C	T	ACTCATGACCTCTCTCGTTGGCGATGGCATTGAACGCCCTAGTGAGGCGGCATATTTCTC[C/T]GGCTCTAACGAGGCTTATGAAACATAAGAGAAATACAGTTAGGTTGGGAGTGTGAAAGAG	Y	C	0.915	0.70455	Y		0.292	0.047	0.167539	0.031	0.124
BARC_1.01_Gm01_32564014_C_T	Gm01	32564014	C	T	AGTAATGATATCGGCATGGAGGATGCACCATTGCCTGTCGCCGTAGCGAGGAAGTGAAAT[C/T]TAGAATCCTGGCAGGCTCCGACTTGAGGTAAGGATTGACAAGAAGAAGTGCAGATTGTCG	Y	B	0.996	0.82668	Y		0.281	0.032	0.154255	0.282	0.201
BARC_1.01_Gm01_32591795_G_A	Gm01	32591795	G	A	TGAGTGGCATTTTAATCCATTAACTTGCATGCAAGGTCTACAATTGTGACCAAGAGTTGC[G/A]CCTCATCTTCTATTTTGATTGTTGTGCATTAATGAATAAGAAACAACAATAGAGTATGTC	Y	C	0.889	0.68453	Y		0.302	0.037	0.164894	0.032	0.128
BARC_1.01_Gm01_32683433_G_A	Gm01	32683433	G	A	CAAGACGTGTCCATGCAAGAAGAAAGCAAATTGTAACAACAAGGCATGAATCAAGCTAAA[G/A]CTTAGTTGCACAATGTAAAATAGGATCAAAGGATCATAAAAGGAACTGAGAGAGCCGTAG	Y	A	0.868	0.868	Y		0.302	0.042	0.164894	0.052	0.135
BARC_1.01_Gm01_32717386_A_C	Gm01	32717386	A	C	AATGTTAACCATAATTCAGCCAATAAGCAACTGGGTGGGGTTTTTCCCTAAGCCTTTAAC[A/C]ATCGACACTAACAATATGCCCACAATTATTGGCATTTTGTTTACCCTTACCGCGGGGAGG	Y	C	1	0.77	Y		0.176	0	0.0745342	0.275	0.147
BARC_1.01_Gm01_32752956_C_T	Gm01	32752956	C	T	ACTAACAAAAAATACATCAAAACCTTGGAATTGAACACTTTTATGAAGCTTCTAAAAGTG[C/T]TCATCGAGGAAAACAAAAATCAAGGATGAGAGGGGAAAGAGGAGGGTCTCTTACCACTGA	Y	C	0.589	0.45353	Y		0.427	0.033	0.231183	0.301	0.258
BARC_1.01_Gm01_32804455_C_T	Gm01	32804455	C	T	CCATTTCTGCCGTCGCCGCAGCTTCTCCAACCTCACCGCCCCTCCACCTGCAATATATTC[C/T]CCATTTTGCATCTCAACAATCACTCTTATTACCACTCCATAACATATAGTGGAGCCTTCA	Y	C	0.718	0.55286	N
BARC_1.01_Gm01_32846138_A_G	Gm01	32846138	A	G	GAGAGAGGCAAGTGAATATCTAGTAGTGGCGCAGGGGCCGAACGCGTTAGCAACACCGCT[A/G]TGCCAGATGACGCTGCCGTAGGGGGACCGTGTTGCAGTGGTCGTGGCCGTGGCGGTAGTG	Y	A	0.789	0.789	Y		0.437	0.101	0.26738	0.021	0.495
BARC_1.01_Gm01_32873097_T_C	Gm01	32873097	T	C	GGTATGCATTGTGATGAGTAATATTGATGAATTTGGTAAAGATTTAGAAAGAGAGGGATT[T/C]GAACCCTCGGTAAACAAAATGCTCTAACATCTTTAGGTCCTCCTCGATCTCATCCCCTGA	Y	A	0.8	0.8	N
BARC_1.01_Gm01_32899706_A_G	Gm01	32899706	A	G	TGTATGGGGTTGTGGCGGAAGAAACAGGGGAAGGTTGATTCGTCTCCAATTGTGCCATGC[A/G]GTGGAGAAGGTCGTTGATCTTTGTAGACATGTTGATCTGGGAGGAGGTGAGTCTAGCAAT	Y	B	0.996	0.82668	Y		0.443	0.101	0.271277	0.021	0.493
BARC_1.01_Gm01_33025697_G_A	Gm01	33025697	G	A	GATTGTGATTTGCCCGACCATGTCCTCCGAGACTGTGTGCAGCTCCAAGGAGGAGTCCAA[G/A]CCAAGGTCGCGAATATGGGATTGCATGCTGAGAAGACGCTCTGCTTCGGCGTGCGTTGCA	Y	C	0.877	0.67529	N
BARC_1.01_Gm01_33106006_G_A	Gm01	33106006	G	A	GATTGCCAAGCATTTGAGCAATCTCTTGAACAAAGAAGTTTCATTTCATTTTGATGATTT[G/A]TGTTTAGAAGCTTTTGACACTTTGAAACAAAAACTGATTTCTGCACCTGTAGTCACTGCC	Y	D	0.512	0.34304	N
BARC_1.01_Gm01_33167239_C_A	Gm01	33167239	C	A	TTTGTAATTATGGGAAACTTAAACAAAGACGGGTTTGCTAAAGGATCGTCTTTGTTTAAG[C/A]AACCCTAATTTAACTCGCAGGTGTGCATGCTGTCGGGGTCATCACTACTGAAACTTGCGC	Y	B	0.976	0.81008	N
BARC_1.01_Gm01_33245645_G_A	Gm01	33245645	G	A	ACCTCGGGAGCATGCTCAAGGTGACTTCAACCCATACTCCCCTTTCACCACTGAGGGACC[G/A]GCATTTAATGCTATGCCTCGACCCAATATTGTGGGAGCTCCTCAACCCCGCCCTCTACAA	Y	C	0.514	0.39578	N
BARC_1.01_Gm01_33287153_T_C	Gm01	33287153	T	C	TATTGCTCTTATTAGGCGCTGATAAAACCTGGTGTCTCTGGTGCCTAGAAGAGAGATTTG[T/C]CGTTGGATTCAGGGTGATACGACGTACTCATTCTCAGGTGAAAATGTTCTTGCCAGGACT	Y	B	1	0.83	Y		0.111	0.016	0.0486486	0.253	0.303
BARC_1.01_Gm01_33316390_C_A	Gm01	33316390	C	A	AACTCCATGACTATCTCAGGGTTATACTTAGCCATGGGCTCCGTCGGCTGGGTCCAATGC[C/A]TTCTGGCAACCTCTGCCTGGAATTTTGCATACTTTCCCTCTGCTAGTTGGACCCGTCTTT	Y	C	0.681	0.52437	N
BARC_1.01_Gm01_33425932_G_A	Gm01	33425932	G	A	CGTTCAATGGCCCTCATCCTTTCCTCTATATGATCAAATTTTCCCCTTTCTTCCATGGCC[G/A]GAGGCAGTCTTCCCACCGCAAAATGCAAGGGTCATGGTTGTGGGCGATACTGAGGGCCCC	Y	C	0.436	0.33572	Y		0	0		0.14	0.045
BARC_1.01_Gm01_33447172_A_C	Gm01	33447172	A	C	TTTCTGCTTAGTGAGATGAGCTTGCTAAGCGAGATCTGTAGATTATAAAGACATCCAAAA[A/C]CATAAAATTACACATTTTCAGCTCCCTCTCAAAAATTTCTGCACTAACTCCTCCTCCTCC	Y	C	0.841	0.64757	Y		0	0		0.021	0.007
BARC_1.01_Gm01_33531622_C_T	Gm01	33531622	C	T	CAGAGGACTACACGTCCTTGCCTTCACAGGACTACATGTCCTTGCCTTTAGAGGACAACA[C/T]GCCCTCGCCTTTAGAGGACTGTACATCCTCGTTTTTAGAGGCCTACACGCCCTCGCCTTT	Y	C	0.413	0.31801	N
BARC_1.01_Gm01_33562690_A_G	Gm01	33562690	A	G	AAGTTGCATTTCAATGATGAGGGCGGAAGTGGAGACCGGAAGTCGCGCCATGTTTTAGGC[A/G]TAGAGGTAGTCGTTGAGGTCAATGAGGAGAGAGGGCTTAATTGAGATTAGTTTTAGTTTG	Y	C	1	0.77	Y		0.141	0	0.0680628	0.447	0.19
BARC_1.01_Gm01_33860533_T_C	Gm01	33860533	T	C	GTGATGTCTCTCAGTAGGACAACAACACACAGACCGCACTCCATCTTTCTTCCCAACGAG[T/C]CCTTATTTGTTTTGGATTTGGAAAACTGCAGAGGAGAAAGAAATAGGGGTCTCCATGTGT	N	B	0.988	0.82004	Unknown
BARC_1.01_Gm01_33891376_A_G	Gm01	33891376	A	G	AAGGCAACTTTTTTTTCAAAGCAAATCACTCCTCGTGATGGCACCTCCCCCCTGCAACGC[A/G]CAACCTCTAGTGGCACGTCCCTGTTGCAGCCTGCACTTCACTCTGGGCTACGTTGCTACA	Y	B	0.834	0.69222	Y		0.443	0.109	0.271277	0.073	0.497
BARC_1.01_Gm01_33914458_G_A	Gm01	33914458	G	A	CGAGGTCACGACAGAGGGAACGAGGTGACAACGGAGCTTATGGCACAACGGAGGGAATGA[G/A]GTGAAAATGCAGACGTACGTTCAGCAACAAGCTTAAGGCGTAGTTCTCACGTTCAACAAG	N	C	0.768	0.59136	Unknown
BARC_1.01_Gm01_33937271_A_C	Gm01	33937271	A	C	ACGGAGCAGTTCTGGGAGTGTATTCAGAGGTGTAGTCTTGTTGATATGCGGTTTAGTGGG[A/C]AACTTTTCATCTGGGTAACATCAGCTCCACTATGAATACTTATTGGGTTGTGGCAGGTGA	N	C	1	0.77	Unknown
BARC_1.01_Gm01_33963764_A_G	Gm01	33963764	A	G	CAAAGTGTGACCTCTCGCACTGAGCGAGTTACCTCTCGCTTTGGGATTTTCTCTGAGTGC[A/G]GCCTCTCGGGCTAAGTAAATTTCCCCTCGGGTTGGGAATTATGCTGACATCGCCTTTCAC	Y	C	0.976	0.75152	Y		0.146	0	0.0729167	0.326	0.157
BARC_1.01_Gm01_34016842_T_G	Gm01	34016842	T	G	TGTCTTCAAAGCTTCTGGTATTTATAGGTCTACATCAACAAGTGTCCATTGTCTCTAAAC[T/G]AATGGATTTCTTTACTTTAGCTTTGTACAAAGAATGTGGTTATTGGAGCATTTAATGCTT	Y	A	0.899	0.899	Y		0.426	0.112	0.26738	0.042	0.499
BARC_1.01_Gm01_34062014_G_A	Gm01	34062014	G	A	CCCGAGTTAACCTATAATTACAAACAAATCCAATATCTCATATTGGCCAATTTCTGCATG[G/A]CCACACATATAGCGCATCTCACTTCATCGAGAGACCCATAGACATAAGTCATGCTATGTA	Y	B	1	0.83	Y		0.26	0.111	0.177419	0.397	0.26
BARC_1.01_Gm01_34093710_A_G	Gm01	34093710	A	G	CCAAGAAGTTACGAGTTTTTTTTCTACCCCCCTCACCACCACATATAGAAATTATTGTGC[A/G]TCAAATAACATCAAAAGTATTGGTTTCGGAAGATAGAATTTCTAATGTTTATTTTGCATG	Y	B	1	0.83	N
BARC_1.01_Gm01_34147853_G_A	Gm01	34147853	G	A	AAGTGCTCTTTTTTCCTTCCAAAAAGGGCCCTAACAGCTAAGTCTGATCTTGAAAGTCCA[G/A]TATGCACCAAAAAAAAAGCTTTATTTAGTACCAAAGATCAAGTAAAAATGGCTCATGCAA	Y	C	0.842	0.64834	Y		0	0.005	0.002	0.055	0.021
BARC_1.01_Gm01_34206742_C_T	Gm01	34206742	C	T	CTTTCCCTAGAACTATCTTCTCTCTTATCACTTCTTCATATTTGCTTCCGTCGCGGACTT[C/T]CGTACGACCAAGTGGTAGAACTGGCGTGCGTAATCTGATGTCGTGGAGGATGTTGTAGAC	N	C	1	0.77	Unknown
BARC_1.01_Gm01_34300728_A_G	Gm01	34300728	A	G	CACTCCGAGGTAACCAAGGGGACTGCATGGGATGCGGATCCAGATTCCCTGCAGTCGGGA[A/G]ATCCCCACATTCAAGCATTCAAATTATCGTAGCCGATCGAAACCACTCATAATTTATCTC	Y	B	1	0.83	Y		0.104	0	0.0520833	0.182	0.095
BARC_1.01_Gm01_34327255_C_T	Gm01	34327255	C	T	GGTCTGGTGAGGTCCTATTTCACTTTCTAGTCTCTCCTTCCCAAAGTATTTCTTTCTGTG[C/T]GCACGTATATGATAACTTGAATGCAAAACCAAGGAACCAAAATAACACAAAGCAATTCCA	N	C	1	0.77	Unknown
BARC_1.01_Gm01_34352800_T_C	Gm01	34352800	T	C	TGGATCAACTTGTTCGCTTCCTCGACAATGTCGACAATGGAGTAACCGCCACGGGATGGC[T/C]ATGGAATAGAGAGAAGGGATTGGGAGGAGGCAAGGCGGAGATTCTGGAGAGGTAGTGGGG	Y	C	0.949	0.73073	Y		0.084	0	0.0418848	0.423	0.168
BARC_1.01_Gm01_34405116_C_T	Gm01	34405116	C	T	AGGGAGTGCGAGACATGCGTTCATGGGTGAGGGGTCAATGGATTCCCTTTGAGCAGATGC[C/T]CTCAGCCAGTTCCTGGGTGACCCGCTAGTTTTGGAGGAAGCCTAGCAGTGTGAGTTCAGC	Y	C	0.414	0.31878	N
BARC_1.01_Gm01_34449047_G_A	Gm01	34449047	G	A	CCCACATCAATCAAGCTCTATACCTTGTTGAAGGCCATGCATTACTCGATAGAATGCCCC[G/A]GAACACCCTCGTGATAGGCGCAGGTTGCATTTGGATTGTACCATCGGGGGAAGGGAGACT	Y	C	0.842	0.64834	Y		0	0		0.105	0.034
BARC_1.01_Gm01_34475397_A_G	Gm01	34475397	A	G	GGGTAGTACTTCGCCAAACCAACACAACCAACCCAAGATAGCTTATTGGCATACCGGACT[A/G]GGCGGGGGTGTGTTCGTAGCGCACCCAATCCCCACCAACAAATTAGGGACGCATGCGATG	Y	B	0.996	0.82668	Y		0	0		0.398	0.128
BARC_1.01_Gm01_34501160_C_T	Gm01	34501160	C	T	TCGTTTGAGGTGCGATTCGATAGAACGGGGCGTTGCTTTTATTTTTTTTGGGTTCCTTAA[C/T]GTGCAAACATGCCAAATAGCGGCCCTGTACAGCCTCAAGCGGCTCCCACATAATTTTAAA	N	C	0.426	0.32802	Unknown
BARC_1.01_Gm01_34560330_T_C	Gm01	34560330	T	C	CCCAGGTGTGGGCACTGCTTGGTGTTTACGGGAGGCCATCTGAAAAAAACAAAAAAAAAA[T/C]AGCAGAACATACTGCAGTTAGTAAACATGGGGGTGCAAAAAGTAAGCAAAATAGGGGTGA	Y	B	0.498	0.41334	Y		0.229	0.337	0.282723	0.201	0.255
BARC_1.01_Gm01_34634278_A_G	Gm01	34634278	A	G	AACCAAATACGGCTTCTTTGTCGCGAGGTATTGAGAATATGAAATAACGATGGCGTCGCA[A/G]CAGAACACGGGTTGAGGTGGAGACGATGTTGCAGCCGAATGCGGGTGAGGTGGTGACAAC	N	C	0.787	0.60599	Unknown
BARC_1.01_Gm01_34668255_T_C	Gm01	34668255	T	C	AGATGGAGCTTTCGGAGAAGTTAGAGGCCAAATCCACAACATTGGAGCTCAAATCCGCAA[T/C]GTTGGTGACCAGATCTACGCCTCCTCTACCCAGATCTGCAACTTTTGTGGGGCTATGAGT	Y	B	1	0.83	Y		0.083	0.141	0.111702	0.371	0.291
BARC_1.01_Gm01_34717620_T_C	Gm01	34717620	T	C	CCAGGTTCCGCGTACTCCTTCTTCTTTACCAGGAGCACCGATGAAGAGAAAGGGATGTGA[T/C]TGGGTTATATGAGGCCAGCCGCGAGCATAGAAGCTATCTACCTTTTGAGTTCCGACTTTT	Y	D	0.996	0.66732	Y		0.053	0.298	0.171123	0.137	0.164
BARC_1.01_Gm01_34740832_G_A	Gm01	34740832	G	A	GTGCAAGAAAACCCCTAGTAGCATGGACTAGTTGCGTGAACGAACCAAAGGCTACATCCA[G/A]ATGAAAGAAATGTCCAGGTTCAAGAACGAGGTCAGGCAAGTTGAATAAAAGGAACAAGCT	Y	C	0.791	0.60907	Y		0	0		0.031	0.01
BARC_1.01_Gm01_34771835_C_T	Gm01	34771835	C	T	GGCCTGGGGTTTCCGGCGCTGATCATGGGCCTCTGCCAGTCATTCGGGGTTCCCGTCACC[C/T]CCAGTAAAGTGATCCGATCGTCGATCACCCAGGCCTTCATCGAGAAGTACTGAACGCCTA	Y	C	0.414	0.31878	Y		0.083	0	0.0418848	0.126	0.07
BARC_1.01_Gm01_34800484_T_G	Gm01	34800484	T	G	TGGAAACTGCTAAATTTGCCTGACCAAATATAGGCCTAACTAGTGTTTTAAAAATTGGCA[T/G]GACTCAATCAATCGAACCATGAAATTGATCTCCTGGGTGGTTTAAGTCACTCATCAGATT	Y	B	1	0.83	N
BARC_1.01_Gm01_34843208_G_T	Gm01	34843208	G	T	TGATCTCATGTTCATAATAATTGTTTATTGGTCGATCATAATAATTGTTTATTGGTCGAT[G/T]TCGAGACATAGGTCCCAATTTTAGGATTCTCTTGGCTATTACAATCGAAGTAATGCACAT	Y	B	1	0.83	Y		0.135	0.16	0.147368	0.042	0.42
BARC_1.01_Gm01_34868510_T_C	Gm01	34868510	T	C	TCACCCGCATCTCCACTAAAGTTGTGAGTAGCTGGAAGTGGAGCTAAGTCCAGAGGACTC[T/C]CCCCCCGAATTTTCGGTGCGGCGGTTAGGCATCCTTAGACGAAAGAGTGGTCTTTCAGGA	Y	B	0.421	0.34943	N
BARC_1.01_Gm01_34902717_A_G	Gm01	34902717	A	G	ACCGCCACCACCTCAGCAGGCCGATTCGGCTAGGTCATTGGGCGTGGAGTGGTATCTACA[A/G]CATTTGGTTCGCCAGCAGGCGGCCAACCACCATGGAAAGGTGCAGATACATGAGTGTCTC	Y	C	0.493	0.37961	Y		0.135	0.177	0.15625	0	0.156
BARC_1.01_Gm01_34928567_T_C	Gm01	34928567	T	C	CTCAATCTTGCAAACCCACCCTCATCACTGCCATTGTCTCTGACCCTGTACGCTCAGTCT[T/C]GCAAACCCACCCTCAGGCCATCGTCGTGCTCTAGTTGTGTCTGCCATCACGCTTACAATC	Y	C	0.567	0.43659	Y		0.117	0.141	0.129032	0	0.129
BARC_1.01_Gm01_34975779_G_A	Gm01	34975779	G	A	CCAATCATTCCAAAGACACTGAGCTTGATATCATTATGCCTCAACTCCAATTCTGCTGTC[G/A]ATCATTGACATAGTGATCCCAAACACACCGAGCTTTTAATTAATTTCACATTTGATATAC	Y	B	0.718	0.59594	Y		0.052	0.161	0.10582	0.211	0.326
BARC_1.01_Gm01_35048367_A_G	Gm01	35048367	A	G	TTCCTCCACCTCCACCTTCACCTCCTCCTTCTTCAGCCCCGGCAAGTCCGCCTTGAACAC[A/G]TGCGACTCCGGGGTTTCCTTCCAGTCCACACGTGCGTTCACGAAGGCGGAAACCTCGCTG	Y	B	0.62	0.5146	Y	CDS	0.126	0.151	0.138298	0.074	0.401
BARC_1.01_Gm01_35080457_A_G	Gm01	35080457	A	G	TCTTCATGCGTTAAGAGAATCATAGCTTGCACTAAGCGCCTGAACCCCTATTTATTGGCT[A/G]ATAGGTTCCCGCTAAGCACGAGCCCCATGCGCTAAGCCCAAAAACCTCTCTGTGATTTCA	Y	B	0.8	0.664	Y		0	0.161	0.0793651	0.043	0.067
BARC_1.01_Gm01_35151660_A_C	Gm01	35151660	A	C	GTGTTTATGGATGTTTGTGTTATCATATCTTACAACTATGAGGATCGAGGAAAAGGAAAC[A/C]TTTCGTCATGGGATTGTACGTGACTAGTAACAATGGATGATATCAATACGAAAATGCACG	Y	B	0.988	0.82004	Y		0	0.183	0.0899471	0.021	0.067
BARC_1.01_Gm01_35216975_A_G	Gm01	35216975	A	G	AGAACTTGAAATGCGAGGAAGAGGAAGCATGAGGAATAGGATGTATTGACAAACTTACCT[A/G]CTAACGAACCAAACATGGCAAAGAGACAAAGAGGTGCGAGGAGGGGAACATGCAAGGAGG	Y	B	1	0.83	Y		0.135	0	0.0677083	0.456	0.197
BARC_1.01_Gm01_35242436_A_G	Gm01	35242436	A	G	TGTCTTCATCATATTCTTTTGAACACCCCGGACAACGTGCCAAGGCCACCTTATACTGAT[A/G]AGGATTCTGAGCATACAGTGACAACCTTGCTTGCCCCACACCCATTAAGTAGGATGATGA	Y	B	1	0.83	Y	Intron	0.135	0	0.0677083	0.421	0.235
BARC_1.01_Gm01_35273844_G_T	Gm01	35273844	G	T	AAGTTGTCGAGGTTCAAATCAATTGTCTCACGGTGGCTAGGCTGGCACGAAGACCGAAAA[G/T]CTGACATTGAAGTCAACCGAGATGGAGACATGTCAGATGTCTTGCTTTAAAGGAAAGAGA	N	B	0.976	0.81008	Unknown
BARC_1.01_Gm01_35308139_C_T	Gm01	35308139	C	T	TCTCCCAAATCACCCAACTCTTCACCAACACAGCCTCACTGTGGAAGAATTTGTCACCCT[C/T]AGTGGGGCCCACACTGTTGGATAATGTGCCAACTGCAAACACTATTATTACTACCGAGCA	Y	C	0.976	0.75152	Y		0.115	0	0.0572917	0.349	0.155
BARC_1.01_Gm01_35333291_G_T	Gm01	35333291	G	T	TCTCTCTCGACCTCTCTCTTTCTCTGACTCTCTCAAAAATTTGTAGTTTTGCACCCATGA[G/T]CTACTACGTGAGCCACCATTGTCGCAAATCTGAACTTGAGCCTGCCGCAATTAGCCACCA	Y	B	1	0.83	Y		0.115	0	0.0572917	0.341	0.152
BARC_1.01_Gm01_35389637_G_A	Gm01	35389637	G	A	AAATTTTTCTTCCTTTGACTCTTCTTTCTATTCTCTTAGTCTTTCATGATGGCTAAGGTT[G/A]AGAGAATATTCTAATGTCAGAAAAGGGATCTTATCTCACGTTAGTGGGTATAAATCCTTT	Y	D	0.608	0.40736	Y		0.135	0.196	0.164894	0.083	0.419
BARC_1.01_Gm01_35411559_G_A	Gm01	35411559	G	A	ATTAGAGCATGGTTGTAGTCTTCATCTAAAGTAAACAAAACTTGATAATAATCCCTTGGG[G/A]CGTCGATGATCTTAATAGCACCCTTTTTAGCCCAATCATGTTTTAATTTTGCTTCCAACA	Y	B	0.935	0.77605	Y		0	0.191	0.0947368	0.01	0.066
BARC_1.01_Gm01_35448254_C_T	Gm01	35448254	C	T	GGCCCCAACAAGATTGTATGCAGAGGGAATCCAAATGTTGATACGAAAGAAGTTCAGAAA[C/T]AACTTCCATACTTGTTAAGTCGACATTGCCTCTCTGAGACAATATCGACTCAGGGTCATC	Y	B	0.812	0.67396	Y		0.135	0.188	0.157895	0.042	0.427
BARC_1.01_Gm01_35472568_C_T	Gm01	35472568	C	T	AAAAATGAAGTGTAAGTGCAAGTGACAAACGAGGAATTGGCGAGAATCAGGCCAAGCAAA[C/T]TTGTTGAAACGTTGATGGCGATCCACTGTCCATTATCAAGTTTTCCTTTGTAAACAACAT	Y	C	0.9	0.693	Y	Intron	0.135	0.172	0.153439	0.073	0.414
BARC_1.01_Gm01_35496161_T_C	Gm01	35496161	T	C	TGCCAATACAATCTTGACCTACACTGCCAACAATTTTCTATTCGCCATGTTACAGTCAGA[T/C]ATGGCAAGAAAATCCGTACCCGTGGATACCCGCCCAAATCCGTCCCAACTTTGACGGGTA	Y	B	1	0.83	Y		0	0.181	0.0894737	0.045	0.075
BARC_1.01_Gm01_35522185_A_C	Gm01	35522185	A	C	ATCATCTTAAGATGTAACTTGGTGACATTTTTATAATTAGGGGGGATGAATTTTGTTTTT[A/C]TGACACACATTCTAAGACAGTTTTACAGAACCGTCTTAGAATGTACGATTGTGACATTTC	Y	B	0.687	0.57021	Y		0.125	0.194	0.15873	0.034	0.434
BARC_1.01_Gm01_35559579_T_G	Gm01	35559579	T	G	ATAAGGCAATGTGAACAAAAATAAATTTTGTGGCAAAGTCTAGTAATTTTAGGTTTTTTT[T/G]TGTGTGTGTGTGTATATATATATTATAACCAAACTTGATTACATAAACTAATTAGTTCCT	N	B	0.643	0.53369	Unknown
BARC_1.01_Gm01_35587217_G_T	Gm01	35587217	G	T	TTGGTAATTATAAAAATAAGAAATAAAGACGGTGATGTAGAAACCCGTCTTTGAATTAGT[G/T]AATCATATATTCGACAACGTTTGTGTTGTCAGCACTGACGTGGTTGGCGCAGCATTAGAC	Y	B	1	0.83	Y		0.135	0.172	0.153439	0.197	0.372
BARC_1.01_Gm01_35617435_C_T	Gm01	35617435	C	T	TTTTAAGGGTGAGACTACATATGATGTTGCTGTGAAGAAAGGACACGCGCACGTGTTTGA[C/T]GCGCTGAGGCTGGAGGATGGGTTGTGTGTGGTGGCGAGGAAAAGGGAGGTGAGGAGTATC	Y	B	1	0.83	Y		0.089	0.214	0.144385	0.303	0.205
BARC_1.01_Gm01_35662381_G_T	Gm01	35662381	G	T	TTTTTTCTCTTCTCCAACGACAATCACCACCATCGTCAACCGTGCCATCTAACCTCTCAT[G/T]TTCCTCTAGAAACCTCTTCCGCACCACAATGGAATTTTCCTGCTTCTCTAGCAAAAAACA	Y	B	0.976	0.81008	Y		0.084	0.205	0.142857	0.328	0.333
BARC_1.01_Gm01_35683957_G_A	Gm01	35683957	G	A	TCAATAATCTTAATAATAGTTATATGCTTATTTTTAAATAATAAAATTACTTATTGATAA[G/A]TTGTTGGTCCTAATGATCTTGAAAAGTAAGATCTTGTGTTGTGAATGAATAAATAAGGTT	Y	B	0.899	0.74617	Y		0.108	0.209	0.163636	0.486	0.299
BARC_1.01_Gm01_35705337_C_T	Gm01	35705337	C	T	AAAATTAAAATAAAAAAATCTTTATAATGTATCGATCTTCTATTCTGACTTCCCCAAACC[C/T]TCTAGTAGCCAACCGAGACAATGATGGGTTCGTTGCCCTAGCTAGGATGGGGCAAAAGAA	Y	C	0.858	0.66066	Y		0.094	0.183	0.137566	0.401	0.296
BARC_1.01_Gm01_35742916_T_G	Gm01	35742916	T	G	TTGTTGTGGATTTGCAAACCACATAAAGGTTTCCCTCTAAATGATTGTATTTTGAGCCAT[T/G]GTTTTTTGTACATCAGTGGGCTCTGATGATGTTTTGGTATCTCACCTTCAATTTGCTGAT	Y	D	0.842	0.56414	Y		0.083	0.193	0.136126	0.4	0.286
BARC_1.01_Gm01_35770451_T_C	Gm01	35770451	T	C	GGATATTGATCTGGAGTCTCTTACCTATCATATAGAGAAAAAAATGTCTCCATAATTTGA[T/C]GAAAAAGACATTGAAGGCATTGAAGTACCCTGTTATACCTTTGCAAGCATTGTAGTAGCT	Y	A	0.719	0.719	Y		0.083	0.198	0.140625	0.45	0.278
BARC_1.01_Gm01_35791941_A_C	Gm01	35791941	A	C	GCGCTTAGCGAGTGGTTACTAGCTTAGCGTTATCCAAGCCGCAAGGAATTTCGCTTAGCG[A/C]GAATGAGTCACGCTTAGCTCAATTAAACCAGTAATTTGGCCGCAAGGAATTGGGCTTAGC	Y	B	0.589	0.48887	Y		0.083	0.198	0.140625	0	0.141
BARC_1.01_Gm01_35840821_A_G	Gm01	35840821	A	G	CAAATAGTGTAATGTGAACCAGTCATGTAGACCTCCTCATGAAGTTCGACATGTAAAAGG[A/G]TTATTTACATCAAGTTAAAGTACATGGCAACCTTCGGCAACATAGGAGTTGAAAGCCAAT	Y	A	0.965	0.965	Y		0.125	0.179	0.148148	0.122	0.398
BARC_1.01_Gm01_35871532_G_A	Gm01	35871532	G	A	CAACCATGATAGACACCAACACTTTTTAGAAACTCTAGACACGTATTGCGGAGATGAAGC[G/A]ATGCCATGAGGAGGAACTCAAAAAGCTGAAGGTTGACCACAACTAGTTGGAGGCTCGTGT	Y	B	1	0.83	Y		0.135	0.174	0.152632	0.042	0.422
BARC_1.01_Gm01_35910954_A_C	Gm01	35910954	A	C	GGTTCATGATCACATGTTAGGGAATAGAAGCCAACCCCGCCAAATGCACAATCATACTAG[A/C]GATGCACAACCCTATCAATGTCGGAGTAGTCCAAAAACTAAACGAAAGACTAGCATCTCT	Y	A	1	1	Y		0.104	0.16	0.12766	0.221	0.163
BARC_1.01_Gm01_35950290_T_C	Gm01	35950290	T	C	TGGTACTGCTTCTCCGTGTTATGAAGGATTTTGCTAGCAAAGTAGACAGGAATTTGGTGT[T/C]TTCCCTCTTCCTAGACAAGGGCATAACCGATGGCCTCTTACGTGACTAAGATGTATAGAA	Y	A	1	1	Y		0.104	0.176	0.137566	0.211	0.164
BARC_1.01_Gm01_35989110_T_G	Gm01	35989110	T	G	GGCTATGGAGGTGTGACAATGTTTGCCTGGGAGGTGTAAAAGAGTTGAGGACCGAGGTGC[T/G]AAAGGGTTTCGGCTAGTCGCGGCGATGTAAGACCATTGTTGTTCACTGTGAAGGTGTGAC	Y	A	0.949	0.949	Y		0.125	0.163	0.143617	0.112	0.395
BARC_1.01_Gm01_36018610_G_A	Gm01	36018610	G	A	ATATAAGATGGATACCACCCATTCCTCCTTGGCACAAAGTTAATGTTGATGGTCCTTACA[G/A]AAAAGCCTCCTCATCTGCGGCCTGTAGAGGCCTGATTAGAGATCACATAGGGAGGTTTAT	Y	A	1	1	Y		0.115	0.167	0.136842	0.279	0.338
BARC_1.01_Gm01_36059989_G_A	Gm01	36059989	G	A	GTTGTTGATGTAGACAAAGAGGCAAGGGACAAGAGGGTGTGCGACAGAGTCAAGGTGGCA[G/A]CCCAGGTAGAGGTAGCAACGTCGAGGGCAACATCGCCAAAGGAAGAAGGGAAAGGGAGGA	Y	B	0.915	0.75945	Y		0.097	0.16	0.128342	0.104	0.387
BARC_1.01_Gm01_36086600_G_A	Gm01	36086600	G	A	ACTTTCTACTTGGAGTTGGTAAAAGTTTTCTACACTACTACCCATATTGATGGTGAGACT[G/A]GATATTTGTATGCTAAAGTGAAAGGGAAGACGATTGTAACAACCCCTGAGGTTTGGGAAG	Y	B	1	0.83	Y		0.094	0.163	0.126316	0.104	0.384
BARC_1.01_Gm01_36129158_A_G	Gm01	36129158	A	G	AGATACTATAGACATGGGCTTGATCGCCTATTAGGACGAGCTTCGTGTGTCTTGACTTTA[A/G]ACATGACTATGCTTGGACAAAATTAGAAGACAGAACCGAAGAGATTGAAGTTGAGCCCAT	Y	A	0.996	0.996	Y	Intron	0.094	0.158	0.121693	0.449	0.27
BARC_1.01_Gm01_36166509_T_C	Gm01	36166509	T	C	TACATCTCCAACATCACCCTCTATAACCCTTCTTTTCACTAGCGTGAATTCTCCCACCAA[T/C]CACTTCCACTACTCCAATCCTCCTCCTTCGTCGCCCCATTCTTTTTTTGAAAATGTCTTT	Y	B	1	0.83	Y		0.094	0.16	0.126316	0.497	0.249
BARC_1.01_Gm01_36230803_G_A	Gm01	36230803	G	A	AATAAACTAAATAATAATAGTAATAATAAACTAAAAAAAACAAAATATTTAATATGATAA[G/A]CAAACGGATAAAGGATGATGGTGGGTGATCCATCATGGTTGGGAGGATATTGGAGATGTC	Y	A	1	1	Y		0.115	0.168	0.141361	0.457	0.246
BARC_1.01_Gm01_36262603_G_A	Gm01	36262603	G	A	ATGGAAACTAGTGCACAACGGTCTTGCTTGATGGCTAGAAGAGGGAGCGTTGCTGCCATC[G/A]TCACAATGAGGAAAAAGAGGTGGTGAAGAGTGGTAAAAAATATAGTGGTGGTTAAAAATA	Y	B	0.988	0.82004	Y		0.115	0.158	0.132275	0.392	0.296
BARC_1.01_Gm01_36290355_G_A	Gm01	36290355	G	A	TTGACCATCCTAAGACCAAACTACTTCTTTGAAACTGGCGATGACGTTCAATATCAATGC[G/A]ACTTGTCCATCAATGTTCATGGTTTGACCTTCAAGATCGATGTCAAGCGTGGCCTTTGAT	N	B	1	0.83	Unknown
BARC_1.01_Gm01_36329877_T_C	Gm01	36329877	T	C	AAATGTTAAAGACAATAAAAGGGATCCTGTAGTTAATGCAAATGCCTTAGGATCGAGGTT[T/C]GGTGCCCTTGGTAGTGACAACTCCTCCATAGAAATTGACCCCACCTTGCCCACAAAAACG	Y	B	1	0.83	Y		0.094	0.16	0.126316	0.172	0.141
BARC_1.01_Gm01_36362260_G_A	Gm01	36362260	G	A	GTGCACAGTGTGGAAATATGGGAATGTGACAAGAACCTGTCCAAACTCTGGGGATCATCT[G/A]CGACGGGGATCCTCGGAAAACTTGATGCATGAATGCCTCCCATGACCTAGCCTACTCTAG	Y	A	1	1	Y		0.125	0.16	0.138298	0.169	0.372
BARC_1.01_Gm01_36393636_C_T	Gm01	36393636	C	T	CACCATTCTTCATTGCCTTAGGTTCCTCTAAACCATTCGAACCATCCCCTAGTGTACCCA[C/T]TGTAAGTCATCTGTTGTTTCTAATCATCCCTTAGTGTTTGGAGGACTATGCCTTTACCGA	Y	B	0.988	0.82004	Y		0.125	0.16	0.138298	0.116	0.391
BARC_1.01_Gm01_36419575_T_C	Gm01	36419575	T	C	CCTAATTTTGCACAAAACAAGTTTTAAATAGGCTCAAAATTCACGACCTTGCGCTTAGTG[T/C]CAACCTCGCGCTTAGCGCGCGTAAGTGGAATTGGGCTTAGCGCCAGTCTTGCACTGAGCC	N	B	0.53	0.4399	Unknown
BARC_1.01_Gm01_36516702_G_T	Gm01	36516702	G	T	ATTATGCAAGTTCATATCAAATCACATAATTGATTATGTTATAAGCATAATTAATTATGT[G/T]GTCAACCTGAAAGTTCTAGTGATTTATATAACTAATTAGGTAGATACCATAACTGATTAG	Y	D	0.858	0.57486	Y		0	0.16	0.0793651	0.102	0.086
BARC_1.01_Gm01_36548162_G_T	Gm01	36548162	G	T	ATGGATGGAACCTTAAGATTAAGACACTTGCATTTGGGCTTACCGAGACAGTGAACAGTG[G/T]TGTGGACATAAGGAGGGTGGTTAACAGGAACAAGACAACAGTAAAAGAATATATAGGGGT	Y	B	0.9	0.747	Y		0.094	0	0.046875	0.253	0.115
BARC_1.01_Gm01_36601230_C_T	Gm01	36601230	C	T	CACAACACATGCCAAAGTAGAGTGTCGTCTTGGCATGCACTCCCACATTCGTGACCTTGG[C/T]TTGGACTCCTCCTTGGAGCCGCGCACTCGGACGACATGGTCAGGCAAATCGCAATCTCAC	Y	B	0.915	0.75945	Y		0.075	0	0.037037	0.409	0.16
BARC_1.01_Gm01_36633845_T_C	Gm01	36633845	T	C	GACGGGAGCGAGAACAACGTGTTGCCCAATGACCAGACGCGAGTGTTGGGCTTCCTATTT[T/C]GTACGATTCTCACCTTGCTCATTATTTTCATTTCCCATGGAAAACAAGGCATTTTCTTCA	Y	B	0.742	0.61586	Y		0	0.161	0.0797872	0	0.053
BARC_1.01_Gm01_36661373_G_A	Gm01	36661373	G	A	TGTCGTTCTGCCCCTGAAAGTTGACTTTCTAATTCCTCGTAATCTTCTGCTAGTAAAGTC[G/A]AGTTGCATTCTTCAAGGTTTATCTCCTTTCCTTTTGCAGGTCCTGAGTGGCTAATCGCAT	Y	B	0.842	0.69886	Y		0	0.16	0.0833333	0.095	0.239
BARC_1.01_Gm01_36697878_G_T	Gm01	36697878	G	T	TACTAGAAGTAGTATAGAAACAGCCCAACCCATGATCCACTTTGGAATGACTGGAACTAA[G/T]ACAAATCTATGATGCAAAAAATATTAAAATCACTATGCTACTCATAAATAACATCAAAAA	Y	B	0.8	0.664	Y		0.104	0.161	0.128342	0.042	0.41
BARC_1.01_Gm01_36723932_G_A	Gm01	36723932	G	A	AGTGGATACGAGTTATCAGGTCACTTGGTAACACAGTTGGGCAACTCCCCGTTCAACACC[G/A]GAGTTGCATTATAAAAAATTGATTTTTGTACAAAACAGCAAAAAAAATTAGTAGAATGTG	Y	A	0.976	0.976	Y		0.146	0.154	0.149733	0.29	0.322
BARC_1.01_Gm01_36766685_T_C	Gm01	36766685	T	C	GGTTATTTTAAACATACTACATCGGTTACGTGACGTCGTTGTAGTCCATGTCGTAAAAAA[T/C]TAATGCTTCTATGACGACGATTAAGTACTACCGTCTTAGAATGCACTGTGCATTCTAAGA	Y	B	1	0.83	Y		0	0.165	0.0793651	0.25	0.139
BARC_1.01_Gm01_36798122_T_C	Gm01	36798122	T	C	CCAACACATTGGTCAACACTTCACAATTCCCTCAGCATCCCTCTCCCTCTTTGACACCCT[T/C]AGTGTCATCTTCTGGGCCCCAGTGTATGATCGCATGATTGTCCCATTTGCAAGAAAGTTC	Y	A	0.949	0.949	Y	CDS	0.146	0	0.0729167	0.431	0.245
BARC_1.01_Gm01_36825338_A_G	Gm01	36825338	A	G	AAGGAAACTTCTAGGAATTGGTGAAAAGACAGAAAAGCCAATAATTGCTAGTACAACTCA[A/G]CACTCAACATAATTTCTAAATCTACTAGGCTTGTGAGAAACCCGAAGGGACTTTGAGTTA	Y	A	1	1	Y		0.146	0	0.0729167	0.464	0.227
BARC_1.01_Gm01_36846144_A_G	Gm01	36846144	A	G	AATAAAAAGCTATAGGTGGGAAGCAAGTCGTGGTTGCATAATATTATGGGAGCTTCTGGT[A/G]GTGTGGCTTGGCATCCTTAACCTTAACCTCAACTAGGCAAGCAAGGCCCATAGCCTTTTC	Y	A	1	1	Y		0.141	0.16	0.144385	0.218	0.366
BARC_1.01_Gm01_36869091_T_G	Gm01	36869091	T	G	AGTTGATGCACCAAGATGAGAAGAAAGTCCCCAATTTGGTGCCATTCCTGGGAAGCCATT[T/G]CCAGGAAAAGGACTTTATCTTTGCAATGATGTTCCCAACCTCCGTCGATCCGCTTGAAAA	Y	B	1	0.83	Y		0	0.161	0.0793651	0.205	0.121
BARC_1.01_Gm01_36928337_G_A	Gm01	36928337	G	A	TGAGTCTCGCGTTGCCTTCCCGCCGAAGGGTAGGTTATGACATTGACCCCTTAGGCATAA[G/A]CAATTCCTCTTGGCCACTCCAAAATTTGTCACATGTTCAAGTTGCCTCTCTATAACCAAT	N	B	1	0.83	Unknown
BARC_1.01_Gm01_36953599_A_G	Gm01	36953599	A	G	AAAGTGTGTCCCGTTGGAAGAAGCACGACGATGAAGTGCTTGGTCACAAGGACAAAGGAT[A/G]GGTGAGGGCATCGTGGGTCGGTGTGCGAGATATAGAGGTAAGGGAGACGAGTTTGATAGA	Y	B	0.976	0.81008	Y		0.146	0	0.0729167	0.417	0.241
BARC_1.01_Gm01_36994849_A_G	Gm01	36994849	A	G	GGCTGAAACTTGTGGACCAATCTAGTCCACAACGGGTTTGGGTTGAGTTAGGTTGATACA[A/G]AATATTAACCATTTAAGTTATTTCAAAAGTTTGACCCGATCCACTAGGTTGAACTAGTGA	Y	A	1	1	Y		0.137	0.154	0.143617	0.487	0.275
BARC_1.01_Gm01_37041354_G_T	Gm01	37041354	G	T	AATTGTCTCCCATACCTTCAATGAACCTTGGTTCAAATTGTGAACTGCATCACATGATGT[G/T]GCTAAAACATTGCATTTGTGGTAGTACCCGCAAGCGCATCACATCACATTACAGTGTGCT	Y	B	1	0.83	Y		0.146	0.16	0.152632	0.039	0.424
BARC_1.01_Gm01_37072432_G_A	Gm01	37072432	G	A	CCTGCCCCTACTAACTAAGGCTGAAGCGGTAGAGAGACTTATATATCTGTACCTGCCCCC[G/A]GTGGTTGGCCGCCTGCTGGCGAACCAAGTGCTGTAGATAACGCTCCATGCCTAGTGACCC	Y	B	0.607	0.50381	Y		0.146	0.151	0.148148	0.261	0.348
BARC_1.01_Gm01_37095181_T_C	Gm01	37095181	T	C	AATCTCCACTATTCATCGATAGAGAAGCACCTTTCTTGCAAGTTGCCTAGAAAGGAACCA[T/C]TTTACTTTATTCCAGGCCGTTCCTAATATTTTAGGGGTGTGGGATGAAACAATAAACAAG	Y	B	1	0.83	Y		0	0.151	0.0740741	0.082	0.077
BARC_1.01_Gm01_37143357_G_A	Gm01	37143357	G	A	TCGAGATGGGCTGAAATGGAACATGCAAGGCCCGAGAAATGGTGTGAGGCAAGGTGTCGC[G/A]CGCCCAGCTTGTTGGGGTGGGGTGCTGTTTGGGTCGCCTCAAAGGTGTGAGTAAGAAATG	Y	A	0.915	0.915	Y		0.146	0.16	0.152632	0.174	0.381
BARC_1.01_Gm01_37182982_A_C	Gm01	37182982	A	C	TTCCTTAGAGCTTTTCGTTTGGTGGACTTGCAAACAATTTGTTCGTTTAATAGAAGTTTT[A/C]TTTTACTTCAAGAGCTTATTAAAAGACTATGTTTATTCCTTGGTAACGTACCCAACAAGA	Y	B	0.899	0.74617	Y		0	0.17	0.0797872	0.049	0.074
BARC_1.01_Gm01_37225822_G_A	Gm01	37225822	G	A	TCAATGGAGTTGGTGATGGATCCTAGCCATGAGAATCTCTTGTATAAAAGGTCTTTCTGG[G/A]GATGGAGGTTAGGCAGCATGTCCCATGGCCATGAAATAGTGGAGAGTGCATTAGATACTC	Y	A	1	1	N
BARC_1.01_Gm01_37267722_G_A	Gm01	37267722	G	A	AATAGCCATGGTTGGGCCAACTATAGAGTAAAGCTTTCTATTTCTCCCAAGCATCAACCC[G/A]AGACTTTGTGCCCAGCTATCTAAAATTGATAATCTTCTCTTGGTCTATGGTTAAGAAACT	Y	A	1	1	Y		0	0.158	0.0740741	0.476	0.21
BARC_1.01_Gm01_37306349_A_G	Gm01	37306349	A	G	CATTTATGTTCTAATAAGAGGTTGCATGTTACATGGCCTTGCATATGTTTCTTGTTTCGT[A/G]AGTGTCATGTAGAGATTAACTCATATCTCAAAGTGGTGGCTCCATCTCACCCCTACAACA	N	B	0.988	0.82004	Unknown
BARC_1.01_Gm01_37341931_G_A	Gm01	37341931	G	A	ATTATTAATAGGAAGTTGTTTTTTATATGTGACTGCCATTGTTTAATATATGTTGTAAAA[G/A]AAATCAAAGATTGCATAAGGGTACTAATTTTATCACTTTCAGTGGAAGGAGGTGAATCTT	Y	A	0.899	0.899	N
BARC_1.01_Gm01_37372310_G_A	Gm01	37372310	G	A	AAGGTTTAGGAATGCATCATTGCAAACCGATTTATCCAACCTCGTCTCAATATAGAGGTC[G/A]TGCTTTGCCTACGATTGTACCAAGTGAAAGGGGCACCTTTGGTGGGAATATGATATAAAT	Y	A	1	1	Y		0.211	0.37	0.289474	0.31	0.426
BARC_1.01_Gm01_37416263_G_A	Gm01	37416263	G	A	CAACTGTTTATTCCCTCGTTTGTTTTTCCTTCATTAGTTGATGTATTGCTCTATGATTGG[G/A]ATCACAACATAGGTACAATCTCTCTCTATCTCTCTTTCACACACAAAAAAAAGAAAAAAC	Y	A	0.812	0.812	Y		0.219	0.37	0.293194	0.37	0.414
BARC_1.01_Gm01_37462355_G_A	Gm01	37462355	G	A	CATTCACCACTGTCACCATCATGTCCGTTGTCGCTATCATTGTTCAACACTGTCACCACC[G/A]TGTCCTCCTTAATTGCTACCGTCAATCACTTTGTGGCTTCCTAGCTTCCTGCAACCTTTC	Y	B	1	0.83	Y		0.188	0.191	0.189474	0.161	0.18
BARC_1.01_Gm01_37513161_G_A	Gm01	37513161	G	A	TAGCGCCTTCTTTAGCAACTCTAGCCCAATCCTTTTGGAGTCTTCTATCCAATACCCTTC[G/A]GAGTAGGATTGCATCTGAGCGGTCTGCCAGCTAAAGGGCCATCCTTGTAGGTTCAATCTT	Y	A	0.915	0.915	Y		0.208	0.368	0.287958	0.465	0.346
BARC_1.01_Gm01_37545837_A_G	Gm01	37545837	A	G	TGTGCAAAATATAAGACAAAAGACAAGAGATTAGCACAGGTTATTTTCAACAAAAATAAA[A/G]AAATAAAACTAAAATTTTGATTGGGCGCTTAGCACAGCAGGCTGAGCTTAGTGCGCCTTA	N	C	0.431	0.33187	Unknown
BARC_1.01_Gm01_37574097_G_A	Gm01	37574097	G	A	CCGAATAAGATTATGTCCACGAATTGGGTTTGGCTAAACGGTAAATTGCAATTTGATAAG[G/A]CTATTTTTAACTCTATTGTAATGAGGGGCGGACATTGGAAAAGAAATTGGTGGCTTAACA	N	B	0.965	0.80095	Unknown
BARC_1.01_Gm01_37622285_A_G	Gm01	37622285	A	G	GAATGTGCACGTTAGACCTCTTAGTTAGCCTAACACTAAAGTGGAGACGCACCTCCCTCA[A/G]CAGTCGGACTATTGAGCTGGTTATCAACACATCTATATATTTGAATCTTAATGATAATAT	Y	A	0.947	0.947	Y		0.179	0.359	0.268421	0.232	0.258
BARC_1.01_Gm01_37685842_A_C	Gm01	37685842	A	C	TATGCATGCCATGAGGCAGCCCCGAAAGTTCAAATCCATCTACTGTCTGGCCACTTTGTA[A/C]GTTTTCACTCTAACGATTCCTTTCGCCGTCGCCGTTTATTGGGCATTCGGTGATGAGCTC	Y	A	0.897	0.897	Y		0.188	0.358	0.272251	0.271	0.272
BARC_1.01_Gm01_37712066_T_G	Gm01	37712066	T	G	TTACAAACATCAAATTTAATATCTCATAAAAAAATATTACATTGTAATTCATCTATAAAG[T/G]GAATCCTTGAATGATCACAAACATCAACTTAGTGTCTCGTATAAAAGGACAGCAATACTA	Y	C	0.868	0.66836	Y		0.208	0.37	0.287958	0.143	0.481
BARC_1.01_Gm01_37738693_T_C	Gm01	37738693	T	C	TGCTTAATCCTCCTGAACAACACTTGGCAGTCATCGCCCCTCTAGACAAACTGGTTCTTA[T/C]GCAATAGCTTGAAGAGAGGCTCACAAGTGGCGGTCAGCTATGATATGAACCTCGCTGTGT	Y	B	0.996	0.82668	Y		0	0.167	0.0789474	0.042	0.071
BARC_1.01_Gm01_37767294_A_G	Gm01	37767294	A	G	CTTTATAGGTATCTTTTTTCTTGTTGCTTCATCCTTAGAGTTCTTCCATCTTGAAAGACC[A/G]CATTTTGGGCAACTTCGACATTAGCCAAATCCCTCCAATTCAATATACAATCATTAGGAC	Y	B	0.988	0.82004	Y		0.213	0.368	0.291005	0.146	0.481
BARC_1.01_Gm01_37851938_A_G	Gm01	37851938	A	G	CATCCACAAAGGCCACCCCTAAATCAGTCGTAAATCCCACCTACCGCATAACCGATACCA[A/G]ACACCACCCTTATCATGAACCAAAGCACCAACCAGGGAACAAATTTTCCAGCAAAGAAGC	Y	B	0.949	0.78767	Y		0.037	0.215	0.124224	0.063	0.102
BARC_1.01_Gm01_37884339_A_G	Gm01	37884339	A	G	TCATCGGTGGACTCACTATCTAATAAGGATGAGGCTGGATCGTCCTTCTTTCCAATGAAG[A/G]TAATTGCCCATTCTTTGTCACCAAACTTTGGGTTAGCCTTGGTCACCCTCGTCTTGAAGC	Y	A	0.842	0.842	Y		0.025	0.218	0.119497	0.1	0.112
BARC_1.01_Gm01_37905803_T_C	Gm01	37905803	T	C	AGTTCAAAGAATAGTATAGTGACATGGTTACCAAGGCATAGGCCTTAGGCCCTTTCAGCT[T/C]GAAGCTCCCGTTAGTGGCTTTCCCATCCAACTTAATCATCATAAAGACAATTGTCACATC	Y	A	0.8	0.8	Y		0.188	0.365	0.276042	0.245	0.266
BARC_1.01_Gm01_37929897_A_G	Gm01	37929897	A	G	TGTGTCTTTTATATGCAACTAGTTGCACTTAGGGGCTTTTTACTTGGGATGTATTTGTCT[A/G]AGAAGGTTGTTGGGGAGATTCGAGGGGTACACCTGTGGACCACGAGCCACCACATAAGGA	Y	B	0.988	0.82004	Y		0.167	0.362	0.263158	0.197	0.241
BARC_1.01_Gm01_37954328_C_T	Gm01	37954328	C	T	ATGAGGCACACTTAAGCACACCATTTTTGTGGACGCTTAAGAACGACACTGATGTCTATG[C/T]ATATGTGAAGGGAACTTAAGCATACTTTTTTTGGGCTGCTTAAGCACGACTTATGATGCA	Y	A	1	1	Y		0.167	0.358	0.26178	0.2	0.241
BARC_1.01_Gm01_38001925_T_G	Gm01	38001925	T	G	AATAGTGATGTCCGTAATGTGATCATCATTAGCTCCATCATTACCCATGCCAGAGGGGTC[T/G]CCCCCCTACAGAAGAGAGCTGGACTTTTGGCCAGACAACCCTCTGTAGAAGAGCCTTTGG	Y	A	0.915	0.915	Y		0.167	0.358	0.26178	0.245	0.256
BARC_1.01_Gm01_38025733_C_T	Gm01	38025733	C	T	AGAGTTCTTGAGACCCATGGTAGGCTTCAGAGTAGGATACACTTCAGCCGGCCCAGGATA[C/T]CCTTTCTTCTCCACATGATGACTCCTCTACAGCACCACAGGACCCATGACAGGATTTGGA	Y	A	0.759	0.759	Y		0.2	0.368	0.284211	0.083	0.497
BARC_1.01_Gm01_38058938_T_C	Gm01	38058938	T	C	TCTTCTTCCGCACTTCTTCTTCGCCTGTGCACCCAGCAATCTCCCTCCCTTCGTCTTCTT[T/C]CGTTCTTCCTCTGCGCAAGCTTTCTTTGTCATTTGCTTCTCCATTTTGGTTCCCTTCTTC	Y	B	0.9	0.747	Y		0.167	0.365	0.265625	0.206	0.246
BARC_1.01_Gm01_38081720_A_G	Gm01	38081720	A	G	TGGGTGTTGTAGTTGTGTTTTTTATACTAGAAGGGATGGGATTTAATTTGTTTTACACTA[A/G]GCAGCAATTTCTAGGCCACACCAGCTTGCTGCAAAGCACTTGCGAGGCACACAAAAGGAT	N	C	0.732	0.56364	Unknown
BARC_1.01_Gm01_38108579_T_C	Gm01	38108579	T	C	GGCACTTAGGAGGCACACAAAACAAAAAGATTGAGAATTCACGGCAGAACCTGTGTCTCT[T/C]TGGGGTTCAAGAGGATCAATCTGAGGAGCAGAAGCTGGTTTTGTTGGAGAAGAATTTGAA	N	B	0.9	0.747	Unknown
BARC_1.01_Gm01_38129902_C_A	Gm01	38129902	C	A	AATAGGCTAACTCACCTCTGATATAGTGCCTCAACCTAGTCTGAGGGTGGCTATGCGAGA[C/A]TCAGCGTTGGGGATCAGGGACAATGCCAGTGACGACGGTGGCTTGAGGGTGCCTTTGCAA	Y	B	0.949	0.78767	N
BARC_1.01_Gm01_38175601_A_G	Gm01	38175601	A	G	GGATTTTGGTTGGTAATCAAAGGGAGAGGACCACTTTAGGTCATGGTATCCTTTCTTTTC[A/G]TATTTACTTTGGTGATAGCTCTGTATTTGTTCAGATGTCGTCTGGTCCAAATACCTTTCT	N	B	0.427	0.35441	Unknown
BARC_1.01_Gm01_38206879_A_G	Gm01	38206879	A	G	TTACGAAGGGAGCAGAACACATGGATTCGAGCTATAGCGAAATTTGTGAAAGGTTGAATG[A/G]GTACAAAGGGGGAAAAGTCACAACTGCATTTCAAGGATTGCCTGTGGTCACTTGGCACAA	N	A	0.9	0.9	Unknown	Intron
BARC_1.01_Gm01_38267517_C_T	Gm01	38267517	C	T	TGAAAAGGTTACCAAGAAGACCTAGGAAAGCTAGGAGGAAGAATGAGGTTGAAGGGCAAT[C/T]TGGTACCCAACAGGCAAGAGGTCCAATACTGTTTGATGTTCAACTTGCAAAGAGTTTGAT	Y	A	0.842	0.842	Y		0.042	0.165	0.101604	0.221	0.142
BARC_1.01_Gm01_38314974_G_T	Gm01	38314974	G	T	CCTCGAACCACCTTTTAGAGAACCATTCATATACCTCACCATCATGCTCATTTCCTCTTT[G/T]GTGCTAGAAGCTTGTGATGCAATCCTACCCCCAAGGGCAATGGATAGAAGACTCCAAGAA	Y	A	0.988	0.988	Y		0.167	0.193	0.17801	0.155	0.172
BARC_1.01_Gm01_38391477_C_T	Gm01	38391477	C	T	CAGATTCTCCTCCGGTGCACTAGAGATGTTTTCTCTGGATAACGTTTACGTGTTTCAAAT[C/T]AGGCTATTTAAAATTTATTCATTAAAATTATTTTCCTTTGTGATGGAAGCTTGCTTGTGG	Y	B	1	0.83	Y		0	0.16	0.0789474	0.052	0.07
BARC_1.01_Gm01_38419548_G_A	Gm01	38419548	G	A	TCTATTCGTGTTTCTATTTTTGCGAAGGTTTAGGTTTCTGGAACTTTTGCATCTTCTCTC[G/A]CTCAAGCTTTCACTACGCCCTTTCTCTCGTGAACCTTAGTGAATCAATGTTGTGCCACAC	Y	A	1	1	Y		0.049	0.231	0.138365	0.124	0.403
BARC_1.01_Gm01_38442255_A_G	Gm01	38442255	A	G	AACCCGTTTAACCCACTAATCTGTGTTAGGCCGGCCAACATTTTATGAACTCACTAACAA[A/G]TGAGCTGAGTTGAATTGACCCACCTATTAAGTGAGTCAAGTTAGATTAAGTTTCGGGTGT	Y	B	1	0.83	Y		0.025	0.227	0.121795	0.358	0.185
BARC_1.01_Gm01_38468012_T_C	Gm01	38468012	T	C	AGGGAATCCCTTAGCATCATCAGCAATTGATCCCGCAGCAAAATCATCGGCAACTAAGCC[T/C]TCTACACCAGATGCAGGTACGTCCATAGTCATCGGAGGAACATCCTCAGTCATCTGAGAA	Y	A	0.768	0.768	Y		0.011	0.165	0.0851064	0.095	0.091
BARC_1.01_Gm01_38489766_C_T	Gm01	38489766	C	T	TCGTAAGTCAGAAAGGGATAGAGATAGATCCCGAGAAAGTGAAGGCCATTCTTGAAATGC[C/T]GGAACCACGCATGGAGAAGAAGGTTCGAGGTTTCTTGGGCAAGTTGAATTATATCGCGAG	Y	B	0.434	0.36022	Y		0.208	0.375	0.291667	0.091	0.499
BARC_1.01_Gm01_38517819_G_A	Gm01	38517819	G	A	CCTCCCCTGTGGTAAGCACCACACCTTGGTTGTGGACTTTGCAAACTCCAATTTCTTCTA[G/A]TCTTCGTTACATTTGAAAGGTAGTAGCCATTATTCTGCTGGATCAAAGATTTACAAGGCA	Y	A	0.965	0.965	Y		0.208	0.368	0.287958	0.081	0.499
BARC_1.01_Gm01_38561654_T_C	Gm01	38561654	T	C	TTTTGAGGTTCTATAGCTACTCACGCTTAAGCTTGGCATTTTTCTTAGGCACCAATGTTG[T/C]TGTCAGACATTGGGACTTAAGCACAAGAAAGTTGGCACTTAAGCGCTAGATAGTGGAGCT	Y	A	1	1	Y		0.191	0.378	0.283422	0.167	0.471
BARC_1.01_Gm01_38585987_A_G	Gm01	38585987	A	G	TAGGGTTCCCAAACGTTAGGGAGAAAGAGAAGGGATTGAAGCCTTCATTCCACCTTCTAC[A/G]TGCGATGAGTATTTCTACCTCAAAGACACTTTTTTGAAAATCTCAACGGTGAAGATGTGT	Y	A	0.868	0.868	Y		0.021	0.177	0.0947368	0.375	0.167
BARC_1.01_Gm01_38620788_G_T	Gm01	38620788	G	T	CCCTTCATCTCAAGGTGCACGGTCACCGTTAGATCCATACTATCTTTCTGCTCTGGAAAT[G/T]GTTGGTTTTCGCGGTTTTGGGGCAATGAATTTTCTGGTTCACAACTACAAAAAGAAGCTT	Y	B	1	0.83	Y		0.021	0.176	0.0952381	0.396	0.197
BARC_1.01_Gm01_38661096_A_G	Gm01	38661096	A	G	CCAAAGGTGGTCTCTATTGGACCCCTACACCGGAAATCTAGTAGGGAGCTGCTATACATG[A/G]AGGAGATCAAATGGCAATGCATGTTGTCTCTTCTTCATCGACTTAATCCAACCGATGATC	Y	A	1	1	Y	CDS	0.211	0.37	0.289474	0.357	0.415
BARC_1.01_Gm01_38693026_C_T	Gm01	38693026	C	T	GTAGAATCAAACTTAATAAAATGAATAAATTAAAATCTCCAATGGCCTCAATCCAATTTC[C/T]TGCCATTACCTTTCATAGTGATCTTAACCTCATCAGTATTTTTTACCGTCGTCCTTCCCT	Y	B	0.868	0.72044	Y	5UTR	0.242	0.411	0.415789	0.452	0.428
BARC_1.01_Gm01_38713664_C_T	Gm01	38713664	C	T	GAACAGTTAAAATACCTTGATGTTGCGGCCCAAATCACAGCCGCGGATCATTTTTTGAAA[C/T]CTTGATCCTTAGGGACTCAAATTTTACTTTGTATAAACTCAATCAGTGCTGGCTGTACAG	Y	A	0.935	0.935	Y		0.266	0.452	0.354839	0.221	0.316
BARC_1.01_Gm01_38746029_A_G	Gm01	38746029	A	G	GCGCACGACCTCAACCTCCGAGGCTTTGCGGCGTTGGTATGGGTGTTGTTTGAGCATGTG[A/G]TGATGTTGTTGGTATGGTGTTGATGGCACCATAATAATGTTGTCGGTATGGTGGTGGTGA	N	A	0.915	0.915	Unknown
BARC_1.01_Gm01_38793444_T_C	Gm01	38793444	T	C	TGGATCATGCAGATGACGAAGTCCATGAACAGCCTGAAGAAGCAATTGTTGATGATGCAG[T/C]TACTAATGTCGACGATTTTCCAGGAAGACCCCACGACATATTAGTTTTGATGAACTATGT	Y	B	0.9	0.747	Y		0.311	0.374	0.468085	0.375	0.481
BARC_1.01_Gm01_38838186_G_A	Gm01	38838186	G	A	CCAAGTCCTCCTCAACCCTTGCATTTTGGAAAACAATTTGCAGCAAATTGTTTTTGTTTG[G/A]CTCTTGGGTTGGGTTTGCAAAAGTGATGCCCAATCCGCCAATAACACCTTCCACTATTTC	Y	A	0.996	0.996	Y		0.328	0.37	0.478947	0.134	0.395
BARC_1.01_Gm01_38881143_T_C	Gm01	38881143	T	C	GATTCAGTGTGGGGTTTGAGTTACTAGCAAGAATAGAAGACCCCAACTAGCTTCGTGTCT[T/C]CTTTTGACAAAAATATCATTCGGCCAGTTGGGGTTCAGAATGCTGCTAATTCTGCATGGG	Y	A	1	1	Y		0.289	0.38	0.455026	0.187	0.371
BARC_1.01_Gm01_38907572_T_C	Gm01	38907572	T	C	GTGGTTAGAGATAACCTGTCAGTTGAGAGCCTTGCTACTTAGGGCTGGACGTCCGTGGTT[T/C]TGTGCCAGGGCTTACATGGAGGGCTGACATATGTAATGGAGGGCCACATAGCTTGCCACG	Y	B	0.949	0.78767	Y		0.297	0.374	0.460317	0.245	0.391
BARC_1.01_Gm01_38937523_C_T	Gm01	38937523	C	T	TTGAGGCTTGCATGTTAACAATATTTTTAATATAAACCAATGTTGACCTTAACATTAAAA[C/T]ACGAACATTCATATTCTTATTTCATACCTCTCAAGCGCCCAAAGCCTTACTGTGTAGAAC	Y	C	1	0.77	Y		0.328	0.37	0.478947	0.117	0.39
BARC_1.01_Gm01_38978813_G_A	Gm01	38978813	G	A	TATCCACATTGATACCACCATCAAACCTCAAGGAAGTGAGCTTGTTGAGCTTGGAGACCA[G/A]TGCAGTTGTCTATGAGTTTTCAGAAGCGATCCAAGCACACATCTAAAATCTCTTTGCCAA	Y	B	1	0.83	Y		0.328	0.368	0.478947	0.133	0.394
BARC_1.01_Gm01_39003599_C_A	Gm01	39003599	C	A	GGAGAGCATCGAACGAAATAGCTTTTGATGGTACTTTGATACATTCAAAGCTAATTTCAT[C/A]AAGTCCCTAAATACAAATAATTTTGCTATGTAAAGGATAAGCTAATTGATGCAATCCTTC	Y	C	0.858	0.66066	Y		0.328	0.349	0.486631	0.072	0.368
BARC_1.01_Gm01_39047666_G_A	Gm01	39047666	G	A	AATGCGTGTGTTGCCTTTTCTACTCATTCCCATTTTAGCCTCTTCACTATGCAAATCCTC[G/A]ACTTGTACTTAGAATGGTTTTGATCAGAGGTCACACTTATGTTTTAAAAAAAAACTTATT	Y	A	1	1	Y		0.306	0.367	0.47027	0.379	0.49
BARC_1.01_Gm01_39069398_T_C	Gm01	39069398	T	C	CCCACTCGTTACCGCTGGTACATCGGTGAGGACCCCACCTTGCCCAACGAGATCGGAGAC[T/C]TGTGCGAGGGTTTGTACGAGATGAGTGGAATAGATTCAAAAGAGAGAAAGGTTAGAGTTT	Y	B	1	0.83	Y		0.306	0.374	0.467742	0.348	0.436
BARC_1.01_Gm01_39102434_A_G	Gm01	39102434	A	G	TTACCTATAACATTGAATGTGGAGGTTTTGCTCAGCATGGATGACACGGTGGTGCTGACT[A/G]CTAGAGGAGATGATGGTGGTTTGTGCAACGAAAATTATCTTGAATTGTTTATGCGTGATG	Y	A	0.822	0.822	Y		0.318	0.38	0.468421	0.176	0.374
BARC_1.01_Gm01_39176606_T_C	Gm01	39176606	T	C	AAAAATCCTGTTAGTGATCCTAGTCCTGTGGTGGTGGTGGGTCATGATCCATGGCCTCCT[T/C]GTTCAAGTCCAGTGCATGAGTGCTTGCTGGAGATGCCAGCTGAGTACCCTCTGCGGTCAC	Y	C	0.641	0.49357	N
BARC_1.01_Gm01_39204083_A_G	Gm01	39204083	A	G	TGACAACCCTAGGAAGATTGAATTGGCCACGTTCCAATCTGAGGGTTCCGATTACTCCAC[A/G]ATCAAGCTCGAATGTGAGTGTGCATTCACCATGCTCCGCTGCAGGAACCACACCAAGCAA	Y	B	0.854	0.70882	Y		0.287	0.38	0.455026	0.193	0.368
BARC_1.01_Gm01_39234614_A_G	Gm01	39234614	A	G	GATGGACACAAACAGAGTTTGGACACACATAGCAGCAGCGATGGTGACGATCACGATAAC[A/G]AGGGCAAGATGCTAGGGTTATACATAGTAGGGCTTTGGGTGAGCGAGAGATCTAAAATGA	Y	C	0.996	0.76692	Y		0.297	0.38	0.457895	0.408	0.443
BARC_1.01_Gm01_39268278_G_A	Gm01	39268278	G	A	TTTGGACTTGTTGCCCGTATGGAGATAATTCGTCTTCTTGTCTCCAAGGACTCAAATGGG[G/A]TGGAAAATTTTTCAACTTTATATCAAATTAGCCTTCCTAAACAACTATCTTGATGAAGTT	Y	C	0.842	0.64834	Y		0.307	0.363	0.470899	0.255	0.44
BARC_1.01_Gm01_39291990_A_G	Gm01	39291990	A	G	GATTGGACCTTAAGTTTGATTTCTTTAACTATTTTTGTATGGAGGTCAGACCAAGGAGAC[A/G]GATTTTTCTTCAGCCTGTCATGTGACGGCTTGACAATATTGTTTAAATAGGGGACAAATT	Y	B	0.458	0.38014	Y		0	0.161	0.078534	0.008	0.057
BARC_1.01_Gm01_39329421_A_C	Gm01	39329421	A	C	GCAGAAAGGGTTATGGCGGAGAAGGAGAAGTAGGTGGAGGCGAAGGAAAAGAATAGGAAG[A/C]GGATCTAGAAGGAGCTGAAACGGTGTGTGGAGGCGTAGACGTTCAATGTGAGGGACGTGG	Y	B	0.949	0.78767	Y		0	0.145	0.0695187	0	0.049
BARC_1.01_Gm01_39393719_A_G	Gm01	39393719	A	G	TCGACCCATTGAGTCGAAAGGTGGTGATTTGGACAAAATGAGATTCGCCAAAAATAACTC[A/G]CTGCAAGTCTTTGGGGGCGACAATCTCCTTCTCCTTATTTTGATCATCGCTGGTGGCTGA	Y	B	0.765	0.63495	Y	Intron	0.298	0.378	0.459893	0.305	0.408
BARC_1.01_Gm01_39452451_T_G	Gm01	39452451	T	G	GCTTTTGCAGCTTCTACAATCCCCATGTTTCAGCCTCATTGTCGGCTAGTCATCCATCTT[T/G]AGGAGTTCTTAGGAAATTATGTCCACCATTAGAGTCTGTGGAGTCTATTTTGTGAGTCTC	N	C	0.842	0.64834	Unknown	Intron
BARC_1.01_Gm01_39475473_T_G	Gm01	39475473	T	G	TGTTGATGACAATAGTGGTGGTGGTTGCACTAGCAATGATAATGGTGACGACAATGGTGG[T/G]GATGGTGGTGGTTGTGGTGACGACAATGATAGTGGTGGTAATGGTGGTTGTAGCAGCAAC	Y	B	0.9	0.747	N
BARC_1.01_Gm01_39503811_C_T	Gm01	39503811	C	T	TCATTGCTTAGAAACTTACTTCCGATGCATGATGGCCGATGCTCCACAAAAAGGGTCTAA[C/T]TGGTTGTCATTGGCAGAATGGTGGTACAATACTACCTACCATACTTCTATTCACGCCACC	Y	A	1	1	Y		0.342	0.368	0.486772	0.045	0.358
BARC_1.01_Gm01_39536034_G_A	Gm01	39536034	G	A	CAATTCCTCCACATACGTTCGTGAGCTAGCAGCCATCACCGCCGCCGTAAAGAAGTGGCG[G/A]CAGTATTTGCTAGGACACAAATTCACCATTATGACTGATCACAGGAGTTTGCGGGAGCTC	Y	A	0.988	0.988	Y		0.328	0.37	0.478947	0.032	0.37
BARC_1.01_Gm01_39561856_T_C	Gm01	39561856	T	C	TTCCGGCCAAAGGTGACTTCAAACGGGATCATGCCAGTCATAGAGTGACACGACGTATTG[T/C]AAGACCACTCAACCCAAAGCAAGTAGCGACCCCATGCGGAAGGTTTTTGGTGAACAAATG	Y	B	0.897	0.74451	Y		0.328	0.363	0.481481	0.036	0.359
BARC_1.01_Gm01_39589738_T_C	Gm01	39589738	T	C	TCATGTTTTGCTTCTTACTTTTCCATGAGATCATATTCCCTCCAATAAGAACATAGTACC[T/C]AGAGGCAGATCTCCTACCTGATGGTGACCCAACTCAATCAACATTAGGGTAAGAAATGAT	Y	A	0.996	0.996	Y		0.321	0.37	0.47619	0.037	0.364
BARC_1.01_Gm01_39646243_C_T	Gm01	39646243	C	T	CAAGATATGATAGTAATTTGTCGGAGTATGTTTTATAAGAATCCCCTTCTTTGGCCTAGA[C/T]ATCACTTTAGAAAAATGGACAAAAAGCTTCGAGCAAGAGGAAACGAGAAACCCTTTGGCC	Y	A	0.868	0.868	Y		0.339	0.37	0.484211	0.366	0.468
BARC_1.01_Gm01_39693650_G_A	Gm01	39693650	G	A	GGCGGTAGAGATACGAGTGGCAGTCTAGTGGTCGTAGTGGCAATGACGATAATGACAATG[G/A]TGGTCATAGAGGTGGCATTGGTGATGGTGGCAATATTGATGGTGTTGGCAGTGATAACAT	Y	B	1	0.83	Y		0.318	0.374	0.470899	0.354	0.434
BARC_1.01_Gm01_39724988_A_G	Gm01	39724988	A	G	ATGCATCCCCAAGCATGGATTGTGCATAAAAGGCCTTCTCTTTGGAAATGAAGCATGATC[A/G]TGCTTCATTTTGAACAATCGTGCCTAACTGAAGAAATTAACATTGGAGTTTTCTAAAGCA	Y	B	1	0.83	Y		0.328	0.484	0.403226	0.339	0.496
BARC_1.01_Gm01_39768296_A_G	Gm01	39768296	A	G	AATGCATTCCAGAATCAGAAAGAGGCCAAAATAGCATCTGGACAATTTCCAGTACTTGGT[A/G]GCGAGGGAAGATTTCCGATACGGACGCAATCTGACATATACCTAGGCTCTCATATAATAA	Y	A	1	1	Y		0.332	0.473	0.4	0.403	0.471
BARC_1.01_Gm01_39803394_C_A	Gm01	39803394	C	A	TACCCTTATAGGAATTTTCTACATTTGAGTTAACCGCAAAGAACCCGTAGTTTGTAGATA[C/A]AGTATTGTTAAATAGCTGTCATGCCGCATAACAGAATGGCGTGGCTGTAGGCAATTTGTG	Y	B	1	0.83	Y		0.37	0.298	0.333333	0.126	0.266
BARC_1.01_Gm01_39846535_C_T	Gm01	39846535	C	T	GAACGACACATTCTTCGGGATCAGCGAGAGGCTACCTTGTGCCCAATTCCTTGGAATTTT[C/T]TGCCGCCGACATTGTTTTCTCCAACGTGGCGGCACCATTGTCGACCTGAGGAAAAAAATC	Y	C	0.996	0.76692	Y		0.365	0.298	0.331579	0.148	0.27
BARC_1.01_Gm01_39869604_G_A	Gm01	39869604	G	A	CTAACATTGTAACAAACTAACATTTGCTGATAAAAAAATCTATTTGGAATAAGGAACCTC[G/A]GGAGAGCAATTAGGGGATTACTACTTCTAAAGGTTTTGAGTGATCATGACAAGTTGCTAT	Y	B	0.768	0.63744	Y		0.031	0.146	0.0842105	0.306	0.159
BARC_1.01_Gm01_39892023_G_A	Gm01	39892023	G	A	AAAAAGAACCAATAATTTGGTTTTTTTTTCTTCTGAGCGATAATTTGGGATTGACGGAAA[G/A]CTAGTGGGCGCTGAAGATAAAAATATTGACCAACGACCAATCAGATTAATTTGTTTGTGT	Y	A	0.889	0.889	N
BARC_1.01_Gm01_39939520_A_G	Gm01	39939520	A	G	ACGTCGCGAGGTTGCTTGCCTTGCAACCTTTGTCCTTGATCCAAGTGGTAGCTCTAGCTC[A/G]ACTTCAGGAGGATAAAATTAACGACGACCGCCACTCTTCTCGTCCTCGTCCTCGTCCTCG	Y	B	0.976	0.81008	Y		0.313	0.053	0.180851	0.261	0.211
BARC_1.01_Gm01_39969821_T_C	Gm01	39969821	T	C	CACGAAGACAACACCACCATCCGTGGCATCGATGACGACACTAGCTATCCACGACAGCGA[T/C]AATAACACCAGATGTCTATGACGGAGGTGACGAAGATACCAACATCTACGGTGGTGGCGA	Y	B	1	0.83	Y		0.292	0.063	0.170213	0.323	0.229
BARC_1.01_Gm01_40020771_T_C	Gm01	40020771	T	C	TGTGTTAAGAGAGAAAAAGATTCAAAGCATAGTTGTGAAACCTGATTCGATCCGGTCGGT[T/C]GAACCGGTCCCATCGAGATCTGATAGCCTAACTAGATCGATTCTCTTATTGTATCAGTCA	Y	A	1	1	Y		0.311	0.053	0.180851	0.276	0.215
BARC_1.01_Gm01_40042848_T_C	Gm01	40042848	T	C	AATTGCTAGATATATCTGAAGATTCAAAACCATGAGTTGTTTTTGAGCCCATATGAATAA[T/C]AGTATTTTCAGCTTCACAGTCACTTCTATGATTAACTACGACAGTAAAAAACATTGAACT	Y	C	0.772	0.59444	Y		0	0.147	0.0687831	0.01	0.054
BARC_1.01_Gm01_40072065_A_G	Gm01	40072065	A	G	CCGACGTCAACTAGGATTTTTTGGCTAACATCGACCAAGAAACATCATCGACCGACATCG[A/G]TAAAAAAAACCCTAACTAACGTCAGCCAAAATATTCCCGTAATTGACGTTGATCGAAGAA	Y	B	0.719	0.59677	Y		0.311	0.053	0.180851	0.321	0.23
BARC_1.01_Gm01_40099168_A_C	Gm01	40099168	A	C	TAATTCACGAAGCACAAATTGCCCACAGCAGTGGCGATACCCGAAGCACAAGTTGCCAGT[A/C]GCAATGGTGATTCCTTCTGCACCTCCCGAAGCACAAGTTTTCAGTGGCAATGGTGATTCC	Y	B	0.927	0.76941	N
BARC_1.01_Gm01_40171249_C_T	Gm01	40171249	C	T	TGGAATTCTGATGTGTATGGATTCCTCGAGCCGCAGTTCATTCAGAGATATGGGCAATCA[C/T]AATTTGAATCCGAAAGTTACATCAAGAGTTGGATGCAGAGTTCAAAACGAGATGTTTACC	Y	C	0.436	0.33572	N
BARC_1.01_Gm01_40195425_G_T	Gm01	40195425	G	T	TCACTCACGCGCCTCCAATTTGACAACACGTGGTTGGCAACCCTATGCTTCAGCGATAGT[G/T]CGGGGTTCAAGGTCTGGCCTAGTTGCTGCTTGCGGTGCTGTTAGGGTTCACGAAGGACCC	Y	A	0.976	0.976	Y		0.333	0.484	0.405405	0.031	0.289
BARC_1.01_Gm01_40228557_T_C	Gm01	40228557	T	C	GCAGCGCCTCAGCTTCGTTTCCTCTTCTTTCTTCTTCTTCTTCTTCTTTCATTCTTCTCT[T/C]AATCCCCTCCCCTTATGAACCTTGGAACCCTTTAAAACACCCCTAGGACGCCTATTTATA	Y	B	0.426	0.35358	Y		0.358	0.318	0.336842	0	0.339
BARC_1.01_Gm01_40269535_A_G	Gm01	40269535	A	G	ATTAGAGTGACTAGAGTTATGAACCCTGGGGAAAGATCTATTTATATCTAGAGCAGTAAC[A/G]ACCTACATTTTCCTATGTTTTTGAGAAAAACATTTTAAAATGTTTGTTGAACATCCTTTG	Y	A	0.988	0.988	Y		0.016	0.209	0.108527	0.356	0.216
BARC_1.01_Gm01_40300606_T_G	Gm01	40300606	T	G	AATTATTGATTGGTTTTTGAAACTAAAGTTCAAAAATTAACATTATCATAAAATCAAAAA[T/G]CACTAATTAACAAGTCTAACAGGGCACAACTACAAAAGCAAAATCACAAACACTTAGAAG	Y	B	0.787	0.65321	Y		0.045	0.209	0.122137	0.374	0.232
BARC_1.01_Gm01_40401744_T_G	Gm01	40401744	T	G	TTATTGTAGTTGTGTCCCCGTGTTCGTTTGTGTTCGACACCATGTTCGAATTCGTGCTTT[T/G]TAGTTTGGCTCCTAAGAAAGACAAATTTGTTAATGTTAAATATTATAAACCCATTGGTGC	Y	C	0.996	0.76692	Y					0.134	0.134
BARC_1.01_Gm01_40429688_T_C	Gm01	40429688	T	C	TCATGGGCAAGGCAGAGCCATACACAACGACTTTCATAAGGGAGTCAAGATCCTTGTTGA[T/C]GTTGGGACGCAGGTTTTATTACCGCTACACCTTCTCTCTCCAAAATTTTCTTGAAATACA	Y	C	1	0.77	Y		0.358	0.457	0.406417	0.492	0.445
BARC_1.01_Gm01_40455897_T_C	Gm01	40455897	T	C	AGCTCGACTTGATCATCTATTCAAACATGAACTTGAAGCTTTCCAACACAAGTATGTGCT[T/C]ATAACTTTGTATCGATATGCCATGAAAAGGTTCTACAGGATGTGGAAATGCTGCTCTGGT	Y	A	0.812	0.812	Y		0.353	0.458	0.402174	0.484	0.451
BARC_1.01_Gm01_40492469_G_A	Gm01	40492469	G	A	TATTTTTGTTTGCTTTTGGTACGTGACAAATTTTTTATTTTGGAAAACGGTACATACTAC[G/A]AAAATAACACAATTACTAAGTTATCCATTTTTAAATGACCTAAACTCAGTTGATGTGATG	Y	B	0.899	0.74617	Y		0.379	0.457	0.417112	0.168	0.444
BARC_1.01_Gm01_40514384_G_T	Gm01	40514384	G	T	TGGGGTTCACAGGCAAAATTTATACCACAACCCTAGCTTAGGGATTTTAGCTAGCCATAG[G/T]CACATGAAAGCATAAAATACTAGTAAAATTCATAGAGACTAATATAGAGGAGAAACTCTT	Y	B	1	0.83	Y		0.379	0.451	0.413978	0.299	0.488
BARC_1.01_Gm01_40556614_T_C	Gm01	40556614	T	C	TGATGTGACCCCACCCTCATTCACCACCATTGTGCATAACCTTACCCTTGCCCATCACGA[T/C]CGAGTGCGACCCCACCCTCATTCCACCAAGCATTGTTGTCGTTGATTTGTGTTGCACCAA	Y	B	0.949	0.78767	Y		0	0		0.438	0.208
BARC_1.01_Gm01_40579014_A_G	Gm01	40579014	A	G	TCGGGAAAAATCCGAACTTGAACACATACTCGATCAACTTGGATATTACCTGTAAAAGTC[A/G]AGACAGATTCGAAAGGGTATCTACGGATACGGGTTTTCTTGCCATGTCTAACCGAGACAC	Y	D	0.692	0.46364	Y		0	0.144	0.0687831	0.219	0.122
BARC_1.01_Gm01_40622511_G_A	Gm01	40622511	G	A	CATATTAATGACCTAACATCACGCGGACTACCATCATCGCAGCATCAGACATGCGGGGTC[G/A]CATCTGGAGGGATTCCAGATAAGCATTGCTCACCACCTCAAAGTACTGAAAAGCCGTCTC	N	B	0.668	0.55444	Unknown
BARC_1.01_Gm01_40769732_A_G	Gm01	40769732	A	G	TGGCCCGTAGCTATACGCGAGCTACTTTCGAACCATAATCAAACACTCTAGCTAGTCCCA[A/G]CTCCAACGTATCGTCTTGTGCCCTAGGTTACGCCGTTAAGGCTCTAGCTCGCGCCGTGCA	Y	B	0.8	0.664	Y		0.344	0.458	0.398907	0.39	0.402
BARC_1.01_Gm01_40793702_C_T	Gm01	40793702	C	T	AAAGTCTTCCCAGGGCAACCAGGCGGGCAGGATTTGCTTAGATGTACAAGCCGCACCTCT[C/T]TGAGTCACTCGTCTCAAGATCGTTTTCTGAGTGTCATATCCTAATTTCATCCGGGGACCA	Y	D	0.536	0.35912	Y		0.344	0.451	0.395722	0.345	0.483
BARC_1.01_Gm01_40830760_C_T	Gm01	40830760	C	T	GAAGGGTAGGTTGCGACACTGAGGGATCAACACAATTCTCCTTTGTGCTTACTCGAGTAC[C/T]TGAGGAACCGACCAAAGGCTCTGGAGGTAGTGCAAGTCCCTGAGATTGCATCTGGGAGTG	Y	B	0.436	0.36188	Y		0	0		0.122	0.041
BARC_1.01_Gm01_40886652_C_A	Gm01	40886652	C	A	AAAGCTCAGAACACACAACAATAAAAGCAAAAGCAGAACATTGTTACATTGGCCATGGTG[C/A]TATACGCATTACAACACTCACCTACATACCTACCCATTAAGCATTCAAAGGACACAAATC	N	B	0.542	0.44986	Unknown
BARC_1.01_Gm01_40943450_A_G	Gm01	40943450	A	G	GAATTTGTTTGGCCTCATATCCAATGAAGTGAATTTGGTCAAAAGTCCATTGTACCCACT[A/G]GGAATTCTAAATCTGGGACAACTCATGCAGAAGCTGGTGTATCCTTTCCTACTACCTGTC	Y	B	1	0.83	Y		0	0.142	0.0638298	0.011	0.053
BARC_1.01_Gm01_40985298_T_C	Gm01	40985298	T	C	CGATGGCCAGCTTGGCGGCGTTCACGAGACTCGTGAGCTTTTCACGGGAAGTCGCCGCCA[T/C]GCACATTGTTTTTCCGACCATGACTGAGAGAGAAACACGCTAGTTTGGGAGAATTTGCAT	Y	B	0.9	0.747	Y	CDS	0.337	0.453	0.392473	0.307	0.497
BARC_1.01_Gm01_41008254_C_T	Gm01	41008254	C	T	TATAAATTGGAAAAGACATTGAGATGTTGTCACATCATAGCTAAACTAATGATGGAGACT[C/T]GGAAAAAAAACCTTTTAATGTATCAAGAACTTGAAACAATGAAAAAATTTATTAGGGACT	Y	B	0.935	0.77605	Y		0.344	0.469	0.406417	0.285	0.492
BARC_1.01_Gm01_41065228_A_G	Gm01	41065228	A	G	ATTTCTCAGTTCCCCTCCCATCAATGAGGTGCAAATGCATGAAACTCTCAGGTTCTGACT[A/G]CAATTCATTTTGATTATTGGATATAGCTTCACATTATCTTGAGGCTATGATAGCAATGCC	Y	D	0.687	0.46029	Y	Intron	0.354	0.453	0.40107	0.397	0.476
BARC_1.01_Gm01_41102488_T_C	Gm01	41102488	T	C	CTCTGGCAACCACACCACCTCCGTTGATTTTAGCATCTCCAACAGGTTCACTATCATCCT[T/C]ATATGTACTGCCATGCGTTTACAGTTCCACCGATGTGCCCTGACGCCACCTCCATCGGTG	Y	B	1	0.83	Y		0	0.142	0.0638298	0	0.05
BARC_1.01_Gm01_41125565_A_C	Gm01	41125565	A	C	TAAACTAAACCCAAATTCCTAATTTTGGCACACTCACTACTCAGATAGCCACCTCAACCA[A/C]ACAAACTCATCTCCTCACGCAATCAGCAACCAACAGGCAGCCACCACGCTGACGTTGCCA	Y	B	1	0.83	Y		0.347	0.458	0.4	0.453	0.424
BARC_1.01_Gm01_41169824_T_C	Gm01	41169824	T	C	AGAGGTTTTGTCAGCCTTTGTATGTGGCTTAGGCCCTCCTAGCTTCTAACGTCAATGTTC[T/C]GACCTCAAGTCTAGTGCATCATTAGATTTACCACATCCAAGGTAGTTTTGCTTTAGTGTT	Y	B	1	0.83	Y		0.354	0.452	0.40107	0.417	0.41
BARC_1.01_Gm01_41202090_A_C	Gm01	41202090	A	C	GAATTTTGACATCTCCTCTAGTTCTTCATTTTTTCGTTTGGGTCGCCACACCTCTTCTGC[A/C]CTGCCGCTGCCATCCCCGTGGTGGCCTTGCATTGTTGGGGCATGCACCAGTGGCGCTTAG	N	B	1	0.83	Unknown
BARC_1.01_Gm01_41232826_A_G	Gm01	41232826	A	G	TTTGAACTTTCTCCACCAATAACAGGTGGACCCTTTCCATTGTCATTGTTCCGAGCAACG[A/G]TTCTTTCTCCTTCAACGTCTTGGTCCTCGGTTTCTGTGTCATCGTCGTCATCATCATCGT	Y	B	0.589	0.48887	Y	CDS	0	0.156	0.0736842	0.217	0.125
BARC_1.01_Gm01_41272161_C_T	Gm01	41272161	C	T	TCATCGCATTAGGAACATTCATACATGCACATACCCATGCATATTTTGTCGTAACAGGGG[C/T]AGGATCCTCTTAGGCCATAATCAGAAGTCGAGACAGGTTGATGGCGGAAATCAACCAAGG	Y	A	0.436	0.436	Y		0.375	0.458	0.414894	0	0.42
BARC_1.01_Gm01_41311480_C_A	Gm01	41311480	C	A	TCAATGTCGGTAGCGTAGTTGGGAGGAAGGAGAAAAGGAGAATGGAAAAGAGGGTTTCAG[C/A]GCGCGGGGGCCAAAATTAATTTGGGTTTTTTATTTTATGAACAAAATTAGTTTTTTTATA	Y	C	0.9	0.693	Y		0.29	0.063	0.171123	0.037	0.131
BARC_1.01_Gm01_41369595_A_C	Gm01	41369595	A	C	GATCTGAAGCGTGATGTCGTGACATCCGGTACGACATCTGTCATTGGTATCAGAATTTCA[A/C]CATCCTTGTATATTGGTTGTACCTCTCCTATTAAATGAATGTGTGGTCATACAAGAAAAG	Y	C	0.694	0.53438	N
BARC_1.01_Gm01_41403051_C_T	Gm01	41403051	C	T	CAGCTTTCCTTGGCCTGAACTGAAGCCAGGGCTCTTTCTGGAGGCCAAACCTAACGATTT[C/T]AGGCCGAAGGCCATCTTGACCTTGCTGGCGACGGTGGAGGTGATGGATCTTTGGAGCGTG	Y	B	0.729	0.60507	Y		0.335	0.484	0.407609	0.032	0.285
BARC_1.01_Gm01_41448356_C_T	Gm01	41448356	C	T	CGTGAAGCGGACACAGAAAACCTCACGTCTATGCTCCTTGTCAACTAGACCAGCTGGTGT[C/T]GAGAGACCAATGGTCCACGTTGATCTTGCCACTAGCAAGGCCGACGGTCCCCACAGGAAG	Y	D	0.628	0.42076	Y		0.354	0.474	0.413613	0.482	0.436
BARC_1.01_Gm01_41471845_G_A	Gm01	41471845	G	A	ATATATATATATATATATATATATATATATAGCATATGACTGAGACAAGTATGCGAGTAG[G/A]GAATTATGATGTATATGGATTCCTCGAGCCACAGTCCATCCAGAGATCTGGGCAATCACA	Y	B	0.436	0.36188	N
BARC_1.01_Gm01_41493471_T_C	Gm01	41493471	T	C	TCCACTACCTTCTCCCCTCATCTCAGCATCACCACTTCCATCATCTTCTCCAATGGATCA[T/C]CACACTCCTTCCACTAACCCTACCTTATCTCAATTCTCTTCTTCAAAATCAAACAAAAGT	Y	B	1	0.83	Y	CDS	0.01	0.142	0.0691489	0.224	0.128
BARC_1.01_Gm01_41528259_C_A	Gm01	41528259	C	A	CATCTCCGGTTAAATGTGTCGTAGGCATTGGCCAAAACAGCCATGACCAAACTTTCCTTG[C/A]TATGGTGATAAGTATGGAAGGTGTCAATCGTCGCTAGATCCACTAGCCCATCCACAGTTG	Y	B	0.6	0.498	Y		0.335	0.495	0.413043	0.042	0.292
BARC_1.01_Gm01_41573401_C_T	Gm01	41573401	C	T	ACATTCTTCCTTTGGATTCTTCTTAGTATTTGCAGTAAAGCTGGTTGACAGCCTATCCGC[C/T]AATTGCTTTGCGAGCTAGCCCACTTGGACCTCCAAATTCTTAATGGTGGACTCCGTGCTC	Y	B	0.583	0.48389	Y		0.354	0.307	0.328042	0	0.335
BARC_1.01_Gm01_41604325_A_G	Gm01	41604325	A	G	ATTGACAAGCTTGAATTGGATGATGGCAGTGTTGTTCAGGATCAACACATGATTGAGGCT[A/G]AGGTGCTGAGATTTTATAAGAGCAGGCTAACATATTGATATAGTGGCAATGACAGCAGCC	Y	A	0.965	0.965	Y		0.328	0.368	0.478723	0.125	0.363
BARC_1.01_Gm01_41624978_G_A	Gm01	41624978	G	A	AAATGAAGCTTGAGGCCGAGATGGTGAACTAGAATAGGATGGGGGGGAAACCCGATTCGC[G/A]TACTTGTGCATCGTAGAACCATGGCCAAAGGTGTCGAGTTTCACGAAGGTGGACCTGAAG	Y	B	0.996	0.82668	Y		0.321	0.375	0.473404	0.353	0.471
BARC_1.01_Gm01_41695079_C_T	Gm01	41695079	C	T	AATATATCCCCATGTTGGCCAATTCGATATGGCCAAGTTGGTGACGACAAATTTGTCCCT[C/T]TATGTCACATATGCTATTTTATTATTGGTGACAGACGAGAGTTAACGGTCAAATATATTT	Y	B	1	0.83	N	Intron
BARC_1.01_Gm01_41734929_G_A	Gm01	41734929	G	A	GCTTAACAACACCTTTTTCCTTCATTCCTCATGGCCATACCTACCGTGCAACCTCTAGTT[G/A]AAACCAACACCATCTCAACCCTTCCCATCAAATTGAATGCAAACAATCATCATACTTAGC	Y	A	1	1	Y		0.452	0.309	0.373016	0.389	0.484
BARC_1.01_Gm01_41770769_G_A	Gm01	41770769	G	A	GTCTCCACTCCCATGTCAATGTCCATCAACCTGGCCATCTCTGACGACATGCCCACATGT[G/A]ACGTTAATTCCTATGTCAGCTTATTGGGTCTCTCCAATATCTTTGCCTCACTCATCCCAA	Y	A	1	1	Y		0.332	0.484	0.405405	0.042	0.285
BARC_1.01_Gm01_41828048_A_G	Gm01	41828048	A	G	TAACTCTCGCTAAGCCAGACTCTTGGTTGGCTTATCGAAAATATTGCATCATGCATACAG[A/G]GGGGGCATGCGCTTAGCGAGTGGTTGCTAGCTTAGCGCTATCCAGGCCGCAAGGAATTTC	Y	A	0.9	0.9	Y		0	0.142	0.0638298	0.185	0.111
BARC_1.01_Gm01_41873431_A_G	Gm01	41873431	A	G	TTGCGACTTCAGGTCCACAAGCATCGTTAGGGTCCCTGTATCCGAGGAGTTGTCCACTCA[A/G]GTGCTTAATGACTACCACGGTTTTATCCTTAATAAAAGGTGCCTCAGCGAGTTGAGAGGA	N	B	1	0.83	Unknown
BARC_1.01_Gm01_41922912_C_T	Gm01	41922912	C	T	TGTCCTTATCCGTTGCAACACACTGAAAAGCAAGCTTCGCGATGGCAACAGTGGAGTCAC[C/T]ACCATCAAGAACCGGGTCGAGCACTTGATGCAACTGCCCCATTTGGATCCGCAAAACAAC	Y	B	0.949	0.78767	Y		0.056	0.142	0.101266	0.091	0.383
BARC_1.01_Gm01_41993098_T_C	Gm01	41993098	T	C	TGTTGATCGTGGTGATGATGCATTTCATGATCAGGGAGATGGTAGTTGTGATGGCGACGA[T/C]GACAAGGATGATTTCTTCTCGGATGCTATGGATGTTTTATCTCTATCAGAGGCATTAGAT	Y	B	0.897	0.74451	Y	CDS	0.349	0.375	0.486772	0.461	0.481
BARC_1.01_Gm01_42049775_C_T	Gm01	42049775	C	T	GTTTTTTAAAACCTTGTGTAGAAAACTCAAAGACTCAACTTACACATGATTGAACACCCT[C/T]AAACACCTTATACGCATGACAGAACATACCTTAACCGTGATCTTGCAACAAGTTATTAAT	N	B	1	0.83	Unknown
BARC_1.01_Gm01_42080355_T_C	Gm01	42080355	T	C	CTCATGGCCGACAATCGTTCGAAATCTTCCTCAAACAAATTGGAAGATGCCATCGCCAAG[T/C]TGACTACACACCAGATGAGCCTCAATGAATGCCTCCAAAACATGACCTGTAACATTTCCT	Y	B	1	0.83	Y		0.01	0.134	0.0691489	0.442	0.196
BARC_1.01_Gm01_42120204_A_G	Gm01	42120204	A	G	ATCCAACAAAACCAAGATTCACAAGGTCAATTCATTATAGAGGGAGCCTTCCCTTTCTCT[A/G]ACCTTTATGGACGAAGACTATCCATACTAGAAAAATCGTATAGAAATGTACATAAAGTTC	Y	B	0.9	0.747	Y		0.021	0.144	0.0793651	0	0.055
BARC_1.01_Gm01_42151166_C_T	Gm01	42151166	C	T	ATGGTTTGGCATGGTTGATTGATTACCCTGTCCCTTAAACATGTGGAGAAAGCACAACAT[C/T]CTCTGGTATTTCATTAGTTTCAGCCATTCTAAGATCAACAACGAGGTGAATTATCTTAGC	Y	A	1	1	Y		0.385	0.463	0.424084	0.352	0.4
BARC_1.01_Gm01_42197808_T_G	Gm01	42197808	T	G	TATGTTCTTCGTCTTCTAGGTTACACGTTTTTTGCTAACAAGAGTGCAACCCATGTTCAT[T/G]GTGTCTTATTAGACGCTCTGGGTAACTTATGTCAAACTGGGAGCTGTGCATGGGGAGCTG	Y	D	1	0.67	Y		0.332	0.484	0.406417	0.363	0.491
BARC_1.01_Gm01_42227647_A_C	Gm01	42227647	A	C	GTTGAATCTTCTGTGCCCCCAACTCTCAAATCTATTCGGACTGTTGCAAATGGTTCACTC[A/C]ACATTTTCAAGGCCGAAGTAAGTCTATGGGAGTAGAAATTAAGGATAAATAACCTTACTC	Y	A	0.897	0.897	Y	CDS	0.332	0.489	0.408602	0.031	0.287
BARC_1.01_Gm01_42251190_A_G	Gm01	42251190	A	G	TAGCAGGACAGGCGAGAAAGGAGTCCCGCTAGCAGCACAGGCAAGAGCTGCACTGATGCC[A/G]CCATTCTTCTTGGCGAGATGTGCTGACTAGGCATTGATGCCGCCATTAAGAATAGCGAGA	Y	B	0.878	0.72874	Y					0.008	0.008
BARC_1.01_Gm01_42282866_G_A	Gm01	42282866	G	A	AACCTCAAACTTGTCAAAGGCGACAGTAAGGTGAAGTGTGGAGGGAAAAGATGAATACAT[G/A]TATGTAAAATGAGTCTCACACAAAAAATCACGCATGAAAACATATTCATTTTCCCAGCAA	Y	B	1	0.83	Y		0.354	0.447	0.398936	0.208	0.339
BARC_1.01_Gm01_42320965_T_C	Gm01	42320965	T	C	AGATAAAGAAAAAAGATTTTAAAGGTTGGTCATAAATTATTTTTATAAACTTAGCTAAAT[T/C]AAATTAGTTTTCTACTTATACGGCAATCCTAATTCGTGAAGAAGAAGAAGAAAACGGTAA	Y	B	0.899	0.74617	Y		0.349	0.495	0.424731	0.063	0.306
BARC_1.01_Gm01_42348214_G_A	Gm01	42348214	G	A	GCACAACTTCCCTTATTGCTGACACATGCAGCTAATATATATGTATCCAGCGCCTCAACT[G/A]GGGGTGAGTGTTGTGAGGCCATTCGGGATAACTCAATTTTTATTGCCTCCTTCAACTCTT	Y	A	0.9	0.9	Y		0.359	0.484	0.418478	0.053	0.304
BARC_1.01_Gm01_42373259_G_A	Gm01	42373259	G	A	GGTGATGCTATCGTCTACCTGAATCTGATTTAGGGATACCGGGTTGGGAGAGAAGATGAA[G/A]CAGGTGGTGGGAACGGTGGTTTCAAATAAGATGCAGAAATCAGTGGTGGTGGCAGTGGAT	Y	B	1	0.83	Y	CDS	0.385	0.452	0.417989	0.247	0.475
BARC_1.01_Gm01_42394758_C_T	Gm01	42394758	C	T	GCTTATTGAGCCATCTCATTTTGCATGGCATTGTTTGGTTGTGCTTGAAATATTAGGTTC[C/T]GTTTGATTCTCTTAATTTTGGGGGATAGGACAAAACCAATCAAATTGATCCCCGTTTGAT	Y	D	0.988	0.66196	Y		0.292	0.063	0.17801	0.091	0.424
BARC_1.01_Gm01_42445255_G_A	Gm01	42445255	G	A	CTTTCATGAACATGTGCACTTCACAGTGCACAACTCGCTAAGAGAGTCACTCTAAACTGC[G/A]TTTTTTCAGTTTCCTCAATTGATGCACCAACTCTGCAAAAATACAATAAAACTAATAAAT	Y	B	0.996	0.82668	Y					0.008	0.008
BARC_1.01_Gm01_42468038_A_C	Gm01	42468038	A	C	ACCCTTGGTGACCATAGGCATTGTGTCCTTTCCATCGAGAAGCAACTGCCTAGGCACCCC[A/C]ACTCAGATCTGCACTAATACCCAATCATCATCTCACATCACTACCCTAAAATTGGCACTA	Y	B	1	0.83	Y		0.385	0.452	0.417989	0.159	0.332
BARC_1.01_Gm01_42538294_C_T	Gm01	42538294	C	T	CATAAAACTTCTACAGAGAAAGAAGAAGAGTCATAGCGACAGTGATAGCGAGAGGCGACA[C/T]GGAGTGGGAGTGAGAAAGAAGATTCGCGACGTGGTGGAGAGGAACAGAGTTGCGACGAAG	Y	B	0.996	0.82668	Y		0.375	0.495	0.439153	0.06	0.316
BARC_1.01_Gm01_42565938_G_A	Gm01	42565938	G	A	GACGATAGTCCTTATGGTTGACCACAACCCTCATGAATTGACCACGGTTATGGTGAATTT[G/A]CCACAACCATTATCGGATTGTTGAAGCGGTTGACAAAGGATTTTTATCATCTCATTATGG	Y	A	0.988	0.988	Y		0.353	0.473	0.411765	0.1	0.31
BARC_1.01_Gm01_42593071_C_T	Gm01	42593071	C	T	CTCAGACCCCATCATTCTGCTGAGCCTCCCAATCTCAAACCCCTCAGCGCATTTGTCGAG[C/T]TCCCTCTGGTCCTTGGCGGCCTGCTTCATTTTTCCCAGAACCTCGTCGCCACCTTCGCTC	Y	A	0.854	0.854	Y	CDS	0.349	0.484	0.413978	0.043	0.299
BARC_1.01_Gm01_42624737_C_A	Gm01	42624737	C	A	GTCATGGAGGTGGATGATGGTGGTCAATCTCTCAATATTGTCACCATTGTAGATCTTTAA[C/A]CTTTAGCCGTTCACAATCCAGCTCCACTATGGGTTAGTAGATGAAGGATCCATCAGCTCA	Y	A	1	1	Y		0.353	0.489	0.419355	0.143	0.328
BARC_1.01_Gm01_42663447_C_A	Gm01	42663447	C	A	TTATTTCATTTTCAGAATAGTTCGTTTGACTCACCTTATGCACCGAATCCTATCAGGTTG[C/A]GTCAAACAAAATAATAGCCAAAGTTCTATTTATCGAATTTTAAATCAGTTTTGATACTAT	Y	B	1	0.83	Y	Intron	0.354	0.489	0.419355	0.149	0.335
BARC_1.01_Gm01_42700828_A_G	Gm01	42700828	A	G	ATGCTTTTCCAGAGTGAACATCTCAGTCTCATCTTCAGTGTCATCCAGATGGTCTGAAAT[A/G]GGGAGATCTTGACTTTCGTGAGCCCATTCCTTTAGTTTCTCATATATAATGTTCATCTCC	Y	A	1	1	Y	CDS	0.358	0.495	0.424731	0.031	0.297
BARC_1.01_Gm01_42761957_G_T	Gm01	42761957	G	T	GATCGAGACGCTAATTCTTGGTTATTCTTCCTGATTGCTTTTGTTCTTGTGCTCACGATC[G/T]CACTTCGTGCAGCTCACTACTGCACTATATGCAGCAACAGCGGGGACGCGAGTGAAGGAG	N	B	0.75	0.6225	Unknown
BARC_1.01_Gm01_42786718_G_T	Gm01	42786718	G	T	TTGTCACATGCTGGCTTTGCGGGTCAGGTTCCAATACATATTTCTCAGATGACAAGGTTG[G/T]TTACTCTTGATCTCTCCTCTTCTTTTTCAACAGGGGAAGTGCTGAAACAACTTGAGATCC	Y	A	1	1	Y	CDS	0.242	0.031	0.128342	0.137	0.14
BARC_1.01_Gm01_42823010_G_A	Gm01	42823010	G	A	AAAGAATTAAAATCCAGATAAGTTTTTGCGCTTAGCGAGTCCATGTGCTTAGCCCAATTC[G/A]AAAGAATAAAAATCGAGAGAATTTTTTTGGGTTTAGTGCGAAGAGACGTGCTTAGCGAGA	N	C	0.787	0.60599	Unknown
BARC_1.01_Gm01_42848317_T_G	Gm01	42848317	T	G	CACAAGCAATCAAAAGAAGCTATATTGGGTCCTAGACTAATAAGGCACTACTAAGAATAG[T/G]AACATATAAAAATAGAATTTCACTAAATGAAGGATCCGAAGGAGAAGCGATGAAATTTGC	Y	B	0.868	0.72044	Y		0.339	0.484	0.409574	0.474	0.456
BARC_1.01_Gm01_42870832_G_A	Gm01	42870832	G	A	CTTACCTTAGTGTCTTTGCATATATCTCTTTTAGTTTTTTTTTAAATAGTTTTAAGCAAG[G/A]CTTATTTGGTAAAATTAGTTGATAAACTTTATATGCGGTGAGTTAGGAGCTAAACAGCTA	Y	B	0.899	0.74617	N
BARC_1.01_Gm01_42903918_G_A	Gm01	42903918	G	A	ATCCGTCAGTGGAGTGTCCTTGATCCTGACTTTCCTCAATTGCGACTACCCTCGATCCCA[G/A]CCTTTAGCTTCACCAATTTCTTTGATGATTCTCCACACACTTTTTCTCAGAATTTGGTCA	N	B	0.949	0.78767	Unknown
BARC_1.01_Gm01_42947720_A_G	Gm01	42947720	A	G	TCGGCGTCAGCAACACCATCTCTATTGGCACCCAAAGCATGTGCTACAACCTGTAGTCCA[A/G]GGACCTCATCGCTGACAACATCTTGATCGTCATGGCCGCACAGTGGTATGATGCTAACAT	Y	A	0.996	0.996	Y		0.339	0.489	0.411765	0.479	0.455
BARC_1.01_Gm01_42986108_G_T	Gm01	42986108	G	T	GTTCAATCCTAAGTTGCTACAAGCCTCCACTTATATGCACGAATTGTGTGCGATAACGAC[G/T]GTTGTTAAGAAATGGCGGCAGTATCTCATTGGTCATCAATTCATCATTCTAACTGATGAC	Y	A	1	1	Y		0.339	0.484	0.408602	0.053	0.296
BARC_1.01_Gm01_43015230_G_A	Gm01	43015230	G	A	CACATGCCATGCATGTTTCTCGCCATTTCCAATGACGAGAGACTAGTGCAGTTTTGATTC[G/A]CCATTTCTAGTGGCGAGACTGGTGCAGATTCTTTAAATAGCGAGCCTTCCTGATGTTTCT	N	B	1	0.83	Unknown
BARC_1.01_Gm01_43038990_G_A	Gm01	43038990	G	A	GAAAAAGCTACTGTCTCAAGATCTTCTTCTATGTACAGGGCCTTAGCTTCCCTCACATGT[G/A]AGCTCCAATGACTACAATTTTATGCAACCATCTTCACATCTTGCCAAAACCCCATTTACC	Y	C	0.988	0.76076	Y		0.198	0.24	0.212766	0.392	0.279
BARC_1.01_Gm01_43066939_C_T	Gm01	43066939	C	T	TTTCTCTTTAAAACACAATACAATCATGTTTTTTCGATATTGACTGTATACTAAGCCATA[C/T]GCATTGAGCACGCATGTCATGTCCAACTGGCTTAGGTAGTCACACACTAAGCCGTTGGAT	Y	A	0.996	0.996	Y		0.274	0.484	0.37766	0.088	0.283
BARC_1.01_Gm01_43106876_A_G	Gm01	43106876	A	G	CTCAAAAAGAATATAGAGTACTAATTATTTGCGTAATAAGTACGGCTACTATAGTATTTC[A/G]GATTAGCTCAACTCAATTCAGATGTCTTATTGCGTAGAGTACTTGGCGTTGAACTTGTCA	Y	D	1	0.67	Y		0.339	0.484	0.424731	0.345	0.404
BARC_1.01_Gm01_43141217_A_G	Gm01	43141217	A	G	ATCAAACTCAGTACCCTCCACATCCATCTTCATCACAACAAAATCGTTCTCCGAAACCGT[A/G]TTCTTCAACCATTCAGCGAAATCAAACCCCGAAATCTTCTCAAGCTCACCACCATCAAAA	Y	B	1	0.83	Y	CDS	0.255	0.24	0.240642	0.3	0.269
BARC_1.01_Gm01_43178138_G_T	Gm01	43178138	G	T	AAAAATAAACCAATCCAATCAATTAAGCCAAACACAGAAACATCATCAACAAGTCGTTGG[G/T]CACCAGACTGGGTCCCTTAAACAAGTTGCTAGGTTTGAGTTTTGTAGATAAAGGTGACCA	Y	A	1	1	Y	Intron	0.444	0.458	0.496732	0.311	0.439
BARC_1.01_Gm01_43223300_A_G	Gm01	43223300	A	G	ATCTGTCTCAAAATCGTAAATGGCCAGTGTTTTAAAAAAGATAAACTTGCTATAAAATAC[A/G]TTAAAAGGACCATTTTATGACTTTTAACAAATAAAAAACTAAATTGTAACTAGAAGATAA	Y	B	0.765	0.63495	Y		0.353	0.473	0.410811	0.105	0.313
BARC_1.01_Gm01_43254220_T_C	Gm01	43254220	T	C	ATTGCCAACAGATAAGATCAGTCACAGAAACCAGAAGACAACAGAAATTAAGTACGTCCA[T/C]AGAATCTGCAATCCACAACTTGCTAAAACTATGCTCGAGAATTAAACCTTTCTCTATTCA	Y	A	0.988	0.988	Y	Intron	0.411	0.473	0.44086	0.385	0.5
BARC_1.01_Gm01_43290929_T_C	Gm01	43290929	T	C	AACTGCTGTCATCGGCATTCCTTTGCTCCGTTGAGGCCGCCCACACCACCACATGGTATT[T/C]CGCCTTTGAGGTAAGTTTTTTTTCCTGGTTTTCGATCATTATTGTCGAGGTAAATTTTTT	Y	B	1	0.83	Y		0.429	0.385	0.473988	0.432	0.464
BARC_1.01_Gm01_43346673_A_G	Gm01	43346673	A	G	TTATATCTAGGGCATTTTGGGCATGCTAACTAGTGCGGCTCAAATATGATCTTACACTTG[A/G]CATACTGGTGGATCATAATTCTCAAACCGCAAAAACCCACATTGATACTTTTAATGAGTA	Y	A	1	1	Y		0.432	0.405	0.486631	0.423	0.469
BARC_1.01_Gm01_43380960_T_C	Gm01	43380960	T	C	CTCGATTTTTTGCCAATATAATATTTCTTTCTCTTCAAGTGTTGCGCTTCACCTCTGCTT[T/C]TGCTTCCTATGCCCATTTCCCGGCTTTTTTAAAATTCTAATTTGAAAACCAACTCATTAT	Y	B	0.965	0.80095	Y		0.474	0.403	0.465241	0.074	0.337
BARC_1.01_Gm01_43413943_T_C	Gm01	43413943	T	C	CTCGTTTTAATTCCCCCTCGCGTCCGTTCCTCTCCTCTCCTATTTATATACCTCACGCTC[T/C]TTCCTCTCCCTTCACGGCCATTCCTGAACCCTTACGGTGATGGATCGAATCAACATGATG	Y	A	0.949	0.949	Y		0.484	0.406	0.443243	0.185	0.367
BARC_1.01_Gm01_43434752_T_C	Gm01	43434752	T	C	ACAATGCGATCGACTCATACAAAGGAGTTGAGTTATGGAATAAGGACAGGGACGAATCTG[T/C]AGGGGGCGCACAGGGGGGTGCTTTGGCCTTTGGGGTCCGTAATTGATGTTATGCAGGCAA	Y	B	1	0.83	Y		0.489	0.41	0.449198	0.326	0.41
BARC_1.01_Gm01_43461285_A_G	Gm01	43461285	A	G	TGTGTGAAGACTCATGCCTTCTACTTCCTACTTCCTATGGATGACCATTTGTGGGATAGA[A/G]GAGTTACCATTGTTTCCATGCGTAGTCTTTGCGGCAAGAATTGTGAATCCTATGATCATT	Y	B	1	0.83	Y		0.469	0.365	0.413043	0.081	0.312
BARC_1.01_Gm01_43509885_T_C	Gm01	43509885	T	C	CGTACCGGCAGATTCGATCACCGTTCGGCCACGCAATGCTTTGGGGTGGCACGATGCAAC[T/C]TGGATCTTGGTGAGAAAAAGAAGGAAGGGGTGCAGGGAAGGTGAAGGGGAAGAGGGCGGG	Y	C	0.949	0.73073	Y		0.135	0.052	0.0894737	0.447	0.213
BARC_1.01_Gm01_43539887_C_T	Gm01	43539887	C	T	GGTTGAGGGACTTGAAAGTCAAAGTATCTGAGTCGACCCCCTGGGCATCACATAATGTTG[C/T]AATCAGAGCGGGGAAGCCGAGTCTGCATGTAATGGACTGGGCTATTTGGGTAATCTGCAG	Y	B	0.824	0.68392	Y		0.405	0.188	0.293478	0.247	0.285
BARC_1.01_Gm01_43576945_G_A	Gm01	43576945	G	A	TTTTTTTAAAAGAAATCACATGTCATTCACATGCTGATGTTAGGGGGAATTAAGTAAGCC[G/A]AAAAAAATTTCACCACAACCGAGTAAAAAAGTTTAACAGTCTTCCAGATATTGACACATG	Y	A	1	1	Y		0.468	0.313	0.420213	0.484	0.456
BARC_1.01_Gm01_43620568_A_C	Gm01	43620568	A	C	CAGACAAATTTGTATGTGCATTCCTGTAAATCAAGTTTGTTCGTAATGTATAGCTACAAC[A/C]TCCACATATGGCATATCCAGTGATATCATCTTGCGCATCTGGCAATAGGTTTGTGTGAGG	Y	A	1	1	Y		0.479	0.302	0.408602	0.437	0.47
BARC_1.01_Gm01_43663728_G_A	Gm01	43663728	G	A	TCGGAATAAAAAGGGGATATATAGTATAGCCAAATTGGGTAGGTGGGAGGGGGACATGTG[G/A]TCTTGGAATTTTGTGTGGCGTAGAGGTTGGTTCGAGTGGGAGACACGTTTTTTTGGAGAA	N	B	0.996	0.82668	Unknown
BARC_1.01_Gm01_43703504_A_G	Gm01	43703504	A	G	TGGGTCATGGTTCCATCTATGCATTCCTTGAGCCACAGTCCTTGCACATTTCAAAGGATA[A/G]ACGTGGCAAGTGCCAACAATATATTGAAAGATGGCTTAAGGAATCCCAACGAGAGGTATA	Y	B	0.436	0.36188	Y		0.307	0.234	0.22293	0.313	0.314
BARC_1.01_Gm01_43729857_A_G	Gm01	43729857	A	G	CTGTCCACTATTCCATTCCTGGATATGATAGAGTTGAGGGTAGCAAGGTTTTAAAAAACA[A/G]TCCACGACCGTGATTTGGATAGCAACATCAAGGTTTATAACTTTCCACGATCGCAATTAG	N	B	0.965	0.80095	Unknown
BARC_1.01_Gm01_43767242_C_A	Gm01	43767242	C	A	GAAGCTTGAGCACAGTGATTTTATCAGCAGCAGTGAGCACACTAAGATGAGAAAGACTAA[C/A]GAGCCAACACCCACTCCAACCCCCACAAAGAGGAGCTTGAACTCGAAGTCCTTGGCACTG	Y	C	0.719	0.55363	Y		0.474	0.303	0.413043	0.258	0.479
BARC_1.01_Gm01_43807558_C_T	Gm01	43807558	C	T	GATGCTCCTTTTTCTTCCTCCACCCCCTTGGTCATGAACTTTGTGGAGTTCCGCGTGTGA[C/T]GGTGGTGTTTAGCTCCCCTAAGTGCGTAAAGAATAGACTCAGACAAGTGCAACGAATCTG	Y	A	0.949	0.949	Y		0.453	0.305	0.423913	0.438	0.435
BARC_1.01_Gm01_43857666_T_G	Gm01	43857666	T	G	AAGCCAAGAAACTTTCCGCCAGACAACTTGGTTTTAAGAAAGTGTAGAAAAGCCCAAAAA[T/G]ATGCTAAGGAAGGTGATCGAGGCTGTACCTGAATCAAATAAACATTAAAAATGCAGTATC	Y	A	0.988	0.988	Y		0.448	0.3	0.424731	0.468	0.445
BARC_1.01_Gm01_43913277_A_G	Gm01	43913277	A	G	TTAGTGAGATGGATAGAACATACTTACGTAATTCTGCTGCGTACCTCGTACCAAATTTCT[A/G]TACCACAAAGTGTACCTGGTTCTTGTAGTAATAATGTAAATAGTGATGAACCACATACCT	N	B	1	0.83	Unknown	Intron
BARC_1.01_Gm01_43953159_T_C	Gm01	43953159	T	C	TCCCACCCCTAACCGCCACCTCACATGCTCCGACCATAATGCCACCTTCGTCGCCATGCA[T/C]CGCCACCACCTCAATTGGATCATTGTCATCCTGATGCAAAAGTATCACTTCAATGCCGTT	N	A	0.9	0.9	Unknown
BARC_1.01_Gm01_43994232_G_A	Gm01	43994232	G	A	TCATACATGCTTACTTCGTAACAACAACATAGCTAGCAAGAAAACCCCGAATGAAACCTC[G/A]CATACCTTGTACAGAGGAATTTTCTTCACTATAGCAGCAACCTTGCTGACAGTATGTGAC	Y	A	1	1	Y		0.484	0.284	0.38172	0.125	0.455
BARC_1.01_Gm01_44030772_T_G	Gm01	44030772	T	G	CATGCTCTCTTCTATAAATCAACAAGTCGAAGGTCAACGTGGATGGAAGAAACGTAGTTA[T/G]GAGGGAAAATCCTACTATAGGTGTCCAGCCAGGTTTTCGGGCGGAGATTAGTCATCAACA	Y	B	0.988	0.82004	Y		0.489	0.289	0.38587	0.395	0.396
BARC_1.01_Gm01_44071626_T_C	Gm01	44071626	T	C	ACCCCGCCCACAGTCGATTTTCCAACCACCGATGAACACTTTCAATTATCCTAAGTTGCT[T/C]TCGTGGGACCTATGTCACCACGTACTCTGTGAGTGTAAGAAGTGGTCTATGAGCTGGCAG	Y	A	1	1	Y		0.495	0.286	0.387097	0.481	0.438
BARC_1.01_Gm01_44099858_G_A	Gm01	44099858	G	A	CTAATCAACAATTCCTGAAAATAATCCTAAGCTATCTTTATCCAGATACACTGTTAACAC[G/A]TTGGCAAGTGTACCAAATTGTCACAAGTAGTAAAGTAAGCGAAAGTCCAAGTGTCGAATC	Y	B	0.757	0.62831	Y		0.495	0.287	0.394595	0.434	0.458
BARC_1.01_Gm01_44140137_A_C	Gm01	44140137	A	C	TATTTTTAGAACACAGTAATAGTTACTCAAATTTTGGGCACAACTTAAAAGGCCTAAGCC[A/C]AATAGATTAGAAAAGACAAAACGTGAGATCGCACACCCCGTAATCCTAGTCCGGCCCATC	Y	A	1	1	Y		0.495	0.286	0.387097	0.45	0.449
BARC_1.01_Gm01_44191460_T_C	Gm01	44191460	T	C	AATAAAAACTAAAAAGTTAGTGGGGACAACTGCCCTCATAATGGTAAACCTATATCCATC[T/C]GTGCTTGAGTCTTATTGGGACTTATTGGGCCTTATTTGGCCTTGATTAGGCATTATTGTT	Y	A	1	1	Y		0.495	0.286	0.387097	0.419	0.458
BARC_1.01_Gm01_44217567_T_C	Gm01	44217567	T	C	ACCTAGAACTTGTCATAAGCAGCTACTTAGGTCAAGCTTAGCCTATTAGACTACTTAGGT[T/C]TATAGGGACAAAAATAGGTCAAGCAACTTGTTAAGGGTCGAACCTTCAAACAAGCTCGGC	Y	C	0.988	0.76076	Y		0.495	0.286	0.387097	0.478	0.441
BARC_1.01_Gm01_44262386_A_G	Gm01	44262386	A	G	CTTCTGGCATGTCTCGGAACTTCACAAATTGCCTAACGATGGGTGCCAAATATCAAAGTG[A/G]TCAAACGAGGGTCACATCCCAACAACGGATGGTCCCCGGACGAAATTAGGGTATGACAGT	Y	B	0.403	0.33449	Y		0.432	0.297	0.363158	0.065	0.268
BARC_1.01_Gm01_44304195_T_C	Gm01	44304195	T	C	CTTTAGCCGGAACTTCCAAAAGACACTAGAGTCGAGCTCATTGACTATTATTGTCAATTG[T/C]GTAAGGCACATCTTTGTGTTCACGAGGTAGAGCACCAAGTGCTCCTCTGGTAGAGTAATC	Y	A	0.949	0.949	Y		0.426	0.284	0.352941	0.021	0.246
BARC_1.01_Gm01_44332781_A_G	Gm01	44332781	A	G	AAATAAAGTAAAAACTCATGCATCCTACAAGAGAAATAAGCCTAAATTCCCTTAGTCCCT[A/G]AGGATTGTCCCTCTTAGGAATTAGGGCAATAAAAGGCGCATTCCCTCCCTTGAGGATCAC	Y	A	0.996	0.996	Y		0.495	0.282	0.387097	0.168	0.466
BARC_1.01_Gm01_44369984_G_A	Gm01	44369984	G	A	TCATGGCCCTGTCGAAGACTTGTACACCTTTTTGTGTCAATTTAGGATGGACCCGACCCA[G/A]ACTCATGGTCCTGCCAAAGAATCTTACATATGTTCGTGTGGATTGAGGATGGACCCGACC	Y	A	1	1	Y		0.5	0.284	0.390374	0.25	0.492
BARC_1.01_Gm01_44403720_C_T	Gm01	44403720	C	T	AAGCGTGGCTGACGTGGGATTATTTTACTTACGTGTCGGCCTATGGTTAATCGTGTTTCC[C/T]GCCCAAAAATGTCTACATCAAGCCTGTGTTTCTAATTTTTTGCTTTTGTTGGTGCATGTG	Y	A	1	1	Y		0.436	0.242	0.335135	0.143	0.276
BARC_1.01_Gm01_44443891_A_G	Gm01	44443891	A	G	CTCGTCCCTTTCGGTCCTTCGAAGCTTGAGCTCATTGTTACTGCCCTATAGAGCCCCTCA[A/G]AACTTGTTTCTGTCATATTCTTTTTTTCGGGGGCCGTAGTCACGTTGACATCCTTTAGCT	Y	B	1	0.83	Y		0.432	0.247	0.336898	0.063	0.464
BARC_1.01_Gm01_44485137_C_A	Gm01	44485137	C	A	TATACACTCCCCTCTTAATTGCACGGAATCGTCATGTTCCCTTTAACCAGTTTGAGTTCA[C/A]CATGGTTGGCTTCATTCTATGCATCCTTCAATCTGATCTCGCCAATTCGGTCAAAAACAA	Y	B	1	0.83	Y		0.432	0.25	0.336898	0.126	0.273
BARC_1.01_Gm01_44516588_G_A	Gm01	44516588	G	A	AGAGAACATGCAAATTGATGCAAATTGTTCTTGGCTGCATGGATCTAGACCTCACATTAA[G/A]GATTGAGAAATTCTTTCTCTTACAAATTCTAGTACCTCTGAACAGAGGAAACTTCATGAG	N	A	0.638	0.638	Unknown
BARC_1.01_Gm01_44544214_A_C	Gm01	44544214	A	C	CCCATTTTTGCATCTTTGAATAAAGAGTGAGTCCTGATATCACCTTTTTCCTTCCAGACT[A/C]TGTTGCATCTCTACCATTCTGGAATTTTGTATCCTTTAAAAGCATGATATAGCCTAGTGT	N	A	0.988	0.988	Unknown
BARC_1.01_Gm01_44606095_T_C	Gm01	44606095	T	C	TGCGTCTGTCACCAGGTTGTCCTTACCAGGCGTGTACAATATCTCAAAATTAAACCCCAC[T/C]AGTTTGGCAAGCCATTTTTGTTGAGTTGGGGTCTGAATGACTTGGTTGACCATGCCTCGA	N	B	1	0.83	Unknown
BARC_1.01_Gm01_44644448_A_G	Gm01	44644448	A	G	AATTTTGGGACATATAAAGTGCAATGTTGATGTTGGATTCTTCCATGATTGTAATGTTAC[A/G]GGGGTGGGGTGTTGTGAGAGATCACGATATATGGTGCTATGCTACTATTGTTGGCTGCAT	N	B	0.996	0.82668	Unknown
BARC_1.01_Gm01_44673778_A_G	Gm01	44673778	A	G	AAACTTTTAATTAAGTTTGATTTCTTATTTTTTTTATTATTAGTACAAATGTATGGGGTA[A/G]AGGGTGTCACAAACACCCCTTTGTCTGAAGAGGAGGTCAGCCAAGCCTTAGAAGAATTCA	Y	A	0.799	0.799	Y		0.089	0	0.0418848	0.372	0.155
BARC_1.01_Gm01_44715656_C_A	Gm01	44715656	C	A	TTTTTCTGGTCCAAAGATTGATTCTTAAAAATAATGGAGTTCCTAAGCACCAAAGGCTCC[C/A]CACCACTGCATGCCAAATTACCTTCCATCTTTTGTTGCTGATCGAATCAACTCCCTGGAA	Y	A	1	1	Y		0.104	0.232	0.160428	0.166	0.17
BARC_1.01_Gm01_44764154_C_A	Gm01	44764154	C	A	ATTATTGCAGGTAGTTGAATACAGCGGTCAGAAAGACTAATCAACAGAACGTGAAGTCGC[C/A]ACGAAGAAAAAACCGTTGATATGTGAGCTAGTACAACTTGGTTTTTGTAAAATACTCGAG	Y	A	0.935	0.935	Y		0.079	0	0.0374332	0.118	0.067
BARC_1.01_Gm01_44790492_G_A	Gm01	44790492	G	A	CAGGTAGGTCATCTTCTCCATCTCCGACAATCGTCTTGTCTTCGTATGATAAGAAGCACG[G/A]ACGCGGCTCATCACCGGCGTGTCCCGCGTCGGACTCGCACCAGACACGCATGCGGGTACG	Y	A	1	1	Y	CDS	0.104	0.247	0.166667	0.495	0.285
BARC_1.01_Gm01_44835208_A_C	Gm01	44835208	A	C	TTCCTTGGCAGTTTCTTTCATGGCCTTCTCATAGCCACCAAAATCAAGCCATCTCAAATA[A/C]GGAATAGCGTCTCCGACGGTGAACACGCCCGCCAGACGCATGAACTCATCCACAGCCTTT	Y	B	0.787	0.65321	Y	CDS	0.191	0.245	0.213115	0.219	0.412
BARC_1.01_Gm01_44857606_G_A	Gm01	44857606	G	A	GAAATGACATGGTGATTAAAGTATACTTAGGATTAGGCTTTATAATTAAGTGTTGTGAGC[G/A]AGTAACTATGGAATGAACAGGTACACTTTGTGGTAGTTGAGTCTGGGTAGAAGAGGCAAA	Y	C	0.9	0.693	Y		0.074	0	0.0366492	0.199	0.088
BARC_1.01_Gm01_44883585_C_T	Gm01	44883585	C	T	GAAGGGGGAACACTTCCGCAATAGTGAAATGCTCTGCAACAAGCTTTGAGAGCAAGGAGG[C/T]TCCGTTCTGTGACAGTGCATTAGCAACCACTCCAACTACTGTTAACTACTCTGATTCAGG	Y	A	0.9	0.9	Y		0.083	0	0.0416667	0.168	0.083
BARC_1.01_Gm01_44947279_T_G	Gm01	44947279	T	G	GCTTGCTACGATCATGCTTCTTGTCTCTATCGGTGGAGATTCTTTTTTTTATGGGAGGGA[T/G]GGTTGGTTTTGGTGTGGGTCAGGGGCATAATTGTGTTGGCCCATGTTTGGGTGTTTAACT	Y	A	1	1	N
BARC_1.01_Gm01_45022636_G_A	Gm01	45022636	G	A	TCTACGTAAAATAGGAACATAGGATATTGAAAGATTTGTTTTTGGTCTTATAGCTTGTTC[G/A]TAGGAAGGATTTAAGGTGAATGTTTGCTGCATTTGTGTTACATGGTGGTGTACGTGTGGT	Y	A	0.9	0.9	Y		0.094	0.202	0.139785	0	0.103
BARC_1.01_Gm01_45064727_A_G	Gm01	45064727	A	G	ACCAGGACGATGTTTGGCCTGGGGTATGATGATCAGCTTGTGGTAGATTATGCCGGAATG[A/G]ATTCTCGGCATGCCAGATGGCTACTAGGCAAATAAATTCGCATTTCTTCGTAGCATGTCG	Y	B	0.897	0.74451	Y		0.153	0.042	0.0904255	0.299	0.167
BARC_1.01_Gm01_45094943_A_G	Gm01	45094943	A	G	AACATTGATTCTCCAACAGACAAAGAATCGGCCTTACCATTGTGGCCATCTATATTCTCA[A/G]CAATAAAAGGGAAACCATGATAATTATTATTCCCTGAAGGGCAACAACACTTACCATATT	Y	B	1	0.83	Y		0.153	0.042	0.0904255	0.284	0.162
BARC_1.01_Gm01_45165995_A_C	Gm01	45165995	A	C	AAGTGACCACGACCTTTGGCCTGAGCTGCTTCACAAAATGAAGAACAGAAGGGAACAACG[A/C]TGGATAGTTTGTGAAGCTTGAAACCGGCATATTCACAGCAATTGCCTCGTTATCAAAGAA	Y	A	1	1	Y	CDS	0.094	0.203	0.139037	0.454	0.252
BARC_1.01_Gm01_45191939_A_G	Gm01	45191939	A	G	TGACCTTCCCGCCACACCAATACCTCCCCTTCCCGTTATGGTTGGAGACAGTGGTGTTCT[A/G]CAATGCACCCACCGTTACCCACAAGTCCAACTTCAGATACAAGGGCACAACTTCACCATT	N	B	0.976	0.81008	Unknown
BARC_1.01_Gm01_45232229_G_A	Gm01	45232229	G	A	ACCAAATTTTGCATCTTATATTTTTCTTTATGAACAAGGTTTTAAATCATGGTTGTGGTC[G/A]CGATTGCAGTTTCGTTGCAATCCTTGATGATGTGGTAATTGTGGTCACGGTGAGTCAGTG	Y	C	0.772	0.59444	Y	Intron	0.042	0	0.0208333	0	0.014
BARC_1.01_Gm01_45254689_G_A	Gm01	45254689	G	A	TGCCTTGGGCGTGACCAGACCCAGGTTAGTGGGCCAACGGTTAAACAACAAACTCATTCG[G/A]GTTGTACTAGGTTACACCAGGTTCAATGCATGATTGATTCAATAGGTAACTTGACTAGAC	Y	C	0.976	0.75152	Y		0.042	0	0.0208333	0.146	0.063
BARC_1.01_Gm01_45295402_A_G	Gm01	45295402	A	G	CCCCCTTTGTTTGACGACCCAGATTCGTATTTTCCATACTCATCTCGTGAAACAGTGTAC[A/G]GATCCTCAAGGCTTTTTAGAGTTTAGGCCGAAGTTGTTGATGTTCGCAGTCGAAGAGGGG	Y	A	1	1	Y		0.042	0	0.0208333	0.37	0.223
BARC_1.01_Gm01_45358555_G_A	Gm01	45358555	G	A	GCACCCTGATCGTGTCCGTGCTACTAGAGTCAATGTGATGATCAAATAATACTTTGGACT[G/A]GCTTCAACAGGTTCCCACACATCTACGTTGATCGGCCCAAAAGAGCTGGATTGAATCAAA	Y	C	0.704	0.54208	Y		0	0		0.018	0.006
BARC_1.01_Gm01_45391073_A_G	Gm01	45391073	A	G	AGATTTTTTTGTTGACCACTAGATTGATGAAGAATCTCTCCAAAATCTTCTTTTTGATCA[A/G]TGATTCACTGACCACTAGATCTAGGGATCCCACATTATTCTCAACCTAATGGCTAGGTTG	Y	B	1	0.83	N
BARC_1.01_Gm01_45435887_C_T	Gm01	45435887	C	T	TTCTGGTTGCAGAGACAATTCATGCTTTAGCTCCAGTAGAAAGGTGAAAGTTGGCACAAA[C/T]AACATGAACAATTTTATGGTGCCGGTGAAGGACTCCGAAATGCGGGATAACGCGTCCGCA	Y	B	1	0.83	Y	Intron	0	0		0.019	0.006
BARC_1.01_Gm01_45463910_G_A	Gm01	45463910	G	A	AAAAATGTAAAATGTGTCTTCACATCTAGATACACATCTCCATGAAGCCTCCAAAGACGC[G/A]GGACTACCTCCCAACCATCTACTACTCACGTATGTCAAATACAAGATCTTCACAAGCACA	Y	C	1	0.77	Y		0	0		0.011	0.004
BARC_1.01_Gm01_45503138_G_A	Gm01	45503138	G	A	ATTTTTTAATATATACTGGGTCACACCGGACCAATTATTGGCCCACCAGTTGGACCACCG[G/A]CCCACTACCTCAATTGGATCAATGACTTAAGGCTTTGGTTATGTGTATCGAGTGGCCAAA	Y	C	1	0.77	Y		0	0		0.234	0.259
BARC_1.01_Gm01_45562356_G_A	Gm01	45562356	G	A	ACCAATTACAAATGTCCCTATCCAAATGCCGTACCAACTAATTTTGTCTACTTTTGAATT[G/A]TTCAATTTATTATTAATTAGTAATGACATCATACTATAGTCTAATCTAGCTTCAGCACTA	Y	C	0.841	0.64757	Y	Intron	0	0		0.024	0.008
BARC_1.01_Gm01_45585210_T_C	Gm01	45585210	T	C	CTGTGATTGCATCTGTGATTGAAACTGGGACTGCATCTGGCTGAAGGATGACATCATCCG[T/C]CGAGTCACTTTTTCTATGATCAACTCCTCCAGCTGGTCCTTGATTTGTTGAGTCAGCTGC	Y	B	0.434	0.36022	Y		0	0.181	0.0851064	0.258	0.147
BARC_1.01_Gm01_45665752_G_A	Gm01	45665752	G	A	TGATTACTCATTTAATTAATTAAAATACAAACAAAAGAATATGCATGGCCAGGGAGAGAA[G/A]CACACAAAGAGACAAGGAATTGGAAAAGTTAAAAGCAGAAACCAAAGTTGATACACACGA	Y	B	0.965	0.80095	Y		0.01	0.221	0.111111	0.063	0.392
BARC_1.01_Gm01_45733650_C_T	Gm01	45733650	C	T	CTCAAGGTCATGAAGGGCTTTGAACTCGGACCAGTCTTCCCACGAAGAATCCTCTGGTGG[C/T]AGTCCAGCCCATTGCACTAGCACCATGAGTCGTGGCCCCGCGTCCGAAGGAATAATCTTG	Y	A	0.915	0.915	Y		0.01	0.218	0.111111	0.063	0.391
BARC_1.01_Gm01_45786200_A_G	Gm01	45786200	A	G	GCGAACGAGCAGGCCAAATTGCTGAGGGATGGGCCCAGTAAGCAAATTATCATAGAGGTC[A/G]ATAATGTTGAGGTAGGCGCACATTATGAGCACCGGGGGGATGACCCCTTGGAGACTGTTC	Y	A	0.839	0.839	Y	CDS	0.01	0.221	0.111111	0	0.078
BARC_1.01_Gm01_45818591_T_C	Gm01	45818591	T	C	ATTAACGACACTAGTTACAGGTAGTCCATCAATCTTGGGGCTCAACATCAAGACCACATC[T/C]TCTAAAGTTATGGTTGTCTCCCTATGTGGAAAATGAAATGTGAGTTTTGGGTCTCCAATG	Y	C	1	0.77	Y		0	0		0.375	0.12
BARC_1.01_Gm01_45869690_A_G	Gm01	45869690	A	G	GTTCTTCGTGTCCTCTCGCACCTTAACTCTCGTTCTCTATCTCACGCTTCTGTTCTGCTC[A/G]TTCTCTCTCATAGTGGTTGTAGGTTTCTCAATCTTTGTTCTCTCTCATGGTGATTTTAGG	Y	A	0.976	0.976	Y		0.188	0.047	0.115183	0.302	0.312
BARC_1.01_Gm01_45893818_A_G	Gm01	45893818	A	G	AACACTATCAAAACCACCACAGCAGTGACATCTAAAGAAGCCAACTTGGGCGACAACAAC[A/G]GCAACAGCGAAACCACCGCAAGGACTCTCCCTTCCAAGCCAACGGCAGCAACACATTTGC	Y	B	0.797	0.66151	Y	Intron	0.188	0.047	0.115183	0.306	0.309
BARC_1.01_Gm01_45922658_A_G	Gm01	45922658	A	G	TTACCAGTGTACAAGACACAAGGACCGGTGGATATAAACTGGGCTGACCCACCAGGGTCT[A/G]TATTGGCATGTGGTTGGGGACAGAACGGATGGTCAACGGTGACCAGTTCATCGTCCATAT	Y	B	0.915	0.75945	Y		0	0		0.17	0.056
BARC_1.01_Gm01_45975397_C_T	Gm01	45975397	C	T	CTTTTCTTTTTGGGCTTTTAATAATTTTCTCTTATTCCCTTTACGGGAGTATACAAGCCA[C/T]GAAGTTATAGAGCATGTTTTTTGGGCTAATGGGCCATTTGTAATGGGTGAATCTAGCTTG	Y	A	1	1	Y		0.198	0.271	0.231579	0.12	0.418
BARC_1.01_Gm01_46003669_C_T	Gm01	46003669	C	T	CGAGGTTCGCTAGTTTCTTGATACGACCCATCCACGCCTCGACATACCATTGTTTAGTCC[C/T]CGTCGGAATCTCGAGGTGCACCGATGACTGTGATCCCTCAGACCTGGGACTCGCATTCTC	N	B	1	0.83	Unknown
BARC_1.01_Gm01_46056191_T_C	Gm01	46056191	T	C	ACAGTGCCGAATTCCATCCACTACAACGTTCACCGAAAGAGCTATGAATGGTTTCTCCTT[T/C]GTGCGTACCAGAACCCGCGCGATGTCCATCCTCACCTTATCCTCCGTTGCCGCATCTAGC	Y	B	0.9	0.747	Y		0	0		0.382	0.21
BARC_1.01_Gm01_46104058_A_G	Gm01	46104058	A	G	ATGATCAACACATTTTTGTTCAACATTCTCAAACACTGAGATAGCATTCTCAATGCTACC[A/G]CACTTCGAATACATGTCAATTAGAGCAACACCAAGCTTACCATTCAGAGAATACCCCTTC	Y	B	0.868	0.72044	Y	CDS				0.022	0.022
BARC_1.01_Gm01_46149225_T_G	Gm01	46149225	T	G	CAATGGAGATACACAAGAATGTTATCATTCATCCTATTATAAACACGCACAGTATTCTTC[T/G]GGCTAAAAAAGCCATCATCACTCAGACAATCTTGAACACTATTAGCCTTCTCTCCCATTT	Y	A	0.614	0.614	N
BARC_1.01_Gm01_46183038_T_C	Gm01	46183038	T	C	ACAGCAGCAACCGTGCACCCAGCTGTGACGACCCCACGGCCCGCACGCACGACCCAGCAG[T/C]GACGAACATCGACACACGGTCCTGCACCCGCACGAACAGCAAACATCGACGGCATTACCT	Y	B	0.75	0.6225	Y		0.182	0.047	0.110526	0.063	0.389
BARC_1.01_Gm01_46228737_T_C	Gm01	46228737	T	C	CAAAAATATGACATAACCATGATCCGTTTAAAAAAATTGGTCCGTAACCTGCGCCGACTG[T/C]AGGCCCCGCGAGTCATTCTACGAACTTGAGTCCGTTTACCCACCCTAAAAATAACATAAT	Y	C	0.949	0.73073	Y		0.188	0.047	0.115183	0.242	0.331
BARC_1.01_Gm01_46267411_A_C	Gm01	46267411	A	C	TTTTCCAAATTTTGTCCCTCGCTATCTCAGTTCTAGTGAAACCCCAACGTCATTGTCGTC[A/C]CTGCCTCTTTAGATCCCTTATGTCGCCGCTTAAGCTCCTGTAGGACGCCGCCACTTGAGC	Y	B	0.877	0.72791	N
BARC_1.01_Gm01_46305785_A_G	Gm01	46305785	A	G	AGGTGGCCAAGTGCCTTGAAGACACCATTGCCGACAAGCAGATCGAACTCGACCGTGTAT[A/G]AGGTTTTGCCGCCGTCAAAACAGCCTCATCAACCTCGTCCACAAGCTCCTTGAACAGCTC	Y	B	0.759	0.62997	Y		0.188	0.047	0.115183	0.094	0.381
BARC_1.01_Gm01_46357077_A_G	Gm01	46357077	A	G	CATGGGCAAACGGGTCACAGCAGCTACACTTCTTCGAGATGGCACACAGGTCACAACACG[A/G]GTGACCTCACTATGCGTACTCACGGTGCGAGCTCCACTGCACACAATGGATGTTGGCGAG	Y	C	0.543	0.41811	Y		0.432	0.495	0.266667	0.073	0.472
BARC_1.01_Gm01_46362865_C_A	Gm01	46362865	C	A	ATTAAACTCAAATCAAATAATAAGTTTTCTTCAAAGAATATTTATTGTTAAACCATCTCA[C/A]AGCATGTCAATAATACTATACATATTAAATTGCGAATAATAATCTACGTAAAGATAATAA	Y	D	0.549	0.36783	Y		0	0.197	0.0952381	0	0.066
BARC_1.01_Gm01_46461009_T_C	Gm01	46461009	T	C	CTATGCCTTTTCCTTTCAGTGATTCTCAAAGCAATACACAATGTTTTCTTTTCTCCTCCC[T/C]TTCCTCTAGGGCCTCACAAATCCAGCTTTAGATTGCTACGACAATACCTCACTGATCCAA	Y	C	0.791	0.60907	Y		0.011	0.229	0.117021	0	0.08
BARC_1.01_Gm01_46500880_A_G	Gm01	46500880	A	G	CAAAGTCATTTGCTTCTACATTTTCAACCCAAGTCTAGCCATGGGCCCCAATCAGTAGCT[A/G]CCAATTTTGCCATGCTATCCTACCCAACTCTAGCCTCAGTAGTCTTTCTGACCTAAGAGG	Y	C	0.768	0.59136	Y		0.188	0.047	0.115183	0.271	0.322
BARC_1.01_Gm01_46524387_T_C	Gm01	46524387	T	C	AATAAAATATTCTTCTTCTTCCAACACTTGGAAGGGTGACGGTGATCGGTTGCGCCCTCG[T/C]TGCGGTGGTGGATGGCAGGGGTTTCGATGACAGACATTTAGGAGGCGCTGCGGCCGCCGA	Y	C	0.738	0.56826	Y		0.188	0.047	0.115183	0.36	0.283
BARC_1.01_Gm01_46534870_A_G	Gm01	46534870	A	G	ATGGAGATGCACAGGAATGCTATCATTCATCCCATTATAAACACGCACATGAGTCGTCCC[A/G]CCATAAAAGGCATCATCACTCAGACCATCTTGAACACATACAATAATCAAGAACACAATA	Y	A	0.719	0.719	Y	CDS	0.198	0.266	0.231579	0.404	0.289
BARC_1.01_Gm01_46539971_T_G	Gm01	46539971	T	G	TAGCATGAAAACGATCACATACAAAGGCCCAAAGATCTCGAAGTTTAGGGAGAACATCTT[T/G]CAGTAATGAAGATGAGGAATCCCTTTGTGGTGGTGGTGGTAAGGGTGTACGTTCATGAGG	Y	A	0.691	0.691	Y		0.01	0.224	0.111111	0	0.081
BARC_1.01_Gm01_46545441_G_A	Gm01	46545441	G	A	TAGTGTTATATATAGTAACATTATTTATTTTATAATATAATTGGTCTATTAGTTAAGTTG[G/A]TTTGAGCTAAGGCTTATGAATTGGGCTCATATGGATCAGTTAATCTGTAAGCCTCATACG	Y	B	0.741	0.61503	Y		0.198	0.272	0.234043	0.195	0.429
BARC_1.01_Gm01_46552178_G_A	Gm01	46552178	G	A	AAGTTTAGGCTATGGCGAGGTTGCCTTGGGTTGCGGTGAGGTTGGCCATGGCGGCCTCCA[G/A]GCGATCCAGGCTGGCGGAGGAAGGTTCAACATCTGCCATTTAAGAGCGGTAGAGAAGGGG	Y	B	0.738	0.61254	Y		0.198	0.271	0.231579	0.303	0.391
BARC_1.01_Gm01_46569624_G_T	Gm01	46569624	G	T	GATTAAATATACACTCCCGTTCGATTTCAGGGGTAGGGGCAGGGAGGGAATTGGGGAGTC[G/T]GAGCGGGGGTGGGGTAAGCAAAATCCGACCCTGACCCGCCCGTTGTCATGCCTACTTGTT	Y	B	0.708	0.58764	Y		0.013	0.239	0.133333	0.353	0.329
BARC_1.01_Gm01_46570718_A_G	Gm01	46570718	A	G	AAATTAGGCCTCCGAGCCAGCACGGCCAGGCTGACCCAAATTTTATGACAGATTTGGACT[A/G]TTGCTACGCGCATCCTGCACAATTGTTGGTACACCCAACACAACAACACGATTCCCATTT	Y	A	0.949	0.949	Y		0.013	0.236	0.130952	0.412	0.23
BARC_1.01_Gm01_46576572_A_G	Gm01	46576572	A	G	GTTCCATATAAATTTCCTCCTCAAGGTCACCATGAAGGAAGACATTTTTAATGTTAAACT[A/G]ATGGAGGGGCCAATGACGCATGGCAGCCATAGCAAGAAATAGACGAACGGTGGTGATTTT	N	A	0.408	0.408	Unknown	Intron
BARC_1.01_Gm01_46579445_G_A	Gm01	46579445	G	A	GCAGACCAAGACAAATAGTTTTTTCAGTTGAGTTTTGCAGTAGTGATGGTGGGAGTCCCA[G/A]AGAAGGAGAAAACAGAACCAGAAGAAGCCATTTTTTACCAAAAGAAAGAAACCCTAACGG	Y	B	0.654	0.54282	Y	Intron	0.189	0.271	0.227513	0.438	0.35
BARC_1.01_Gm01_46594229_G_A	Gm01	46594229	G	A	GGCTTCGGGACCTGAGGGATACCTGGCTCGGGGACTTGATGGACATGTCTGGGCTGCATA[G/A]CAGGTGCATCTGGCGGAGGATATGATGGTTGGACCACGGTCATGAATAGATGAGAAATGC	Y	C	0.854	0.65758	Y		0.198	0.271	0.231579	0.216	0.422
BARC_1.01_Gm01_46595988_G_A	Gm01	46595988	G	A	CGTCAGAATCATCACGATCCCCTCTCCCTAGACCTCTGCCACTAACCCTACTTAAGACAG[G/A]ACCTAGGCCTCCAGTCCTAACCATGATCTACAAATGTCTACCACAAATTCCATCACTGAT	Y	C	0.648	0.49896	Y		0	0		0.075	0.025
BARC_1.01_Gm01_46598535_A_G	Gm01	46598535	A	G	CATGGAGATTTTCACAAGCTCATTTTTTAGCCCAGGCATGTTCACGTCGATGGAGGAGAC[A/G]AAAAGTGTCATCGTCATTCTTGTCGGTGCGGCTTCTTCACGTTGGTGATGGATCTCGACG	Y	A	0.996	0.996	Y		0.198	0.271	0.231579	0.428	0.3
BARC_1.01_Gm01_46609931_G_A	Gm01	46609931	G	A	TCCACGGCTCGCGGATTTCTGACACCCATTTCCCCCAGTTCCGCATCCGCACGTCGTGGT[G/A]CAAAGGGTGCTTATTGCTCAAGTCCTCATCGACGCCGCCATGAATGCGTTTTATCTTTTT	Y	B	0.854	0.70882	Y		0	0.186	0.0899471	0	0.062
BARC_1.01_Gm01_46613274_C_T	Gm01	46613274	C	T	CAGGTATCAAAAACCTGGAGACACAATTGGGCCAGCTAGCCCAGGAGAGGGCTGAAAGGA[C/T]CACAAGAACTTTTGGGGCTAATACTGAGAAGAACCCAAGTGAAGAGTGCAAAGTGGTAAT	Y	C	0.599	0.46123	Y		0.198	0.271	0.231579	0.083	0.464
BARC_1.01_Gm01_46617669_C_T	Gm01	46617669	C	T	GGTGCGCTTAGCGGCCACATGCGCGCTAAGCGTGCACGTCATAAATTCTGGGGAGTTTTT[C/T]GAAACCCCCCAACCCCTAAGTTGCCTCCAGGGGGGCTTTTTAATTTGAGAAACTCTCGTT	Y	C	0.587	0.45199	Y		0	0		0.039	0.013
BARC_1.01_Gm01_46620989_T_C	Gm01	46620989	T	C	AAAATCCTTGTGGTACGACACTCGGCTTACCGAGAAATTATTACTACGAGCGATTTGGTA[T/C]ACTTGCCAAAGAGCTAACAACTCTCATTGTTTAATTAACTCGGATTGGTGTTCGGAAATC	Y	D	0.791	0.52997	Y		0.198	0.271	0.231579	0.4	0.291
BARC_1.01_Gm01_46633591_C_A	Gm01	46633591	C	A	GCAATTTCCAGTTTTAAAGAAGTTGCCCAACCCGGGTACAAAATCACACAACAAATTCTT[C/A]TATGTTCCAAAATGTTAGTATTTAACGTGAAGTAATAGTAATACTTATATACGTATGCAG	Y	B	0.889	0.73787	Y		0.198	0.271	0.231579	0.104	0.455
BARC_1.01_Gm01_46667259_T_C	Gm01	46667259	T	C	GTTTTACTAAAAACTGTTGTTATAGATATTCATTAATATCAGTTTTGGTAAAAATCGATG[T/C]TGATTTGTACATATTTGACTTTCATTTTTTGTTATTTCTTACTGTACAACATCGATTTTT	Y	C	0.429	0.33033	N
BARC_1.01_Gm01_46669875_G_A	Gm01	46669875	G	A	CTCGAACTAACCTTCATAGAAAAATTAAGGAGATGTTCGACTCTTTCTCGTGACAATACT[G/A]GAAGGGCGATGGGGACTAAGGGAGACAGGGGCGTGGAGGGGTTGGCGGAGAGGGTGGGTT	Y	C	0.965	0.74305	Y		0	0		0.207	0.068
BARC_1.01_Gm01_46672210_C_A	Gm01	46672210	C	A	GAGTGTCACGTCACCATGTCTTGTCATTGACACCTCAATGCCATGTCATCACCTTCTTTC[C/A]TTTTTCCCCTTCTTTCCCTTCTCTAATGGAAACTATGACCATCATGTCATCACCACACTG	Y	D	0.832	0.55744	Y		0.198	0.274	0.232804	0.247	0.407
BARC_1.01_Gm01_46673286_G_A	Gm01	46673286	G	A	TCAGTGGTGGCGCGGTGTGGTCAATGGTGATGGTGCGGTAGTGATGATTTCTGTTGGAAA[G/A]GGGAATTAAGGAGATGATGTGACATTGAAGTTTTAGTGATAAGATGTGATGATGTGACAC	Y	B	0.976	0.81008	Y		0.01	0.226	0.111702	0.096	0.114
BARC_1.01_Gm01_46677080_A_G	Gm01	46677080	A	G	CATTAAGGTCATTAGTGACGCCACCGCCTCCTTTCCCGCCAAGTGGATCCCTGAAATTTT[A/G]TTGTTGGCTGCCTCTAAATGAATGAGGTATGACATGAAGGGTGAACACGTATCTCAGAAG	Y	C	1	0.77	Y	CDS	0	0		0.205	0.068
BARC_1.01_Gm01_46683239_G_A	Gm01	46683239	G	A	GGTTGTCGCCAGCGAGGAGGTGGAAAAGAAGTAGCTGCCGTTGTTGTTGGAGAAGAAGTC[G/A]TTGTCATAGTCGTTGGTGAAGAAGTTGCGGTCTGGTGGAGGAGGACGTAGTTGGCAGAGC	Y	C	0.878	0.67606	Y		0	0		0.25	0.083
BARC_1.01_Gm01_46698643_A_G	Gm01	46698643	A	G	GATCCACTGTGGGGGGAAGTAGGTGATGGACCAACGAGTAACCTTAATGGATGCGCCACT[A/G]ATGAAACCCTGAGAGAGAAGAACAAAGATGAAAACAAAGAAGAGGGGTGGTGGAAACAGA	Y	B	0.915	0.75945	Y		0	0.182	0.0846561	0	0.063
BARC_1.01_Gm01_46702941_C_T	Gm01	46702941	C	T	AGCAAAGACAAAGAACAACACCATCATGTACATTAGGTATATCACTTGACTAGCCAGGGG[C/T]TGTAGAGCTTCGACGGAATCATGTAATATTATCATTTTATTTCCTTTTGTTGGTTAATTC	N	C	0.723	0.55671	Unknown
BARC_1.01_Gm01_46731753_T_C	Gm01	46731753	T	C	AGGTTCTTCTCAGCCTATCCGCCGCGCGCCGCCGCCAAACTCCAACGAAGCACCCGTCGC[T/C]GTCGTGCTATTGCAGGTTAGCCGCACTTGTTTCATGATTCCTTTCGTCCTTTGTTTATCA	Y	B	0.897	0.74451	Y		0	0		0.374	0.122
BARC_1.01_Gm01_46741651_G_A	Gm01	46741651	G	A	ATTAAAAATATATCTACCTTAAATTTTAATTAGAATATTTCATGATCTTAATTTACTTGA[G/A]ATTAATGAAAACTATATTTTTATTTTCTCACTTCTGAAGAGTTAGCGTTAACGAATGATA	Y	B	0.45	0.3735	N
BARC_1.01_Gm01_46763425_C_T	Gm01	46763425	C	T	AGACTCAGGACACTCCCTTCATGCTGACCCGTGTCCCTCCAGAACATCAACACCCTCCCA[C/T]GGTGACACCTTCCACACATTTTATTACTCCCACTTGGGTTACAGGCACGAGTCACCATGC	Y	C	0.839	0.64603	Y		0.229	0.125	0.177083	0.5	0.279
BARC_1.01_Gm01_46765711_G_A	Gm01	46765711	G	A	TTGATTTTTAATAACCGAAGATGACGTATGTTGTAAAATCACATTTATAACATGCTCGGG[G/A]AACATGCAATAAGTGATCCTTTATTTGAGGAAGAATTATTATACCTTAACTTAGCCTAAT	Y	C	0.868	0.66836	Y	Intron	0.198	0.234	0.21164	0.063	0.457
BARC_1.01_Gm01_46767033_A_G	Gm01	46767033	A	G	AGGCAGAGGACCACTGGCAATGGCCAGAGAAGCATTTCAGGTCGCTGGAAGGAGGAATTG[A/G]CAGCAGAAATTGAAAACTGTGGCTGAAACATGATGTCAAGTTAGAAAAAATCCCCAGAGA	Y	C	0.915	0.70455	Y	Intron	0.198	0.234	0.21164	0.468	0.302
BARC_1.01_Gm01_46771132_T_C	Gm01	46771132	T	C	AACCCATCTAAGGATCTCACCGACAAGTAACAAGGTAAACAAAGATGCAAATTTTAGTTT[T/C]ACACAAGAAGCTGCTTCACTTTATCAGCAGAGATCCATTAGGGACTTTAGCTTTGCAACA	N	A	0.935	0.935	Unknown	Intron
BARC_1.01_Gm01_46793960_G_A	Gm01	46793960	G	A	CTCCTCGCTTAGTGGCCAACTTAGGCTTACTGCGAAGAAGACTCATGAAGAATCCCAAAG[G/A]CGCGCTTAGCGCGAAAGCCCGCGCTAAGCGCGAGGTCTTGTGGAAATTAAGCTACCTTAG	Y	C	0.768	0.59136	Y		0.052	0.042	0.046875	0	0.047
BARC_1.01_Gm01_46798866_C_T	Gm01	46798866	C	T	TAAAATTCTAGCTAAAGAATCTTTGAAGTTTTTTGTTAATTCTTTTTCTTCTTCTTATAA[C/T]TGTCCACTCTTTGAGTGTGAACTCGGCACAGTGGTAAAAGTTGTGTCTTTGGGTTCGAAT	Y	C	1	0.77	Y		0	0		0.121	0.039
BARC_1.01_Gm01_46803788_G_T	Gm01	46803788	G	T	GCACCCCCAGTGCCCTGTTTGCAAGGATGACATATGCCACACCACTATGGTTCCTCTATG[G/T]CCCTGGCAAGGGCATAGCTCATAGTGACCGTGATGGAAAGGCATCATCATCCTATAGAGG	Y	B	0.839	0.69637	Y		0.052	0.042	0.046875	0.321	0.136
BARC_1.01_Gm01_46827907_A_G	Gm01	46827907	A	G	GTCTTACAAAAAAGTTCTACCATGGTTGTGACGCTTCTTCCTCTTCCACAATGTTGAAGC[A/G]TCGTTCGAGTTCCAGTTCAGCTACTCCAAGACGCCGAAGGTGAAGCCGATCGCCATCCGC	Y	C	0.758	0.58366	Y		0	0		0.307	0.218
BARC_1.01_Gm01_46833359_C_T	Gm01	46833359	C	T	CTTCTACTTACGCACACTTCTATTTAACTGCTATTCCATTATTTTTTTATTTTTTTTACT[C/T]TGTGTGTAGATCGTGATTGAATTAGCGAACTTTAAAGAAGTAGTTTACCAATTTAATTAT	Y	B	0.935	0.77605	Y		0.052	0.042	0.046875	0.247	0.284
BARC_1.01_Gm01_46841836_T_C	Gm01	46841836	T	C	CCGTACTACATTCTATATTTTGGACATTACAGGTATCCAGTGTCCATGTCCATGTCATGT[T/C]CGGTGTCTGTATCGATGTCGGTGCTTCATAGGCTATAACACTCAGAAGGACAAATGGTTC	Y	C	0.652	0.50204	Y		0.052	0.042	0.046875	0.092	0.334
BARC_1.01_Gm01_46855225_G_T	Gm01	46855225	G	T	TATAGCAGTAGCAACAATTTCGCCACTCTGACTGGCAAAAACTGCATGATGATGATGCAT[G/T]GGCTAATTGAAGGATGCATAGGATGGATGGTGCATGGTGGGCATGGGGTATCTTGCCAAT	Y	C	0.949	0.73073	Y		0.484	0.161	0.319149	0.484	0.377
BARC_1.01_Gm01_46856632_T_C	Gm01	46856632	T	C	AACACACATCTTTGACTTTGTTGCAGAAATAGCAAGCCTCGAACTGGTAGAGAACGATGT[T/C]GTTCGGGAGAACCTTTGGCGGTGAGGGCTCCTTGGCGAGGACTTCCTGACAAACTAGAGC	Y	C	0.516	0.39732	Y		0.052	0.042	0.046875	0.042	0.351
BARC_1.01_Gm01_46862648_T_G	Gm01	46862648	T	G	CACGCTTAGCACGAGTAAGTGAACTTTGGCTTAGCGAGCCAGGCATCCTAAGCACCAGAA[T/G]AGACAATTGACTCGTTGGACGAGCTGATAACGCACTGAGTGCATGCTGGCAGATTCCCTT	N	C	0.598	0.46046	Unknown
BARC_1.01_Gm01_46870986_A_G	Gm01	46870986	A	G	GGTTTTCAAGCTGTATGCTGTGCACTCCGGGCACGAGCCGGGGCCGTTGGACGGGAATGC[A/G]AGGATTATGCATAGGGTTGTTGGGCATAAGGGGGGTGGGTTTTTGATGGATCAGGAGAAT	Y	B	0.996	0.82668	Y	CDS				0.372	0.372
BARC_1.01_Gm01_46874266_G_A	Gm01	46874266	G	A	TCAGGTTGAGTTGAGAATCAAGGAATTTTGATTTGATTTGATCTGACAACAGTATACCAA[G/A]TTGGGCTCTGGAATATTCTGTAACTTTCAACTGTTAGAACATAACATCATATGCTGTCTA	Y	C	0.858	0.66066	Y		0	0		0.083	0.028
BARC_1.01_Gm01_46885903_G_A	Gm01	46885903	G	A	CTCTAGATATGATTTTGACGATCCAACCAAATAATTTAAAATATCACATGAGTAGAACCT[G/A]CTATCTAAATATTAGCCTGATCCAACGGTGAACGAATCCCTAGTTATAATCTAAAAAACA	Y	C	0.573	0.44121	Y		0	0		0.008	0.003
BARC_1.01_Gm01_46890321_T_C	Gm01	46890321	T	C	AAAATGAGAGCTAAAATCAACAATTTGGAGAGTTTGCTTCTACACCAAAATGAAGACTTT[T/C]GAGAACAAATATTAAACGGGGAAGAAAAAAAGGGGGGGAAAGTAAATAAAGTGTTCATAT	Y	C	0.841	0.64757	Y					0.008	0.008
BARC_1.01_Gm01_46891710_G_A	Gm01	46891710	G	A	TATACATAGTCTTAAGAGACAAGAAGAAAGGAGCCATGATATTTTTCTTGCTAAACCAAC[G/A]AGCACTACCACACCCCCTTGAGTCCATTGTTGCACCATTTTTCACTCACTTAGTGTCGTT	Y	C	0.996	0.76692	Y		0.031	0.042	0.0364583	0.185	0.085
BARC_1.01_Gm01_46896370_C_T	Gm01	46896370	C	T	AATAGGTCTCTGCACCTGAGACACATCCTTTTCCTGTTGCTTATTCTTTTTCCTATATTG[C/T]GGTGGCTTATTCAGTGAGCAAAAGCTCTTACTATTCCCGCGCCAACTTCCACTCTAGCTC	Y	A	0.976	0.976	Y					0.011	0.011
BARC_1.01_Gm01_46897501_A_G	Gm01	46897501	A	G	TAAAGCAAAACAAAAATGTGGGTACCTCGATCGATCACATACATGGCTTCGATTGGTTTC[A/G]GGCTAATCAATGTATAGGAGTCCACCAAATCTTTCCACAGGTACGATCTAGACGACCACA	Y	A	0.8	0.8	N
BARC_1.01_Gm01_46924704_G_T	Gm01	46924704	G	T	AAAGGACAATTCGGTGGAGAGCACAGGAAGGAAGTGGGAATAGGCATGCCGCAGAGTGCA[G/T]GCGCCATGCCACTGGGTCTCTCTCTGCCACCGCCACTGTCTGCAACTGCAACGTGGACGC	Y	C	0.75	0.5775	Y		0.073	0.057	0.0628272	0.068	0.067
BARC_1.01_Gm01_46940585_A_G	Gm01	46940585	A	G	TATGTGTGCAAGCAACTCTCAACATTCACCTCAACCATTGAAGGATGAAGGGGGAAAGGG[A/G]AGTGGAGTTGTGGAGGAGGGTTGGTGGGTGGGTGACCACAATGGTGGATACATCTTGATG	Y	B	0.897	0.74451	Y		0	0		0.408	0.127
BARC_1.01_Gm01_46944389_T_C	Gm01	46944389	T	C	ATGTCATTATGTAATTGTTCGTTGATTGACATGTGTCATTAATTAGATAATGACACCTGA[T/C]CGTTAACGTTTTCTCTTAACAGTCAACATCTAATTTTTGCTCTGAAGACACAAATGGTCA	Y	C	0.646	0.49742	N
BARC_1.01_Gm01_46949456_T_C	Gm01	46949456	T	C	GATACCCATACTTTACATTGCTGTTGTTGCACTAGTACCATGATGTTTCAACAGGTTTTT[T/C]GAAGGGCTTGTTCATTAATTTCTTTTTCGATTCTTTCCTAAAGGGAAGATCATGTCTTTC	Y	D	0.935	0.62645	N
BARC_1.01_Gm01_46985639_A_C	Gm01	46985639	A	C	TGTGTATATTTAATTGACTGACTCCTTTTTTTTATTTTTTTCTATCTTTTCTTACTGTTT[A/C]ATTTTCCATTTTTTTAGTTATTTTTAAGCATAAGATATTTGGTTGCGATATCCAAAAAGA	Y	B	0.596	0.49468	N
BARC_1.01_Gm01_47016260_G_A	Gm01	47016260	G	A	TGTGCCCCACTTTTTCTGTTGTTCGTGTCCTCGGTCCTACAGCTCGTGCCCCAGTTTGGC[G/A]TCCCGTTCGTGTGTGTCCCTGGTGTCGCGCTTGGCCATTGTCAGCCAGGTAAGTGTATTT	Y	C	0.703	0.54131	Y		0	0		0.031	0.01
BARC_1.01_Gm01_47023597_C_A	Gm01	47023597	C	A	AAATAGTTTCAATCAGCGTCAACAAAATAACCTATAGCCAACGTCAACCAAAAAATAATT[C/A]TGACTGATGTTGGCCAAAAAATATCAACGGCAGGCATCGGCAAAAAAAAACCTTACCAAT	Y	A	0.809	0.809	Y		0.203	0.289	0.243386	0.032	0.488
BARC_1.01_Gm01_47028822_G_A	Gm01	47028822	G	A	TTGAGCCCGTCTATTCGCAGGGAAGTGCAGGTATTACAGCCAACCTCATTGGCTCAGGCA[G/A]TTTCGTATGTGCGACTACAGGAAGAAAAGATCCTCGACGCTCACCGGCTTTCGTCATATC	Y	A	0.878	0.878	Y		0.203	0.286	0.242105	0.053	0.479
BARC_1.01_Gm01_47030426_A_G	Gm01	47030426	A	G	CCAAGTTCTGTTGGCGGGTCAATTCTCTCTTAAGCTCTCCAAATGCACATTCGCACAACA[A/G]CAATTAGAATATCTAGGGCATGTGGTCTCTGGTAACAGCGTCGAACCAGTGCCGGAAAAA	Y	C	0.9	0.693	Y		0	0		0.019	0.006
BARC_1.01_Gm01_47032060_A_G	Gm01	47032060	A	G	CTAACATAGAAGCAGTTGATGAGATGCTTAGTCAATGAGAAGCTGTTTTTGAAATGCTGC[A/G]TCGTAAACTGCTCAAGGCTCAGTCGCGTATGAAAACTAGTGCTGATCGTCACCACCGTGA	N	A	0.897	0.897	Unknown
BARC_1.01_Gm01_47043876_C_T	Gm01	47043876	C	T	CCCATTCAAAAATTTGTTGGGTGCACCAACAATGTTACGAGGTGCACCTAGCATGTCCCC[C/T]TTCAGGGATGGAGGCAGACTAAGAAGTCAGGAGGGCCAACTACAAAAACCAAATCCAACA	Y	A	0.976	0.976	Y		0.203	0.289	0.243386	0.031	0.49
BARC_1.01_Gm01_47047648_A_G	Gm01	47047648	A	G	TTGTAGAGGGCACGGATCTAGGTGATCGCATGCAACACGCAATGAGAGCATTGGTCGTTG[A/G]CAAGATCGCCACGACACTAGAACAGGTTGTAGACGGCGTCGGAGGAGACGGGAACGATGA	Y	B	0.949	0.78767	Y		0.083	0.208	0.142105	0.444	0.246
BARC_1.01_Gm01_47053545_G_A	Gm01	47053545	G	A	TGGCAGCAGTGCAAGAAGAAAGCAATGAGTGAACTAACGTAAGATCAATGCTGAAATTGA[G/A]AATTTTTTATAACCAGTTCCAAGAAAAATGAAAAAAGGGCATTGTAAACACAAGTGAGCA	Y	B	0.868	0.72044	Y		0.224	0.287	0.253968	0.166	0.451
BARC_1.01_Gm01_47055080_G_A	Gm01	47055080	G	A	CGAGTTGGGACTTCGTCCACATCAATGGAAGAAGAGGTTGAAAAGGCTAGGGCTTCAACA[G/A]CGGGTTCAATGCGAAATTAGAAATGAGAAATCAGAATTTTTTACGTGAAATCAGAAGTGT	Y	B	0.809	0.67147	Y		0.224	0.289	0.253968	0.092	0.476
BARC_1.01_Gm01_47061794_G_A	Gm01	47061794	G	A	CTGAAGCTATATGTGAACCTCCCACGTTACGAAAGACTGAGGGGTGGACAACTGAAACCA[G/A]GAGGGAGAAGACAGGAACAATGGCACGGGAAGCGCCCAATAAACCTTAACCTCATGCACA	Y	A	0.949	0.949	Y	Intron	0.224	0.286	0.252632	0.268	0.4
BARC_1.01_Gm01_47063727_A_G	Gm01	47063727	A	G	AGGGGTCTAGGGAAGGGGGTAAAAGGGGCAGCTATAAGAAGGTTAATTGTAAAGGAGAAG[A/G]CAGATATGATTTGCATCCAGGAGACCAAGAAGGAGATTATAGAGAAAACAGCATGTCAAG	N	B	0.842	0.69886	Unknown	Intron
BARC_1.01_Gm01_47064939_A_G	Gm01	47064939	A	G	GTTCACAATAGACCCCTCCTAGATGGGGTAGAATTTCAGTCATTAGATCAGTACCACAAT[A/G]ACTTGCTGAGTGGGAGATTTACGGAGGAAGAGATTAGGGAGGCAGTATGGGGCTGTGGGG	Y	C	0.842	0.64834	Y	Intron	0.137	0.074	0.105263	0.426	0.203
BARC_1.01_Gm01_47066676_G_A	Gm01	47066676	G	A	TTGTCATGGAGGAGGCCGTTGTTTGATAATGAGATAACAATGGCTTCAAATTTCCTAACG[G/A]ACATTGGGACGGATACAATTCAGAGAAACAGAAAGGATGAGTGGGTGTGGAAGGAGGATC	Y	B	0.719	0.59677	Y	Intron	0.224	0.286	0.252632	0.193	0.444
BARC_1.01_Gm01_47074503_C_T	Gm01	47074503	C	T	ATTCAATTATGTCTCCCCGCTTGCCATACATGTCAAGCAGAGCCCCTGAAACAATTGGAT[C/T]AGTGCTTAAACCAAGTTTGCAAGTGAGAATGGCAACGTTGCCCATGGTTCAATGATATAT	Y	D	0.9	0.603	Y		0.083	0.21	0.143617	0.253	0.182
BARC_1.01_Gm01_47076288_A_C	Gm01	47076288	A	C	AGAAGGAAGAATGGAATACTGGGTGAATTCTGGCGTTATCCGACAACTGCAAGCGATAGG[A/C]AACCTTGCCAATACACTCGAAAATTTCAAATGGGCCAAAGAAGCGCTTGGTAAGCTTGTT	Y	B	0.996	0.82668	Y		0.083	0.208	0.142105	0.295	0.197
BARC_1.01_Gm01_47077731_A_G	Gm01	47077731	A	G	GCATGTAACTCTTGTATATAAGTTGAGGCACATTGCATGCAAGGGCTGAGCTTCTTATTG[A/G]AAAAAGCGATAGGATGGCCCTTTAGCATCAAAACGGCGCCCATGGCACTCCCAGAAAAGC	Y	A	1	1	Y		0.224	0.286	0.252632	0.266	0.42
BARC_1.01_Gm01_47079411_G_A	Gm01	47079411	G	A	TTTTCTTCTTCCCTTCTTCAACAACAACCAAAACCCCGCTTCCTTCTTGTCGTCAGGGAT[G/A]TCATGGAGGTGCTCCTTTCCTCTTCCTCGCCTAAGTTATAGCGAAATGCAAACCCCCGCC	N	A	0.996	0.996	Unknown
BARC_1.01_Gm01_47089075_A_C	Gm01	47089075	A	C	ACTATTAAGTTTTATTCAGTTGCATACCGTGGAATACCACACCACTAAATGTGTGAAATA[A/C]AATATAATATTTATAGTACATAAGCATTTGTACTATTATGCATGAATATCCATACAAAAT	Y	D	0.965	0.64655	Y		0.083	0.205	0.142105	0.418	0.236
BARC_1.01_Gm01_47100215_A_G	Gm01	47100215	A	G	GTGGATACGATACTCAGTCTTACCGTTTAAATACTACTTGTGCAAATCAGTACACTTGCC[A/G]ATAGGTGAACAGTAAGCAAACTAACATGTCTCGAAAAGGTGCAAAAAAGAGCTCAAAGCT	N	A	0.965	0.965	Unknown
BARC_1.01_Gm01_47102091_G_A	Gm01	47102091	G	A	ATGATCACAAAACTTATACACATCACGCCTCATATCAGGCCAAAAGAAATGCTTTTATAG[G/A]ATTTCTAGGGTCTTTTGAACCCCAAAGTGACCCATCCAACCCCCCCTCATGTGATTCACT	Y	B	0.421	0.34943	Y		0.364	0.268	0.428571	0.442	0.439
BARC_1.01_Gm01_47111541_T_G	Gm01	47111541	T	G	CCACAAAAAATTTCCAGTTCCTACTACTCGCAGCTTCAATAGTTATGATAGCATCAAGCA[T/G]CTCTACTTCGAGAGCATTAGAATTTCCCAAAAAATTAGCAAAGCTCCCAAGAGCAGCTCC	Y	B	1	0.83	Y		0.083	0.207	0.142857	0.346	0.21
BARC_1.01_Gm01_47114225_C_T	Gm01	47114225	C	T	GAAAAGATTACACCGGATACACAACCTTCACAACATTATAAGTCACTACTCTAGGTAAAA[C/T]CAACTCAAGAAACTACGTACCCGTAGTTTACAAGTAAAATCAATCATCTTTCACACATTG	Y	C	0.935	0.71995	Y		0.229	0.29	0.259259	0.391	0.381
BARC_1.01_Gm01_47115450_G_T	Gm01	47115450	G	T	ACATCTCCACCGTTGGGATTTTTAAATTACCGTCTGTGGATGGAGAAATACTCATGACAT[G/T]CAGATAGTGGTATGAAGGCTTTAATCCCTTTTGCTTCTCTCTGACGCTTGGAAACCCTAA	Y	C	0.609	0.46893	Y		0.234	0.309	0.268817	0.422	0.375
BARC_1.01_Gm01_47116969_C_T	Gm01	47116969	C	T	ATGAGGCGTGTTGTGTTGAGGTGTGGTGTCACGTGACAGGTGGTGGAATGACATTGGCTG[C/T]GTTTAAGTAAGTTGTATTTCATTTATATGATATGTATATCTATGCTGTCATGTTTCTCTC	N	A	0.569	0.569	Unknown
BARC_1.01_Gm01_47128139_T_C	Gm01	47128139	T	C	TACACTTGGACATCTTGGATTGCTCATGGCTAGCACCTAATTTATTTTCTTCCCCCAAGA[T/C]TGCCACTGCTACCTTAGTATATTTCTTATAATTAGCGCGAGACTAGAGATGACATAATAA	Y	C	0.791	0.60907	Y		0.229	0.282	0.253968	0.346	0.392
BARC_1.01_Gm01_47129159_A_C	Gm01	47129159	A	C	GTGAGACATTGTCCCCCATATAAGAATTTGAACCTTTGGTACGTTGAACATACATCTTCC[A/C]TATGGTGGAAAACATTTATATAGGACAATCTTGGCCAGCTTCTTTCATTTCACTAATAGC	Y	A	1	1	Y		0.224	0.287	0.253968	0.376	0.384
BARC_1.01_Gm01_47130768_A_G	Gm01	47130768	A	G	GTTATTATAGCCTCTGCATTGTAGGGGCATAATATCAAGTACAGAACTAGTTTATAAAAA[A/G]CATGATATTTCTCTCATAGTTACTACCGTTACCATCCCCGTTGAATACTCCATGATTTCT	Y	A	0.935	0.935	Y	CDS	0.229	0.295	0.26178	0.36	0.386
BARC_1.01_Gm01_47132168_T_G	Gm01	47132168	T	G	TTCTTTAACATCATGGACTAATTATGTATTTGTGCTACAATATAATATATCTCTTTTTTC[T/G]TTTTTTTTAAATTTTTTTTAAAATATTATTGTTAAATTCTTTTATTTATTTATTTTAGTT	Y	B	0.643	0.53369	N	Intron
BARC_1.01_Gm01_47137215_A_G	Gm01	47137215	A	G	ACTCTTTTTCACAATTTCCAACTTTTTATTTCTTCTATCTATCTATTGTTATAACATTGC[A/G]CACTCATCACTTCTGTCTTGTTTGTGTTTGTGGGTTGTGGCATCATGCAGGTCGAGCTTG	Y	C	1	0.77	Y	Intron	0	0		0.161	0.054
BARC_1.01_Gm01_47156331_A_G	Gm01	47156331	A	G	TTCAAAAACTGCATCATTTCGAGCCTTCCATAGTTGCCAAGAGGCGCAAGCAAAGAGGAT[A/G]CCCGACGGGAGTTGAAACTGTGAATGAAGCCAATGTTGAACATCTACTGAATGGAAGTCA	Y	C	1	0.77	Y		0	0		0.029	0.01
BARC_1.01_Gm01_47165807_C_T	Gm01	47165807	C	T	ACATATTTTTTATACACATAATTATCCGACAATCATATTATTATACTACCATATTAATTC[C/T]CTCTCCCCTCTCTTTCGGAGCTAGAATATTTTTTTTTCATTGAAACTAGAGCAGCTAGAA	Y	B	0.927	0.76941	Y		0.226	0.312	0.26738	0.042	0.499
BARC_1.01_Gm01_47188458_G_T	Gm01	47188458	G	T	CAAGTAATAATTCTTGTGTTTTATAACATGTCCATGTGGGTTTAGTTATATATATATATA[G/T]TATGGCAAGAGTGAGCACTACTAGAAAAATTGGATTTTAAGTCGGTTCTTATGGCCATGT	N	C	0.421	0.32417	Unknown
BARC_1.01_Gm01_47203439_A_G	Gm01	47203439	A	G	AAAGAACTACTGGAACCCAGTAAATACTTCTGTAGTATTCCGAGGGGCCAAGAAGGCTCG[A/G]GGGCAAGCCACATAGGAGGTCCCTCCAGCACCACAACCAATTCCTATGTCTGCATCCACT	Y	B	0.878	0.72874	Y		0.229	0.271	0.244681	0.01	0.174
BARC_1.01_Gm01_47205668_C_T	Gm01	47205668	C	T	CTCCTCGCTTAGCAAGTCAGAATCGCTCAACCCAAGCTAGCCGCTTGGCGCAAGAAGTCA[C/T]ATTGGAAAACAGCTGTCACGAGCAAGTGCGCTAAGCGCGTATCCTACACTTAGCATGTGG	Y	B	0.638	0.52954	Y		0	0		0.083	0.027
BARC_1.01_Gm01_47212428_G_A	Gm01	47212428	G	A	TTAATGGAATTTGAAATAAAGTGGTTAATTATGTTTAAAAAATGAAACAGGTTGAGATAT[G/A]TAGATATGTATAATTATAAACAGAATTATATTTGTCTCTAATCAGAGACGGACTATCACA	N	A	0.643	0.643	Unknown
BARC_1.01_Gm01_47231065_C_T	Gm01	47231065	C	T	TTCTTTGTGTCAAAGAAAGTATTGCTTGGACTTGATTTCATATGCAGGCTTTTTAAACTG[C/T]AAGCCATGTTCCACACCAATGGACACCTCTTTTCGCCTCCACCATGATTCCAGTGAAGCT	Y	A	0.781	0.781	Y		0.153	0.042	0.0947368	0.091	0.096
BARC_1.01_Gm01_47238963_A_G	Gm01	47238963	A	G	CCCTAGTAGCATGGACGAGTAGTGCGAACAAGCCAACGGTTACATCCAGATGGAAGAGAT[A/G]TCCAGGTACAAGAATGAGGTCCAACAACCCGGACAAAAGTGCAACAAGCGAGAAGGAAAC	Y	C	0.781	0.60137	Y		0.168	0.042	0.100529	0.293	0.309
BARC_1.01_Gm01_47240397_T_G	Gm01	47240397	T	G	TTCCTACTCCTTTTATACGCCTAAGGTAGCTTAAAATTCACGCAACCTCGCGCTAAGCGT[T/G]CCCTTCTGGGCTTAGCAAGTATGGTAGTGATCATGCATTGAGTGTGGCGACATTTGGGCT	Y	C	0.627	0.48279	Y		0.168	0.042	0.100529	0.031	0.395
BARC_1.01_Gm01_47241578_A_G	Gm01	47241578	A	G	GTTGAGGTCTACGTCGATTACATGGTGGTTAAATCCCACAGCCTAGCCCAACACGTGGCA[A/G]ACCTGGAAGAGGTATTCGGAGAAATCCAAAAATATGACATGCGCCTCAACCTAGAAAAAT	N	C	0.704	0.54208	Unknown
BARC_1.01_Gm01_47243497_A_G	Gm01	47243497	A	G	TGAAGACTTCCTGATGAGGCTGGGCGTCAAACACCTCACCACCTCTGTCAAGCATCCCCA[A/G]ACCAACGGTCAAGCAAAGGCAGCTAACAGAGCCATCCTTAGGGGCCTACCGTTTCTAACA	Y	C	0.75	0.5775	Y		0.163	0.042	0.0957447	0.341	0.296
BARC_1.01_Gm01_47246291_A_G	Gm01	47246291	A	G	CCACGATAGGACCAGCTAAAGCGGTTGGCACATCAACTTCAGTAGCCAAAGCAATCTCCT[A/G]AACAAGCACTGCAGAAGGAGGTGAAGGAGCAGGAACAACAACAACAATAGGAGCAAGACC	Y	B	0.996	0.82668	Y		0.168	0.042	0.100529	0.031	0.395
BARC_1.01_Gm01_47247587_T_C	Gm01	47247587	T	C	ACCATAGTGACCAGGATAAGTTCCCCGGCCGGGGAAGCAGTGAAAGGCTACACCCTCATG[T/C]GCAGGCGAGAAATGCATCCACCAGTACAACGTGAAACCCTCAACCTCTCCAAGGGAGTGC	Y	B	0.787	0.65321	Y		0.073	0.229	0.147368	0	0.102
BARC_1.01_Gm01_47248496_G_A	Gm01	47248496	G	A	AATCTCCCTCGACACAAGACAATCTCCTTCGACTATTTCTTTCGCCCGCAAGCTGGCTCA[G/A]AGCATGTGGCTTATGTACTTTCCAGGGTCCACAAAGTACATGTGGCAAGCTACGTGGCAC	Y	C	0.976	0.75152	Y		0.153	0.042	0.0947368	0.011	0.07
BARC_1.01_Gm01_47252192_C_T	Gm01	47252192	C	T	TTCTGACGGTGGAACCAGGCAACAACCCAGAACCGGGTCCGTCCGGTTGGGCCGTTCTGG[C/T]TGGAGTGAGACAAAAGTGAAAGGACGGATATACCCCCGGATTCATATTTGTTTGTTCTGA	N	B	1	0.83	Unknown
BARC_1.01_Gm01_47254130_T_C	Gm01	47254130	T	C	ACTGATTTAGGCACCCTGAAAAAAGACAAAAAGTAAATTGGAATCGATGTTAGCACTGAT[T/C]GTATGAGTGTCACTCTCCCCCCAAAAGATATGTGTCTCTGTTTCCACCTCGCTAACTTTC	Y	D	0.421	0.28207	N	Intron
BARC_1.01_Gm01_47260336_T_C	Gm01	47260336	T	C	CCTTGGAAATTCACATTGCCCTCAAGGTGATATGCTTAACCATGACTACCAAGGTAATAC[T/C]AGGGTTCCAAGGTCTGTGGCGGCAAAACTCACTCAGCTCAGCGCTTGCCCATAGTGCCAA	Y	C	0.668	0.51436	Y		0.074	0.245	0.15873	0.01	0.109
BARC_1.01_Gm01_47286966_G_T	Gm01	47286966	G	T	AGTCAAGACTCCAGAGCATTGCGGAAGAGTTAAGGAGTTAATGCTATTATCAATTCTCAA[G/T]GAACTAGCTTAATATTGCATCGAGAAGACATCACTCAGGGATTTCATAAAAATAAGAGTG	Y	A	0.988	0.988	Y		0.168	0.042	0.100529	0.475	0.247
BARC_1.01_Gm01_47288342_T_C	Gm01	47288342	T	C	TAAAAATGCAACCAGATGAGACTTCTGGTTTAGGAATACAGAAGTTTTTGGGTCAGTTGC[T/C]TTGAGAAATTTTGGATGTGATTGGAACCAAAGCTTCACTTGTTCTGGATCAGCTTTGGAT	Y	D	0.719	0.48173	Y		0.074	0.232	0.152632	0.032	0.113
BARC_1.01_Gm01_47294612_T_G	Gm01	47294612	T	G	TTACTATTCTTTTAAACAACAGAAAATTATAAATTTATAATTATTAATAAAAAAATAATA[T/G]TTTTTTAAGGAAAATTAATACTAGTTAATAGTAGTATAGTTTTTTTATAGGAGTTAATAA	Y	C	0.425	0.32725	Y		0.016	0	0.00540541	0	0.009
BARC_1.01_Gm01_47296536_T_C	Gm01	47296536	T	C	TGATTCCCCAAAGCCTGAGGAGAACTTCTTTAGTGACCTTTCAAAGGCCAAAGAAGACAA[T/C]GCTTCTTTGAATTTAAACGGGAGAGGGTTTCTGGTTGCAAACAGTAATAAACCTGTTGAA	Y	C	0.988	0.76076	Y	CDS	0.245	0.271	0.251337	0.031	0.499
BARC_1.01_Gm01_47298676_G_T	Gm01	47298676	G	T	AAGACATTAAATATTATACTATTAGGAGTAGAAAGAAAATTTAGGTAAAAGTTTTTAAAT[G/T]TCATATGGCATGTTGGGGTACTAAAAATGAGTTAAGTAACTTTACTATGATTGCACAAGA	Y	C	0.681	0.52437	Y		0.016	0	0.0052356	0.465	0.181
BARC_1.01_Gm01_47310473_G_T	Gm01	47310473	G	T	AAGAAGGTAAAAAGTATGATTGAGTGACTAACATTAGAGCAAGTTCTCCAAAGCATGAAA[G/T]TTTTTCAGCTGTGTAGCGCTGCAAAACCCTAGGTACCTCCCCATCTTTTTCTTCCTGCCA	Y	D	0.9	0.603	Y	CDS	0.13	0.358	0.384211	0.492	0.42
BARC_1.01_Gm01_47322119_T_C	Gm01	47322119	T	C	GACCTTGGCGAGAATGATGTCGTCAGGCTTAAGCTTAGTAGAGGTGGCGGCGTACTCCGA[T/C]GCCTTGAACAACGACGTCCTTGTCATGCACCTCAAGCTCCTTGAAAGCTTTCGACAAGTG	Y	B	0.949	0.78767	Y					0.028	0.028
BARC_1.01_Gm01_47324314_G_A	Gm01	47324314	G	A	CGAGCTTGTGGCGCGCTGGGCACGGGCATCTGAGACAGATCTTCTTCTAGGGTTTCCCAC[G/A]CGCTAAGCGGGCTGAGTGCCTCGCTTAGCAGATGTCACTTGCTAAGCACATATGTCTCGC	Y	B	0.441	0.36603	Y		0	0		0.031	0.01
BARC_1.01_Gm01_47327886_T_C	Gm01	47327886	T	C	GGGCTTCCTCTTGCGCCTTCTTTGCGCCAAGCTTGAGTTTTCCCGATTAGCGAGGGTACG[T/C]GCTAAGCCTGGATTGTGCGCTAAGCGAGCGGTCCAATTCTTCCAATTTTTCTTCGAGACT	Y	B	0.824	0.68392	Y		0.073	0.226	0.147368	0.307	0.201
BARC_1.01_Gm01_47329079_T_C	Gm01	47329079	T	C	TTTGTTTGGAGTTAAAGAGCCTATGCATGGTATTGGACAAATGAAGGGAAATGCTAGGTG[T/C]ACCTAGCAATATTGCTGGTGCACCCAACAATTTTTATGAATGGGTCATTTTGCCCTTTAA	Y	D	1	0.67	Y		0.073	0.231	0.148936	0.302	0.201
BARC_1.01_Gm01_47339438_T_C	Gm01	47339438	T	C	CATATTGCTTAACTGGAAAATTTGTGCTGTGTAATCCCTCGGGGCTTATGCAAGAGATTT[T/C]CCCTTTCAATTATAAGTCCCACTTCTTTAATTCCTATTTTGCTATATGGTCCTTTCATCA	Y	B	1	0.83	Y		0.089	0.229	0.153439	0.387	0.314
BARC_1.01_Gm01_47342247_A_G	Gm01	47342247	A	G	CATATAGCTTACTGGCCAACTTGTGGCCTGTTATGAAAAAAAGAAAAATATTATAAAAAA[A/G]TGTATGTAAAGAGAAACATTGACAAGGGATTGTAGTGGAATTCACAACTTGTTAGTCTCT	Y	D	0.935	0.62645	Y		0.089	0.226	0.153439	0.387	0.312
BARC_1.01_Gm01_47345754_A_G	Gm01	47345754	A	G	GTGTGGGAGCTGGTATCTCAACCAAAATTGAAGAAGCCCATTGATGTGACTACAAAGAAA[A/G]CTGGGATTGTGGCTAGAGGATTTTTACAGAAGGCAAGGTGGTCAAGTATAAAGCTAGACT	Y	B	0.466	0.38678	Y		0.073	0.234	0.148936	0.031	0.114
BARC_1.01_Gm01_47347749_C_T	Gm01	47347749	C	T	TGCATTTCATGATTCTGCATTTCCCAAAAAGAAGTTAGGTAAGAGGTACAATGTCGAGGA[C/T]GATTTTCACGTGATAACGGCACACACCGATAGCCCCCCTGCCTCAAACTGAAGCCCAAAC	Y	C	0.9	0.693	Y		0	0		0.095	0.031
BARC_1.01_Gm01_47349039_C_T	Gm01	47349039	C	T	AAGAACAATGATGGAAGAACTGCTCTTCACATGGCCATCATTAGCAACATTCAGTTGCCC[C/T]ATCAATAAAGGTGAATACATGTGATGTTGATGGCATGACCCCACTAGATTACCTTAGGCA	Y	B	0.842	0.69886	Y		0.089	0.232	0.154255	0.382	0.32
BARC_1.01_Gm01_47351609_G_A	Gm01	47351609	G	A	ATGACTCGCACTAAATAGACACGTTGTTGGACACTCCCCCCCCCCCAATGAAGGCCCTTC[G/A]CATGAAGGGAAAGATGTGAACGAGAGAATTCGTAGAGTGACTGTGTTGACACGCGCTGTG	Y	C	1	0.77	Y		0	0		0.039	0.013
BARC_1.01_Gm01_47352581_C_T	Gm01	47352581	C	T	TCTAGCAAGTGTTGGCTACTCAAAGCTAAAGGATTATGTGATAGAGGACTCGATAACCAC[C/T]TGGAAGCCATTGAGAGGTATCGGGCATGCCCTTCTGGTCAGGGGGAAACTAGATAACCTA	Y	C	0.738	0.56826	Y		0.089	0.232	0.154255	0.371	0.32
BARC_1.01_Gm01_47361944_T_C	Gm01	47361944	T	C	GTGGAAGGACAGTGGTTCGAGCCTTGGAGGTCGACGGTGCTAGTGGAACGATACGACGAT[T/C]TGGGTTTTTAAATAGTCCTCGTGTCTATTTAAAAACCAAAGGTCACCACGACACTGCCAG	Y	B	0.733	0.60839	N
BARC_1.01_Gm01_47369007_T_G	Gm01	47369007	T	G	GCTGGGCGCACCAAATAACACTCAAATCTTGGTCGGTTCCTTAGAACAATGTGTAGCTAG[T/G]GTGTGTATATATATATATATATATATATATATATATATATATATATATATATATATATAT	Y	D	1	0.67	N
BARC_1.01_Gm01_47371491_C_T	Gm01	47371491	C	T	CACATCATCACGTATTGTCACGACACCTCGTCAATGACAAGACGTGATGAAATGATACTT[C/T]GTTTGTCACATCATCACTTAATAGAAGACGACTAATGACAGATAATAAAATAAAACTGAA	Y	B	1	0.83	N
BARC_1.01_Gm01_47394202_G_T	Gm01	47394202	G	T	GGCACTGTGATTTTCTTGCGTGTTATTCTCAGCATTTGATTCTGTGTATGACTTGTCATA[G/T]CGATAAAAACATTGCACTGCAGTATGTCCAAACTTGTTGCATACCTGACATGTTGGTTTA	Y	C	0.9	0.693	Y	CDS	0.042	0.335	0.18617	0.008	0.129
BARC_1.01_Gm01_47398196_C_T	Gm01	47398196	C	T	TTCACTTACTCTCGCTTAGCGAGACATGCTCGCTGAGCGTGCCTTCGTGTGCTGAGAAGT[C/T]CAAAGGCCTTTAAAACACTGAGTTGGTGGGAAATGAAAAGACACCAAGCTGATACTACAT	Y	C	0.436	0.33572	N
BARC_1.01_Gm01_47412210_A_G	Gm01	47412210	A	G	ACAGTCAAAGTCCTTGTGAAATTGACACTCGATCTTACCATTTTGAAACACTACTTGAAC[A/G]GATTCGTACACTTGTCAAGGAGTTAACACCAACATGGCTTGTAATTTGGGAGGTGAGTGT	N	A	0.694	0.694	Unknown
BARC_1.01_Gm01_47491894_A_G	Gm01	47491894	A	G	AGTCTTACTTTTGTCTTTTTTTTCTGATGGCCTCTAAGAAGCGCAGAGCTTGTACCAGTC[A/G]GCCACAAAGGGAGGAACCCACATGGGACTCCACCAAATTTGTCTCTGAGGTCGCTTAGCG	Y	B	1	0.83	Y		0.063	0.219	0.136842	0.039	0.109
BARC_1.01_Gm01_47499097_C_T	Gm01	47499097	C	T	TGCTAAGCCCAAATCCTTCTCGGGTTTTCTAATTTTTGAATTAGGCTGAGCGAGTCTATC[C/T]GCTAAGCGCGTGAATTTGAATTCTGAAAACTCAAACGTCATTGAGTGCTCGCTTAGCAAG	Y	B	0.431	0.35773	Y					0.008	0.008
BARC_1.01_Gm01_47500464_C_T	Gm01	47500464	C	T	ACACACCAGCTCCTTCTTCTTCTGCTCCCCCTACTCCTACTCCTTCCTCCTCTACTCCAG[C/T]TCCCTCTACTTTAGCTCCACCATTAGCACCTCCACTCAGAATTCAGATCTCACAATGCCG	Y	C	1	0.77	Y		0.232	0.042	0.132275	0.487	0.268
BARC_1.01_Gm01_47505074_T_C	Gm01	47505074	T	C	CCCCCGCTTTGCGCCAAAAGTCACATGGGAAGTCCAGTTGTCACGTGCATGTGCACTTAG[T/C]GCATGGTGCACGCTTAGCACGTGATCAGTTATCCAGCTGGACTTTTTGAGCCGCACAACC	Y	C	0.822	0.63294	Y		0.229	0.042	0.132275	0.06	0.407
BARC_1.01_Gm01_47540675_C_T	Gm01	47540675	C	T	CAACCCTTCCATTGGAAATAAAACCTGTTGGCAGCAATTCCTTAGTGCAATGGTTAATAG[C/T]GCACAGAGCCTTGTGATCAAGGTGGTTCCTGAGTCACCATCTTCATCAAGACTCTTAGAC	Y	C	0.976	0.75152	Y		0.193	0.052	0.120419	0.318	0.188
BARC_1.01_Gm01_47544830_C_T	Gm01	47544830	C	T	ATGATTGAACTTCGTAATTTTCTACTTAGACTCTAGAAGAGGCAATTGCCTTGAACAATT[C/T]TGTACCTCAAGGATTAAGTAGATCAATCTTTACCCAAAGGCTTGGAACTATATTCAAGTG	Y	A	0.791	0.791	Y		0.195	0.052	0.121053	0.324	0.191
BARC_1.01_Gm01_47592719_T_C	Gm01	47592719	T	C	AGCCATCTGAAAAAAAAACAGAACCACAAAAACAGACTGCAGTCAGTATACATAGGGGTG[T/C]AAAAAGCAGAAAGAGAGGGGGTGCAGTTATGGAAAATGGGGGTGCAGAAAGTAGAAAAAG	Y	B	0.988	0.82004	Y		0.14	0	0.0357143	0	0.083
BARC_1.01_Gm01_47601703_T_C	Gm01	47601703	T	C	TGAAGTATGTGTCTGCACGAACGAGCTAAAACTTAAAAATCTGAATCCCTTACAATCATA[T/C]GCCGAAAGTGAAGCGACTTCAAGCAATCGAAGTATTGAGGGATCTCTCTAACCCATGATG	Y	C	0.812	0.62524	Y		0.172	0.021	0.0947368	0.279	0.309
BARC_1.01_Gm01_47631685_C_T	Gm01	47631685	C	T	GCGAAATAGCTCATGATATATTGCAAACGACAATGGCGAAATACCCGCCACGTGTCGCTC[C/T]CATGCACGTTTCGCTAGCATGCATGGCGAAATGGGTTTAAAACAGACCCCCCTTGAAATT	Y	B	0.765	0.63495	Y		0.01	0	0.005	0	0.008
BARC_1.01_Gm01_47645161_G_A	Gm01	47645161	G	A	GCCGTTATTGCAACAACATATGGCGCGTGTTTTCGAAGGTTGACGGAGTAACGACGTTAG[G/A]AAAAAGGCTGTGGCCGTTAGACTTCACGGCAGAATCTACGAGGAAGTTTCAACCCTGTTG	Y	C	0.839	0.64603	Y		0	0		0.286	0.23
BARC_1.01_Gm01_47672271_C_T	Gm01	47672271	C	T	CGAAGGGTGGCGCGCCTCCCCAGCGCCACCAGTGCATGGCCCAACGGCACGAGGCCATCA[C/T]GGGGACGACAGCAGCAGCGCGACGGTTGTGCGCGAGGCTTCATTGAAAAATGGAAAAAGA	Y	C	0.787	0.60599	Y		0.126	0.01	0.0634921	0.315	0.281
BARC_1.01_Gm01_47690384_A_G	Gm01	47690384	A	G	GACAAACCGATGCAGTGTGGCCATACTTAAAACACACCTGACACTGAAATTTTGCGAAGC[A/G]ACCACTACCATGGCCTTAGCCGCCACCGTGCTGGCCACTACTATGGTTGAAACCGCCACC	N	D	0.834	0.55878	Unknown	Intron
BARC_1.01_Gm01_47696638_T_G	Gm01	47696638	T	G	CCTTCTCCCCATTCGCAAGAGCCTCCAGTTGATGTCTCATCCATCTCGTAAGTAGTAATA[T/G]TTATAATAAAAATAACATCTTTTTCGCTCGATTTTGTGTTCTGCAAGTGAAAGTTTGAGT	Y	C	0.9	0.693	Y		0.12	0.01	0.0582011	0.361	0.254
BARC_1.01_Gm01_47714984_G_A	Gm01	47714984	G	A	GGGAATAGGCTAGACCGGCCTACAGGAGCCTACGACCTGACCTATATAAAGTCTGGCTTG[G/A]CCTATTTAATTAAAAGGCTAGGCTCAGACTTTTTTAAAAGCCTATTAAATTAAATAGGTC	Y	C	0.414	0.31878	N
BARC_1.01_Gm01_47718680_T_G	Gm01	47718680	T	G	AGCCAAATTTTTGCCATGCGAAAAACGACAACGTAGCAAAGCACGGTTTTTTTTTTTTTT[T/G]TGTGCTGGTGGGGTGCGGGTAGTAAGTAGTAGCTTCGAAAGCGAAATAAAAACATGTGCT	Y	B	0.996	0.82668	Y		0.326	0.305	0.313514	0.366	0.426
BARC_1.01_Gm01_47734651_C_A	Gm01	47734651	C	A	CTTTCCACCTCACATTCATCCTTTTCTTAATTCAATTTTTCATACTTACCCTTTCCTTTC[C/A]TTTTTATTTTAATTTTAAAATCACAAAAAAAAAAAAGACTGTGCAACTTGAGATTTCCTA	Y	B	0.772	0.64076	Y		0.359	0.316	0.335135	0.384	0.436
BARC_1.01_Gm01_47762733_C_T	Gm01	47762733	C	T	TCACTTTTAAATAAGACACAAAAATATCAATCTTGTCTCGTCCATTATGGGTTGGCGGGT[C/T]GGGTGGATTGACTCACCAAATTTTTATAATGAAAAATTCAAAAATAAAATTTTAAAAAAT	Y	D	1	0.67	N
BARC_1.01_Gm01_47788206_G_A	Gm01	47788206	G	A	TCCACCTCGAATGCCGTCGCATCGAAGGTCTTGTTGTTGTTGTTCTTTTGTTTGCCGACG[G/A]CGGCTGCCACCTTGAACCAACTGCTGTGGGGATTTGTGGAGAGGGAACGAAGGGTGCAAA	N	C	0.651	0.50127	Unknown
BARC_1.01_Gm01_47801778_C_A	Gm01	47801778	C	A	TGTATAAGCCAGAAAACCCCCTCCCTTCCATTTCCATGTGCCTTCCCTCACTCCTCAGGT[C/A]AACACTTGAAGCTGCTAGCTTGATACTGTTCTCAACTCAAGTTTTGTTGAGCCTTTCAGG	Y	B	0.889	0.73787	Y	5UTR	0.128	0.176	0.149733	0.031	0.112
BARC_1.01_Gm01_47807975_G_A	Gm01	47807975	G	A	TATGGGAGTGTACTTAGACAAAAGTGGATTGGATATAACAAAGGCCCCATTTGGAAAAGA[G/A]AGAAATGTCCCAATCAAAATATTCTTACATTTCATGAAGGAGAATTGCTATTGGCACACC	Y	B	0.965	0.80095	Y		0.207	0.219	0.208556	0.052	0.462
BARC_1.01_Gm01_47810128_A_G	Gm01	47810128	A	G	CATACCCTCCCCAATCTCCAAATACTTGCAATTGGTGCCAATGAATATCAGGTCAATCCT[A/G]CCTTCCATCACAAATGCATCTACCTTTTCAAAATTAGATATCGGTCGTAACCATTTCACC	Y	B	1	0.83	Y		0.213	0.219	0.209677	0.24	0.402
BARC_1.01_Gm01_47811897_T_C	Gm01	47811897	T	C	TCGGAGGCAATCAGGTATCAGGAGAAATTCTTGCAGCGATAGGAAACCTAATTAGCTTAA[T/C]TCTCTTGACAATGCAAAATAACCACATTGATGGGATTAGCCCAACAGCTTTTGTGAAGTT	Y	B	0.988	0.82004	Y		0.216	0.214	0.202186	0.488	0.321
BARC_1.01_Gm01_47816851_T_C	Gm01	47816851	T	C	TACATCTATAGCTTGCCCACTAGCACCTCCAAGAGGTTGATGAACCATAATTCGTGTATT[T/C]GGCATAGCAAAGCGCTTGCCTTTGGTCCCACCACCAAGTATAACAGAAGCTGTTGATGCT	Y	B	0.9	0.747	Y	CDS	0.207	0.193	0.193548	0.419	0.277
BARC_1.01_Gm01_47842143_A_G	Gm01	47842143	A	G	CATCTCTTTGGTCGCGAATTTCAGATTGAAATGTGAGATTGAGCGGTTAACTTGGCGCGA[A/G]TATTTAAATCTTGAAGCTAATTTTGAAAATGTTTATTACGATGGTGAGTGGTGACTAAAA	Y	C	0.81	0.6237	Y		0.142	0.221	0.176471	0.031	0.448
BARC_1.01_Gm01_47853391_T_C	Gm01	47853391	T	C	TTGGAGAGGGAAGTTGTGCGTCGTTTCGGCTTCTTCCGGGATCTCCGTCGTCGATGTCGC[T/C]GCGCCGTCGCCGCGGATTTGGTCGGTTCGGCTGCCGGAAGGGTTCGAGCCGGTGACTGTT	Y	C	0.477	0.36729	Y	CDS	0.137	0.176	0.150538	0.103	0.408
BARC_1.01_Gm01_47855385_T_C	Gm01	47855385	T	C	CCTACCAATGGATCAACTCCGAGAGCCAATTTGGATTGAAACGGTGTAAGAGAGTGTTTG[T/C]TTCTGCGTCAAACACCCAAAGAGGCACGTATGTGATGCGAAAATGTGAAGTATTTATTTC	Y	C	1	0.77	Y		0.126	0.179	0.145161	0.172	0.386
BARC_1.01_Gm01_47863447_G_A	Gm01	47863447	G	A	ACAATGGGAGGAGGCACGTGAGAGCGAGGCGGAGGAGCTGGTGGTGTCGGTGTTGGTTGC[G/A]CTGAAGGAGGAAACGATGGCAGCGGCAGTAGTGGTAGTGGCTGCACCGGAGAAGGTGACG	Y	C	0.708	0.54516	N
BARC_1.01_Gm01_47866971_A_C	Gm01	47866971	A	C	CCACAAACCTGAGTCTTAAGGTTTTGAATTAGAGTGTGATGTCAGGTTTTCTTGTGTGAT[A/C]GCTCGTGGTTCACAAGACTAAATCTCCCATCTAACCCTGGAATGAATGTAAATTTATGAT	Y	B	1	0.83	Y		0.112	0.193	0.148936	0.446	0.25
BARC_1.01_Gm01_47872848_G_A	Gm01	47872848	G	A	GAACAATTGTATGGGTGTGCGTCGTCGTGTGTCGTTGTGTGTTGTCGTGTGTTGTTGTGC[G/A]TCACTATGGTTGGGAGATTTGCTCGCGTAATAAGGCCGTGGAAGTGTGGGAGATGAAGAA	Y	C	0.799	0.61523	Y		0.111	0.165	0.13369	0	0.093
BARC_1.01_Gm01_47876895_T_G	Gm01	47876895	T	G	GATGCCGCCGTCGCTGCTGAATCCAGCGTCGGTGATGTCCGGCGAGATGTCTCCGGCGGT[T/G]CCGGCGGCGAGGGAGGAGAGGGGGCCGGCGCAGCCGCAGTGGAGCCAGCAGGAGACGCGG	Y	B	0.685	0.56855	Y	CDS	0.116	0.193	0.148936	0.116	0.399
BARC_1.01_Gm01_47881431_G_T	Gm01	47881431	G	T	TGCATGCGAGTAAGGAAATAATCATTTGTTCAATTTGACCATGCATGTCATTGCTCGTCG[G/T]TGAAGTCACGTATTTACAAAATCTTGAACCTCAAACTCTCTTATTTTCCTAAGGTACATG	Y	C	0.667	0.51359	Y		0.132	0.176	0.149733	0.258	0.356
BARC_1.01_Gm01_47886976_C_T	Gm01	47886976	C	T	CCTAACCCCCAAAAAACCTAAACCCAAGCCCTCCTCTGCCCTCCAATGGAACTGCAAGCC[C/T]GAACTCTCCGGCTCCACCCCCTTGTTATCGTCATCACCTCCAGCAAGGGCGACATGGCCT	Y	B	0.949	0.78767	Y		0.128	0.184	0.150538	0.297	0.346
BARC_1.01_Gm01_47905486_C_T	Gm01	47905486	C	T	TCTGTTAGCTCCAAGCAGATGGAGATAGGTGAATTTGGCTTTTGGCTTTTTGCACCTTTG[C/T]TGCTTTGGTTTATGCCTTGAGATTGATAATTGATATTTTGTTTTCTATAATTCAGTGAGG	Y	C	0.9	0.693	Y	Intron	0.133	0.203	0.164894	0.261	0.363
BARC_1.01_Gm01_47916126_T_C	Gm01	47916126	T	C	ACTTATACACTTCACTTAGAAAATTAAATATCAGAATTATAAGGAACTTTGTGAATGTAA[T/C]TTATTTATTGACATCAACCACTCATTCTTAAGGAAGCCACACTCCTCTCTTTGCCCAACC	N	C	0.711	0.54747	Unknown
BARC_1.01_Gm01_47941285_G_A	Gm01	47941285	G	A	GGCCATGTTTGGATTGATGAGCCCTAAGTAGAGCTTAAGCTGGTTAGCCATGGTGGTTCA[G/A]TGATTCCTTATTTAATATTCATGTAGAGTCGATTCAAATAATGTAAGCGTCCATGTAGAG	Y	C	0.897	0.69069	Y		0	0		0.115	0.038
BARC_1.01_Gm01_47942462_A_C	Gm01	47942462	A	C	TAAGCGAGGGAGAAGCACGCTAAGCGCGAATACATACACCCTCGCTAAGCAAGCAGCATG[A/C]ACTAAGTGTGAATACAGGCACCCGCGCTAAGCGAGCAGAGCATGCTAAGCGCGAGTACGC	Y	B	0.682	0.56606	Y		0.388	0.363	0.372973	0.021	0.26
BARC_1.01_Gm01_47948441_C_T	Gm01	47948441	C	T	GAAATGTCAAATATTTGATGTACCTCTCACGGCATCCCAATTATAGTTTCTGATGCTGAC[C/T]CAGGGGATAAAGCCATGAAGGTATGTACCTGTGCATAAGAGTTTCCCAAGTCATGAGGGA	N	C	1	0.77	Unknown
BARC_1.01_Gm01_47955596_G_A	Gm01	47955596	G	A	ACTATAGAAACTTTTACTCGAGGAGGTGCTCTAGGCCCAATTAATATAGCCTATTCTGGT[G/A]TTTATCAATGGTGGTAATTGGACGTGAACTCACCTTGTTGGTACGCATGTGTTAACACTC	Y	C	0.439	0.33803	Y		0.184	0.266	0.223404	0	0.226
BARC_1.01_Gm01_47959774_A_G	Gm01	47959774	A	G	TAAGACAAGAAAAAGAGGTTGGCGCCTTTAGGTGGGCATTGGATGACAGCTTTTTTTATT[A/G]ATGGGAATGGGAATATAACAACCTATATAGGTAAGGGTAAGGTTTAGTGAAACGGTGATG	Y	C	0.965	0.74305	Y		0.182	0.247	0.21164	0.039	0.158
BARC_1.01_Gm01_47960832_T_C	Gm01	47960832	T	C	TATCCCACTCCTCTCTCTTTGTTGTCGTGATGCACATCATTCCCACTCTGAATTGTCCTT[T/C]CTCCGGTGGCCACTTGCGAGAACACGGAGGTTAGCCACACGAATAGAACGTGATGCCATC	Y	C	1	0.77	Y		0.208	0.258	0.228723	0.331	0.268
BARC_1.01_Gm01_47962968_G_T	Gm01	47962968	G	T	AGCATGGGCTCCCAAGGTGGGAGGGTTCATGTTCTAACTTTTATTTAGTCGGCGCCAAGG[G/T]TCAGGTTTTCACATTTGAACCACTCATTGATTGATGTGATTCGGTGCAGGCGACATTCGG	Y	C	1	0.77	N
BARC_1.01_Gm01_47964568_G_T	Gm01	47964568	G	T	TGAATGTTTGTGGGGTTGGAATGAAGATTCTGTTTTGCCTTTGGCCTTAGAATTTAGGAA[G/T]AGTTATTAGATTGTAATGGAATCAGTGATATTTTTGGTGATTCATTTTGTGCCACTTGTG	N	B	0.9	0.747	Unknown	Intron
BARC_1.01_Gm01_47969266_A_G	Gm01	47969266	A	G	TGGCGATTGCAATTGTCTTTTCTCGATTCTCATATCTCGATATTCGAGTCTTGATAACTT[A/G]TTAGTAATTCTCCGATCGCCGCCGCGAACTGGACTCACCTTCGCCGGAGTCGTGTCGTTT	Y	B	0.834	0.69222	Y	Intron	0.453	0.379	0.414894	0.195	0.344
BARC_1.01_Gm01_47976207_C_A	Gm01	47976207	C	A	CATTGATAAGAAAATCAACTGTTGATATTTGAATACATCTATGATTTGTTATGCATGTGC[C/A]TTTAATACTAACCATTGATTTTCTCATTGATGGCTGAGATTACTTACTTTATTCTCTAAA	Y	C	0.603	0.46431	Y		0.195	0.242	0.215054	0.094	0.452
BARC_1.01_Gm01_47981867_A_G	Gm01	47981867	A	G	CAAGGGAAATAGATTCTTTGGGTGTTCAGAGGTTATAAAAAGGATTTTTATAAAGATACT[A/G]AAAAATCTAAGTGGATTGCTTGAGGATTGAGCGTAGGCACAGGGCGTGGCCGAATCGTAT	Y	C	0.453	0.34881	Y		0.168	0.263	0.212766	0.426	0.34
BARC_1.01_Gm01_47984778_G_A	Gm01	47984778	G	A	TGCACCTAGCATCACCCAACCAGGTGTCGTTTACGTTGGGCCAGTTTCATTTCAGAAAAT[G/A]GCGTTGAGTTTAGTCGTCAGAAATACTGTGTCTGTCAAGTGTACCAAGCGAGAAGAAGGT	Y	B	0.9	0.747	Y		0.168	0.268	0.216931	0.121	0.187
BARC_1.01_Gm01_47993236_A_G	Gm01	47993236	A	G	GATTTTCCCCCTCCTACTACGATGACCCTTAGGGTACCTTGTTCAAGCTCCAACAGACAG[A/G]CTTCGTGAGTGACTATCTCGCGGCCTTTGAACGCTTGGCCAATTGAACCATTGGCATCGC	Y	A	0.976	0.976	Y		0.193	0.253	0.211957	0.191	0.423
BARC_1.01_Gm01_47995969_A_G	Gm01	47995969	A	G	CTTCATCGCCTTCAGCAGAGCTTCGACTGGCCAAACATCAGGGCTGACGTCCGTCATTTT[A/G]TCTCGCACTGCCTCATTTGTCAGCAAACTAAATATGAGACAAAGAAACCTTCAGGCCTCT	Y	A	1	1	Y		0.198	0.242	0.215054	0.085	0.453
BARC_1.01_Gm01_47996923_T_C	Gm01	47996923	T	C	CATGTCTCCCTCTTGAAGGCACATCATGGACCTCCGCCTTCCAATGATAATCCCCTCCCT[T/C]CCTTAGCAGTTGATCACCACCCCGTGGTCAAACCTTTGACAATCCTGGACTGGAAATGGG	Y	B	0.949	0.78767	Y		0.198	0.258	0.223404	0.095	0.455
BARC_1.01_Gm01_48003384_C_A	Gm01	48003384	C	A	CAGTGGTGAGGGCATTTTGTTCGTTGAAGCTGAGGCTCATGTTTCACTCAAGGAGCTAGG[C/A]AATTCCATTCTGCCACCATGCCCCCACATGAAGGAACTCCTCCTTGATGTTCCTGGATCA	Y	B	0.996	0.82668	Y	CDS	0.168	0.266	0.215789	0.335	0.369
BARC_1.01_Gm01_48006111_G_A	Gm01	48006111	G	A	CAAAGTGGGCCTACATGTGCCCAATGGGTACTATGGCAATGCCTTTGCCTTTCCAATGGC[G/A]CTTTCTAAGGCTGGACTTTTGTGCCAAAGCCCATTGGAATATGCATTGGGTTTGATAAAA	Y	B	0.976	0.81008	Y	CDS	0.168	0.25	0.207447	0.061	0.161
BARC_1.01_Gm01_48009054_C_T	Gm01	48009054	C	T	TACCCTGTTGGTTGCAGCTGCTGCTGCATACTAGCTTATACCACACTTTGGTGAATAGTA[C/T]AATGAGAGTATGGACAAATTAGGAGACAGGAACCCTAAGTGCCGGCGATTTTCATGGAAC	Y	C	1	0.77	Y		0	0		0.334	0.222
BARC_1.01_Gm01_48034577_C_T	Gm01	48034577	C	T	ACTTTAACCCAAAACCTTAAGGCTCAGGTTTATGGGTCTTCTCCTCACTTATATGGTGTT[C/T]AACCTTTTCATTTTTACCCGATGTGGGACTTCACCTCACACTTGTAACCCAACAGGACGT	Y	C	0.436	0.33572	N
BARC_1.01_Gm01_48041423_A_G	Gm01	48041423	A	G	GATCCAACGTTCAAAGAGTCTCTGATCATCATTTTAATGAGACAAGTTTGGGTGTATCCA[A/G]GAAAATAAAGGGTTTTGGGGAAGGAAGAAGGAAAAACGAGATTGAGAGGAAGAGGAAGCG	N	A	0.448	0.448	Unknown
BARC_1.01_Gm01_48047350_T_G	Gm01	48047350	T	G	AATAAAGGTACTCCAGCATTAGGCATTCTCCAATCATTCCAGGAATATCACCAGACAAAT[T/G]ATTGCTAGACACATCTAGGCTAGAGATATGTTTTAGCCTGCCCACTTCTTCTGACATACT	N	C	1	0.77	Unknown	CDS
BARC_1.01_Gm01_48052860_G_A	Gm01	48052860	G	A	TGTTTGGACACGATGCTAAGGACACATGGTGTTGGTTGGGCTAGTGAGGGGTCGTGATAG[G/A]AACTCAAAAACAACAGCAGGGGTAAGGGTCAAATAGCAAACCAGGGGGTACAGGAAGAAG	Y	A	0.9	0.9	Y		0.195	0.255	0.222222	0.497	0.32
BARC_1.01_Gm01_48054571_G_A	Gm01	48054571	G	A	GAACCATGTCTTCGTCCTCGACCTCCATGTCCTACCAATTTCAAGCGCCAATATTGTTTT[G/A]GGGGTGCAATGGCTCAAGACTTTGGGGCTAGTCCTCACTGATTATGCTACCCTATGCATG	Y	B	1	0.83	Y		0.22	0.255	0.235955	0.435	0.358
BARC_1.01_Gm01_48056148_T_C	Gm01	48056148	T	C	TACCAAATACAGTATCGCTCCGGCAGCCACAATCAGGCTACGGATGCTTTGTCACGACTG[T/C]CGAAACAGGGACCCTCCCTGTCCATGATTCTGTCAGTGACTTCTCTGACCTTCCTTGAAG	Y	A	0.915	0.915	Y		0.218	0.258	0.234637	0.059	0.465
BARC_1.01_Gm01_48057519_A_G	Gm01	48057519	A	G	CTTAATGATCAACCGCTAGTGTTTCCTCTAGCCATTCTTGACTATCGTCGAGCATCACCG[A/G]AAGCACCCTGGGAAGTCCTCATGCAGTGGCATGGCCTTTCACCAGACGAGACCTCCTGGG	Y	B	0.976	0.81008	Y		0.303	0.25	0.271739	0.253	0.438
BARC_1.01_Gm01_48064827_T_G	Gm01	48064827	T	G	TAAAGCACAACTCGTTGGTTGAAATATGACGTTTGAATTCAGTGCCACATAATTTCTGAA[T/G]GAAGTATTAAATTAGTTAAAACAAACCTTTAGAAATATTAGCTCTTTTTGTACTACTATA	Y	C	0.644	0.49588	N
BARC_1.01_Gm01_48066875_G_A	Gm01	48066875	G	A	GTTGTCATCCAGGTTTTTTTCAATTGATGTCACACCAATGATTTTTTTTTGCCGACGTTG[G/A]CTAGATTTCTTCTACTGACATTGGTCATGACTAACTTTTGAGTAGACATCTGCTAGGGTT	Y	C	0.638	0.49126	Y		0.297	0.25	0.271277	0.218	0.257
BARC_1.01_Gm01_48070564_A_G	Gm01	48070564	A	G	CCGCTCTTTCTCTCTTACTTTCTCTCTCTCCATCCGCGAGGACGAGAGAGAGAGAGAGTT[A/G]AAGAGAGAAATAAGAATCGCGAAGCTAACCCCAACCCACACTATATGTGGTGAACGGGTG	Y	C	0.9	0.693	Y		0.205	0.247	0.223404	0.445	0.301
BARC_1.01_Gm01_48082485_A_C	Gm01	48082485	A	C	AATAGCACAAACACCTCCACAAATAACCATTGATAGAATAGGGTTAAATGTGATAAATGC[A/C]AAACAAAAAAATAAAAACGTTAATATAATGAAACAAACCATCCACGGGCATAATTTGTAA	Y	B	0.748	0.62084	N	Intron
BARC_1.01_Gm01_48086195_T_C	Gm01	48086195	T	C	CTTAAAGTTACTCCTCATCTTGAACATTTATTTTCTTATAATTTAACGGGTAAGATTATT[T/C]ATTTAGACTCAGAGGTGCAGCGTGAGTGATGAATGTAACTCCCATTAGAAGGACGAAACC	Y	B	0.9	0.747	Y	CDS	0.195	0.231	0.209677	0.021	0.15
BARC_1.01_Gm01_48087483_G_A	Gm01	48087483	G	A	AACTTGCATGACAAATACCGGGTCACCTGCTCTTTTCCTTGTAGATTTCCTGGCTTTAAA[G/A]CTTTTTAATCTGGAATGGCTATTCAGTCGTACAAGGAAGTATGCAATTAGTAGTACTTTT	Y	C	0.965	0.74305	Y		0.203	0.255	0.226316	0.104	0.189
BARC_1.01_Gm01_48090225_T_C	Gm01	48090225	T	C	ACATTTCATTTCAATTTTGAAAATGCATAGAAACAGCCTCTTGCATGTAATTGTGCTTCC[T/C]TTGTTCCACTCAGATCTATCTCTTTGAGGAGATGAAGGTGTCTGTAGCAAAAGGAAATGG	Y	B	1	0.83	Y	Intron	0.316	0.258	0.283422	0.245	0.446
BARC_1.01_Gm01_48095582_T_C	Gm01	48095582	T	C	TAAAGAGTGCTACAAATATATCCGGTCATTAACATTCGCCTGTCACCATTAATAAAATAG[T/C]CTACATGACACAGAGAGACGAATTTGTCACTAAAATAATTGTCAACACATGACCATCTCT	Y	B	0.511	0.42413	Y		0.313	0.255	0.280423	0.428	0.386
BARC_1.01_Gm01_48101544_C_A	Gm01	48101544	C	A	GATACCACCTTATTATACAACAACAAAAAGGCCAAACTTAAAAATGAAAAGGAATTCATT[C/A]AGTAAACAACTAGTAGCCACGTTATTAGCACAAACAGACCCTCAGCTAAAATCATCATTT	Y	B	1	0.83	Y		0.316	0.231	0.27027	0.294	0.428
BARC_1.01_Gm01_48109183_A_G	Gm01	48109183	A	G	TGTAGATATACAGGGCAACAAGCATGCAAAAGTATTACATCCAGAGTTTGTCACTTCACT[A/G]AAACATATCAATGAAAAGGTGGTACAAATTAGTCTGACCAATTGCAATTACTAGAATGCT	Y	A	0.9	0.9	Y		0.205	0.231	0.215054	0.073	0.171
BARC_1.01_Gm01_48116555_A_G	Gm01	48116555	A	G	TGTTTAAGGGAGCCCAAGAAAAGAAACATAATTTAGTACCTAATATATCAATTTTCAAAT[A/G]CATAAAATACACAAAAAAGAAAAATAATATATATTTTGATGATCACGATTTTGATACGAA	Y	C	0.714	0.54978	Y		0.1	0.184	0.141304	0	0.097
BARC_1.01_Gm01_48119773_C_T	Gm01	48119773	C	T	ATTGATGAAGTGAGTGTTAAATGCGCCGAGTCAAGAAATGTTACTCCCTCGGTTCTAGAT[C/T]ATATAATATTTTAGAGAAGATTTTTTTTTTCAAAATATGTCATTTTGTAAATTTAGTGTT	Y	B	1	0.83	Y		0.344	0.384	0.363158	0.471	0.4
BARC_1.01_Gm01_48129408_A_G	Gm01	48129408	A	G	CGTGAATGCGATCATAAATAAGTGAATATTGAGGAGTGATATATTGATGAAAAAGATATT[A/G]ATGTATTAAGCATATCAACCGGGGTATGCAATTCAAATTAGTGGAGCATATAATATGATA	N	C	0.868	0.66836	Unknown
BARC_1.01_Gm01_48131192_T_C	Gm01	48131192	T	C	AAGTATTCAACTCATCTCTATTGCAACTTAGCCACATATATATAAAGGAAGAACCATCGC[T/C]AACTCATCTCAAACCTCGAATCAAGCTTAAATATTTGAGACGACAATAATAATCAATCCA	Y	D	0.988	0.66196	N
BARC_1.01_Gm01_48135844_C_A	Gm01	48135844	C	A	TAAATTATAGGTCACTCATTCAAAACGTCAAATTGTGTTTTTTTGCTGATAAAAAAAATT[C/A]TTGATGATATATTTTTTAAATACTTTTTATAAATAAAAAATTTCATTCACGGCATTTAAT	Y	C	0.568	0.43736	Y	Intron	0.221	0.258	0.233696	0.049	0.181
BARC_1.01_Gm01_48153926_A_G	Gm01	48153926	A	G	TCCCAATGGTTGATTGATTAATTGTAAAGGTGAACATCAAGCTTGATTATGAATTTTTTA[A/G]ACTATGGTGATTGGTTACAAACAGGCATGGCAATAGGCCCGACTCCCTAAGTCCTTCCTG	Y	D	0.996	0.66732	Y		0.234	0.26	0.240642	0.279	0.411
BARC_1.01_Gm01_48161147_A_G	Gm01	48161147	A	G	CAATTGCAATTCCATTCCGGTGTGCCTTCCACAAAAATGGCTATGTGGTTTGCCACATTT[A/G]TCGTGGGCGTCTCAGTTTTGAGAAATTGATGTGGGACTGCATTTGACTTTTTTTCCACTC	N	B	0.9	0.747	Unknown	Intron
BARC_1.01_Gm01_48168016_T_C	Gm01	48168016	T	C	AACCACCATAGAAGTATATATGTTATCGCGGATGTATCACTAATGCCAACATTAATTCTG[T/C]GGAAATGTGAATGTCGATTGCATGATGTAGATGTTGTACGTGGTGCTTGTTACAAAAATT	Y	C	0.935	0.71995	Y		0	0		0.052	0.017
BARC_1.01_Gm01_48172290_T_G	Gm01	48172290	T	G	CTGCTTCCCATGCATCAATGTTTTCATAGTCTAGTTATGAATTGAATTTTTAATTCGTGC[T/G]TATGAAGAAAAAAAATATTTATGAGGAGGAATTAACTTCTTAAATAAATGTAAAAGATAC	Y	B	0.813	0.67479	Y		0.218	0.263	0.236559	0.454	0.349
BARC_1.01_Gm01_48174685_A_G	Gm01	48174685	A	G	CCTCTGTTCTTTTCTCCCAATTATTATTATTATTATTATTATTATTAAAGATTATAAAGT[A/G]TATTACCTAAGATTTGCCTGAAAGTTTTGTGGCATTTGAAACTCATCCCAGAACCAATGT	Y	A	0.868	0.868	Y		0.347	0.326	0.336842	0.409	0.427
BARC_1.01_Gm01_48176350_G_A	Gm01	48176350	G	A	GGGTGGTGGTGGTGGTAGGACCCAGAAGACACTTACAGTAACAGCTTCTAGGACACTGGG[G/A]TTTTCACCAAGGTACTTGACGATCCACGTCAGCACACTGGCGGTGGTGTCACGAGCTGCG	Y	A	0.683	0.683	Y	CDS	0.349	0.489	0.429348	0.182	0.441
BARC_1.01_Gm01_48180103_A_G	Gm01	48180103	A	G	GGCCTTAGACGCGAAACCCCTTTTAAAGGCTCAAATCCCCCTCCTCCAGCAATCATGACA[A/G]ACATAGATACTCTTCATCAACTCCAAAACCACATTGCAGAGATGGAGCGACACCATGGGG	Y	C	0.878	0.67606	Y		0.36	0.479	0.419355	0.221	0.355
BARC_1.01_Gm01_48181097_C_T	Gm01	48181097	C	T	ATCGCACTACAATTATGGAGGAAGCTTTTAATTTGGAGGTACCTATTAGGTTACCCGCGA[C/T]GAAACTTCTCAGGCTGGGGTTAGACGACCAAATACTGCAGGTATCATCACGGTGTTGGTC	Y	A	0.765	0.765	Y		0.378	0.479	0.427807	0.405	0.489
BARC_1.01_Gm01_48183470_C_T	Gm01	48183470	C	T	TCAAGACGAATGATAACATGGTCCATCAAACTTTCAAAAATCGACCTTCACTACGAACCA[C/T]GCGACCCCATGGAGACATAATTCATGGCTGACTTTCTGGCAGAATTTGTCGAAAATGATA	Y	B	0.988	0.82004	Y		0.378	0.479	0.427807	0.387	0.494
BARC_1.01_Gm01_48184531_A_G	Gm01	48184531	A	G	CATCGACTACTTCACCATATGGATATAAGCAAGACCACTATGGGAAATTACGACTAGTGA[A/G]GTGGAGAAACTCACATGGAAACACCTCATATGCAAGTATGAACTCTCATACACCATTGTC	Y	B	0.494	0.41002	Y		0.383	0.489	0.43617	0.253	0.375
BARC_1.01_Gm01_48185808_G_A	Gm01	48185808	G	A	GCGAGTGACACGTATGCAAGAGCACACCACCATGTCTCTAGTATGTGTCACTCCATGAGT[G/A]ACACGTATGCAAGAGCACGACACTATGACTCCAGTACGACTCCCCGAACAACATGTATGC	Y	A	0.434	0.434	Y		0.368	0.479	0.42328	0.379	0.49
BARC_1.01_Gm01_48186872_A_G	Gm01	48186872	A	G	AGGAAAATAAACAAAAGGCAACCTAAACAGTGGCATTATCGCCTTTCTCCTCAAAGCCCA[A/G]CTCCTCTTCACTAGCAGCCTCTTCCTCCGCAGTAATTTCTTGCTCGTCAAGTAGAACATC	Y	B	0.976	0.81008	Y		0.374	0.484	0.427807	0.245	0.369
BARC_1.01_Gm01_48190654_C_T	Gm01	48190654	C	T	AATTTTGTTAACATTTCCGACACTAAGTCTACATGCATCATTAGGGTCACCATCCAAAGG[C/T]GCCTCATTGGGTTGAAGGAGAAATATGCTTATAAACTATCCTCCTCAACTCCTTAATAAT	Y	B	1	0.83	Y		0.16	0.333	0.243243	0.245	0.247
BARC_1.01_Gm01_48191967_T_C	Gm01	48191967	T	C	CTAAATTTGAACATCATCTGCTAGTATTCACATGTGAAGATTAATATTTTAAAATTTAAA[T/C]ATTTTTCATATAAAAAATTAAACAGGCATAGCATAGTTTTTTTTCAAATTTGAACAAGCT	N	D	0.451	0.30217	Unknown
BARC_1.01_Gm01_48199136_G_A	Gm01	48199136	G	A	CTATGGGTTGCAAATAGAGTAGAGGAATATGGAAGGAAGGCGAGAGGAGGTTGATGGAGG[G/A]GAAGAGGAGATTGTCGTGTTACCAAAAGTAGAGGAGGAGAAACGAGGTGGAATTGAGACG	Y	C	0.996	0.76692	Y		0.156	0.319	0.234043	0.247	0.242
BARC_1.01_Gm01_48200105_A_G	Gm01	48200105	A	G	AAGGTGGTAGAGGAAAAAGAAGGTACTAGGTCAACAAGTGCTAATCCCAAGGAGGTGGCA[A/G]AAAAACATAAAGCAAGCACTGAAATCAAAGAAGAGACACATATACATGACATGCAGATCC	Y	D	0.9	0.603	Y		0.156	0.328	0.238095	0.25	0.247
BARC_1.01_Gm01_48204485_G_A	Gm01	48204485	G	A	TCGCGTTCCACCAGAAGCTGAAAAATGATTTGGAGAGGCTGCTAGAGGACCATGCGACTA[G/A]AGGAGTTCAAGAATGTCGTTGTCGAAGGTTACGACGCGACACTGCTCGTCGGCTATGACG	Y	B	0.949	0.78767	Y		0.271	0.216	0.240642	0.113	0.202
BARC_1.01_Gm01_48219980_C_T	Gm01	48219980	C	T	GTTAGTATCAATAAAAAAAAAATCAATGTTAATACTGTAAAGACGATGTTGATAGCTCTA[C/T]TTCAATGAAAACAAAGAGATGACCTCCACGCTGTGTTGGAAAAATTTGAACTTTCCCGCT	Y	B	0.868	0.72044	Y		0.149	0.324	0.232432	0.234	0.422
BARC_1.01_Gm01_48221106_C_T	Gm01	48221106	C	T	GGTCTTTACCAGGACTAACTAGTAAAAGGCCAACAGTCAAAAGCGAACTTAGAAATCAAT[C/T]GCACTCTAGTAAAAAATCTCAATATCATATTCGTTTAGAAGAAAAACAAAAATTGCATTT	Y	C	0.536	0.41272	Y	5UTR	0.156	0.323	0.236842	0.245	0.417
BARC_1.01_Gm01_48222840_C_T	Gm01	48222840	C	T	ACTTTTTCCCGATGTGGGACTTCACCTCACACTTGTAACCCAACACGTTGTTGCTAGTTG[C/T]TAGATCATAGCCGACACTAATTTGTTTGAGTTGGTCAAAAGCAACCAACCCTAAAATTAG	Y	B	0.9	0.747	Y		0.332	0.274	0.299465	0.031	0.214
BARC_1.01_Gm01_48225979_T_C	Gm01	48225979	T	C	GAGGCAATAAGGGACTTGTGAAGAAAATCAAATACAAGAGCCATATTAATTTAGTATTTA[T/C]ATTGAACAGTGCTAAGCTCAGCAGATATAGGGTTCATTTTATTTAGTCAAAACTTCCAAT	Y	C	0.935	0.71995	Y		0.332	0.274	0.299465	0.095	0.499
BARC_1.01_Gm01_48256429_T_C	Gm01	48256429	T	C	TCATATAAAGACAATGTGATGACTCCGTTCTCAGTCCAATAAAATCAACAAAGGCTAAAA[T/C]TAAAATGGTATACACAGCAGAAAAAAAGAGAAGGCATGAACAAGTCTATGCTTTGCTAAA	Y	B	0.965	0.80095	Y		0.282	0.247	0.26087	0.465	0.363
BARC_1.01_Gm01_48264988_A_G	Gm01	48264988	A	G	AAAAAACAAACCTTTTTCCTTCAGAGCCCCAAATCAAAACCCTAATCTACCATTTAACAC[A/G]CGAAAACAAAAAATTAAAATAGGAACAATCGGAATACCTTGTCAGATACCTCCGAGAGGA	N	B	0.744	0.61752	Unknown	Intron
BARC_1.01_Gm01_48267606_T_C	Gm01	48267606	T	C	AGTGACCAGGCCTTACCACTCTCCACTCAATCGACAATAAATGCTTGTGTGTAGTGTTAT[T/C]AGCCTTAGTTACAACCAGTACCCTATCGCAAACAAGGGCTTCATGAATGCCCTTGTGGAG	Y	A	1	1	Y	Intron	0.302	0.271	0.281915	0.391	0.401
BARC_1.01_Gm01_48271720_A_G	Gm01	48271720	A	G	ACTGAAGACACAAACGCTGAGTGCGGGCGTTAAGCGCGAGACTCAACACCCGCGCTAAGC[A/G]GGCAACAGGTGCTAAGCGGGCAAAACATAAACAGAATGCGCTAAGCGAGAGAAGCTCGCT	Y	B	0.62	0.5146	N
BARC_1.01_Gm01_48273314_A_G	Gm01	48273314	A	G	GCTTGGTCATTGTTTGTGTTTAACAGTCCAAGATAGTCCAAGGTTGCTTCGCAACCCTCA[A/G]TTAGGTGATAAAAATTTACCATACTCCTCACGCACATGTCTTCCTTTTTTCACATCCAAT	Y	A	1	1	Y		0.3	0.271	0.281915	0.432	0.382
BARC_1.01_Gm01_48299897_A_G	Gm01	48299897	A	G	ATATATATAATATGCTTGCTGTTGTACGAGTTAAATGAGTGTAGATTGTCTTGGCTTACT[A/G]CTGTAGCTCAAGTTAAACCATAGCCGTTGTTTTGCCCCCATTTCACCTACCCAATTCATC	N	C	0.9	0.693	Unknown
BARC_1.01_Gm01_48301831_A_G	Gm01	48301831	A	G	CCCCTCTCTTCGCTGCAACCATTAGAGACGCGAATCTGGCCACCATGACTGTCGCCGCCC[A/G]CTATTGATCTTACCTTCTTCCCTCTTTTGTACTGAATTGTGGGCTGTTGTTGATGGTGTT	Y	A	1	1	Y		0.161	0.047	0.1	0.126	0.113
BARC_1.01_Gm01_48303876_G_A	Gm01	48303876	G	A	GCTAAATATTTTCCAATAGGGAATTTCTTGGATACTAACTTGGGCCATACTCCAAGCTTT[G/A]TACATAGTATCCATGCATCACGGGTAGTGGTAAGACAAGACTTGCAATGGAGAATTGGGG	Y	D	1	0.67	Y		0.38	0.388	0.380435	0.464	0.416
BARC_1.01_Gm01_48306028_T_C	Gm01	48306028	T	C	TTGCACTGAGCATGCACTCTTGGGCTTAGCGAGAATAGCGGTTTAATCACTCGCTCAGCG[T/C]GACCTTGGGCTTTCTCGTGGGTCTTCTTTGCGCTAACCCTGAGCTTGCCCGCTAAGCGAG	Y	B	0.553	0.45899	Y		0.389	0.394	0.389189	0.353	0.382
BARC_1.01_Gm01_48311411_A_C	Gm01	48311411	A	C	TTAAATTTATTTTCAAGCATAGATTTTTTATTTAAATTTGAAAATACTCGTATAATATAT[A/C]ACAAAAACTTCTAGTCGAGTGGCAAAAGTAACCTTCACAATAGTAGTATTTTGGTACACA	Y	C	0.935	0.71995	Y		0.385	0.398	0.389189	0.143	0.311
BARC_1.01_Gm01_48321733_A_G	Gm01	48321733	A	G	ACCCGACCGGTATGCATCTCGAACCGGGTTTAACGAACAAAGAACAAAATTGCTAGAAAC[A/G]GAGAAAGCTAGTTAGATCAAAGATCTGAACCGAGATCGGAGAAGAAGAAGAGAATGGGAA	Y	B	0.9	0.747	Y		0.406	0.245	0.322751	0.38	0.43
BARC_1.01_Gm01_48326572_C_T	Gm01	48326572	C	T	TTGGCTTTTGACTTTTGAGTAATAATAATAATTTCTATTTAAAGAGTATTTGATATTGTG[C/T]TGTAGGAGTACCCTGCACCGTAGAGGAATACTCTAGGTTTATTTTCTCTTTATTCCCCAA	Y	B	0.9	0.747	Y	Intron	0.404	0.245	0.322751	0.073	0.475
BARC_1.01_Gm01_48335341_T_C	Gm01	48335341	T	C	TGCTTTCTCCTCCCCCCACCTAACCCCACTTTCTCCATTCCATCTGGGTATTCCCCGAAT[T/C]GCAAAAAGCCATGGTCTTTGCCAAAATCGCATCACTCGTCGCCCCCAATTCACATTCCCT	Y	B	0.824	0.68392	Y	5UTR	0.38	0.231	0.302198	0.073	0.485
BARC_1.01_Gm01_48350630_C_T	Gm01	48350630	C	T	CCAACTCGATTTCAACAAGAATCAGCTCGTGGAGAAGATCCGAAGGCTGAAGAAGAAGTG[C/T]TGGAACGTCCTTAACAAGATTTGCTCCGGCAAGGAATTCTCCTTCAAGAGCGCTCACGAT	Y	C	0.63	0.4851	Y		0.147	0.226	0.185185	0.05	0.142
BARC_1.01_Gm01_48351519_G_A	Gm01	48351519	G	A	CTAACTGTTTAAAAGAACTAAACATAAATTTACTTAACTGTCATGTACTCATGTCAAAAC[G/A]CCTTACCTTTGTAACCTTGCAAGCCCCATCATATTATGCAGCATGGTCAGTCGGAACTAG	Y	A	1	1	Y		0.147	0.234	0.189474	0.147	0.177
BARC_1.01_Gm01_48362668_T_C	Gm01	48362668	T	C	AGGGTTTATAACTGCGAAATCGAGATTCCGCGCCGACACCGGTTGCCGCGTGATTATCCC[T/C]GTGTCCAGCTCGATCCGAACCTTCTCCACCATCGCGTGAACTAGCTCCATTCTCTCCAGC	Y	B	0.877	0.72791	Y	CDS	0.309	0.218	0.262032	0.074	0.487
BARC_1.01_Gm01_48364020_A_C	Gm01	48364020	A	C	GCTGGTGTTGGCCAGGCCAATGCCGTTAGCGGGGTTAAACTGCCCCGTTAAGAAACGTGC[A/C]GCGGAGAGGGAGCCACGTGCCGCGGAGGCCACGAGGGAGTTGAAGCCGGAGAACACGTTG	Y	A	0.64	0.64	Y	CDS	0.432	0.395	0.412698	0.258	0.364
BARC_1.01_Gm01_48369203_T_G	Gm01	48369203	T	G	GAGTAGGAGACTGAGAACAAGTGGGAGTGAGTAATATATCGAGTGCGAGCGAGAGTGAGT[T/G]TGCTGAGGGGAGGAGTTGCAACACTGTGGAGGAAGTGAGAGCATCAATGTGAGAGTGAGG	Y	B	0.949	0.78767	Y		0.115	0.205	0.157895	0.346	0.29
BARC_1.01_Gm01_48374396_T_C	Gm01	48374396	T	C	GAAATGCCTTTCCCTGCAACCACTAACAATTTTAGCCGTCCAAGTCAACGTGTTATGTCG[T/C]GACACCCCATCGAAGACAACACTCGCATCTTCAAGGCATGTGAATCTCCCGTAAAAGTTG	Y	B	1	0.83	Y	CDS	0.116	0.197	0.154255	0.286	0.348
BARC_1.01_Gm01_48376246_T_G	Gm01	48376246	T	G	GCTTTCTCACATTCCTGGAAGTGTTTGATCAAGTACCCCTGTACATTTGGTATTCAGCAT[T/G]CGCTTGAATTCATCAAATATGGTCGGCTGAGAGAAGAAATGAAAATTCATCAAGATTCAT	Y	C	1	0.77	Y		0.089	0.207	0.143617	0.232	0.177
BARC_1.01_Gm01_48382779_A_G	Gm01	48382779	A	G	TTGAGGGATGATAGCTCCGACAAGAAGCCTTGTTGTGCGGAGACAAAGACATCGTTGGTG[A/G]GGTCGGGGACGAGTTTGGTCCACTTGCCACCTTTGACTTCATAAACAGGTTCGGAGAAAA	Y	B	0.878	0.72874	Y	CDS	0.084	0.197	0.138298	0.103	0.396
BARC_1.01_Gm01_48384873_A_C	Gm01	48384873	A	C	ATGGGCTACCTTACTCTACCTCGTTACCCCTCTGACCCTCTCCCTCTCCCTGTTGTCCCT[A/C]TGTTATGTTTACTTAATGTAATGTTTTGGCTGCACGTGCCTATAGCTGTCTTAGGAGGTG	Y	C	0.988	0.76076	Y		0.074	0.182	0.126316	0.392	0.216
BARC_1.01_Gm01_48403227_C_T	Gm01	48403227	C	T	AAAAGGAGCATAAATAAAGAAAAAAAAGAAGAAAATTAGAAGAAGCCCAAGTCCAGCCAG[C/T]GCGCAAGAAGGCAAGGCGCTAATTGCACGACACGCGCTGAGTACAAAGCTTCGCGCTCAG	Y	B	0.534	0.44322	N
BARC_1.01_Gm01_48408553_T_C	Gm01	48408553	T	C	TCACATCATGTCAACTAGATTTTTTGAGGATCTGCAATTAGTGTGGGAGCAGTTTTCTGA[T/C]AGCATTTGAGGCATGATTTTGTGCAACTTTCGAAGTGGAGGAATGAAAGAGGCCAATTTG	Y	B	1	0.83	Y		0.068	0.184	0.121693	0.299	0.321
BARC_1.01_Gm01_48418410_G_T	Gm01	48418410	G	T	TACGTGAGTAAATAATCACTTTTGGTTCTTGTATTTTATATTCGGTGATAATTAGATTTT[G/T]ATATTTTATAATGATTAATTAATTTAATCTACAAAATTACAAATGTTGTGAGAAATTAGT	Y	B	0.662	0.54946	Y		0.457	0.452	0.497268	0.398	0.466
BARC_1.01_Gm01_48419903_T_G	Gm01	48419903	T	G	TTAGTTTGTACTTGTAGTCCCTAAAAAAGTTTGACTCATCTGACTCCTAAAATATTTTCT[T/G]TCAATAAGTGTTTATCATGTCATAACTATAATAGCCTGTGATAATTTAAAAATGTAAACA	Y	B	0.899	0.74617	Y	Intron	0.419	0.414	0.416216	0.266	0.366
BARC_1.01_Gm01_48425002_T_C	Gm01	48425002	T	C	AAGAAAAAGATATTTATTTTAAAATTAGTCCCACAGATTAGTCCATTTAACCCGCAAGAT[T/C]CACCAGACAGAAACCGACCAATCTATTAATTCTCTATAAAAGTGTGGGGTTAGTTGACCC	Y	B	1	0.83	Y	Intron	0.139	0.282	0.206612	0.356	0.398
BARC_1.01_Gm01_48433955_G_T	Gm01	48433955	G	T	CATCTTCCCAGAGCGATGCAAGGGAAACAAGTTGATTGCACATTCCAGAGGAGGAAACAA[G/T]GCATGAAGCATTAGGTCAAGTTGTGCTTCCTTAGTAGGTGCCAACTGATGGTGTGTTTCC	Y	C	1	0.77	Y		0.453	0.448	0.497326	0.021	0.343
BARC_1.01_Gm01_48436572_C_T	Gm01	48436572	C	T	ACGAAATGTGATGCAAATTAAATTCGTAAACCTGTATGCATGTAGTACCATTTTGGAAAA[C/T]ACAGTGAATGTAGCCCAGGAGTCCGTGTAGTCAACAAATAGCCACACAATGGGCAACCCG	N	C	0.719	0.55363	Unknown
BARC_1.01_Gm01_48442507_T_C	Gm01	48442507	T	C	GGTATGATAAGAATACTTTGCCCTTCAATTGTCTCAGGCCGCCAAACTACTCAAAAGAGT[T/C]TTATCCTATCAATAATGAACATGTGAAGATATTTGTGTCCGTGAGCTACGTTTTTATGTC	Y	C	1	0.77	Y		0.063	0.184	0.121693	0.185	0.145
BARC_1.01_Gm01_48466101_C_T	Gm01	48466101	C	T	AGGCTTTTAATTAAATAGGTCAGTTCAAGTCAGACTTTATGTAGGTTAGGTCGTAGGTCC[C/T]TTTAGGCCGGTCTGTCCTATTCTCACCCCTAATTACACATCGAAAGCAATTATTTTAGCG	Y	C	0.53	0.4081	Y		0.071	0.278	0.177966	0.215	0.191
BARC_1.01_Gm01_48469239_T_C	Gm01	48469239	T	C	GATGAAAAAAAAATTTACGTCCATAAAAAAAAACTTTGTTATTTACGTTTATAACGAGTG[T/C]CCTTTGGGGAACCTACTCCCCACCGCACTGGATCACAGCGCCAACATAACTGAACCTTTC	Y	B	0.75	0.6225	Y		0.453	0.453	0.5	0.063	0.358
BARC_1.01_Gm01_48490333_T_C	Gm01	48490333	T	C	AGTATAGGTAGTACTAATTAATTTCTTTAAGTCATTGTCAATTGTACATTCCCATACCTG[T/C]ACAACATCTAGATCTCTCTCATTCTGGTGTGATTCGTTTGAAGTGTTACATGTCCACCAG	Y	C	0.431	0.33187	Y		0.453	0.447	0.497326	0.18	0.392
BARC_1.01_Gm01_48491697_C_T	Gm01	48491697	C	T	CGACATTTACCACTGTGACTTCTGTCGTGAACCACTGTGCGCCGTCGCCAAAAGGGATTT[C/T]TGGCAGTGGTGTTTTATTTTTTACTTCTTTCCTCCTTTCCTCTTTTCTTCCTCTACTTCT	Y	B	0.915	0.75945	Y		0.436	0.457	0.48913	0.177	0.4
BARC_1.01_Gm01_48497518_T_C	Gm01	48497518	T	C	TCATTTGATACCAAACCAGATAACTACCAAGGCCATCTACTCTACCATTACTCATCCTAG[T/C]TGCAGCATCATCCCCATAGACTTATGGCATTTTAGAATGGGACACCCATCGAATGAAAGG	Y	A	0.8	0.8	N
BARC_1.01_Gm01_48499382_T_C	Gm01	48499382	T	C	GATATCATACTCACAGGGAACAGTATGCTGGAAATACAAGATATCACCACCCTCTTGGAT[T/C]AAACATTCAAAATAAAAGATCTTGGTGACTTGAAGTTCTTTCTGGGACTCGAGATTGCCC	N	B	0.768	0.63744	Unknown
BARC_1.01_Gm01_48501783_G_A	Gm01	48501783	G	A	GACACCCACGAACCAATTTAACTACAACGACTATGTGAAGTTTCCCCTTAATTTGGATTC[G/A]GCATCAGAAATTGGGGCTAACAAGAAGGCTGGCCTTATATATATATATATATATATATAT	Y	A	0.841	0.841	Y		0.453	0.437	0.491979	0.115	0.368
BARC_1.01_Gm01_48514567_A_C	Gm01	48514567	A	C	ATCAAGTTTCATCTAGAACTATTGAGCATTCATAATTGGAGAGATTTGATGAGCTTATCT[A/C]ATGGAAAATATAGACCACTCCTCCCTCCCTATCTTAAAGTTCAAAATTAACAAATTAATA	Y	B	0.899	0.74617	Y		0.438	0.37	0.402116	0.435	0.462
BARC_1.01_Gm01_48520097_A_G	Gm01	48520097	A	G	TTTCTCCAGAAACTTTTCTCTCCAAAATCAAACCTTCTTCACTCTTCATGCATCACCTCT[A/G]CCTCCCCGCTCATTGCCACTGTAGCCACCACTGTGTCGTTCCTTCCCACTTGCGTCTTGC	Y	C	0.832	0.64064	Y		0.437	0.447	0.494565	0.342	0.456
BARC_1.01_Gm01_48524758_C_T	Gm01	48524758	C	T	CGTTGCCAAGCGCCTCCCCTTCCCCGGCTCCGGCGATGGCCCCGATGGCTACTGGAACCG[C/T]GGCATCTCCGCGTGCGCCGTCTGCGATGGCGCCGCGCCGATCTTCCGGAACAAGCCACTG	Y	A	0.429	0.429	Y	CDS	0.463	0.436	0.486631	0.261	0.413
BARC_1.01_Gm01_48526612_A_G	Gm01	48526612	A	G	GAATGACACCCAGTAGCTCTCCATGCAACTGCAGAGGATGATCTGGCCCACCATCCTTCA[A/G]CCCAACCATCACCCCTTAATTCTCCCAGTGTAAACCTGATTCATGGGCCTAAATTCCTTC	Y	A	0.976	0.976	Y	Intron	0.458	0.436	0.489362	0.125	0.369
BARC_1.01_Gm01_48532643_C_T	Gm01	48532643	C	T	TTTATTTAAGGTTTCTTTTCACCTTTTACACAAGCAAACAAGTGATTTTTTTTTTACTTC[C/T]TTTTTTTTTACCAAACAACCTAAAAAAATATTTAATTTTCTACTCTCCTTTTTCTTCCTT	Y	C	0.689	0.53053	N
BARC_1.01_Gm01_48533949_A_C	Gm01	48533949	A	C	TTTATGGTTCATATAGTTGTAAAATAATTATTCAATCTTATTTATACAAATATGATTTTT[A/C]TATTTGAACACTATACACAATTATTGTACTCGTGGTGCAGCAGTTGGCTTTTCTATTTCA	Y	B	0.988	0.82004	Y		0.457	0.432	0.486631	0.203	0.394
BARC_1.01_Gm01_48542118_T_C	Gm01	48542118	T	C	GGAGCCAGACACGACGGCAAGGATGATGTCCTCGTCGTGGTGGGGGAGGGCAGCAGGGCA[T/C]GAGGGAGTGGGGACAGGTTTGGGAATGTGGAGGTCGAGGTCGTCCTCGGGGGAAGAGCGG	N	B	0.569	0.47227	Unknown	CDS
BARC_1.01_Gm01_48558309_T_G	Gm01	48558309	T	G	TCCCCCGCCACGCCCAACGTCCACTCAAGGTATGCTTTTTTTTTTCGTTCTTCCTCTTCT[T/G]TTACTCGAACGTAGTACTCCTAAAGATCTGAAAAGGGTACAAGATCTGGCACTAAAGATG	Y	B	1	0.83	Y		0.211	0.432	0.166667	0.091	0.322
BARC_1.01_Gm01_48562849_G_A	Gm01	48562849	G	A	CTCCCGGCGACTGGACGACGGCGTGTGAACTTCACGCGTCAGAATTAGCGTGAGACGGTG[G/A]CGACGTGACTTCCAGGAGTAAGTCGTGCTCTTCAAGGTGCACCCAACCCTGGGTTCACCG	Y	B	0.834	0.69222	Y		0.031	0	0.015625	0.207	0.079
BARC_1.01_Gm01_48565309_G_A	Gm01	48565309	G	A	TATCTTGGGGGTCCTGCAAACAAAAAGTCACAGTCAGATCCAGCACTGAAGCTGAATATC[G/A]CAGTCATAGCAGAATTACAAGTACTATTCACTACTCCTGTCCTTTTCTGTGACAACCAAA	Y	A	0.759	0.759	Y		0.419	0.276	0.423913	0.159	0.346
BARC_1.01_Gm01_48572981_T_C	Gm01	48572981	T	C	CTGTGGGGTGGAAACTCAAACGAAAAGAAGATTGTCTGGGAAAATTGGGGTACAATTTGT[T/C]TGCCAAAGGAGAAAGGAGGTTTGGGTATTAGGGATTTGGGGAAGTTTAACTTGGCTTTAC	Y	B	0.965	0.80095	N
BARC_1.01_Gm01_48574425_C_T	Gm01	48574425	C	T	GGCTGACCCGACCCAACCCTACCCGATAATTCATTCAAAAGCTTAGCCCTCCCCAGCACC[C/T]AGTGTCCATATCGCGACCCAGCCGCACCCAGTCACGACACCCTCTACAGTCTGCACGTAG	N	B	0.708	0.58764	Unknown
BARC_1.01_Gm01_48577518_C_T	Gm01	48577518	C	T	AAAGTGATGCGGCTCCTCCGCCGTTCACTTCAACCCCCGGCGGCAGCAACCCACTGATTC[C/T]GGCAGCTATGGGAATGAGTGATGATGTTTTGAAGACGAAGGCTTTGGAAGAGGGTAAGTG	Y	C	1	0.77	N
BARC_1.01_Gm01_48591999_A_G	Gm01	48591999	A	G	TTGGAAAAATGATCCACAACGACCAAGATAGTTGTAAACCTGTGGAAAGGAGGCAGCCCC[A/G]TGATGAAGTCTAAGGAAACATCTTCCCATACTGATGAAGGAACTGGAAAAGGCTGGAGAA	N	A	0.949	0.949	Unknown
BARC_1.01_Gm01_48593774_A_G	Gm01	48593774	A	G	AAGTAATGCCGCCATTTTCGAACCGCAACCGTAATTGCATGAAGCTCTCTGACATAAGCA[A/G]AGGCACACTGCAAACGAGGACACAACACCTTGCTATAATAGGAAATGGGGTGTGAATTCT	Y	B	1	0.83	Y		0.404	0.292	0.440217	0.167	0.375
BARC_1.01_Gm01_48596530_C_T	Gm01	48596530	C	T	AAACCATCTAGTAAATCATCAATCGTGGGCATAGGAAAACGATCTTTGATCGTAATTGCG[C/T]TCAAGGCCCTGTAGTCTACGCAACAGTGCCAACTTCTGTTTTTCTTCTTGACAAAAAGGA	Y	A	1	1	Y		0.399	0.289	0.443243	0.476	0.459
BARC_1.01_Gm01_48597416_A_G	Gm01	48597416	A	G	ATTCAAGCTAATATGAGGAATTGGGATTGGGTCTGGGTCTGGGTCTGGGGGCTCCATATT[A/G]GTTGTGTGTAAGGAATGGGTATCAGAATCTGCGACAAAGGGTTCGATGTCGTCGTCTGCA	Y	A	1	1	Y		0.406	0.292	0.435754	0.424	0.44
BARC_1.01_Gm01_48617111_G_A	Gm01	48617111	G	A	AGCAAGTGAAAAGTATAAAGCGAATATTTATGGCTTCTCTCTCGCTTTGTTCCTCAAACT[G/A]TTCTCTTATATTGCTCTTCATATGGCGGCAGATGGCGGTGCAGGGAGACCGAACTGGTGA	Y	A	0.949	0.949	Y		0.421	0.292	0.432432	0.227	0.37
BARC_1.01_Gm01_48619590_C_T	Gm01	48619590	C	T	AGGTAAATTTGACCCCAATAGGGGCACCCCCTCCCCCTCCCGAAATTCCCAACTATCTAA[C/T]CCTTTATCCCTGTCGGAGTACTTTAGTGAGAAACTTGTGTAGAAATATTTATCTTTTAGT	Y	D	0.868	0.58156	Y		0.414	0.292	0.434783	0.203	0.372
BARC_1.01_Gm01_48643542_A_C	Gm01	48643542	A	C	ATCATCGAGGAAGAAGTCACTAATGTGGATGATGGCTCCTCCAAGGAGCCCAACCAAGAA[A/C]TGCCACATCCATAGATCAGTTTTAATGCATTGCCCGACCACCCCACCTACAAGGATCTCC	Y	C	0.996	0.76692	Y		0.076	0	0.037234	0.245	0.277
BARC_1.01_Gm01_48644761_T_C	Gm01	48644761	T	C	CCTAACTAGTGTCTTCTCTTTTCTTCAGGAAAATGTATTCTATCTTAGGGGTTCCAAATT[T/C]ATCATTGGCCAATGTCATTTAGAGTACCTTGGTCACATTATATCTCAGTTTGAAGTGGCA	N	C	0.935	0.71995	Unknown
BARC_1.01_Gm01_48652555_T_C	Gm01	48652555	T	C	GAGCGCCGCGAGAATCACCACGAAGTCCGACTCAAGCGCCACCGCCTCCGGCGGCGCCGC[T/C]ACCGCTGCCAGCGAGGTGGCGTTGTCCGCGGACCCGAGAATTCTGAACGCTCGCGTCATC	Y	B	0.633	0.52539	Y	CDS	0.095	0	0.0471204	0.437	0.215
BARC_1.01_Gm01_48675089_C_T	Gm01	48675089	C	T	ATAAAAACTTCACCAAATGAGAGCTAAAAGTGTGCCGTGAGGGAGAAGCAATGGATTAAC[C/T]AGTTATAATTCTTTATTAGGTGTGATTGCAACACACCATTTAACATATTATTTCTAATAA	Y	C	1	0.77	Y		0.073	0	0.0364583	0.421	0.216
BARC_1.01_Gm01_48676606_G_A	Gm01	48676606	G	A	GTGAGTGTTTGTTGTCGTCGGTGGTCGGTGATCCACGCGCATTGTTTACAGACACTGGCG[G/A]ACCTACATGTGAGTGAGGGTGTGCACTTGCACCCCCTCATTTTTTAAAATTAATTAAATT	N	B	0.834	0.69222	Unknown
BARC_1.01_Gm01_48681493_G_A	Gm01	48681493	G	A	ACCCCATCCTTCTACGATGATCCATAGGGCGCCTTGTTTAAGTTGCAATAGAGAGGAACG[G/A]TGAATAACTATCTCACTGAATATGAGTGCCTCGCAAAACGGATCGTAGGCTTCGCTCCCC	Y	B	1	0.83	Y	Intron	0.375	0.284	0.45	0.141	0.352
BARC_1.01_Gm01_48682434_G_A	Gm01	48682434	G	A	ATGTGCCTCTATCTCCAACACAGGTCTTAGCCCAACAACTTAAATGTTTCGTGCACACAC[G/A]CATCTCTGCCTTGTACCACATAACACCCATTCCTAACCCAGCCCAACTGTCTTCCACCCA	Y	A	0.9	0.9	Y	Intron	0.304	0.279	0.483696	0.443	0.473
BARC_1.01_Gm01_48684218_C_T	Gm01	48684218	C	T	TTTGTCCTCGTCTCCAACGAGCGTCCACGTATGTCTGGGAGCTTCACGCTATCACATCAG[C/T]AGTTTGGAAATGGCGCTAGTACCTCTTGGACCACCTTTTTGTAATTCTGACCGATCACCG	Y	A	1	1	Y	Intron	0.378	0.274	0.441341	0.145	0.347
BARC_1.01_Gm01_48685149_G_A	Gm01	48685149	G	A	AAGCGGCACCAAGCTCCAAATGTGCACAACATACCATCCTCAATTCGACGGCCAAACTGA[G/A]GTTTTGAATAGAGTTCTCGAGCAATACCTCTGTGCCTTTGTGCATAACCGGTCCTCCAAT	Y	A	1	1	Y	Intron	0.364	0.284	0.455556	0.151	0.36
BARC_1.01_Gm01_48715441_G_A	Gm01	48715441	G	A	GATCTAAAGCAAATCTTAAACACACAAATCAAGATAGGAAAGAAAAAAAAGCACTAAAAA[G/A]AATTCAATTTTTGTTAAGTTGAAGGGAAATATCCAAATACATATCTTATTCTTTTAAATA	Y	A	0.714	0.714	N	Intron
BARC_1.01_Gm01_48723511_C_T	Gm01	48723511	C	T	ATTAATAAAATAGTTTATTAAATGAGATTCAATATAAAAAATCCATGTGACTTGTAATGT[C/T]ATTGATACTTCTGACGTGATTTCATACATGTATCACTGACGTGTCCAACTAACGGGCACG	Y	D	0.692	0.46364	Y		0.495	0.182	0.342105	0.091	0.264
BARC_1.01_Gm01_48724888_T_C	Gm01	48724888	T	C	CCCTCCAAACCTCATATGAAATTAGACATACCTCATTTCAATGGCCAAGATCCGGTTGGC[T/C]GGATCTTCAAAATCTAACAATTCTTCGACTATCAAGGACCGCCAAACCATGAACGACTTA	Y	A	0.81	0.81	Y		0.495	0.182	0.342105	0.102	0.265
BARC_1.01_Gm01_48726791_G_T	Gm01	48726791	G	T	AAAACCATGATGACTCAGGCCCCTGTCCTTACAACTCCAGACTTCACCATTCCCTTTACC[G/T]TCGAAACGGACGCTTTAGGCACAACCATGGAAGCAGTCTTGTTGCAGAATTCCCACCCCA	Y	A	0.996	0.996	Y		0.489	0.172	0.324324	0.148	0.279
BARC_1.01_Gm01_48729150_A_G	Gm01	48729150	A	G	TGTTCTTGGAAACCATTTGCAAGCTTCATGGATTTCCATGCAATTTAGTGTCACACCACA[A/G]CCCTATTTTCATCAGTACCTTCTGGTGAGAATTGTTCTGCCTGAGTGGCACTAAGCTTCG	Y	C	1	0.77	Y		0.161	0.198	0.174603	0.01	0.126
BARC_1.01_Gm01_48730393_C_T	Gm01	48730393	C	T	GCAAGCCAGTCTCGCTAAGCAAGCCTTTGGAATCTGAAAGGTCCAAGAGCCTTTAAAATA[C/T]TGAAGTTGGTGGAGTTTAGAGAGTCAAAAAACAGAGCACAAGGGGAAGCTGAAGCAACAA	Y	B	0.719	0.59677	Y		0.479	0.182	0.349206	0.094	0.267
BARC_1.01_Gm01_48732497_G_A	Gm01	48732497	G	A	GTGGCGGTTGTTTGAACAGTTTTATAGAAGCTTCTGGCATAAGGGACAAATAAATCTTTA[G/A]GTTTTTTGTTTGGTCGTGGTTGTGGTTGTGGTTTGATTGATGTTATGGGACAAGGACAGG	Y	A	1	1	Y		0.431	0.279	0.421622	0.01	0.389
BARC_1.01_Gm01_48740400_G_A	Gm01	48740400	G	A	CTTTGGAAACTGAGGCGAAGGACAAGAAGAATTTCGGTAGGGTTTTGGGTTTGGGGATGG[G/A]TTCGGTTTGTTTGGGGGTTTAGGGTACTTAGCGTTTGGGGAAGAAACTAAGGATATTATT	Y	A	0.9	0.9	Y	Intron	0.437	0.281	0.418478	0.406	0.422
BARC_1.01_Gm01_48755772_G_T	Gm01	48755772	G	T	CCTAGGAGCCGGTGAGGCGAAGAACCTATCGGGCATGTTCATCGTAATCGCAGCGGCGGG[G/T]ACTTAATGGCCAGCATAAAGCCTTTGCCGGAGGCTGTGCGTAGCTCACTGCGTTCTGGCA	Y	B	0.824	0.68392	Y		0.021	0	0.0104167	0.438	0.15
BARC_1.01_Gm01_48758453_C_T	Gm01	48758453	C	T	TCCTTGAAGTGTCTATCCATATGGAAGTGTGGGCTCAAGTGTTTGAGCCTATAATTTTTT[C/T]TTTTAATCAAACACTTGGTGAGGAGTTTGCAACATGGGTGTACACTTGTACTGGTGTCAG	Y	C	0.988	0.76076	Y	Intron	0.419	0.282	0.429348	0.323	0.489
BARC_1.01_Gm01_48771413_T_C	Gm01	48771413	T	C	GTGTCCCACCTCTTGCAAGTCACACATCCCACCACATTGCATCTCTCTCTTGCTTGTAGC[T/C]GTGCCAAACAACCAAGAACATATTTTTATTTTTTAAAAGAAATTATTAATTGAACCCACA	Y	C	0.897	0.69069	Y		0.052	0	0.0260417	0.459	0.193
BARC_1.01_Gm01_48777716_C_T	Gm01	48777716	C	T	TTACTTTCATTTTTCATAAGCAAATTAACGGAGTTTTCATTTAAAAATTGAAATTTCTCA[C/T]AGTTTAGAGTTATGATATCGTAGCGACGAGGCAGGTCGTTACAAACAACGACTTCTTGAG	Y	C	0.436	0.33572	Y		0.011	0	0.0052356	0.279	0.096
BARC_1.01_Gm01_48844972_C_T	Gm01	48844972	C	T	ATATTAAGCTATAAAATAAGTTTGTGTAAAATAAATAAGCAAATCAAAATAGATTATAAG[C/T]TTTTCGAGTATCTTACTAAATGTGCCAAGTGTGTTTGACAAAATTAGTTGGGATTTATAA	Y	C	0.899	0.69223	Y		0	0		0.128	0.042
BARC_1.01_Gm01_48852025_T_C	Gm01	48852025	T	C	TCCTCGCTTTCATTCGACCAACCGCCACTTCCAGCTCAATCGTCCGTTGCCTCTATCACT[T/C]TGCACCATCTTGCTTGGCGACGATGCCATAAAGCATCATATTCATCTGTGCTTGGTTTGG	Y	B	0.842	0.69886	Y	CDS	0	0		0.445	0.148
BARC_1.01_Gm01_48855838_A_G	Gm01	48855838	A	G	AGTTAGCAACTGTGCACAAATTCTAATAGCCAATTCATATTCATCCTTCTGCACGTGTGG[A/G]ATATGACAGAGCATCAACATGTGTAGGCTGTTGCTACTTGCTAGCATACTAGTCAAAGTT	Y	C	1	0.77	Y		0	0		0.158	0.052
BARC_1.01_Gm01_48860794_C_T	Gm01	48860794	C	T	GCAAGGAATCCCAGGGAAACTCTACTGCAAGAATGGCTCTTAACACCGGAAGCTTTTTCA[C/T]CGTCCTCCCCATCCTTGATGGCAAGAATTGGGAAAGATGGTGCATCCAGATGAAGGCAAT	Y	A	0.7	0.7	Y		0.474	0.292	0.405405	0.054	0.3
BARC_1.01_Gm01_48870742_A_C	Gm01	48870742	A	C	TTTTTTCCTTAAATCTAAGAAATGCCTCTCTAGGACTCGTGGCTGCATCTTAAGCAAAGA[A/C]ATATAAGTGAAATAGACACAGAAAGTTATACATAGATCTAAAAAATACAACCATCAACAA	Y	C	0.558	0.42966	N	Intron
BARC_1.01_Gm01_48876857_A_G	Gm01	48876857	A	G	AACCAAACATGTACTTGGTGCATGATGAACTCCAACGGGCTCCTACAAACTCAGCACTAC[A/G]CATAGAAGGACGATTGGCCAACGTGACTCTGAGTGTGATGTAACCTCCTCAATGTCGAAC	Y	A	0.976	0.976	Y		0.478	0.271	0.388889	0.487	0.445
BARC_1.01_Gm01_48887056_T_C	Gm01	48887056	T	C	CATTATTGTCACTATCATCATCACTCTTTTCCATAGCCACAGTGGCCCCACCACCAACGC[T/C]ACCATCACCATCACCATTATCATCACCACCACCACCTACTGCCACAGCCACAGGGGCCCC	Y	B	0.949	0.78767	Y		0.396	0.302	0.448087	0.01	0.371
BARC_1.01_Gm01_48956498_G_T	Gm01	48956498	G	T	TGGTGTTAAGGCAGCGGAGTTTCTGCTTAAGGAGCGCCGAAAGGGATGAGGGTGAACAAA[G/T]GGGGGTGTTAGGGTTCGGTGGCAAGGCAACAATGAGTGAGAGGACCCACGAAGGCTACGA	Y	C	0.915	0.70455	Y		0	0		0.121	0.04
BARC_1.01_Gm01_48970260_G_A	Gm01	48970260	G	A	GTTTTGCTCGTTTGTGAAGCCTATTAAACTTGGAATCAAGTTCAAGGTACTTCTCTTCAC[G/A]CTCTTTTACTTCTTGGTCTAACTTCGTTTGAGCTACACAAAAAAACAATGCAATGCATTC	Y	C	0.841	0.64757	Y	CDS	0	0		0.11	0.036
BARC_1.01_Gm01_48997127_C_T	Gm01	48997127	C	T	CCTTCCCCGTCACTGGAATTCATGTTCCCGCGCGTGCGGCCATTTTAAAAACCCCCCCTT[C/T]TCTTTTCCTCACTCACTTTTTGTCTGCATCTCTTCTCCGCTTGTCCCTCTATCCATCACT	Y	A	1	1	Y	5UTR	0	0		0.187	0.271
BARC_1.01_Gm01_49007338_T_C	Gm01	49007338	T	C	ACCTCATCATTCTCAACCTTTCTCAAGCACTACTTGTTTTGAAGCTGAGACAATCCAGAG[T/C]GACTTAGTTGCGCTTTCTGAGTTGTACAACTGCATGGAGGAACTCTTCCATTCTCCGCAA	Y	C	0.9	0.693	Y	CDS	0.021	0	0.0104712	0.138	0.053
BARC_1.01_Gm01_49008598_C_T	Gm01	49008598	C	T	TTAATAAGTAATCTTTTTTTTACCGTTATTGAGTATTAGTTTCTTACTGTTTTTTTACTG[C/T]TATTAATTAGTAATCTTGAGGTTAGCTGTTACCTGCTAATTTAATTATGCAAAACTAACA	N	B	0.813	0.67479	Unknown
BARC_1.01_Gm01_49016620_A_G	Gm01	49016620	A	G	TGGTGAACATCATGGACGAGTCTACGGTGAACCGAAAAAGTTACGAAAAAGGAGTAATTT[A/G]TTTTATAATTTATTAAATGAAAATAAATTTTAAATTAATATTTAAATATGAATAATTTGT	Y	B	1	0.83	Y		0.404	0.156	0.376344	0	0.378
BARC_1.01_Gm01_49029066_T_G	Gm01	49029066	T	G	GACATCTCTGAACCAACAAGCAGCAACAATTATAAAGAGGGTAATGTGGAAGCCGAGGAG[T/G]CAAACATCAAACTAGTTGATGAGTAAGGACATCTACATGATTTTTAAATGAGTTGCTTAT	Y	A	1	1	Y		0.432	0.153	0.359788	0.438	0.387
BARC_1.01_Gm01_49065396_T_C	Gm01	49065396	T	C	TTTTAATTTGTATATTTTAATTTAGAAATTATAACAGGCTGAGCAACTACAAATATGCAG[T/C]CAGAAATTAGAGGTGAAGAGGAGTAATTCCTAAATTGTGCGGAATGCATGCATTGAATCA	Y	A	1	1	Y	Intron	0.335	0.406	0.465241	0.372	0.483
BARC_1.01_Gm01_49069824_C_A	Gm01	49069824	C	A	CTTTTGTGGGTTTCTCCAAGTTTTTGTTGCTTTCCTCTATTCGTCTTTTGCCCTTGAGCC[C/A]CCAGTTTTCTTCTCTCTAATTCTTCATCTCGTGTTACGTTTTCTTGCTCCCATTCATCAT	Y	B	1	0.83	N
BARC_1.01_Gm01_49072325_A_G	Gm01	49072325	A	G	TCCGTATGGATCCTGTTTTTGCTTGAGTGAAAGGCATTTATATCTTGCACCTCTCATTTC[A/G]CATCCAGTACTTCCTAAAAGACTCTAGCAGACAAAAATACTCTTTTACTCCAAAAAGACT	Y	A	0.812	0.812	Y		0.332	0.385	0.473404	0.495	0.483
BARC_1.01_Gm01_49081548_T_C	Gm01	49081548	T	C	TTTTTCCCATAAGGGTACCCCATGAAGAGACACCAACGACTGTGACTTGCAAATTTGTCT[T/C]TGTATTTTGGTTACATGCAAAACACAAGGACCCAAAGATACGTAGGTGAGTATAAGAGAG	Y	B	0.768	0.63744	Y		0.339	0.385	0.475936	0	0.483
BARC_1.01_Gm01_49083096_C_T	Gm01	49083096	C	T	GCCAAGGCCATGACTTCTGTTCTTTCTTCTTTGCTTCGTGTGATAGTCCACAATTTTTTT[C/T]CCATACTAGAATAAAGTAATCTTGTTTAAAGATGGCATAGGATCTGAGGCCAAAGTTGGA	Y	B	0.772	0.64076	Y		0.368	0.385	0.491979	0.01	0.345
BARC_1.01_Gm01_49089101_T_C	Gm01	49089101	T	C	ATTATTATCTAATACAATACAGAATTAAAAATTATAAACAGGAAAGAGGAAGCGACAGCA[T/C]GAGACAGGAAAGCATGAGAGAAACAAATATCTCAGTAATTGGAAATACAAGCTCCGCAAT	N	C	0.841	0.64757	Unknown	Intron
BARC_1.01_Gm01_49093392_A_G	Gm01	49093392	A	G	GTGAAAGACCTAGCGGGAAGGCGATTGAAGTGGAGCCAAAGCTGATCGTCGAAGCCGGGA[A/G]CATGCCCCTCCTCGCAATCCGATTCCTGAATTCGCCGAAGCACCTCATTGTACACCTCCA	Y	B	0.789	0.65487	Y	CDS	0.026	0	0.0104712	0.372	0.216
BARC_1.01_Gm01_49096346_C_T	Gm01	49096346	C	T	TTGTCGCTCAGTTTGTGAATAGTGAGATAGGACAAATTTAAACACTATAAATATAGTTTT[C/T]ACACATTTTTAATGTTATAATTTATATATTTATAAATATTTTCAAATAATGTTCTTATTA	Y	B	0.601	0.49883	Y		0.349	0.337	0.494681	0.172	0.399
BARC_1.01_Gm01_49097384_G_T	Gm01	49097384	G	T	TAAAACACGGTTTAAGATTAACTAGTGCAATGAGCTATTTTGAGGGTGTTGACGCAAATT[G/T]ATACAATTTTTTATAGGCAATTTTGATACGGGTTCAAAAGCAAAAAATTAATATGATTAT	N	B	0.935	0.77605	Unknown
BARC_1.01_Gm01_49101288_A_C	Gm01	49101288	A	C	TTTGCCGGAGATGTAAGGAAATAGAGAGAGAGGGGAGAAAGGAATGGGGTTGGGGTTGGG[A/C]ATGATCGTGATACTGGGAGGATGTGTTGCAGAAACCAGAAACATTAAATGAGGGAATCTC	N	B	0.9	0.747	Unknown
BARC_1.01_Gm01_49111556_C_T	Gm01	49111556	C	T	GTCGGTGTCGGAGACTGACACGCGTGTCAAACACCAAACACGACAAAGGGCTGAAGTGTC[C/T]GTGCTTCATAGCATACTATACCTGATATATATTTAATTAGCCAAGCTATTTTCTTCGCCA	Y	B	0.858	0.71214	Y		0.363	0.022	0.186813	0.226	0.204
BARC_1.01_Gm01_49116924_C_T	Gm01	49116924	C	T	ACAAGACCAACAAGTGACAACACAACATCAACAACTACTGAGATTGCTCAACAACATCAT[C/T]GGTGGAACAAATGTAACAAAGCCATCCCAATGAAGAAGAACTAGAGAACTTTTCTTTCCA	N	C	1	0.77	Unknown	Intron
BARC_1.01_Gm01_49121708_G_T	Gm01	49121708	G	T	TCTTATTCAACAAAACCTTCTCCTCCTTATTAAACAACTTCCGGCGACCTATTCACGCAG[G/T]CACGGAAGAATTAGAACAGCCATCCCAACACTTTAAAAGTCCATATACACGCAACAAGAC	Y	B	0.9	0.747	Y	Intron	0.37	0.307	0.468421	0.182	0.417
BARC_1.01_Gm01_49170722_T_G	Gm01	49170722	T	G	CACACACTTAGCACGAGATTTCATGCTAAGCGTGTCTTTGGACTTCTTCGTGGACTTTTT[T/G]TGCGCTAAGCGAGGATGTGCACAGCTTGTGCGATAAGCGAGTTGTTCCTTTCAACTTTTT	Y	B	0.949	0.78767	N
BARC_1.01_Gm01_49171971_G_T	Gm01	49171971	G	T	TTGGAGAAGAAGGCATGCTGCATGGTCCTGTCACTGCGGATTGTGGAGAGCGTGTTGCAC[G/T]AGCCGCGTTTGACGTTGAGGACAATTCGGTGGGGCTCTAGTGACATACTGAAGGCCGCTG	Y	C	0.915	0.70455	Y	CDS	0	0		0.323	0.08
BARC_1.01_Gm01_49196746_A_G	Gm01	49196746	A	G	ATATCCACGTATTCGTGTCTGTTGTGTCGGTGTTGGTGCTTCATAGGTCATACCACTTGC[A/G]GAGAAAATAGTGGCCAATGAAAGCCTCCAACCCCAAGCTTGAAAGCACGCTCTGACCAAA	Y	C	0.976	0.75152	Y		0.432	0.314	0.44086	0.031	0.306
BARC_1.01_Gm01_49215784_A_C	Gm01	49215784	A	C	TTGATAGTCTTGAGTAATGAGTCAGGAAAAGTCTCGATCAGATACATGCAGGTATCCCTG[A/C]GTAATCAAGCATGGGTCATGGAAAAAAGTAAGAGCTCAATCTTGTCAGATACATGCCTAA	Y	C	1	0.77	N
BARC_1.01_Gm01_49217495_T_G	Gm01	49217495	T	G	ATGCCACAGACATAGTACTGTCACTATATTCTACTAAAAAATTAACACATTATTCAACCA[T/G]GCACATTTTCGCCACGGGCTTTGTTATCAGGAATATGTTGAAACAATCACTATAATAATA	Y	B	1	0.83	Y	Intron	0.484	0.095	0.301075	0.464	0.362
BARC_1.01_Gm01_49221509_T_C	Gm01	49221509	T	C	GGGTTTGTTGGATGGATCTTCTGTGCCACAATCGCAGGTTTGGTTCTCTCGCCGTTACTC[T/C]GTTGTTTCAGTTAATAATTAATAATTCCTGCAATTTTAGTGTTCCAACCAGTGAAGCTAG	Y	B	0.732	0.60756	Y		0.389	0.037	0.208556	0.378	0.358
BARC_1.01_Gm01_49225801_C_T	Gm01	49225801	C	T	TCTATTTGGACCTGAAGTTGCATGGAATTATATTTGACTATTCCATAACGCCGCCGCCGC[C/T]TCATCTTCCCTTTCATACCCGGTGTTGATGTAGTTAGTTTATTATGACCTTTGGTGTTAC	Y	A	0.996	0.996	Y	3UTR	0.388	0.043	0.215054	0.362	0.266
BARC_1.01_Gm01_49235456_A_C	Gm01	49235456	A	C	ACTCTCAGCTTGAGCTCTCTCCCTCATCACCACCACTTCCGTTTCGAACACCCCTCCTCA[A/C]TCCCTCCTCCACCCTCCAACAAAAGATTTGCTCAACCTGCTGACCATTGCAGCACCATAG	N	B	0.949	0.78767	Unknown	CDS
BARC_1.01_Gm01_49259333_G_A	Gm01	49259333	G	A	CTCATGTTAACTTTGACTAAAGTATCTTCACATCAATTTTTGTCGGAACATCTTTACCTC[G/A]ATATCAACTATAAAATATTCCCTTAATTTATAAGAAAGAATATAAAAAAAATATTTCAGA	Y	A	0.935	0.935	Y		0.307	0.274	0.284153	0.018	0.204
BARC_1.01_Gm01_49261977_G_A	Gm01	49261977	G	A	AATGTTGATGTTGATGTTAATGATGTCATCGTGATGGGTGTAGGCTATGTATGTACATGG[G/A]GTGCAGTGACTTGTTGGATATACCTAGAGAGGGAAGGTGATTGGTTTCAAAATTCCAAGC	Y	C	0.7	0.539	Y		0.306	0.292	0.293478	0	0.203
BARC_1.01_Gm01_49275790_C_T	Gm01	49275790	C	T	ATCATCCAATGTGTATTCACGTTGATCCATTTCAATAACTTCAAGTCTCTCCTGAATATT[C/T]CAGAGAATGAGAGAAGCAATAGATTGTTAACCATATATTCGGACCAAATTTAATGACACA	Y	B	0.935	0.77605	Y	Intron	0.333	0.339	0.497326	0.474	0.497
BARC_1.01_Gm01_49278808_G_A	Gm01	49278808	G	A	GGGAGTTAATATTGAATCCTTAATCATTCATGTTAATTTGCATTCACATCAAACCATAAA[G/A]CATTCTTATTTCACTAATTGATGTGTGATTATTTCAGATTAATCAAACATTTTAGATTTA	Y	D	0.765	0.51255	Y		0.495	0.274	0.387978	0.219	0.481
BARC_1.01_Gm01_49281276_T_G	Gm01	49281276	T	G	TTTAGTAATAACTCTTTATTAGTACTTCATGACCATAATCAGTTTCAGATAAGACAAACT[T/G]AGATGATGCCTGGTTTTCTGGTCACGGGAGAAAAGCAACTTCAGTTCGGGGAAGGGATTC	Y	A	0.878	0.878	Y		0.316	0.339	0.489362	0.016	0.34
BARC_1.01_Gm01_49288739_A_G	Gm01	49288739	A	G	ACTAAGCTTTTCCAAGAGTGAGAGCTTGTTGTTAAAATACGCGGGAGTGAAGTGTGGTGG[A/G]GGGACGATGGCGTTGTTGTTGTGGTGTTTACGTCGAAGGACATAAATGGGAGTGAGGCTG	Y	A	0.996	0.996	Y		0.342	0.292	0.311828	0.083	0.243
BARC_1.01_Gm01_49289896_G_T	Gm01	49289896	G	T	AACAGGGAGAGGTTAAGAGGAGGCATATTCTCCCTTCTCCCAAGCGGAGACCAGCACGAA[G/T]AACTATACTAGCTCGGTCGGACCGGACCGGTAGTTAAGAGAGGGATCGAATTCGAAGCGA	N	C	0.915	0.70455	Unknown	5UTR
BARC_1.01_Gm01_49294943_G_A	Gm01	49294943	G	A	TTTTATAATATAATGTTACATATGTTCTTATAAATGTCAGTTAAAATAATCCTTATTTTT[G/A]TGATCCATTCTCCTTTCATTATACTTATTTTTTCCCCTTTCCCCTTAGCTGGATGAAGAT	Y	C	0.812	0.62524	Y	Intron	0.353	0.289	0.317204	0.086	0.246
BARC_1.01_Gm01_49310636_C_T	Gm01	49310636	C	T	TGATTTGAGTCTAATTTATTTATGTGACAATAGTCTTTTTATAATCCGACCTATATAAAA[C/T]TATTATGTAACATATAAACATATTTAAGGATATACTTTGTGATAATTTAACACCAAGATA	Y	C	0.425	0.32725	Y		0.172	0.048	0.107527	0	0.111
BARC_1.01_Gm01_49315885_A_G	Gm01	49315885	A	G	ACCACCATTTTCGACGTCGTGCAGAACCTTCTCGTCGTCGTCGGTGCAATTTCAGTCTCA[A/G]GCGTCGAGCAGAACCGCTTCTTCTCCCTTAAATTGTTGGATCTAGAACATTAATCTAGCA	Y	B	1	0.83	Y		0.297	0.344	0.47619	0.065	0.345
BARC_1.01_Gm01_49320983_T_C	Gm01	49320983	T	C	GGTCTCCTTATTCTGAACCCATTGCCATAGACCACTGTGCCCGCTGCCGAAGGCGAATTC[T/C]GGCCGCTCTCTTTTTCCTTTTTGTTCTCTCCAAGTACAACAACAATCACTCTTCCTTCAA	Y	D	0.591	0.39597	Y		0.24	0.349	0.440678	0.371	0.482
BARC_1.01_Gm01_49322760_C_A	Gm01	49322760	C	A	CCGGCAGTCCTCGTACCACATTAAATTCCATTCCGCACAAATAATTGCAACAAAACAATT[C/A]TTGCAGGAAACGTGACAGGAGCAGTGATTGGTTTTATTGGTTGAGCGCATTGACAAGACA	Y	B	0.9	0.747	Y		0.307	0.333	0.486486	0.234	0.409
BARC_1.01_Gm01_49323877_G_T	Gm01	49323877	G	T	TGTGGGGTTGTTTGATGGTATGGTATTGAGGTACTCTAGCTGCTGAACTATGTGCTTCTG[G/T]ACTTGATGGCATTCGTACATGCTTCTCCACATGCACATTAATCTGCCAACATAACAAGAA	Y	A	0.842	0.842	Y	CDS	0.365	0.333	0.344086	0.5	0.404
BARC_1.01_Gm01_49332360_A_C	Gm01	49332360	A	C	ATTTCAACTAATGACCTATCATCATGAAAATGAAAAATAAAATTTAGGAATAGTCCAGGA[A/C]AATAAAAAAGAAAATAAGAAAAACTAAAAAATGATATAAAAATAAAAATTACAAGTCAGA	Y	A	0.603	0.603	Y		0.484	0.292	0.40107	0.226	0.481
BARC_1.01_Gm01_49338456_C_T	Gm01	49338456	C	T	AAAGGTACCAGATGAGGAGCAAAATCAGCCCAAGGGACCATATGAGAAGCTAAATCAGCA[C/T]AGGGGACTTATAGGAATCGGTATAGTATCCGTGGTGACCGTGATATTAGGTTACTTACTC	Y	B	1	0.83	Y	CDS	0.396	0.292	0.33871	0.384	0.362
BARC_1.01_Gm01_49341786_G_T	Gm01	49341786	G	T	CAAACATTCATTTTCATTTGTTAATTTAACTAGGCAGTTATTCATATGGTATGGTGATGA[G/T]GCATGAGATTTGGCTAGCTTCTCAGCTGGTTTATCTCCATTAGCACTAACAGGATTAGAA	Y	C	0.9	0.693	Y	CDS	0.389	0.292	0.335135	0.153	0.284
BARC_1.01_Gm01_49348802_C_T	Gm01	49348802	C	T	GTAGAAAGAGGGCTGATTTTATTCCTTATCCATGACGCTTATGGCTTTCATCAGATGCCA[C/T]ATTTGCCACCCATCTTCCCTTGGGGCGTCATTTGAACCACAACTACATGCAAAAAGGGGA	Y	B	0.878	0.72874	Y		0.41	0.28	0.342391	0.166	0.293
BARC_1.01_Gm01_49362852_T_G	Gm01	49362852	T	G	GGATCCGGAGGAGGGCCTCCTCGGTGGCCTCCAGTGGCGCGGAGGGGGATCCGGCGGCGG[T/G]GGCATCCTCAGGGAATAGGTTTTGGACGAGGTCGTTGTAGTCAACGGAAGGGTAGAGGCT	Y	B	0.854	0.70882	N	CDS
BARC_1.01_Gm01_49367379_C_A	Gm01	49367379	C	A	ACTCATCATATCTACACGAATATATTTCTCTCTTCTATCTCTATACCTCTCTAGGTATAT[C/A]GTAGCACATTGGTGTTCATGTAACATTTTCCTTCAAGAACAAATAGCCACAACAGCAGAG	Y	A	0.889	0.889	Y	Intron	0.421	0.292	0.433155	0.372	0.417
BARC_1.01_Gm01_49373939_A_G	Gm01	49373939	A	G	TGGCTTCGTCATGCATGCACCAACCACCATTTCTGCACCACACAAACACATCACACTCAC[A/G]TCCTTAACTTTATAATACTACATTTAGTTGAATGACTAAGATGCATAATTCTCATAATTA	N	A	0.996	0.996	Unknown	Intron
BARC_1.01_Gm01_49383679_A_G	Gm01	49383679	A	G	AAGTCTTCTCTAATTCTATCTAATTTTCCAAAACTAAATATATTAATGAAATGATAACAA[A/G]TATAAAATAGAGAGGGGGGAAATGTAAAAGCAGAATATTGCACGGTTTGGCTAAACCTAA	N	B	0.988	0.82004	Unknown	Intron
BARC_1.01_Gm01_49384575_T_G	Gm01	49384575	T	G	TCATACGGATTGACAATCTGTATGAACCTTATGGATTGTCAATTTGTATGATCATACGGA[T/G]AATGCAATAAAAAAACAAACACATACAAGGTACTCATGGCGAGGAGGCGGGATGGGATAG	Y	B	0.9	0.747	Y		0.473	0.274	0.396739	0.161	0.456
BARC_1.01_Gm01_49385769_G_A	Gm01	49385769	G	A	TTATTATTGAACATCACCACTTGTCCACATGTCGTGCTATTCCTGATCGGGACCATAACT[G/A]TCGTGATGATCCTAGACCATATAATAATTTATTCCATTTAATGACTTTTGTCCACATTGC	Y	B	0.996	0.82668	Y		0.404	0.284	0.437838	0.021	0.384
BARC_1.01_Gm01_49391783_T_C	Gm01	49391783	T	C	AAAACTATGCCCTTCTATGGGACTTATAATGAAAGGTTTCCATCAGACAAGAACAGACAA[T/C]CCTATTGTGTGTGTTGTCTCTTCAATGCATAACATAATGTGGAGATAGAGTTGGTGGTGG	Y	C	0.889	0.68453	Y		0.474	0.297	0.382979	0.346	0.484
BARC_1.01_Gm01_49394407_T_C	Gm01	49394407	T	C	CAGAAAAAGAAGAAACACCGACCAACGAGGTAACATGGCCACAGTAACAGCCATATGGTG[T/C]GGTGTGGTAAGCGATCTAAGCCTGAATGCAAATGGGTTCTTCAATTCACGATAGAAGCTG	Y	C	0.9	0.693	Y	5UTR	0.427	0.284	0.354497	0.245	0.321
BARC_1.01_Gm01_49403702_A_G	Gm01	49403702	A	G	GTCGCCGCCCTCCACCCTCAGCTCCGACGGGCACCGCCGGTTGAGATCCTCACCGCACCC[A/G]GTGGCGCCGCAGGACCCCGAGCCGCCTCTGGCCACCACCATCATGGGCAGATTGTAGCCG	Y	B	0.444	0.36852	Y	CDS	0.347	0.286	0.468085	0.073	0.381
BARC_1.01_Gm01_49406377_C_T	Gm01	49406377	C	T	AACCAATGCTATGGACAATCTTACATATAGTCTATTATGAACCAAACCACTTTTATGCAC[C/T]GTTAGATTAATCACATCTACATACAGATTTAGTGCATCATATGTATCAAATCACCACCCT	Y	A	0.899	0.899	Y		0.385	0.286	0.441341	0.063	0.392
BARC_1.01_Gm01_49412063_T_G	Gm01	49412063	T	G	TGATATATATCGTGGATGTGATAAGAGAGAGATTGACATATTGTGGTTGTGAGAAACTTC[T/G]GACTCAACTAAAAATAGCAAGTAGTACATAAAATTGGATATATTATTCTTCTCGAGTTGG	Y	A	0.9	0.9	Y		0.347	0.286	0.468085	0.232	0.434
BARC_1.01_Gm01_49414776_T_G	Gm01	49414776	T	G	ACTCAAACATTCACTAAGTCGTATGTGTAATGCCGATAACAGATACTTGATAGGCGATTC[T/G]ATGCACTTGAATGTGAATGTCTTAGATTATTCGTAAATAAAGTAAATGGTGAAATTAGTC	Y	A	1	1	Y		0.344	0.277	0.468085	0.06	0.375
BARC_1.01_Gm01_49415835_T_C	Gm01	49415835	T	C	ATAACAACCTAAGAAGCACAGTTGCGACCACACAGGGGCGTGTCCTGTGTCGGAAGCACG[T/C]TGGACGTGGGCGTAGACACGACTCGCGGTGTCAGTTGCATCCTTCATCGTCGGACATGGT	Y	B	0.834	0.69222	Y		0.358	0.047	0.343915	0.472	0.408
BARC_1.01_Gm01_49416730_T_C	Gm01	49416730	T	C	TATTGTAGATATGAGTAGTGGTTTAGAAGCTATGGAGCAAGAGGATCAAATCAAACTCTT[T/C]TAGAGATATGTCACGAAGTTAAGAAAGACTCTTGCTGGGGGGAAATGCCATGATCAAATG	Y	C	0.668	0.51436	Y		0.344	0.063	0.357895	0.068	0.451
BARC_1.01_Gm01_49422361_T_C	Gm01	49422361	T	C	GCCATCGTCATAAGCGTAACTATAAGCGCGTGGGCACGCGCTCTTAAAGAACTGCGAGTA[T/C]GAACTGGGTTTGCATGTGTCAGGCGTCGCGTAAGCGCCACTACAGCAGTACTGTGGATCG	N	B	0.781	0.64823	Unknown	CDS
BARC_1.01_Gm01_49423295_G_T	Gm01	49423295	G	T	GAATGGGTTGTGTTGGGAGGGAAATCAATATATATAGAGAGGATTTGATGTGGCCCATAG[G/T]GTTGAGGGAGGTTATGGGTGTGGGGCCCAGTGGAGCAGTGCACATGCATGCATTAAGCCG	Y	B	1	0.83	N
BARC_1.01_Gm01_49426760_A_G	Gm01	49426760	A	G	TATATACATGATTGACTAAGGGGGAATTGCACTTTTCCAAGGGCCACGTCGGACCATACT[A/G]ACTAACCGCTTGAGGGGACAAGTCATCTATGTCGGCTAATTGCTCAAATATCATGGGGAG	Y	B	1	0.83	Y		0.362	0.047	0.336898	0.061	0.465
BARC_1.01_Gm01_49428336_C_A	Gm01	49428336	C	A	TTCTGTTCTCGCTAAGCGAGTTGGCTTCCTCGCTAAGCGGATTAGCCTTGTTTAGCTAAT[C/A]TGGCTCGCTAAGCGAGCTTTTCAGGAACATTTCCAAATCCTCTATTCTTCAACCTAAAAA	Y	C	0.9	0.693	Y					0.101	0.101
BARC_1.01_Gm01_49429992_A_C	Gm01	49429992	A	C	TTAAATTTAGTTAAATATTTTTCTTGTTATGATTTATAATTATCGTATGAAAAAAAGACA[A/C]ATTAACTCCAGCTTGCTGATATTGCAAGAGACTCTCTTCCCCGCCAGATTCGTATAGTTT	Y	A	0.9	0.9	Y		0.344	0.063	0.357895	0.042	0.444
BARC_1.01_Gm01_49439136_A_G	Gm01	49439136	A	G	CACCGCCGCTTCCCCTGGATATTTCTTGATAACTGCATCAAAATTAAATTAAGCACCCAA[A/G]ATTTAAAAACTGTTACTATAAATTAATAAAATTAATTACCTGGAAGAGGGTGTGGGTGGG	Y	B	0.935	0.77605	Y		0.34	0.063	0.358289	0.052	0.444
BARC_1.01_Gm01_49440470_C_T	Gm01	49440470	C	T	TTTTATTTTTTATAATTTTGGATTAGGTTCTTAGGTTTGCCAGCAACTTTCATGTTGTTG[C/T]CTACTGTTTCGATGTTGTTGACCTTTGACGTGGATCAAACAATCTTCCCACATTCCTTAG	Y	D	1	0.67	Y		0.461	0.038	0.263473	0	0.269
BARC_1.01_Gm01_49445352_A_G	Gm01	49445352	A	G	TTTACATTTTTTCCAAAAAAAAATGTATATTGGTATAACAAGGGTTATTACGCAGCCGCC[A/G]GCAAGGCGCAAGCTTGGCATTAGGGGCTCCAAATCTCCAATCTTACGTTCAAAAGATAAA	Y	C	0.965	0.74305	Y		0.344	0.064	0.361702	0	0.366
BARC_1.01_Gm01_49446885_G_A	Gm01	49446885	G	A	GTGTGGATGTTGTCGGTCTTTGACGCTAAGGGGATTCTTCCTCATTACCCTAAATTGTCT[G/A]CCTAAGGCTCTTTATGAAACTCTACCTACAATCCGACACAATTCTTTGATTCTAACTATA	Y	C	0.889	0.68453	Y		0.426	0.047	0.232804	0.188	0.222
BARC_1.01_Gm01_49453902_A_G	Gm01	49453902	A	G	AATATATACATTGGAATATTTTTATATTTTAAAGCAATGGAGTACGTATTTTGTTAGCTG[A/G]CGTGGTAAAGTTGGAAGTTTTTATGATCACAGATTGGAAGAAAACAAGCTTTTCCTCTTT	N	C	0.868	0.66836	Unknown
BARC_1.01_Gm01_49457066_G_A	Gm01	49457066	G	A	TAGCGGTCGCTGCTGCTGGCCAGCGAGACCAGCTGCGCGGCCGCGTCGGACCGGTCCTCC[G/A]CCGAGCCCGTGTGGAGGACGGCGATCTGCTCCCAGATGAGGCAGAGGATCGGGTCGTTCG	N	B	0.443	0.36769	Unknown	CDS
BARC_1.01_Gm01_49486238_G_A	Gm01	49486238	G	A	ATGTGAAGGCAGAGTAAGTTCTAGTACAAGGAAAAATATATTGCTAAGACAAAAATATTT[G/A]GAGTCATTAGGGATCATGGTTCTGAAATATGATTCACCATTGACACACTGAAGAGCCACT	Y	C	1	0.77	Y	Intron	0.353	0.047	0.345745	0.289	0.33
BARC_1.01_Gm01_49498159_A_C	Gm01	49498159	A	C	TTGAGATTTTATCCAATCCCTTTCATTTTTTATGCGCGAAGACTTTGGTCAACCCTTATC[A/C]CGTATTTTGGATTCCTCCGGAACAATAATAGGTCCATTCTTTTCAAGAATGGTTTTCTCA	Y	B	1	0.83	Y		0.353	0.057	0.349206	0.176	0.296
BARC_1.01_Gm01_49499286_T_C	Gm01	49499286	T	C	ATTTCCTATACAAGAATGTGCCATCTATTTGGTTTATTGGTTTGCACAAGTTAAACGTGT[T/C]AACAACATGTTTAAATGTCCAGAAAACATGTTTAAATTGTTGGAATTGTGTGTAAAATGC	Y	D	0.868	0.58156	Y		0.328	0.063	0.365079	0.479	0.406
BARC_1.01_Gm01_49502342_A_G	Gm01	49502342	A	G	GCGAGAGTGCACGTTGGGCCTGTCTAGTACGCTAAGCGGACTTTCCAATTTTTCTTTAAG[A/G]TTTTTTCTTCCAATTTTAGCATCAATTTTTCCTCCAAAGCACTTGAAATCTTCTTCTTTT	N	C	0.683	0.52591	Unknown
BARC_1.01_Gm01_49503516_G_T	Gm01	49503516	G	T	TTAAAGAAAAACATGTCCACAAATAACACAATTTAACTGTGTTGAGACAAACACAATGTC[G/T]GGTCCTTAATTATAACATTATTTTGAAAAATTTGTTTACCATTTTTATAAAATCCTTTTC	Y	A	0.935	0.935	Y		0.339	0.053	0.351351	0.268	0.486
BARC_1.01_Gm01_49507354_A_C	Gm01	49507354	A	C	CAATATTTTATGAATTATTTTGGGAAGCATAACGAAGCAAGGGCTAGGCTATAAGGTTAC[A/C]CCAAACAGGATAACGCCTTCGGTTACAATATGTTTGACTGGCGTCTTCTTCATCCATTAT	Y	D	1	0.67	Y		0.349	0.052	0.345946	0.397	0.372
BARC_1.01_Gm01_49534591_A_C	Gm01	49534591	A	C	AAAAGAAACAATGTCAGCATCCAACCTTACTAGGTATATAATTAAAGCTCAGCAGTTCAA[A/C]ACTCACCGCCTGAAATACTTTGGTTCACTTAATCGAGCAAGAAAATAATCAACAGCAAGG	Y	A	0.889	0.889	Y	Intron	0.26	0.01	0.131579	0.197	0.157
BARC_1.01_Gm01_49541169_A_G	Gm01	49541169	A	G	AATCCTCCTCCTTCCTTCTCTTCATCTTCTGCTTTTGTGCACTCAATCACTGAGAAGCTC[A/G]CTGATTCGAACTTCCTGCAGTGGAGGCAGCAAGTAGAACCAGTGATCAAAGTGCATCAAT	Y	A	0.768	0.768	Y	Intron	0.394	0.047	0.216931	0.011	0.15
BARC_1.01_Gm01_49556214_A_C	Gm01	49556214	A	C	TTTGAATCCCGGACATTTGTCCTCTATGCTTCTAGCTGATGAGGTTCTTAAGTATGTACT[A/C]TTTATTTTGCCTCTTAATCCTCATAATGGCTAGGATAAACACTAGCAACTTTATGTTTTT	Y	B	1	0.83	Y		0.346	0.063	0.352941	0.224	0.496
BARC_1.01_Gm01_49561210_G_T	Gm01	49561210	G	T	TCCCTAAATGTTACTAAAATACATCAACTGAGGGACTAAAGTGATGCATATTCATTACTT[G/T]AAGGATTACTTAAAAATAGTTTTATTACTTTAAGGATTACTTAGAAGAGAAAGTAGTAAT	Y	C	0.637	0.49049	N	Intron
BARC_1.01_Gm01_49566893_G_T	Gm01	49566893	G	T	AGTACCTCTTCTCTCACCCCTTTTTACTTAAAATTAACTAAAGCTCGCATTTAAAACTAC[G/T]GCCAGTTCAGCATAGTTTGGGAGCAATACAAGCACCACCCACGATCAAAGCATCACATCG	Y	B	0.878	0.72874	Y	Intron	0.335	0.063	0.358289	0.3	0.48
BARC_1.01_Gm01_49569356_C_T	Gm01	49569356	C	T	TCCCTTACCTACTCCCTCTGATCCACGTTTCTTGTTATGTTATAGTCTAGGCCTCATGGT[C/T]GTGCAAGCCTCTGATCTGGTCATGGGGTCATTGTCGACCACCGTGTCTCTCGGCCCGATT	Y	C	1	0.77	Y		0.263	0.01	0.132275	0.229	0.169
BARC_1.01_Gm01_49570966_T_C	Gm01	49570966	T	C	CCTCCTTTTTTTCTTTCCCCCACCCTCACCTCCTCTGCCCCTCTCTTCTTCCCCTCCTCT[T/C]AGACAACATGTAAAAGCTACCAAACATGCAAAATCTCTGGCTTCGAGTCCAACCATTAGA	Y	B	1	0.83	Y		0.335	0.053	0.354839	0.282	0.484
BARC_1.01_Gm01_49580206_T_C	Gm01	49580206	T	C	ATGTAAGGTATAGTTGTAGTTGCCAATATAGCATTCATTCAATCATGTTTTCCCTTAAAA[T/C]GCTAGTTTTCTTTTTTAAAAAAATCAGCTGCTTGAAAATGATTGTAGATTTTTTTTTATA	Y	B	0.772	0.64076	Y		0.339	0.063	0.359788	0.455	0.43
BARC_1.01_Gm01_49602845_C_T	Gm01	49602845	C	T	GTAAACATTCACTGTTTGTGCGACCTTAGCGCCTGCCCTATTTTGTCTTCTTACAAAACT[C/T]TTGGAGACAAAGTAACATGGCTTCACATGTTTATCATTTGATAGGGTCACCATTAATCTA	Y	C	0.988	0.76076	Y		0.271	0.053	0.162304	0.375	0.233
BARC_1.01_Gm01_49605797_A_C	Gm01	49605797	A	C	GAAACCTTGAGTATTCACATATGCTTTTGTTATCCCCAATAATAGAACTCGATAGCAAAT[A/C]GCCTCTTCCAAGGAACGCTCGTTTGGCTCGCAATAATTCAATTAGTTCATCGGGCAAAAA	Y	D	1	0.67	N
BARC_1.01_Gm01_49619951_C_T	Gm01	49619951	C	T	AATCCAGACATATGTGCGTATGATTCCATTGTTATTTGAACATAGTTCTTATTTTTGCTG[C/T]TGTCTTGCTGAAAAAGAGAAGAACGAGGCTAGTGAGAAATTTAGCAAGGGACTTCATGTA	Y	B	0.9	0.747	Y	CDS	0.463	0.043	0.28877	0.318	0.428
BARC_1.01_Gm01_49622494_T_C	Gm01	49622494	T	C	TATCTATCATCATAAGCAATCATATTTGAGTCAAGATTACTATAAATAACAAAACTTTTT[T/C]TATAAATATTTTAAACTAATTGCATATTCAAGATTTAAATTTGAAACATCTCGTCACATT	Y	D	0.53	0.3551	Y					0.053	0.053
BARC_1.01_Gm01_49626421_G_A	Gm01	49626421	G	A	TTGCTGATTTTTACTAGTTTGAAAGTGGAATGTACGAATACGGTTTCTCTCGGGTTTGCA[G/A]CCGCAGCGGGCCATACTTTTGAGTTTAATTTAGGCATGTTTACTAGTGTTCAAGTGCAGT	Y	B	1	0.83	Y		0.452	0.057	0.297872	0.208	0.271
BARC_1.01_Gm01_49629261_T_G	Gm01	49629261	T	G	CTCTCCACAACAAGGGTTAAAGAGAGCAGCACCATTGGCTTCTGTTTCCTCCAGTGAATT[T/G]AAAACAGTGGCAGTGCCTTCTGTTTCTGCAAACATGCATTCAGTTGCAAAACAGATGAAG	Y	C	0.9	0.693	Y	CDS	0.295	0.095	0.4	0.388	0.476
BARC_1.01_Gm01_49635005_G_A	Gm01	49635005	G	A	CCAGCTAGACGACGACGGTGACGACAGAGGGACGGCAGACGGTGAGAGCCACGACAGACG[G/A]CAAAAGGGACGATAGAGGGCCAGAGGCACGACGAAGGACAAGAGAAAATTGATGCTTTTC	Y	A	0.976	0.976	Y		0.473	0.063	0.28877	0.145	0.445
BARC_1.01_Gm01_49637775_A_G	Gm01	49637775	A	G	ATAAATTGAGAAGCAAAAGCGAAAGGGTCTGTGTCTTCACTCATTCTTCTATTCTATTCC[A/G]TCATCAATGGAGAACACCGAGGGATCCGGATCTGCGACGAACGGGGTGCTGGCTCCGCCG	Y	B	1	0.83	Y	5UTR	0.2	0.052	0.117647	0.328	0.195
BARC_1.01_Gm01_49638966_C_T	Gm01	49638966	C	T	AGATAAATGTTTTAATTGAGGATGGAGGAGGGGGGTTTTTCTGTTTTGATCTTATAATGC[C/T]GCTGTTCTTTTAAATCATTCTTCATAGTTGACACAGTTTAATTTATGAGTAATTTATTTT	N	A	0.988	0.988	Unknown	3UTR
BARC_1.01_Gm01_49643187_C_A	Gm01	49643187	C	A	TATTATAGCTGTCATAGGGTCGATTATATGGATCACACAATATGGCGAAACCATTTGGCA[C/A]GGATAAAAATCAAAGTTTCAGAAATATTGTTCAGCCTACCACAGTCATTTTAGGAAAAAC	Y	C	1	0.77	Y	Intron	0.484	0.057	0.263441	0	0.276
BARC_1.01_Gm01_49646744_C_T	Gm01	49646744	C	T	AGTGACGAAGGCCAACGCTGAGAAAAAGGAATCGCGTCCAAAACGAAGCAAAACCGCAAC[C/T]GCCGCTGCTCCGAAGAAAACCGAGGCGGTTAAAAGGGCAGCGAAGAAGGTAGGGCCGAAG	Y	B	0.878	0.72874	Y		0.146	0.043	0.0947368	0.158	0.116
BARC_1.01_Gm01_49656749_G_A	Gm01	49656749	G	A	GAAGAGAAGACAAATTGAAGGAGATGAAGAAGCTAGGAAGCTAGCTTGGTAGAAGAAAAC[G/A]AGATGATGATGGAGAGAGAGGGATAAGTAAGAAAAATTCCGTTAGGACTGAGTGAGGGAT	N	B	0.9	0.747	Unknown	5UTR
BARC_1.01_Gm01_49660240_T_C	Gm01	49660240	T	C	AAAATTAATGCAAAAACTTGAAGAAAAAGCCTTGAGGGAAAAGTTAAGGAAGGGACAGCT[T/C]GCTTAGCGCACAAACCAGGCTTAGTGTACACCCTTGCTTAGCGGTCAAGCTCAGGCTTAG	N	B	0.679	0.56357	Unknown
BARC_1.01_Gm01_49661515_C_A	Gm01	49661515	C	A	ACTATGTCTGGGCAGAAAAACAAAGCACCGTAGTGTAAGGACCTTATTGTCCAAGGTTAC[C/A]GTCATTAAGTAAGCTCGATAACTATTCACAAAGTACAATTGGATTTTCAATTTCATTTCT	Y	B	1	0.83	Y		0.365	0.095	0.362162	0.197	0.495
BARC_1.01_Gm01_49678791_T_C	Gm01	49678791	T	C	ACCTCAATTGTTTTTGGTGTACTGAGCCACAAATTCTTGGCAATTGCTTCTTGCACCCCA[T/C]TAAAAACATGAATGGACAAATATGTCCATCCCTTCCCTTTCCTCCTCCTCCAAGCCAACA	Y	C	0.9	0.693	Y		0.358	0.333	0.486339	0.489	0.495
BARC_1.01_Gm01_49687691_C_T	Gm01	49687691	C	T	GTAATGCAGCAGAAAAACCCACGTGGGGCACCAAGGGACAATACTGATTACTGAATACTA[C/T]TAGTACATGTCTTTTCAAGCTGCATGAACAAACAACGATGCCCTACCCTTGGGAACAGCG	Y	A	0.9	0.9	Y		0.353	0.339	0.491892	0.155	0.396
BARC_1.01_Gm01_49691804_T_G	Gm01	49691804	T	G	ATATGAAAGAAGAGTGCGCTGATGTGTGCGTATTTTCCAGATTCGGCAGAGCAACACTCC[T/G]TTCCTAAGCTAATGTGCACTACTCTCTAATTTGTTAGTATTTCTCTGTCTGTCTGTCTCG	Y	A	0.935	0.935	Y		0.229	0.284	0.248649	0.172	0.456
BARC_1.01_Gm01_49705078_T_G	Gm01	49705078	T	G	TTCCAAAAACAACTTTGGTATTCAGTTAATTATCACTGCTTGTGTTGCATTGTTGAGATG[T/G]TACGGAACACAAGGAACACTAGAGGTTTCAGCCTCCATTCCTCCAATCATTGTCTGCCGC	Y	B	0.9	0.747	Y		0.37	0.339	0.483871	0.032	0.361
BARC_1.01_Gm01_49712406_C_T	Gm01	49712406	C	T	AAAACACATTGTCTTCAAAGTGATGAGTCCTTCAAATGAGTCTGATCCTCCCACAAAGTG[C/T]CATCAGCTTGTAGTCATGTCCACTACACGAGGGCCACTAAACTTGGACCATGCTCTGAGT	N	A	0.976	0.976	Unknown
BARC_1.01_Gm01_49714154_T_C	Gm01	49714154	T	C	TGTATTTTAGGCTCACAAATTAATAGTCCAGGATTTTAAATATTAAATTAAAAAAGCCTT[T/C]AACATGTGTTGAGACCATGAATGAGACAACACATTTTCCGCCCCATTGCTTCTTTAGACC	Y	A	0.9	0.9	Y		0.431	0.063	0.240642	0.384	0.293
BARC_1.01_Gm01_49716929_G_T	Gm01	49716929	G	T	AGGCAATTAAATGTAATTTATGCTCTTCAATCGTGTTAAATAATATATACTAGCTTATCA[G/T]TATTAGTAATTCTATTAAAAATAGTTAAAAGATATCAAACATTCAAAACTAGTCTAGTAG	Y	D	0.714	0.47838	Y		0.223	0.339	0.44385	0	0.298
BARC_1.01_Gm01_49726502_A_G	Gm01	49726502	A	G	TACGCAGTTTCCTCTTTCTGTCCTTGTAGTGTTCTTATGATGCTTATTGCTTATGTGTTT[A/G]CTCTTTCAATCTGGATGTAGCTTTCTTCTATTGCGAGACAGATGGAAGTTCCCTTTGTTT	Y	C	0.868	0.66836	Y	Intron	0.406	0.053	0.224599	0.368	0.28
BARC_1.01_Gm01_49730596_C_A	Gm01	49730596	C	A	TCAACGATGTAGAGAAATCAAATCTAATAATGAAAAAGAGAAATATTAAAAAAAGCAATA[C/A]TGCATCTCTCGCGGTCTCACTTACTAGAAATTCCGGTGGAGGGGAACCACACAAGGCAAA	N	C	0.915	0.70455	Unknown
BARC_1.01_Gm01_49746465_A_G	Gm01	49746465	A	G	GCAGTAGGAGTATCCTCTGGTGTCTCCTCTGGTATGGCCTCGGGTGTCACCTCTGACTCT[A/G]GCTGCGACTCCTGGGCTGTAGGAGCCTCACCTGCCCCCAAAGGAGAAAGATGGACTCTTA	Y	C	0.651	0.50127	Y		0.383	0.255	0.315217	0.36	0.336
BARC_1.01_Gm01_49770288_T_C	Gm01	49770288	T	C	CCGGTAGTTGCACGAGTAGGGTCAGGAAACTCGGAATCAAGTTGCTTGTGATAGATTAAG[T/C]TGGCTCCAACGTTGTAAGTATTAGTAGGCCATTTCCGAATTATGAAGGAGGGAATTGACA	Y	A	1	1	Y		0.239	0.284	0.478261	0.121	0.364
BARC_1.01_Gm01_49788599_C_T	Gm01	49788599	C	T	AAAGACATTCTTAGTGGTGACTCGATCATCGTTAACAGGTAATTTTGGCTTATAGATATA[C/T]ATTGTTTCGAATCAGCCTCACACATAAGAATCCAGTATTGAACCAGTCTAATTTACGAAA	Y	A	0.988	0.988	Y		0.168	0.24	0.197861	0.103	0.174
BARC_1.01_Gm01_49806920_A_G	Gm01	49806920	A	G	TGAAAAAATCAAACACAAACCTGAAATTTCGAGCGAGGATTCCCATTTGCGTTTTGCGGG[A/G]GGACTAGGACGACTCGTTCCGTAAGTAACTATCCGCCACTATGTGCTACCAAATTTATAC	Y	B	1	0.83	Y		0.17	0.242	0.2	0.01	0.144
BARC_1.01_Gm01_49814547_G_A	Gm01	49814547	G	A	CAACCTACATTGCTAAGAACTTGGTCTTTCACAAGTGCACGAAACATTTGGAGATTGACT[G/A]CCATGTTCCACAAGAAGTGTCAAACTAGGCTAGTGCATTTGGCTCTCCATTCCAAATTTT	Y	C	1	0.77	Y		0.344	0.036	0.185185	0.411	0.325
BARC_1.01_Gm01_49816449_T_C	Gm01	49816449	T	C	TTCTATACTAGGCCGAGCACTCAAGGCCATATTGATTTCAAAACTACATATTAAAAAAAC[T/C]TAACCCAGAGTAAATGTACCAACAAAAAATCTTCGTAGAGTAAATCCTAAAATTCTTAAA	Y	B	0.965	0.80095	Y		0.457	0.271	0.403315	0.145	0.449
BARC_1.01_Gm01_49817535_A_C	Gm01	49817535	A	C	GTCGGTATTCTCCCCGTGAACTCGTTGTTCTCCAACGATAACGACGAAAGCTTCGGCATC[A/C]CCGCCATGAACGACGGCAAAAACCCCTTAAGCCTGTTGTTGCTCAGATCAACCGCTACAA	N	B	0.854	0.70882	Unknown	CDS
BARC_1.01_Gm01_49828545_T_C	Gm01	49828545	T	C	ATGCCGTCGACTTTTCCCTTGGCACTGATCTCAGCCTCCGCCTCCCCTCCTCCTTCGGAT[T/C]TGAAGTTTCTATTAACGGAAACGACTAAGAAGTCGGTAATCCTGGTGAAGGATCTAGACC	Y	B	1	0.83	Y		0.29	0.011	0.145946	0.22	0.175
BARC_1.01_Gm01_49840722_A_G	Gm01	49840722	A	G	TTCCAACTTGTGTCTTTTCTGTTATATCTTAATTGCACAAACAATCCTACATTGCTCAAT[A/G]TCATTACCTTTATGTTGTCTTTCTTTAAACTTTGGTTTTGCATACTACGAAGTTTCAGGG	Y	B	0.772	0.64076	Y		0.347	0.036	0.18617	0.392	0.337
BARC_1.01_Gm01_49848412_G_A	Gm01	49848412	G	A	ATCATCATTCAACTTTGAGAATCTGGGGTTCCTTTGAACCGACCCAGCCATAGAACCAAA[G/A]CATTTGTGCCGAATTCCAACACCCCATTGTTTGGTTTCCGCGAAATTTCTTGAAGGATTG	Y	C	0.9	0.693	Y	5UTR	0.347	0.036	0.18617	0.442	0.316
[truncated: 58,956 more rows]
