# Supplementary material for: Development and Evaluation of SoySNP50K, a High-Density Genotyping Array for Soybean
Source: PLoS One. 2013 Jan 25;8(1):e54985. doi: 10.1371/journal.pone.0054985 (PMC3555945; doi:10.1371/journal.pone.0054985)
Supplement: Table S3 — Accession IDs, province and country of origin, and latitude and longitude at which the 96 G. soja accessions used in this study were collected. (XLSX) [file pone.0054985.s003.xlsx]

## Sheet: ABC
Table S3. Accession IDs, province and country of origin, and latitude and longitude at which the 96 G. soja accessions used in this study were collected
Accession ID	Country	Province	Site of collection	Latitude	Longitude
PI065549	China	Heilongjiang	Sungari River bottom	45.8288	126.686
PI339731	South Korea	Kangwon	Chang Nam Ri, Du Chon Myun, Hong Cheon Kun	37.91	128.04
PI339871A	South Korea	Cheju	Cheju Experiment Station	33.4199	126.5
PI342620A	Russia	Primorye	SE of Vladivostok Experiment Station	43.0809	131.956
PI342621A	Russia	Amur	Field of Amur Experiment Station	52.9776	127.362
PI349647	South Korea	Kyonggi	Collected near Suweon	37.284	127.019
PI366119	Japan	Aichi	Taketoyo	34.85	136.917
PI378685	Japan	Ehime	Kikuma	34.0333	132.85
PI378686A	Japan	Kochi	Tosashimizu	32.7809	132.954
PI378690	Japan	Fukuoka	Okawa	33.2	130.367
PI378697B	Japan	Aomori	Hirosaki	40.6	140.467
PI378698	Japan	Yamanashi	Oshino	35.45	138.85
PI378700	Japan	Yamagata	Murayama	38.4826	140.379
PI407022	Japan	Akita	Imaizumi, Nishisenboku-cho, roadside near pond	39.565	140.403
PI407094	Japan	Hyogo	Western Sanda	34.8833	135.193
PI407097	Japan	Hyogo	Near Yamada River between Minotani and Toda	34.7574	135.155
PI407158	Japan	Chiba	Godaihata	35.6	140.117
PI407222	South Korea	Chungchong Puk	Umseong Gun, Munam Ri, Wonnam Myun.	36.855	127.63
PI407238	South Korea	Chungchong Nam	Yongi Gun, Upnae Ri, Choneui Myun.	36.68	127.2
PI407285	Japan	Kanagawa	Kanto-Tosan region	35.587	139.345
PI407288	China	Jilin	Nan Wai Tse Commune near Kungchuling	43.5072	124.812
PI407293	China	Jilin	Near the Nan Hu Hotel, Changchun	43.8484	125.309
PI407321	South Korea	Chungchong Puk	Wolgok-Ri, Kangnae-Myun, Chungwon Gun	36.62	127.37
PI424004A	South Korea	Kyonggi	Sung-gok Ri, Goon-ja Myeon, Shih-heung Gun	37.4172	126.793
PI424025C	South Korea	Kyonggi	Gacha 1 Ri, Shin-book Myeon, Pocheun Gun	37.9	127.2
PI424028	South Korea	Kyonggi	Eun-chun Ri, Young-book Myeon, Po-chun Gun	38.07	127.3
PI424032	South Korea	Kyonggi	Ma-san Ri, Nam Myeon, Yang-joo Gun	37.899	127.977
PI424095	South Korea	Chungchong Puk	Hwang-gan Ri, Hwang-gan Myeon, Young-dong Gun	36.175	127.776
PI424114A	South Korea	Kyongsang Puk	Ai-ryun Dong, Chung-tong Myeon, Young-chun Gun	35.9909	128.826
PI424116	South Korea	Kyongsang Puk	Mai-hwai Dong, Im-go Myeon, Young-chun Gun	36.0211	128.974
PI424123	South Korea	Kyongsang Nam	Bong-gye Ri, Goo-dong Myeon, Wool-joo Gun	35.4606	128.213
PI424129	South Korea	Cholla Puk	Chung-eup, in entrance to the Nai-jang-sa Temple	35.4894	126.902
PI458537B	China	Heilongjiang	Binxian County	45.7333	127.45
PI458539A	China	Heilongjiang	Xuenke County	48.8192	128.408
PI464866A	China	Heilongjiang	Bei An County	48.1083	127.075
PI464925C	China	Liaoning	Chung Tu County	43.2157	124.058
PI464927A	China	Liaoning	Tie Lin County	42.4642	124.04
PI464928	China	Liaoning	Sin Bin County	41.7123	124.909
PI464929A	China	Liaoning	Hai Chen County	40.8047	122.781
PI468396A	China	Shanxi	Lucheng	36.4192	113.197
PI468397A	China	Shanxi	Taiyuanchen	37.7593	112.424
PI468399A	China	Shandong	Shouguang	37.0372	118.909
PI468400A	China	Ningxia		37.3273	106.04
PI483462A	China	Beijing	Tongxian	39.9053	116.599
PI483465	China	Shaanxi	Dali	34.8807	110.01
PI483466	China	Shandong	Feicheng	36.2384	116.841
PI483467	China	Henan	Shenqiu	33.5091	115.227
PI483468B	China	Henan	Shenqiu	33.5091	115.227
PI486220	Japan	Shizuoka	On campus of the National Institute of Genetics, Mishima	35.1167	138.917
PI487431	Japan	Kagoshima	Ibusuki	31.2	130.6
PI504289	Japan	Iwate	Shore of Kitakami River, Kitakami City.	39.3333	141
PI504290	Japan	Iwate	Shore of Iwaigawa River, Ichinoseki City	38.8333	141
PI507590B	Japan	Akita	Kawabe	39.6667	140.25
PI507595	Japan	Niigata	Tsunan	37.0097	138.651
PI507602	Japan	Ibaraki	Yatabe	35.7771	140.742
PI507613	Japan	Gumma	Isezaki	36.3167	139.183
PI507617	Japan	Nagano	Hakuba, Nagano Ken.	40.0606	124.558
PI507623	Japan	Tokyo	Kodaira	35.7264	139.484
PI507624	Japan	Gifu	Nakatsuga	35.4833	137.5
PI507625	Japan	Fukui		36	136.25
PI507644	Japan	Ehime	Matsuyama	33.8364	132.753
PI507646	Japan	Hiroshima	Fukuyama	34.4833	133.367
PI507648	Japan	Okayama	Kume	35	133.917
PI507650	Japan	Tottori		35.5	134.233
PI507655	Japan	Nagasaki	Ashibe	33	129.5
PI507658	Japan	Kagoshima	Izumi	32.0833	130.367
PI507661	Japan	Kagoshima	Kurino	31.95	130.717
PI507663	Japan	Kagoshima	Ijuin	31.6167	130.4
PI507735	Russia	Amur	From Far East	64.4132	144.034
PI507847	Russia	Amur		52.97	127.35
PI508060	Japan	Hokkaido	Biratori near the Saru River.	42.5833	142.133
PI508064	Japan	Hokkaido	NE of Shizunai, near Shizunai River.	42.3669	142.411
PI514674	Japan	Hokkaido	Near Amanogawa River, southern Hokkaido	42.7551	142.745
PI522180	China	Heilongjiang	Xunke	48.8192	128.408
PI522184	China	Heilongjiang	Binxian	45.7333	127.45
PI522194A	Russia	Primorye	Far East	45	135
PI532449	China	Jilin	Nongan	44	125
PI532450	China	Jilin	Hunjiang	42	126
PI532453B	China	Jilin	Hunchun	43	130
PI549032	China	Liaoning	Fengcheng	40.5476	124.066
PI549047	China	Beijing	Wangre Shan	40.2215	116.428
PI549048	China	Beijing	Changping	40.1873	116.198
PI562553	South Korea	Chungchong Nam	Chung Ch'ong Nam Do.	36.1833	126.567
PI562557	South Korea	Cholla Puk	Chonju City, Cholla Buk Do.	35.8167	127.117
PI578343	Russia	Khabarovsk	Habarovsk region	48.4969	135.132
PI593983	Japan	Hokkaido	Hidaka district	42.8728	142.441
PI597448A	China	Heilongjiang	Collected in the wild near Jiamusi, Hua Chuan County	46.804	130.426
PI597450A	China	Heilongjiang	Collected in the wild near Jiamusi, Hua Chuan County	46.8361	130.36
PI597452A	China	Shanxi	Dingxiang	38.5187	113.027
PI597453	China	Shanxi	Taiyuan	37.8581	112.581
PI597455	China	Shanxi	Yuci	37.6673	112.862
PI597456	China	Shanxi	Taigu	37.4537	112.761
PI597457B	China	Shandong	Laiyang	36.8314	120.747
PI597459A	China	Shandong	Yexian	37.2271	119.933
PI597461B	China	Shandong	Changle	36.6002	118.967
PI597462A	China	Shandong	Feixian	35.4515	118.023
